# Supplementary material for: The Mars1 kinase confers photoprotection through signaling in the chloroplast unfolded protein response
Source: eLife. 2019 Oct 15;8:e49577. doi: 10.7554/eLife.49577 (PMC6794094; doi:10.7554/eLife.49577)
Supplement: Figure 2—source data 1. [file elife-49577-fig2-data1.xlsx]

## Sheet: all mutants
	Label	YFP Max: no Vit	YFP Max: plus Vit	norm YFP Max: no Vit YFP	norm YFP Max: plus Vit YFP	log norm YFP Max: no Vit YFP	log norm YFP Max: plus Vit YFP	log-Area 6days:48 hrs Ratio	norm log-Max: plus to no Vit YFP Ratio
1	110-UNSEP1.gel-no Vit 6.tif:1: A-1	1838	1544	0.973	0.246	-0.039	-2.023	NaN	-1.985
2	110-UNSEP1.gel-no Vit 6.tif:2: A-2	1744	1514	0.923	0.241	-0.115	-2.051	NaN	-1.938
3	110-UNSEP1.gel-no Vit 6.tif:3: A-3	2063	6509	1.092	1.037	0.127	0.053	0.678	-0.076
4	110-UNSEP1.gel-no Vit 6.tif:4: A-4	1976	7494	1.046	1.194	0.065	0.256	0.206	0.189
5	110-UNSEP1.gel-no Vit 6.tif:5: A-5	2242	7372	1.187	1.175	0.247	0.232	0.29	-0.017
6	110-UNSEP1.gel-no Vit 6.tif:6: A-6	1825	1638	0.966	0.261	-0.049	-1.938	NaN	-1.89
7	110-UNSEP1.gel-no Vit 6.tif:7: A-7	1842	1700	0.975	0.271	-0.036	-1.884	NaN	-1.85
8	110-UNSEP1.gel-no Vit 6.tif:8: A-8	1926	1696	1.02	0.27	0.028	-1.888	NaN	-1.917
9	110-UNSEP1.gel-no Vit 6.tif:9: A-9	2853	10552	1.511	1.682	0.595	0.75	0	0.153
10	110-UNSEP1.gel-no Vit 6.tif:10: A-10	2358	8514	1.249	1.357	0.32	0.44	-0.115	0.118
11	110-UNSEP1.gel-no Vit 6.tif:11: A-11	1923	1798	1.018	0.287	0.026	-1.803	NaN	-1.831
12	110-UNSEP1.gel-no Vit 6.tif:12: A-12	2339	11157	1.238	1.778	0.309	0.83	0.181	0.52
13	110-UNSEP1.gel-no Vit 6.tif:13: A-13	1857	1878	0.983	0.299	-0.024	-1.74	NaN	-1.718
14	110-UNSEP1.gel-no Vit 6.tif:14: A-14	2138	1898	1.132	0.302	0.179	-1.725	NaN	-1.906
15	110-UNSEP1.gel-no Vit 6.tif:15: A-15	2125	10832	1.125	1.726	0.17	0.788	0.363	0.616
16	110-UNSEP1.gel-no Vit 6.tif:16: A-16	2311	1955	1.224	0.312	0.291	-1.683	NaN	-1.975
17	110-UNSEP1.gel-no Vit 6.tif:17: A-17	1906	2538	1.009	0.404	0.013	-1.306	NaN	-1.321
18	110-UNSEP1.gel-no Vit 6.tif:18: A-18	2445	11079	1.295	1.765	0.373	0.82	0.152	0.446
19	110-UNSEP1.gel-no Vit 6.tif:19: A-19	1885	3225	0.998	0.514	-0.003	-0.96	NaN	-0.959
20	110-UNSEP1.gel-no Vit 6.tif:20: A-20	1892	2093	1.002	0.334	0.003	-1.584	NaN	-1.588
21	110-UNSEP1.gel-no Vit 6.tif:21: A-21	1892	2107	1.002	0.336	0.003	-1.575	NaN	-1.579
22	110-UNSEP1.gel-no Vit 6.tif:22: A-22	1861	2136	0.985	0.34	-0.021	-1.555	NaN	-1.535
23	110-UNSEP1.gel-no Vit 6.tif:23: A-23	1838	2198	0.973	0.35	-0.039	-1.514	NaN	-1.476
24	110-UNSEP1.gel-no Vit 6.tif:24: A-24	2021	15269	1.07	2.433	0.098	1.283	-0.29	1.184
25	110-UNSEP1.gel-no Vit 6.tif:25: B-1	1784	1426	0.945	0.227	-0.082	-2.138	NaN	-2.057
26	110-UNSEP1.gel-no Vit 6.tif:26: B-2	1978	7492	1.047	1.194	0.067	0.256	0.222	0.187
27	110-UNSEP1.gel-no Vit 6.tif:27: B-3	2287	10307	1.211	1.642	0.276	0.716	-0.115	0.438
28	110-UNSEP1.gel-no Vit 6.tif:28: B-4	2264	1589	1.199	0.253	0.262	-1.982	NaN	-2.245
29	110-UNSEP1.gel-no Vit 6.tif:29: B-5	1825	5197	0.966	0.828	-0.049	-0.272	0.807	-0.224
30	110-UNSEP1.gel-no Vit 6.tif:30: B-6	2078	7419	1.1	1.182	0.138	0.242	0.1	0.102
31	110-UNSEP1.gel-no Vit 6.tif:31: B-7	2256	9035	1.195	1.44	0.256	0.526	-0.115	0.268
32	110-UNSEP1.gel-no Vit 6.tif:32: B-8	1820	1767	0.964	0.282	-0.053	-1.828	NaN	-1.776
33	110-UNSEP1.gel-no Vit 6.tif:33: B-9	2266	11200	1.2	1.785	0.263	0.836	0	0.571
34	110-UNSEP1.gel-no Vit 6.tif:34: B-10	1923	7789	1.018	1.241	0.026	0.312	0.126	0.284
35	110-UNSEP1.gel-no Vit 6.tif:35: B-11	1652	1835	0.875	0.292	-0.193	-1.774	NaN	-1.582
36	110-UNSEP1.gel-no Vit 6.tif:36: B-12	1903	5152	1.008	0.821	0.011	-0.285	0.9	-0.297
37	110-UNSEP1.gel-no Vit 6.tif:37: B-13	1653	1679	0.875	0.268	-0.192	-1.902	NaN	-1.711
38	110-UNSEP1.gel-no Vit 6.tif:38: B-14	1883	9494	0.997	1.513	-0.004	0.597	0	0.6
39	110-UNSEP1.gel-no Vit 6.tif:39: B-15	2328	9462	1.233	1.508	0.302	0.592	0.107	0.289
40	110-UNSEP1.gel-no Vit 6.tif:40: B-16	1993	8720	1.055	1.39	0.078	0.475	0.531	0.396
41	110-UNSEP1.gel-no Vit 6.tif:41: B-17	2202	1782	1.166	0.284	0.222	-1.816	NaN	-2.039
42	110-UNSEP1.gel-no Vit 6.tif:42: B-18	2186	15386	1.157	2.452	0.211	1.294	-0.263	1.081
43	110-UNSEP1.gel-no Vit 6.tif:43: B-19	2656	12094	1.406	1.927	0.492	0.947	0.28	0.453
44	110-UNSEP1.gel-no Vit 6.tif:44: B-20	1969	8697	1.043	1.386	0.06	0.471	0.433	0.409
45	110-UNSEP1.gel-no Vit 6.tif:45: B-21	1765	1932	0.935	0.308	-0.098	-1.7	NaN	-1.603
46	110-UNSEP1.gel-no Vit 6.tif:46: B-22	1805	1880	0.956	0.3	-0.065	-1.739	NaN	-1.675
47	110-UNSEP1.gel-no Vit 6.tif:47: B-23	1826	7191	0.967	1.146	-0.049	0.197	0.604	0.244
48	110-UNSEP1.gel-no Vit 6.tif:48: B-24	1810	2001	0.958	0.319	-0.061	-1.649	NaN	-1.589
49	110-UNSEP1.gel-no Vit 6.tif:49: C-1	2045	8458	1.083	1.348	0.115	0.431	0.115	0.314
50	110-UNSEP1.gel-no Vit 6.tif:50: C-2	3589	1396	1.9	0.222	0.926	-2.168	NaN	-3.096
51	110-UNSEP1.gel-no Vit 6.tif:51: C-3	1929	4872	1.021	0.776	0.031	-0.365	0.737	-0.397
52	110-UNSEP1.gel-no Vit 6.tif:52: C-4	1970	9593	1.043	1.529	0.061	0.612	-0.348	0.55
53	110-UNSEP1.gel-no Vit 6.tif:53: C-5	2061	7248	1.091	1.155	0.126	0.208	-0.152	0.08
54	110-UNSEP1.gel-no Vit 6.tif:54: C-6	1666	1489	0.882	0.237	-0.181	-2.075	NaN	-1.896
55	110-UNSEP1.gel-no Vit 6.tif:55: C-7	1640	1514	0.868	0.241	-0.204	-2.051	NaN	-1.849
56	110-UNSEP1.gel-no Vit 6.tif:56: C-8	1655	1559	0.876	0.248	-0.19	-2.009	NaN	-1.82
57	110-UNSEP1.gel-no Vit 6.tif:57: C-9	1811	1584	0.959	0.252	-0.061	-1.986	NaN	-1.927
58	110-UNSEP1.gel-no Vit 6.tif:58: C-10	1692	1589	0.896	0.253	-0.159	-1.982	NaN	-1.824
59	110-UNSEP1.gel-no Vit 6.tif:59: C-11	1635	1622	0.866	0.258	-0.208	-1.952	NaN	-1.745
60	110-UNSEP1.gel-no Vit 6.tif:60: C-12	1898	1628	1.005	0.259	0.007	-1.947	NaN	-1.955
61	110-UNSEP1.gel-no Vit 6.tif:61: C-13	1983	7108	1.05	1.133	0.07	0.18	0.126	0.108
62	110-UNSEP1.gel-no Vit 6.tif:62: C-14	1612	1684	0.854	0.268	-0.228	-1.898	NaN	-1.671
63	110-UNSEP1.gel-no Vit 6.tif:63: C-15	1799	8656	0.953	1.379	-0.07	0.464	0	0.533
64	110-UNSEP1.gel-no Vit 6.tif:64: C-16	2686	12082	1.422	1.925	0.508	0.945	0	0.436
65	110-UNSEP1.gel-no Vit 6.tif:65: C-17	2512	11120	1.33	1.772	0.412	0.825	0	0.412
66	110-UNSEP1.gel-no Vit 6.tif:66: C-18	1855	2674	0.982	0.426	-0.026	-1.231	NaN	-1.206
67	110-UNSEP1.gel-no Vit 6.tif:67: C-19	1898	8248	1.005	1.314	0.007	0.394	0.474	0.386
68	110-UNSEP1.gel-no Vit 6.tif:68: C-20	2102	13060	1.113	2.081	0.154	1.057	-0.17	0.902
69	110-UNSEP1.gel-no Vit 6.tif:69: C-21	2444	11817	1.294	1.883	0.372	0.913	0.556	0.54
70	110-UNSEP1.gel-no Vit 6.tif:70: C-22	2448	14201	1.296	2.263	0.374	1.178	-0.234	0.803
71	110-UNSEP1.gel-no Vit 6.tif:71: C-23	2964	1893	1.569	0.302	0.65	-1.729	NaN	-2.381
72	110-UNSEP1.gel-no Vit 6.tif:72: C-24	2572	11816	1.362	1.883	0.446	0.913	0	0.466
73	110-UNSEP1.gel-no Vit 6.tif:73: D-1	2238	8549	1.185	1.362	0.245	0.446	0.115	0.2
74	110-UNSEP1.gel-no Vit 6.tif:74: D-2	1713	7284	0.907	1.161	-0.141	0.215	0.241	0.354
75	110-UNSEP1.gel-no Vit 6.tif:75: D-3	2403	7682	1.272	1.224	0.348	0.292	1.087	-0.057
76	110-UNSEP1.gel-no Vit 6.tif:76: D-4	2125	8506	1.125	1.355	0.17	0.439	0.363	0.267
77	110-UNSEP1.gel-no Vit 6.tif:77: D-5	2541	11165	1.345	1.779	0.428	0.831	-0.107	0.402
78	110-UNSEP1.gel-no Vit 6.tif:78: D-6	1823	6584	0.965	1.049	-0.051	0.069	0	0.119
79	110-UNSEP1.gel-no Vit 6.tif:79: D-7	2021	9835	1.07	1.567	0.098	0.648	0.138	0.549
80	110-UNSEP1.gel-no Vit 6.tif:80: D-8	1848	6959	0.979	1.109	-0.031	0.149	-0.126	0.179
81	110-UNSEP1.gel-no Vit 6.tif:81: D-9	2045	10069	1.083	1.605	0.115	0.682	-0.17	0.566
82	110-UNSEP1.gel-no Vit 6.tif:82: D-10	1720	1769	0.911	0.282	-0.135	-1.827	NaN	-1.693
83	110-UNSEP1.gel-no Vit 6.tif:83: D-11	2008	10317	1.063	1.644	0.088	0.717	-0.152	0.627
84	110-UNSEP1.gel-no Vit 6.tif:84: D-12	1755	8470	0.929	1.35	-0.106	0.433	-0.115	0.537
85	110-UNSEP1.gel-no Vit 6.tif:85: D-13	1651	1841	0.874	0.293	-0.194	-1.769	NaN	-1.577
86	110-UNSEP1.gel-no Vit 6.tif:86: D-14	1629	1723	0.863	0.275	-0.213	-1.865	NaN	-1.653
87	110-UNSEP1.gel-no Vit 6.tif:87: D-15	1979	7553	1.048	1.204	0.067	0.267	0.737	0.198
88	110-UNSEP1.gel-no Vit 6.tif:88: D-16	1960	7958	1.038	1.268	0.054	0.343	0.716	0.288
89	110-UNSEP1.gel-no Vit 6.tif:89: D-17	2203	10500	1.166	1.673	0.222	0.743	0.415	0.519
90	110-UNSEP1.gel-no Vit 6.tif:90: D-18	2096	11622	1.11	1.852	0.15	0.889	-0.17	0.737
91	110-UNSEP1.gel-no Vit 6.tif:91: D-19	1630	1941	0.863	0.309	-0.212	-1.693	NaN	-1.482
92	110-UNSEP1.gel-no Vit 6.tif:92: D-20	1914	10547	1.013	1.681	0.019	0.749	-0.222	0.728
93	110-UNSEP1.gel-no Vit 6.tif:93: D-21	1775	9380	0.94	1.495	-0.089	0.58	0.082	0.668
94	110-UNSEP1.gel-no Vit 6.tif:94: D-22	3264	9719	1.728	1.549	0.789	0.631	0.613	-0.16
95	110-UNSEP1.gel-no Vit 6.tif:95: D-23	23652	2505	12.524	0.399	3.647	-1.325	NaN	-4.973
96	110-UNSEP1.gel-no Vit 6.tif:96: D-24	2498	2013	1.323	0.321	0.403	-1.64	NaN	-2.045
97	110-UNSEP1.gel-no Vit 6.tif:97: E-1	1787	5649	0.946	0.9	-0.08	-0.152	0.222	-0.073
98	110-UNSEP1.gel-no Vit 6.tif:98: E-2	1598	1476	0.846	0.235	-0.241	-2.088	NaN	-1.848
99	110-UNSEP1.gel-no Vit 6.tif:99: E-3	1601	1412	0.848	0.225	-0.238	-2.152	NaN	-1.915
100	110-UNSEP1.gel-no Vit 6.tif:100: E-4	1783	5974	0.944	0.952	-0.083	-0.071	-0.322	0.011
101	110-UNSEP1.gel-no Vit 6.tif:101: E-5	1889	5915	1	0.943	0.0003183	-0.085	0.943	-0.087
102	110-UNSEP1.gel-no Vit 6.tif:102: E-6	1713	1614	0.907	0.257	-0.141	-1.959	NaN	-1.82
103	110-UNSEP1.gel-no Vit 6.tif:103: E-7	2081	10681	1.102	1.702	0.14	0.767	-0.152	0.626
104	110-UNSEP1.gel-no Vit 6.tif:104: E-8	1731	1529	0.917	0.244	-0.126	-2.037	NaN	-1.913
105	110-UNSEP1.gel-no Vit 6.tif:105: E-9	1673	1554	0.886	0.248	-0.175	-2.014	NaN	-1.84
106	110-UNSEP1.gel-no Vit 6.tif:106: E-10	1733	1686	0.918	0.269	-0.124	-1.896	NaN	-1.773
107	110-UNSEP1.gel-no Vit 6.tif:107: E-11	2462	13560	1.304	2.161	0.383	1.112	-0.241	0.728
108	110-UNSEP1.gel-no Vit 6.tif:108: E-12	1747	1669	0.925	0.266	-0.112	-1.911	NaN	-1.8
109	110-UNSEP1.gel-no Vit 6.tif:109: E-13	1648	1685	0.873	0.269	-0.197	-1.897	NaN	-1.702
110	110-UNSEP1.gel-no Vit 6.tif:110: E-14	2180	10242	1.154	1.632	0.207	0.707	-0.322	0.498
111	110-UNSEP1.gel-no Vit 6.tif:111: E-15	1655	2011	0.876	0.32	-0.19	-1.642	NaN	-1.453
112	110-UNSEP1.gel-no Vit 6.tif:112: E-16	2270	13023	1.202	2.075	0.265	1.053	-0.138	0.786
113	110-UNSEP1.gel-no Vit 6.tif:113: E-17	1728	1734	0.915	0.276	-0.128	-1.856	NaN	-1.729
114	110-UNSEP1.gel-no Vit 6.tif:114: E-18	2060	14296	1.091	2.278	0.125	1.188	0	1.061
115	110-UNSEP1.gel-no Vit 6.tif:115: E-19	1638	1815	0.867	0.289	-0.205	-1.79	NaN	-1.586
116	110-UNSEP1.gel-no Vit 6.tif:116: E-20	2071	1845	1.097	0.294	0.133	-1.766	NaN	-1.901
117	110-UNSEP1.gel-no Vit 6.tif:117: E-21	2153	13341	1.14	2.126	0.189	1.088	-0.28	0.898
118	110-UNSEP1.gel-no Vit 6.tif:118: E-22	2237	12753	1.184	2.032	0.244	1.023	-0.193	0.777
119	110-UNSEP1.gel-no Vit 6.tif:119: E-23	2624	2110	1.389	0.336	0.474	-1.572	NaN	-2.048
120	110-UNSEP1.gel-no Vit 6.tif:120: E-24	2302	17268	1.219	2.752	0.286	1.46	-0.074	1.173
121	110-UNSEP1.gel-no Vit 6.tif:121: F-1	1769	6062	0.937	0.966	-0.094	-0.05	0	0.043
122	110-UNSEP1.gel-no Vit 6.tif:122: F-2	1592	1379	0.843	0.22	-0.246	-2.186	NaN	-1.941
123	110-UNSEP1.gel-no Vit 6.tif:123: F-3	1900	7089	1.006	1.13	0.009	0.176	0.83	0.166
124	110-UNSEP1.gel-no Vit 6.tif:124: F-4	2991	1497	1.584	0.239	0.663	-2.068	NaN	-2.732
125	110-UNSEP1.gel-no Vit 6.tif:125: F-5	2112	10280	1.118	1.638	0.161	0.712	0.441	0.549
126	110-UNSEP1.gel-no Vit 6.tif:126: F-6	1621	1626	0.858	0.259	-0.22	-1.948	NaN	-1.729
127	110-UNSEP1.gel-no Vit 6.tif:127: F-7	1692	1539	0.896	0.245	-0.159	-2.028	NaN	-1.871
128	110-UNSEP1.gel-no Vit 6.tif:128: F-8	1678	1524	0.888	0.243	-0.171	-2.042	NaN	-1.873
129	110-UNSEP1.gel-no Vit 6.tif:129: F-9	1760	1601	0.932	0.255	-0.102	-1.971	NaN	-1.87
130	110-UNSEP1.gel-no Vit 6.tif:130: F-10	2050	6119	1.085	0.975	0.118	-0.036	-0.126	-0.156
131	110-UNSEP1.gel-no Vit 6.tif:131: F-11	1729	1648	0.916	0.263	-0.127	-1.929	NaN	-1.803
132	110-UNSEP1.gel-no Vit 6.tif:132: F-12	2067	11367	1.094	1.811	0.13	0.857	0.348	0.725
133	110-UNSEP1.gel-no Vit 6.tif:133: F-13	1613	1745	0.854	0.278	-0.228	-1.846	NaN	-1.62
134	110-UNSEP1.gel-no Vit 6.tif:134: F-14	1765	1807	0.935	0.288	-0.098	-1.796	NaN	-1.7
135	110-UNSEP1.gel-no Vit 6.tif:135: F-15	1967	2197	1.042	0.35	0.059	-1.514	NaN	-1.574
136	110-UNSEP1.gel-no Vit 6.tif:136: F-16	1795	1769	0.95	0.282	-0.073	-1.827	NaN	-1.755
137	110-UNSEP1.gel-no Vit 6.tif:137: F-17	1633	1936	0.865	0.309	-0.21	-1.697	NaN	-1.488
138	110-UNSEP1.gel-no Vit 6.tif:138: F-18	1626	1819	0.861	0.29	-0.216	-1.787	NaN	-1.572
139	110-UNSEP1.gel-no Vit 6.tif:139: F-19	2041	10561	1.081	1.683	0.112	0.751	-0.241	0.638
140	110-UNSEP1.gel-no Vit 6.tif:140: F-20	1629	2255	0.863	0.359	-0.213	-1.477	NaN	-1.265
141	110-UNSEP1.gel-no Vit 6.tif:141: F-21	1623	1865	0.859	0.297	-0.219	-1.751	NaN	-1.533
142	110-UNSEP1.gel-no Vit 6.tif:142: F-22	1633	2869	0.865	0.457	-0.21	-1.129	NaN	-0.921
143	110-UNSEP1.gel-no Vit 6.tif:143: F-23	2094	1933	1.109	0.308	0.149	-1.699	NaN	-1.849
144	110-UNSEP1.gel-no Vit 6.tif:144: F-24	1769	2038	0.937	0.325	-0.094	-1.623	NaN	-1.53
145	110-UNSEP1.gel-no Vit 6.tif:145: G-1	1967	1430	1.042	0.228	0.059	-2.134	NaN	-2.194
146	110-UNSEP1.gel-no Vit 6.tif:146: G-2	1747	1374	0.925	0.219	-0.112	-2.191	NaN	-2.08
147	110-UNSEP1.gel-no Vit 6.tif:147: G-3	1887	9171	0.999	1.461	-0.001	0.547	-0.263	0.547
148	110-UNSEP1.gel-no Vit 6.tif:148: G-4	1621	1516	0.858	0.242	-0.22	-2.049	NaN	-1.83
149	110-UNSEP1.gel-no Vit 6.tif:149: G-5	1617	1649	0.856	0.263	-0.224	-1.928	NaN	-1.706
150	110-UNSEP1.gel-no Vit 6.tif:150: G-6	2045	8840	1.083	1.409	0.115	0.494	-0.138	0.378
151	110-UNSEP1.gel-no Vit 6.tif:151: G-7	1630	1705	0.863	0.272	-0.212	-1.88	NaN	-1.669
152	110-UNSEP1.gel-no Vit 6.tif:152: G-8	1833	1523	0.971	0.243	-0.043	-2.043	NaN	-2.001
153	110-UNSEP1.gel-no Vit 6.tif:153: G-9	1964	1697	1.04	0.27	0.056	-1.887	NaN	-1.945
154	110-UNSEP1.gel-no Vit 6.tif:154: G-10	1931	9087	1.022	1.448	0.032	0.534	-0.263	0.501
155	110-UNSEP1.gel-no Vit 6.tif:155: G-11	1743	1622	0.923	0.258	-0.116	-1.952	NaN	-1.838
156	110-UNSEP1.gel-no Vit 6.tif:156: G-12	1788	1924	0.947	0.307	-0.079	-1.706	NaN	-1.628
157	110-UNSEP1.gel-no Vit 6.tif:157: G-13	1668	1751	0.883	0.279	-0.179	-1.842	NaN	-1.664
158	110-UNSEP1.gel-no Vit 6.tif:158: G-14	1610	1928	0.852	0.307	-0.23	-1.703	NaN	-1.474
159	110-UNSEP1.gel-no Vit 6.tif:159: G-15	1660	1810	0.879	0.288	-0.186	-1.794	NaN	-1.609
160	110-UNSEP1.gel-no Vit 6.tif:160: G-16	2340	12559	1.239	2.001	0.309	1.001	-0.447	0.69
161	110-UNSEP1.gel-no Vit 6.tif:161: G-17	1617	1816	0.856	0.289	-0.224	-1.789	NaN	-1.566
162	110-UNSEP1.gel-no Vit 6.tif:162: G-18	1987	2069	1.052	0.33	0.073	-1.601	NaN	-1.675
163	110-UNSEP1.gel-no Vit 6.tif:163: G-19	1625	1962	0.86	0.313	-0.217	-1.677	NaN	-1.462
164	110-UNSEP1.gel-no Vit 6.tif:164: G-20	1627	1841	0.861	0.293	-0.215	-1.769	NaN	-1.556
165	110-UNSEP1.gel-no Vit 6.tif:165: G-21	1621	1921	0.858	0.306	-0.22	-1.708	NaN	-1.489
166	110-UNSEP1.gel-no Vit 6.tif:166: G-22	1655	2022	0.876	0.322	-0.19	-1.634	NaN	-1.445
167	110-UNSEP1.gel-no Vit 6.tif:167: G-23	2067	11884	1.094	1.894	0.13	0.921	-0.28	0.79
168	110-UNSEP1.gel-no Vit 6.tif:168: G-24	8059	15228	4.267	2.427	2.093	1.279	0	-0.816
169	110-UNSEP1.gel-no Vit 6.tif:169: H-1	1635	1426	0.866	0.227	-0.208	-2.138	NaN	-1.931
170	110-UNSEP1.gel-no Vit 6.tif:170: H-2	1597	1499	0.846	0.239	-0.242	-2.066	NaN	-1.825
171	110-UNSEP1.gel-no Vit 6.tif:171: H-3	1795	1500	0.95	0.239	-0.073	-2.065	NaN	-1.993
172	110-UNSEP1.gel-no Vit 6.tif:172: H-4	2347	10314	1.243	1.644	0.314	0.717	-0.263	0.402
173	110-UNSEP1.gel-no Vit 6.tif:173: H-5	1589	1480	0.841	0.236	-0.249	-2.084	NaN	-1.836
174	110-UNSEP1.gel-no Vit 6.tif:174: H-6	2304	10463	1.22	1.667	0.287	0.738	0	0.449
175	110-UNSEP1.gel-no Vit 6.tif:175: H-7	1715	1489	0.908	0.237	-0.139	-2.075	NaN	-1.938
176	110-UNSEP1.gel-no Vit 6.tif:176: H-8	1712	1530	0.906	0.244	-0.142	-2.036	NaN	-1.896
177	110-UNSEP1.gel-no Vit 6.tif:177: H-9	1703	1558	0.902	0.248	-0.149	-2.01	NaN	-1.862
178	110-UNSEP1.gel-no Vit 6.tif:178: H-10	1699	1593	0.9	0.254	-0.153	-1.978	NaN	-1.827
179	110-UNSEP1.gel-no Vit 6.tif:179: H-11	2296	11633	1.216	1.854	0.282	0.89	-0.193	0.607
180	110-UNSEP1.gel-no Vit 6.tif:180: H-12	1691	1627	0.895	0.259	-0.159	-1.947	NaN	-1.789
181	110-UNSEP1.gel-no Vit 6.tif:181: H-13	1617	1713	0.856	0.273	-0.224	-1.873	NaN	-1.651
182	110-UNSEP1.gel-no Vit 6.tif:182: H-14	1622	1692	0.859	0.27	-0.22	-1.891	NaN	-1.673
183	110-UNSEP1.gel-no Vit 6.tif:183: H-15	1667	1813	0.883	0.289	-0.18	-1.791	NaN	-1.613
184	110-UNSEP1.gel-no Vit 6.tif:184: H-16	1815	1822	0.961	0.29	-0.057	-1.784	NaN	-1.728
185	110-UNSEP1.gel-no Vit 6.tif:185: H-17	1738	1917	0.92	0.305	-0.12	-1.711	NaN	-1.592
186	110-UNSEP1.gel-no Vit 6.tif:186: H-18	1612	1857	0.854	0.296	-0.228	-1.757	NaN	-1.53
187	110-UNSEP1.gel-no Vit 6.tif:187: H-19	2373	15759	1.256	2.511	0.329	1.328	-0.341	0.998
188	110-UNSEP1.gel-no Vit 6.tif:188: H-20	1656	1950	0.877	0.311	-0.19	-1.686	NaN	-1.498
189	110-UNSEP1.gel-no Vit 6.tif:189: H-21	2060	6138	1.091	0.978	0.125	-0.032	1.322	-0.159
190	110-UNSEP1.gel-no Vit 6.tif:190: H-22	1629	1864	0.863	0.297	-0.213	-1.751	NaN	-1.539
191	110-UNSEP1.gel-no Vit 6.tif:191: H-23	2007	12591	1.063	2.006	0.088	1.005	-0.322	0.915
192	110-UNSEP1.gel-no Vit 6.tif:192: H-24	2170	16905	1.149	2.694	0.2	1.43	-0.415	1.228
193	110-UNSEP1.gel-no Vit 6.tif:193: I-1	1685	1414	0.892	0.225	-0.165	-2.15	NaN	-1.987
194	110-UNSEP1.gel-no Vit 6.tif:194: I-2	1606	4280	0.85	0.682	-0.234	-0.552	0.322	-0.32
195	110-UNSEP1.gel-no Vit 6.tif:195: I-3	1551	1556	0.821	0.248	-0.284	-2.012	NaN	-1.729
196	110-UNSEP1.gel-no Vit 6.tif:196: I-4	1661	1410	0.879	0.225	-0.185	-2.154	NaN	-1.97
197	110-UNSEP1.gel-no Vit 6.tif:197: I-5	1873	1471	0.992	0.234	-0.012	-2.093	NaN	-2.082
198	110-UNSEP1.gel-no Vit 6.tif:198: I-6	1882	1490	0.997	0.237	-0.005	-2.074	NaN	-2.071
199	110-UNSEP1.gel-no Vit 6.tif:199: I-7	1913	1484	1.013	0.236	0.019	-2.08	NaN	-2.1
200	110-UNSEP1.gel-no Vit 6.tif:200: I-8	1747	1549	0.925	0.247	-0.112	-2.018	NaN	-1.907
201	110-UNSEP1.gel-no Vit 6.tif:201: I-9	2194	10775	1.162	1.717	0.216	0.78	0	0.562
202	110-UNSEP1.gel-no Vit 6.tif:202: I-10	1893	1554	1.002	0.248	0.003	-2.014	NaN	-2.018
203	110-UNSEP1.gel-no Vit 6.tif:203: I-11	2485	11175	1.316	1.781	0.396	0.833	-0.17	0.435
204	110-UNSEP1.gel-no Vit 6.tif:204: I-12	2300	10473	1.218	1.669	0.284	0.739	0	0.453
205	110-UNSEP1.gel-no Vit 6.tif:205: I-13	1616	1628	0.856	0.259	-0.225	-1.947	NaN	-1.723
206	110-UNSEP1.gel-no Vit 6.tif:206: I-14	1840	1662	0.974	0.265	-0.038	-1.917	NaN	-1.881
207	110-UNSEP1.gel-no Vit 6.tif:207: I-15	1621	2550	0.858	0.406	-0.22	-1.299	NaN	-1.08
208	110-UNSEP1.gel-no Vit 6.tif:208: I-16	2032	11568	1.076	1.843	0.106	0.882	0.093	0.775
209	110-UNSEP1.gel-no Vit 6.tif:209: I-17	1641	2152	0.869	0.343	-0.203	-1.544	NaN	-1.343
210	110-UNSEP1.gel-no Vit 6.tif:210: I-18	2063	10593	1.092	1.688	0.127	0.755	0.115	0.626
211	110-UNSEP1.gel-no Vit 6.tif:211: I-19	1696	2060	0.898	0.328	-0.155	-1.607	NaN	-1.453
212	110-UNSEP1.gel-no Vit 6.tif:212: I-20	2274	13748	1.204	2.191	0.268	1.131	-0.241	0.862
213	110-UNSEP1.gel-no Vit 6.tif:213: I-21	2424	14773	1.284	2.354	0.36	1.235	-0.485	0.874
214	110-UNSEP1.gel-no Vit 6.tif:214: I-22	2056	14388	1.089	2.293	0.123	1.197	-0.322	1.073
215	110-UNSEP1.gel-no Vit 6.tif:215: I-23	1765	1953	0.935	0.311	-0.098	-1.684	NaN	-1.588
216	110-UNSEP1.gel-no Vit 6.tif:216: I-24	2323	15227	1.23	2.426	0.299	1.279	-0.415	0.979
217	110-UNSEP1.gel-no Vit 6.tif:217: J-1	2412	7051	1.277	1.124	0.353	0.168	0	-0.186
218	110-UNSEP1.gel-no Vit 6.tif:218: J-2	2068	7585	1.095	1.209	0.131	0.273	0.585	0.141
219	110-UNSEP1.gel-no Vit 6.tif:219: J-3	1869	7260	0.99	1.157	-0.015	0.21	0.193	0.224
220	110-UNSEP1.gel-no Vit 6.tif:220: J-4	1998	9367	1.058	1.493	0.081	0.578	-0.29	0.495
221	110-UNSEP1.gel-no Vit 6.tif:221: J-5	2260	8809	1.197	1.404	0.259	0.489	0.348	0.229
222	110-UNSEP1.gel-no Vit 6.tif:222: J-6	1632	1483	0.864	0.236	-0.211	-2.081	NaN	-1.872
223	110-UNSEP1.gel-no Vit 6.tif:223: J-7	2078	8938	1.1	1.424	0.138	0.51	0.848	0.371
224	110-UNSEP1.gel-no Vit 6.tif:224: J-8	1950	10017	1.033	1.596	0.046	0.675	-0.152	0.627
225	110-UNSEP1.gel-no Vit 6.tif:225: J-9	1682	1551	0.891	0.247	-0.167	-2.016	NaN	-1.851
226	110-UNSEP1.gel-no Vit 6.tif:226: J-10	1688	1634	0.894	0.26	-0.162	-1.941	NaN	-1.781
227	110-UNSEP1.gel-no Vit 6.tif:227: J-11	1701	1593	0.901	0.254	-0.151	-1.978	NaN	-1.828
228	110-UNSEP1.gel-no Vit 6.tif:228: J-12	2741	12132	1.451	1.933	0.537	0.951	0	0.412
229	110-UNSEP1.gel-no Vit 6.tif:229: J-13	1662	1632	0.88	0.26	-0.184	-1.943	NaN	-1.76
230	110-UNSEP1.gel-no Vit 6.tif:230: J-14	2327	10714	1.232	1.707	0.301	0.772	1.263	0.469
231	110-UNSEP1.gel-no Vit 6.tif:231: J-15	1617	1778	0.856	0.283	-0.224	-1.819	NaN	-1.597
232	110-UNSEP1.gel-no Vit 6.tif:232: J-16	2223	13920	1.177	2.218	0.235	1.149	-0.322	0.913
233	110-UNSEP1.gel-no Vit 6.tif:233: J-17	2055	12372	1.088	1.972	0.122	0.979	-0.29	0.856
234	110-UNSEP1.gel-no Vit 6.tif:234: J-18	2124	9813	1.125	1.564	0.169	0.645	0.585	0.474
235	110-UNSEP1.gel-no Vit 6.tif:235: J-19	1942	12111	1.028	1.93	0.04	0.949	-0.087	0.907
236	110-UNSEP1.gel-no Vit 6.tif:236: J-20	1656	1810	0.877	0.288	-0.19	-1.794	NaN	-1.606
237	110-UNSEP1.gel-no Vit 6.tif:237: J-21	2213	13284	1.172	2.117	0.229	1.082	0.093	0.852
238	110-UNSEP1.gel-no Vit 6.tif:238: J-22	1983	12592	1.05	2.007	0.07	1.005	0.1	0.933
239	110-UNSEP1.gel-no Vit 6.tif:239: J-23	1930	11877	1.022	1.893	0.031	0.92	0.1	0.888
240	110-UNSEP1.gel-no Vit 6.tif:240: J-24	2251	14985	1.192	2.388	0.253	1.256	0.222	1.001
241	110-UNSEP1.gel-no Vit 6.tif:241: K-1	2269	8872	1.201	1.414	0.265	0.5	-0.17	0.233
242	110-UNSEP1.gel-no Vit 6.tif:242: K-2	2126	9010	1.126	1.436	0.171	0.522	-0.363	0.35
243	110-UNSEP1.gel-no Vit 6.tif:243: K-3	1557	1420	0.824	0.226	-0.279	-2.144	NaN	-1.867
244	110-UNSEP1.gel-no Vit 6.tif:244: K-4	1572	1439	0.832	0.229	-0.265	-2.125	NaN	-1.861
245	110-UNSEP1.gel-no Vit 6.tif:245: K-5	1608	1453	0.851	0.232	-0.232	-2.111	NaN	-1.88
246	110-UNSEP1.gel-no Vit 6.tif:246: K-6	1902	7529	1.007	1.2	0.01	0.263	-0.322	0.251
247	110-UNSEP1.gel-no Vit 6.tif:247: K-7	2332	9435	1.235	1.504	0.304	0.588	0	0.283
248	110-UNSEP1.gel-no Vit 6.tif:248: K-8	1966	7298	1.041	1.163	0.058	0.218	-0.363	0.158
249	110-UNSEP1.gel-no Vit 6.tif:249: K-9	1795	8588	0.95	1.369	-0.073	0.453	0	0.525
250	110-UNSEP1.gel-no Vit 6.tif:250: K-10	2154	9629	1.141	1.534	0.19	0.618	-0.107	0.427
251	110-UNSEP1.gel-no Vit 6.tif:251: K-11	3035	1590	1.607	0.253	0.684	-1.981	NaN	-2.666
252	110-UNSEP1.gel-no Vit 6.tif:252: K-12	2029	10710	1.074	1.707	0.103	0.771	-0.107	0.666
253	110-UNSEP1.gel-no Vit 6.tif:253: K-13	2077	10345	1.1	1.649	0.137	0.721	-0.222	0.583
254	110-UNSEP1.gel-no Vit 6.tif:254: K-14	2524	13226	1.336	2.108	0.418	1.076	-0.459	0.656
255	110-UNSEP1.gel-no Vit 6.tif:255: K-15	1751	1712	0.927	0.273	-0.109	-1.874	NaN	-1.766
256	110-UNSEP1.gel-no Vit 6.tif:256: K-16	2370	14593	1.255	2.325	0.328	1.218	-0.348	0.889
257	110-UNSEP1.gel-no Vit 6.tif:257: K-17	2091	13416	1.107	2.138	0.147	1.096	-0.263	0.948
258	110-UNSEP1.gel-no Vit 6.tif:258: K-18	1679	1836	0.889	0.293	-0.17	-1.773	NaN	-1.605
259	110-UNSEP1.gel-no Vit 6.tif:259: K-19	1606	1795	0.85	0.286	-0.234	-1.806	NaN	-1.573
260	110-UNSEP1.gel-no Vit 6.tif:260: K-20	1702	5610	0.901	0.894	-0.15	-0.162	NaN	-0.013
261	110-UNSEP1.gel-no Vit 6.tif:261: K-21	2364	1918	1.252	0.306	0.324	-1.71	NaN	-2.035
262	110-UNSEP1.gel-no Vit 6.tif:262: K-22	1623	1929	0.859	0.307	-0.219	-1.702	NaN	-1.485
263	110-UNSEP1.gel-no Vit 6.tif:263: K-23	2399	14756	1.27	2.351	0.345	1.234	-0.322	0.887
264	110-UNSEP1.gel-no Vit 6.tif:264: K-24	2067	16777	1.094	2.673	0.13	1.419	-0.387	1.287
265	110-UNSEP1.gel-no Vit 6.tif:265: L-1	1746	1377	0.925	0.219	-0.113	-2.188	NaN	-2.076
266	110-UNSEP1.gel-no Vit 6.tif:266: L-2	2014	7924	1.066	1.263	0.093	0.337	-0.17	0.242
267	110-UNSEP1.gel-no Vit 6.tif:267: L-3	2019	6226	1.069	0.992	0.096	-0.011	0.29	-0.109
268	110-UNSEP1.gel-no Vit 6.tif:268: L-4	1707	1447	0.904	0.231	-0.146	-2.117	NaN	-1.972
269	110-UNSEP1.gel-no Vit 6.tif:269: L-5	1693	1440	0.896	0.229	-0.158	-2.124	NaN	-1.967
270	110-UNSEP1.gel-no Vit 6.tif:270: L-6	1599	1480	0.847	0.236	-0.24	-2.084	NaN	-1.845
271	110-UNSEP1.gel-no Vit 6.tif:271: L-7	1621	1492	0.858	0.238	-0.22	-2.072	NaN	-1.853
272	110-UNSEP1.gel-no Vit 6.tif:272: L-8	2262	10514	1.198	1.675	0.26	0.745	-0.17	0.483
273	110-UNSEP1.gel-no Vit 6.tif:273: L-9	1614	1575	0.855	0.251	-0.227	-1.994	NaN	-1.769
274	110-UNSEP1.gel-no Vit 6.tif:274: L-10	1710	1557	0.905	0.248	-0.143	-2.011	NaN	-1.869
275	110-UNSEP1.gel-no Vit 6.tif:275: L-11	1648	1708	0.873	0.272	-0.197	-1.877	NaN	-1.682
276	110-UNSEP1.gel-no Vit 6.tif:276: L-12	1662	1608	0.88	0.256	-0.184	-1.964	NaN	-1.781
277	110-UNSEP1.gel-no Vit 6.tif:277: L-13	1594	1626	0.844	0.259	-0.245	-1.948	NaN	-1.705
278	110-UNSEP1.gel-no Vit 6.tif:278: L-14	1640	1752	0.868	0.279	-0.204	-1.841	NaN	-1.639
279	110-UNSEP1.gel-no Vit 6.tif:279: L-15	2077	12367	1.1	1.971	0.137	0.979	-0.241	0.84
280	110-UNSEP1.gel-no Vit 6.tif:280: L-16	2227	11518	1.179	1.835	0.238	0.876	0.193	0.637
281	110-UNSEP1.gel-no Vit 6.tif:281: L-17	1659	1736	0.878	0.277	-0.187	-1.854	NaN	-1.668
282	110-UNSEP1.gel-no Vit 6.tif:282: L-18	2334	13343	1.236	2.126	0.306	1.088	-0.379	0.781
283	110-UNSEP1.gel-no Vit 6.tif:283: L-19	1851	10305	0.98	1.642	-0.029	0.716	0.093	0.743
284	110-UNSEP1.gel-no Vit 6.tif:284: L-20	1603	1861	0.849	0.297	-0.237	-1.754	NaN	-1.519
285	110-UNSEP1.gel-no Vit 6.tif:285: L-21	2681	1892	1.42	0.301	0.505	-1.73	NaN	-2.237
286	110-UNSEP1.gel-no Vit 6.tif:286: L-22	1702	2276	0.901	0.363	-0.15	-1.463	NaN	-1.315
287	110-UNSEP1.gel-no Vit 6.tif:287: L-23	1599	2056	0.847	0.328	-0.24	-1.61	NaN	-1.371
288	110-UNSEP1.gel-no Vit 6.tif:288: L-24	3302	2064	1.748	0.329	0.806	-1.604	NaN	-2.412
289	110-UNSEP1.gel-no Vit 6.tif:289: M-1	1607	1369	0.851	0.218	-0.233	-2.197	NaN	-1.965
290	110-UNSEP1.gel-no Vit 6.tif:290: M-2	1741	1406	0.922	0.224	-0.117	-2.158	NaN	-2.042
291	110-UNSEP1.gel-no Vit 6.tif:291: M-3	1824	1424	0.966	0.227	-0.05	-2.14	NaN	-2.091
292	110-UNSEP1.gel-no Vit 6.tif:292: M-4	1900	8169	1.006	1.302	0.009	0.38	-0.17	0.37
293	110-UNSEP1.gel-no Vit 6.tif:293: M-5	1577	1428	0.835	0.228	-0.26	-2.136	NaN	-1.877
294	110-UNSEP1.gel-no Vit 6.tif:294: M-6	1833	8108	0.971	1.292	-0.043	0.37	0	0.411
295	110-UNSEP1.gel-no Vit 6.tif:295: M-7	2253	8824	1.193	1.406	0.255	0.492	-0.193	0.236
296	110-UNSEP1.gel-no Vit 6.tif:296: M-8	1840	5643	0.974	0.899	-0.038	-0.153	0.485	-0.117
297	110-UNSEP1.gel-no Vit 6.tif:297: M-9	1795	1562	0.95	0.249	-0.073	-2.006	NaN	-1.934
298	110-UNSEP1.gel-no Vit 6.tif:298: M-10	2015	8543	1.067	1.361	0.093	0.445	0.628	0.35
299	110-UNSEP1.gel-no Vit 6.tif:299: M-11	1731	1944	0.917	0.31	-0.126	-1.691	NaN	-1.566
300	110-UNSEP1.gel-no Vit 6.tif:300: M-12	1603	1598	0.849	0.255	-0.237	-1.973	NaN	-1.738
301	110-UNSEP1.gel-no Vit 6.tif:301: M-13	1594	1958	0.844	0.312	-0.245	-1.68	NaN	-1.437
302	110-UNSEP1.gel-no Vit 6.tif:302: M-14	2280	10934	1.207	1.742	0.272	0.801	0	0.528
303	110-UNSEP1.gel-no Vit 6.tif:303: M-15	2385	12182	1.263	1.941	0.337	0.957	-0.459	0.619
304	110-UNSEP1.gel-no Vit 6.tif:304: M-16	2330	12101	1.234	1.928	0.303	0.947	-0.263	0.643
305	110-UNSEP1.gel-no Vit 6.tif:305: M-17	1603	1711	0.849	0.273	-0.237	-1.875	NaN	-1.64
306	110-UNSEP1.gel-no Vit 6.tif:306: M-18	2005	11589	1.062	1.847	0.086	0.885	-0.206	0.797
307	110-UNSEP1.gel-no Vit 6.tif:307: M-19	2079	3625	1.101	0.578	0.139	-0.792	1.527	-0.932
308	110-UNSEP1.gel-no Vit 6.tif:308: M-20	2473	12658	1.309	2.017	0.389	1.012	-0.322	0.622
309	110-UNSEP1.gel-no Vit 6.tif:309: M-21	2431	13930	1.287	2.22	0.364	1.15	-0.263	0.785
310	110-UNSEP1.gel-no Vit 6.tif:310: M-22	2089	10326	1.106	1.645	0.146	0.719	-0.515	0.572
311	110-UNSEP1.gel-no Vit 6.tif:311: M-23	2173	14124	1.151	2.251	0.202	1.17	-0.1	0.967
312	110-UNSEP1.gel-no Vit 6.tif:312: M-24	2146	13103	1.136	2.088	0.184	1.062	-0.503	0.876
313	110-UNSEP1.gel-no Vit 6.tif:313: N-1	2613	4848	1.384	0.773	0.468	-0.372	0.807	-0.842
314	110-UNSEP1.gel-no Vit 6.tif:314: N-2	1893	7864	1.002	1.253	0.003	0.326	-0.222	0.321
315	110-UNSEP1.gel-no Vit 6.tif:315: N-3	1955	7534	1.035	1.201	0.05	0.264	0.138	0.212
316	110-UNSEP1.gel-no Vit 6.tif:316: N-4	1857	5336	0.983	0.85	-0.024	-0.234	1.059	-0.211
317	110-UNSEP1.gel-no Vit 6.tif:317: N-5	2037	8480	1.079	1.351	0.109	0.434	-0.193	0.324
318	110-UNSEP1.gel-no Vit 6.tif:318: N-6	2125	9096	1.125	1.449	0.17	0.536	0.152	0.364
319	110-UNSEP1.gel-no Vit 6.tif:319: N-7	2322	8657	1.229	1.38	0.298	0.464	0.379	0.165
320	110-UNSEP1.gel-no Vit 6.tif:320: N-8	1715	6261	0.908	0.998	-0.139	-0.003	0	0.134
321	110-UNSEP1.gel-no Vit 6.tif:321: N-9	2567	8881	1.359	1.415	0.443	0.501	0.585	0.057
322	110-UNSEP1.gel-no Vit 6.tif:322: N-10	1711	1585	0.906	0.253	-0.142	-1.985	NaN	-1.844
323	110-UNSEP1.gel-no Vit 6.tif:323: N-11	1619	1572	0.857	0.251	-0.222	-1.997	NaN	-1.776
324	110-UNSEP1.gel-no Vit 6.tif:324: N-12	2411	8907	1.277	1.419	0.352	0.505	-0.363	0.151
325	110-UNSEP1.gel-no Vit 6.tif:325: N-13	2406	9803	1.274	1.562	0.349	0.644	0.503	0.293
326	110-UNSEP1.gel-no Vit 6.tif:326: N-14	2235	12597	1.183	2.007	0.243	1.005	-0.459	0.761
327	110-UNSEP1.gel-no Vit 6.tif:327: N-15	2240	11284	1.186	1.798	0.246	0.847	-0.322	0.599
328	110-UNSEP1.gel-no Vit 6.tif:328: N-16	1577	1705	0.835	0.272	-0.26	-1.88	NaN	-1.621
329	110-UNSEP1.gel-no Vit 6.tif:329: N-17	1582	1708	0.838	0.272	-0.256	-1.877	NaN	-1.623
330	110-UNSEP1.gel-no Vit 6.tif:330: N-18	2990	15350	1.583	2.446	0.663	1.29	-0.138	0.626
331	110-UNSEP1.gel-no Vit 6.tif:331: N-19	2249	11624	1.191	1.852	0.252	0.889	-0.152	0.636
332	110-UNSEP1.gel-no Vit 6.tif:332: N-20	2346	12417	1.242	1.979	0.313	0.985	-0.585	0.67
333	110-UNSEP1.gel-no Vit 6.tif:333: N-21	1567	1872	0.83	0.298	-0.269	-1.745	NaN	-1.477
334	110-UNSEP1.gel-no Vit 6.tif:334: N-22	1596	1851	0.845	0.295	-0.243	-1.761	NaN	-1.52
335	110-UNSEP1.gel-no Vit 6.tif:335: N-23	1651	3127	0.874	0.498	-0.194	-1.005	NaN	-0.812
336	110-UNSEP1.gel-no Vit 6.tif:336: N-24	2273	15956	1.204	2.543	0.267	1.346	-0.585	1.078
337	111-UNSEP1.gel-no Vit 5.tif:1: A-1	2036	9046	1.062	1.754	0.086	0.81	-0.093	0.73
338	111-UNSEP1.gel-no Vit 5.tif:2: A-2	2373	10287	1.237	1.994	0.307	0.996	-0.222	0.695
339	111-UNSEP1.gel-no Vit 5.tif:3: A-3	3068	9578	1.6	1.857	0.678	0.893	0	0.221
340	111-UNSEP1.gel-no Vit 5.tif:4: A-4	2338	9878	1.219	1.915	0.286	0.937	-0.115	0.658
341	111-UNSEP1.gel-no Vit 5.tif:5: A-5	2193	9315	1.144	1.806	0.194	0.853	-0.115	0.665
342	111-UNSEP1.gel-no Vit 5.tif:6: A-6	2211	9239	1.153	1.791	0.205	0.841	-0.115	0.642
343	111-UNSEP1.gel-no Vit 5.tif:7: A-7	1917	1782	1	0.345	-0.0005016	-1.534	NaN	-1.527
344	111-UNSEP1.gel-no Vit 5.tif:8: A-8	1933	1803	1.008	0.35	0.011	-1.517	#NAME?	-1.522
345	111-UNSEP1.gel-no Vit 5.tif:9: A-9	1927	1883	1.005	0.365	0.007	-1.454	NaN	-1.455
346	111-UNSEP1.gel-no Vit 5.tif:10: A-10	1933	1858	1.008	0.36	0.011	-1.473	NaN	-1.479
347	111-UNSEP1.gel-no Vit 5.tif:11: A-11	2333	1879	1.217	0.364	0.283	-1.457	NaN	-1.734
348	111-UNSEP1.gel-no Vit 5.tif:12: A-12	1920	1895	1.001	0.367	0.002	-1.445	NaN	-1.44
349	111-UNSEP1.gel-no Vit 5.tif:13: A-13	1949	1911	1.016	0.37	0.023	-1.433	NaN	-1.45
350	111-UNSEP1.gel-no Vit 5.tif:14: A-14	1907	1939	0.994	0.376	-0.008	-1.412	NaN	-1.397
351	111-UNSEP1.gel-no Vit 5.tif:15: A-15	1898	2613	0.99	0.507	-0.015	-0.981	NaN	-0.96
352	111-UNSEP1.gel-no Vit 5.tif:16: A-16	1894	10031	0.988	1.944	-0.018	0.959	-0.3	0.984
353	111-UNSEP1.gel-no Vit 5.tif:17: A-17	1866	1997	0.973	0.387	-0.039	-1.369	NaN	-1.324
354	111-UNSEP1.gel-no Vit 5.tif:18: A-18	2244	13971	1.17	2.708	0.227	1.437	-0.28	1.217
355	111-UNSEP1.gel-no Vit 5.tif:19: A-19	2153	11806	1.123	2.289	0.167	1.194	0.087	1.034
356	111-UNSEP1.gel-no Vit 5.tif:20: A-20	2269	13385	1.183	2.595	0.243	1.376	0.087	1.139
357	111-UNSEP1.gel-no Vit 5.tif:21: A-21	2805	13420	1.463	2.601	0.549	1.379	-0.387	0.837
358	111-UNSEP1.gel-no Vit 5.tif:22: A-22	1812	2040	0.945	0.395	-0.082	-1.338	NaN	-1.25
359	111-UNSEP1.gel-no Vit 5.tif:23: A-23	2342	16919	1.221	3.28	0.288	1.714	-0.131	1.431
360	111-UNSEP1.gel-no Vit 5.tif:24: A-24	1862	2139	0.971	0.415	-0.042	-1.27	NaN	-1.221
361	111-UNSEP1.gel-no Vit 5.tif:25: B-1	1800	1525	0.939	0.296	-0.091	-1.758	NaN	-1.661
362	111-UNSEP1.gel-no Vit 5.tif:26: B-2	1786	1516	0.931	0.294	-0.103	-1.767	NaN	-1.658
363	111-UNSEP1.gel-no Vit 5.tif:27: B-3	1969	1931	1.027	0.374	0.038	-1.418	NaN	-1.45
364	111-UNSEP1.gel-no Vit 5.tif:28: B-4	2898	7260	1.511	1.407	0.596	0.493	0.7	-0.097
365	111-UNSEP1.gel-no Vit 5.tif:29: B-5	2374	8403	1.238	1.629	0.308	0.704	-0.093	0.402
366	111-UNSEP1.gel-no Vit 5.tif:30: B-6	2120	9575	1.106	1.856	0.145	0.892	-0.415	0.754
367	111-UNSEP1.gel-no Vit 5.tif:31: B-7	1822	1634	0.95	0.317	-0.074	-1.659	NaN	-1.579
368	111-UNSEP1.gel-no Vit 5.tif:32: B-8	1751	1663	0.913	0.322	-0.131	-1.633	NaN	-1.496
369	111-UNSEP1.gel-no Vit 5.tif:33: B-9	1759	1676	0.917	0.325	-0.125	-1.622	NaN	-1.491
370	111-UNSEP1.gel-no Vit 5.tif:34: B-10	2469	1694	1.288	0.328	0.365	-1.607	NaN	-1.965
371	111-UNSEP1.gel-no Vit 5.tif:35: B-11	2742	1705	1.43	0.331	0.516	-1.597	NaN	-2.107
372	111-UNSEP1.gel-no Vit 5.tif:36: B-12	2992	4554	1.56	0.883	0.642	-0.18	NaN	-0.815
373	111-UNSEP1.gel-no Vit 5.tif:37: B-13	1782	1748	0.929	0.339	-0.106	-1.561	NaN	-1.449
374	111-UNSEP1.gel-no Vit 5.tif:38: B-14	1739	1763	0.907	0.342	-0.141	-1.549	NaN	-1.402
375	111-UNSEP1.gel-no Vit 5.tif:39: B-15	1900	1764	0.991	0.342	-0.013	-1.548	NaN	-1.529
376	111-UNSEP1.gel-no Vit 5.tif:40: B-16	1735	1820	0.905	0.353	-0.144	-1.503	NaN	-1.352
377	111-UNSEP1.gel-no Vit 5.tif:41: B-17	1722	7996	0.898	1.55	-0.155	0.632	0	0.794
378	111-UNSEP1.gel-no Vit 5.tif:42: B-18	2617	3284	1.365	0.637	0.449	-0.652	NaN	-1.094
379	111-UNSEP1.gel-no Vit 5.tif:43: B-19	1692	1865	0.882	0.362	-0.181	-1.468	NaN	-1.281
380	111-UNSEP1.gel-no Vit 5.tif:44: B-20	2198	12421	1.146	2.408	0.197	1.268	0.241	1.077
381	111-UNSEP1.gel-no Vit 5.tif:45: B-21	1629	2119	0.849	0.411	-0.235	-1.284	NaN	-1.042
382	111-UNSEP1.gel-no Vit 5.tif:46: B-22	1614	1955	0.842	0.379	-0.249	-1.4	NaN	-1.145
383	111-UNSEP1.gel-no Vit 5.tif:47: B-23	3539	2042	1.845	0.396	0.884	-1.337	NaN	-2.215
384	111-UNSEP1.gel-no Vit 5.tif:48: B-24	2020	15325	1.053	2.971	0.075	1.571	-0.17	1.502
385	111-UNSEP1.gel-no Vit 5.tif:49: C-1	2845	9392	1.484	1.821	0.569	0.864	-0.193	0.302
386	111-UNSEP1.gel-no Vit 5.tif:50: C-2	3680	1532	1.919	0.297	0.94	-1.752	NaN	-2.686
387	111-UNSEP1.gel-no Vit 5.tif:51: C-3	1858	1516	0.969	0.294	-0.046	-1.767	NaN	-1.715
388	111-UNSEP1.gel-no Vit 5.tif:52: C-4	2144	5553	1.118	1.076	0.161	0.106	0.848	-0.048
389	111-UNSEP1.gel-no Vit 5.tif:53: C-5	1810	1680	0.944	0.326	-0.083	-1.619	NaN	-1.529
390	111-UNSEP1.gel-no Vit 5.tif:54: C-6	1723	1614	0.898	0.313	-0.154	-1.676	NaN	-1.516
391	111-UNSEP1.gel-no Vit 5.tif:55: C-7	2269	10117	1.183	1.961	0.243	0.972	0	0.735
392	111-UNSEP1.gel-no Vit 5.tif:56: C-8	1797	1651	0.937	0.32	-0.094	-1.644	NaN	-1.544
393	111-UNSEP1.gel-no Vit 5.tif:57: C-9	1929	1662	1.006	0.322	0.009	-1.634	NaN	-1.636
394	111-UNSEP1.gel-no Vit 5.tif:58: C-10	1757	1859	0.916	0.36	-0.126	-1.472	NaN	-1.34
395	111-UNSEP1.gel-no Vit 5.tif:59: C-11	1746	2039	0.91	0.395	-0.135	-1.339	NaN	-1.198
396	111-UNSEP1.gel-no Vit 5.tif:60: C-12	1890	2062	0.986	0.4	-0.021	-1.323	NaN	-1.296
397	111-UNSEP1.gel-no Vit 5.tif:61: C-13	9594	2044	5.003	0.396	2.323	-1.336	NaN	-3.652
398	111-UNSEP1.gel-no Vit 5.tif:62: C-14	1836	1739	0.957	0.337	-0.063	-1.569	NaN	-1.5
399	111-UNSEP1.gel-no Vit 5.tif:63: C-15	1886	1794	0.983	0.348	-0.024	-1.524	NaN	-1.494
400	111-UNSEP1.gel-no Vit 5.tif:64: C-16	1674	8095	0.873	1.569	-0.196	0.65	0.078	0.852
401	111-UNSEP1.gel-no Vit 5.tif:65: C-17	2176	12960	1.135	2.512	0.182	1.329	-0.263	1.153
402	111-UNSEP1.gel-no Vit 5.tif:66: C-18	2062	12002	1.075	2.327	0.105	1.218	-0.115	1.12
403	111-UNSEP1.gel-no Vit 5.tif:67: C-19	2053	1895	1.071	0.367	0.098	-1.445	NaN	-1.537
404	111-UNSEP1.gel-no Vit 5.tif:68: C-20	1616	2701	0.843	0.524	-0.247	-0.934	NaN	-0.68
405	111-UNSEP1.gel-no Vit 5.tif:69: C-21	1943	10907	1.013	2.114	0.019	1.08	0.093	1.067
406	111-UNSEP1.gel-no Vit 5.tif:70: C-22	1630	1911	0.85	0.37	-0.234	-1.433	NaN	-1.192
407	111-UNSEP1.gel-no Vit 5.tif:71: C-23	1820	13334	0.949	2.585	-0.075	1.37	0.248	1.452
408	111-UNSEP1.gel-no Vit 5.tif:72: C-24	1772	12479	0.924	2.419	-0.114	1.274	-0.387	1.395
409	111-UNSEP1.gel-no Vit 5.tif:73: D-1	2103	1635	1.097	0.317	0.133	-1.658	NaN	-1.785
410	111-UNSEP1.gel-no Vit 5.tif:74: D-2	1924	5016	1.003	0.972	0.005	-0.04	0.954	-0.039
411	111-UNSEP1.gel-no Vit 5.tif:75: D-3	2164	10474	1.128	2.03	0.174	1.022	0	0.854
412	111-UNSEP1.gel-no Vit 5.tif:76: D-4	2012	1623	1.049	0.315	0.069	-1.668	NaN	-1.731
413	111-UNSEP1.gel-no Vit 5.tif:77: D-5	1826	1632	0.952	0.316	-0.071	-1.66	NaN	-1.583
414	111-UNSEP1.gel-no Vit 5.tif:78: D-6	2162	8491	1.127	1.646	0.173	0.719	0	0.552
415	111-UNSEP1.gel-no Vit 5.tif:79: D-7	1973	10236	1.029	1.984	0.041	0.989	-0.29	0.954
416	111-UNSEP1.gel-no Vit 5.tif:80: D-8	1828	1686	0.953	0.327	-0.069	-1.613	NaN	-1.538
417	111-UNSEP1.gel-no Vit 5.tif:81: D-9	1749	1717	0.912	0.333	-0.133	-1.587	NaN	-1.448
418	111-UNSEP1.gel-no Vit 5.tif:82: D-10	1790	1662	0.933	0.322	-0.099	-1.634	NaN	-1.528
419	111-UNSEP1.gel-no Vit 5.tif:83: D-11	1813	1780	0.945	0.345	-0.081	-1.535	NaN	-1.448
420	111-UNSEP1.gel-no Vit 5.tif:84: D-12	1710	1939	0.892	0.376	-0.165	-1.412	NaN	-1.24
421	111-UNSEP1.gel-no Vit 5.tif:85: D-13	1816	2338	0.947	0.453	-0.079	-1.142	NaN	-1.057
422	111-UNSEP1.gel-no Vit 5.tif:86: D-14	2205	2102	1.15	0.407	0.201	-1.295	NaN	-1.49
423	111-UNSEP1.gel-no Vit 5.tif:87: D-15	1742	1961	0.908	0.38	-0.139	-1.395	NaN	-1.251
424	111-UNSEP1.gel-no Vit 5.tif:88: D-16	2107	11993	1.099	2.325	0.136	1.217	-0.152	1.088
425	111-UNSEP1.gel-no Vit 5.tif:89: D-17	2270	13231	1.184	2.565	0.243	1.359	-0.348	1.122
426	111-UNSEP1.gel-no Vit 5.tif:90: D-18	1925	10118	1.004	1.961	0.006	0.972	0.628	0.973
427	111-UNSEP1.gel-no Vit 5.tif:91: D-19	1966	12598	1.025	2.442	0.036	1.288	-0.348	1.258
428	111-UNSEP1.gel-no Vit 5.tif:92: D-20	1656	1815	0.864	0.352	-0.212	-1.507	NaN	-1.289
429	111-UNSEP1.gel-no Vit 5.tif:93: D-21	1700	8111	0.886	1.572	-0.174	0.653	1.974	0.833
430	111-UNSEP1.gel-no Vit 5.tif:94: D-22	1822	13235	0.95	2.566	-0.074	1.359	0	1.439
431	111-UNSEP1.gel-no Vit 5.tif:95: D-23	1815	10659	0.946	2.066	-0.079	1.047	0.644	1.133
432	111-UNSEP1.gel-no Vit 5.tif:96: D-24	1860	12834	0.97	2.488	-0.044	1.315	1.263	1.365
433	111-UNSEP1.gel-no Vit 5.tif:97: E-1	1924	1511	1.003	0.293	0.005	-1.771	NaN	-1.77
434	111-UNSEP1.gel-no Vit 5.tif:98: E-2	2740	9008	1.429	1.746	0.515	0.804	0.093	0.296
435	111-UNSEP1.gel-no Vit 5.tif:99: E-3	2061	7795	1.075	1.511	0.104	0.596	0.263	0.498
436	111-UNSEP1.gel-no Vit 5.tif:100: E-4	1818	1809	0.948	0.351	-0.077	-1.512	NaN	-1.429
437	111-UNSEP1.gel-no Vit 5.tif:101: E-5	2406	9206	1.255	1.785	0.327	0.836	0.152	0.515
438	111-UNSEP1.gel-no Vit 5.tif:102: E-6	1768	1644	0.922	0.319	-0.117	-1.65	NaN	-1.526
439	111-UNSEP1.gel-no Vit 5.tif:103: E-7	2132	6205	1.112	1.203	0.153	0.266	0.396	0.12
440	111-UNSEP1.gel-no Vit 5.tif:104: E-8	1802	8784	0.94	1.703	-0.09	0.768	0.29	0.864
441	111-UNSEP1.gel-no Vit 5.tif:105: E-9	1869	9126	0.975	1.769	-0.037	0.823	-0.152	0.866
442	111-UNSEP1.gel-no Vit 5.tif:106: E-10	2166	8836	1.129	1.713	0.176	0.776	0.678	0.607
443	111-UNSEP1.gel-no Vit 5.tif:107: E-11	1790	1687	0.933	0.327	-0.099	-1.613	NaN	-1.507
444	111-UNSEP1.gel-no Vit 5.tif:108: E-12	2220	9874	1.158	1.914	0.211	0.937	0.181	0.732
445	111-UNSEP1.gel-no Vit 5.tif:109: E-13	2332	10395	1.216	2.015	0.282	1.011	-0.363	0.735
446	111-UNSEP1.gel-no Vit 5.tif:110: E-14	1884	1779	0.982	0.345	-0.026	-1.536	NaN	-1.504
447	111-UNSEP1.gel-no Vit 5.tif:111: E-15	1684	1810	0.878	0.351	-0.187	-1.511	NaN	-1.317
448	111-UNSEP1.gel-no Vit 5.tif:112: E-16	1698	1983	0.885	0.384	-0.176	-1.379	NaN	-1.198
449	111-UNSEP1.gel-no Vit 5.tif:113: E-17	1659	1965	0.865	0.381	-0.209	-1.392	NaN	-1.177
450	111-UNSEP1.gel-no Vit 5.tif:114: E-18	1783	9556	0.93	1.852	-0.105	0.889	0.138	1.001
451	111-UNSEP1.gel-no Vit 5.tif:115: E-19	1877	7605	0.979	1.474	-0.031	0.56	0.263	0.597
452	111-UNSEP1.gel-no Vit 5.tif:116: E-20	1607	1841	0.838	0.357	-0.255	-1.487	NaN	-1.225
453	111-UNSEP1.gel-no Vit 5.tif:117: E-21	1880	11703	0.98	2.269	-0.029	1.182	0.322	1.217
454	111-UNSEP1.gel-no Vit 5.tif:118: E-22	1664	1897	0.868	0.368	-0.205	-1.443	NaN	-1.232
455	111-UNSEP1.gel-no Vit 5.tif:119: E-23	1580	1841	0.824	0.357	-0.279	-1.487	NaN	-1.201
456	111-UNSEP1.gel-no Vit 5.tif:120: E-24	1808	13754	0.943	2.666	-0.085	1.415	-0.193	1.506
457	111-UNSEP1.gel-no Vit 5.tif:121: F-1	2362	8654	1.232	1.678	0.301	0.746	0	0.452
458	111-UNSEP1.gel-no Vit 5.tif:122: F-2	1753	1521	0.914	0.295	-0.13	-1.762	NaN	-1.626
459	111-UNSEP1.gel-no Vit 5.tif:123: F-3	1966	1631	1.025	0.316	0.036	-1.661	NaN	-1.691
460	111-UNSEP1.gel-no Vit 5.tif:124: F-4	2445	9000	1.275	1.745	0.35	0.803	-0.138	0.459
461	111-UNSEP1.gel-no Vit 5.tif:125: F-5	1808	1596	0.943	0.309	-0.085	-1.693	NaN	-1.601
462	111-UNSEP1.gel-no Vit 5.tif:126: F-6	1805	2243	0.941	0.435	-0.087	-1.202	NaN	-1.108
463	111-UNSEP1.gel-no Vit 5.tif:127: F-7	1749	1645	0.912	0.319	-0.133	-1.649	NaN	-1.51
464	111-UNSEP1.gel-no Vit 5.tif:128: F-8	2238	9712	1.167	1.883	0.223	0.913	-0.241	0.696
465	111-UNSEP1.gel-no Vit 5.tif:129: F-9	1720	1686	0.897	0.327	-0.157	-1.613	NaN	-1.45
466	111-UNSEP1.gel-no Vit 5.tif:130: F-10	1707	2076	0.89	0.402	-0.168	-1.313	NaN	-1.139
467	111-UNSEP1.gel-no Vit 5.tif:131: F-11	1728	1661	0.901	0.322	-0.15	-1.635	NaN	-1.478
468	111-UNSEP1.gel-no Vit 5.tif:132: F-12	1877	1772	0.979	0.343	-0.031	-1.542	NaN	-1.504
469	111-UNSEP1.gel-no Vit 5.tif:133: F-13	1862	1873	0.971	0.363	-0.042	-1.462	NaN	-1.413
470	111-UNSEP1.gel-no Vit 5.tif:134: F-14	1713	1730	0.893	0.335	-0.163	-1.576	NaN	-1.407
471	111-UNSEP1.gel-no Vit 5.tif:135: F-15	1998	9577	1.042	1.856	0.059	0.893	-0.193	0.84
472	111-UNSEP1.gel-no Vit 5.tif:136: F-16	1707	2125	0.89	0.412	-0.168	-1.28	NaN	-1.105
473	111-UNSEP1.gel-no Vit 5.tif:137: F-17	1661	2286	0.866	0.443	-0.207	-1.174	NaN	-0.961
474	111-UNSEP1.gel-no Vit 5.tif:138: F-18	2176	10309	1.135	1.998	0.182	0.999	-0.379	0.823
475	111-UNSEP1.gel-no Vit 5.tif:139: F-19	1641	5737	0.856	1.112	-0.225	0.153	0.617	0.384
476	111-UNSEP1.gel-no Vit 5.tif:140: F-20	1618	1817	0.844	0.352	-0.245	-1.505	NaN	-1.254
477	111-UNSEP1.gel-no Vit 5.tif:141: F-21	1896	12338	0.989	2.392	-0.016	1.258	0	1.281
478	111-UNSEP1.gel-no Vit 5.tif:142: F-22	1605	2643	0.837	0.512	-0.257	-0.965	NaN	-0.702
479	111-UNSEP1.gel-no Vit 5.tif:143: F-23	2339	1850	1.22	0.359	0.287	-1.479	NaN	-1.76
480	111-UNSEP1.gel-no Vit 5.tif:144: F-24	1758	14106	0.917	2.734	-0.125	1.451	0	1.583
481	111-UNSEP1.gel-no Vit 5.tif:145: G-1	1992	1514	1.039	0.293	0.055	-1.769	NaN	-1.817
482	111-UNSEP1.gel-no Vit 5.tif:146: G-2	1964	1518	1.024	0.294	0.034	-1.765	NaN	-1.793
483	111-UNSEP1.gel-no Vit 5.tif:147: G-3	1849	1518	0.964	0.294	-0.053	-1.765	NaN	-1.706
484	111-UNSEP1.gel-no Vit 5.tif:148: G-4	1752	1519	0.914	0.294	-0.13	-1.764	NaN	-1.627
485	111-UNSEP1.gel-no Vit 5.tif:149: G-5	1803	6174	0.94	1.197	-0.089	0.259	0	0.354
486	111-UNSEP1.gel-no Vit 5.tif:150: G-6	2096	8456	1.093	1.639	0.128	0.713	-0.152	0.591
487	111-UNSEP1.gel-no Vit 5.tif:151: G-7	1892	1594	0.987	0.309	-0.019	-1.694	NaN	-1.669
488	111-UNSEP1.gel-no Vit 5.tif:152: G-8	1836	1635	0.957	0.317	-0.063	-1.658	NaN	-1.589
489	111-UNSEP1.gel-no Vit 5.tif:153: G-9	1722	1968	0.898	0.381	-0.155	-1.39	NaN	-1.229
490	111-UNSEP1.gel-no Vit 5.tif:154: G-10	1973	1764	1.029	0.342	0.041	-1.548	NaN	-1.583
491	111-UNSEP1.gel-no Vit 5.tif:155: G-11	1728	1898	0.901	0.368	-0.15	-1.443	NaN	-1.286
492	111-UNSEP1.gel-no Vit 5.tif:156: G-12	2113	8395	1.102	1.627	0.14	0.703	-0.415	0.569
493	111-UNSEP1.gel-no Vit 5.tif:157: G-13	2099	9511	1.095	1.844	0.13	0.883	0	0.758
494	111-UNSEP1.gel-no Vit 5.tif:158: G-14	3225	9131	1.682	1.77	0.75	0.824	0.29	0.08
495	111-UNSEP1.gel-no Vit 5.tif:159: G-15	1903	11726	0.992	2.273	-0.011	1.185	-0.206	1.202
496	111-UNSEP1.gel-no Vit 5.tif:160: G-16	1964	1858	1.024	0.36	0.034	-1.473	NaN	-1.501
497	111-UNSEP1.gel-no Vit 5.tif:161: G-17	1768	8912	0.922	1.728	-0.117	0.789	0	0.912
498	111-UNSEP1.gel-no Vit 5.tif:162: G-18	1925	1799	1.004	0.349	0.006	-1.52	NaN	-1.519
499	111-UNSEP1.gel-no Vit 5.tif:163: G-19	1677	1931	0.875	0.374	-0.193	-1.418	NaN	-1.218
500	111-UNSEP1.gel-no Vit 5.tif:164: G-20	1774	6659	0.925	1.291	-0.112	0.368	0.28	0.487
501	111-UNSEP1.gel-no Vit 5.tif:165: G-21	1723	3505	0.898	0.679	-0.154	-0.558	1.7	-0.397
502	111-UNSEP1.gel-no Vit 5.tif:166: G-22	1722	10212	0.898	1.98	-0.155	0.985	0.415	1.147
503	111-UNSEP1.gel-no Vit 5.tif:167: G-23	1572	1913	0.82	0.371	-0.287	-1.431	NaN	-1.138
504	111-UNSEP1.gel-no Vit 5.tif:168: G-24	1874	2637	0.977	0.511	-0.033	-0.968	NaN	-0.929
505	111-UNSEP1.gel-no Vit 5.tif:169: H-1	2230	8149	1.163	1.58	0.218	0.66	0.115	0.448
506	111-UNSEP1.gel-no Vit 5.tif:170: H-2	1824	1493	0.951	0.289	-0.072	-1.789	NaN	-1.71
507	111-UNSEP1.gel-no Vit 5.tif:171: H-3	2289	9497	1.194	1.841	0.255	0.88	0	0.631
508	111-UNSEP1.gel-no Vit 5.tif:172: H-4	1790	1528	0.933	0.296	-0.099	-1.755	NaN	-1.65
509	111-UNSEP1.gel-no Vit 5.tif:173: H-5	2248	8586	1.172	1.664	0.229	0.735	-0.193	0.512
510	111-UNSEP1.gel-no Vit 5.tif:174: H-6	1772	5194	0.924	1.007	-0.114	0.01	0.807	0.13
511	111-UNSEP1.gel-no Vit 5.tif:175: H-7	2276	7457	1.187	1.446	0.247	0.532	-0.263	0.291
512	111-UNSEP1.gel-no Vit 5.tif:176: H-8	2181	10269	1.137	1.991	0.186	0.993	-0.138	0.814
513	111-UNSEP1.gel-no Vit 5.tif:177: H-9	1741	1684	0.908	0.326	-0.139	-1.615	NaN	-1.469
514	111-UNSEP1.gel-no Vit 5.tif:178: H-10	2297	9503	1.198	1.842	0.26	0.881	-0.1	0.627
515	111-UNSEP1.gel-no Vit 5.tif:179: H-11	1844	6999	0.962	1.357	-0.057	0.44	0.28	0.503
516	111-UNSEP1.gel-no Vit 5.tif:180: H-12	1881	8283	0.981	1.606	-0.028	0.683	-0.193	0.717
517	111-UNSEP1.gel-no Vit 5.tif:181: H-13	1994	8886	1.04	1.723	0.056	0.785	0	0.734
518	111-UNSEP1.gel-no Vit 5.tif:182: H-14	1702	1706	0.888	0.331	-0.172	-1.596	NaN	-1.418
519	111-UNSEP1.gel-no Vit 5.tif:183: H-15	1720	1756	0.897	0.34	-0.157	-1.555	NaN	-1.392
520	111-UNSEP1.gel-no Vit 5.tif:184: H-16	2160	10194	1.126	1.976	0.172	0.983	-0.138	0.817
521	111-UNSEP1.gel-no Vit 5.tif:185: H-17	2234	7714	1.165	1.495	0.22	0.58	-0.585	0.366
522	111-UNSEP1.gel-no Vit 5.tif:186: H-18	2014	10062	1.05	1.951	0.071	0.964	0	0.899
523	111-UNSEP1.gel-no Vit 5.tif:187: H-19	2335	11848	1.218	2.297	0.284	1.2	0	0.922
524	111-UNSEP1.gel-no Vit 5.tif:188: H-20	1974	6534	1.029	1.267	0.042	0.341	-0.222	0.305
525	111-UNSEP1.gel-no Vit 5.tif:189: H-21	1753	11205	0.914	2.172	-0.13	1.119	-0.737	1.255
526	111-UNSEP1.gel-no Vit 5.tif:190: H-22	1840	5613	0.959	1.088	-0.06	0.122	0	0.188
527	111-UNSEP1.gel-no Vit 5.tif:191: H-23	1800	11614	0.939	2.251	-0.091	1.171	0.441	1.268
528	111-UNSEP1.gel-no Vit 5.tif:192: H-24	1641	1885	0.856	0.365	-0.225	-1.452	NaN	-1.221
529	111-UNSEP1.gel-no Vit 5.tif:193: I-1	2441	8304	1.273	1.61	0.348	0.687	-0.126	0.345
530	111-UNSEP1.gel-no Vit 5.tif:194: I-2	1843	1516	0.961	0.294	-0.057	-1.767	NaN	-1.703
531	111-UNSEP1.gel-no Vit 5.tif:195: I-3	1831	1514	0.955	0.293	-0.067	-1.769	NaN	-1.696
532	111-UNSEP1.gel-no Vit 5.tif:196: I-4	2048	7835	1.068	1.519	0.095	0.603	0	0.514
533	111-UNSEP1.gel-no Vit 5.tif:197: I-5	1761	1574	0.918	0.305	-0.123	-1.713	NaN	-1.583
534	111-UNSEP1.gel-no Vit 5.tif:198: I-6	1724	1575	0.899	0.305	-0.154	-1.712	NaN	-1.552
535	111-UNSEP1.gel-no Vit 5.tif:199: I-7	1733	1765	0.904	0.342	-0.146	-1.547	NaN	-1.395
536	111-UNSEP1.gel-no Vit 5.tif:200: I-8	2280	6108	1.189	1.184	0.25	0.244	-0.585	0.0002433
537	111-UNSEP1.gel-no Vit 5.tif:201: I-9	2187	9492	1.14	1.84	0.19	0.88	0.322	0.696
538	111-UNSEP1.gel-no Vit 5.tif:202: I-10	2928	10623	1.527	2.059	0.611	1.042	0.585	0.438
539	111-UNSEP1.gel-no Vit 5.tif:203: I-11	3951	1858	2.06	0.36	1.043	-1.473	NaN	-2.51
540	111-UNSEP1.gel-no Vit 5.tif:204: I-12	2539	1722	1.324	0.334	0.405	-1.583	NaN	-1.982
541	111-UNSEP1.gel-no Vit 5.tif:205: I-13	1766	1736	0.921	0.337	-0.119	-1.571	NaN	-1.446
542	111-UNSEP1.gel-no Vit 5.tif:206: I-14	2225	10813	1.16	2.096	0.214	1.068	0.138	0.859
543	111-UNSEP1.gel-no Vit 5.tif:207: I-15	1962	7829	1.023	1.518	0.033	0.602	0	0.575
544	111-UNSEP1.gel-no Vit 5.tif:208: I-16	2271	11784	1.184	2.284	0.244	1.192	-0.29	0.954
545	111-UNSEP1.gel-no Vit 5.tif:209: I-17	1738	7269	0.906	1.409	-0.142	0.495	0	0.643
546	111-UNSEP1.gel-no Vit 5.tif:210: I-18	1856	2484	0.968	0.482	-0.047	-1.054	1.485	-1.001
547	111-UNSEP1.gel-no Vit 5.tif:211: I-19	2033	6425	1.06	1.245	0.084	0.317	-0.193	0.239
548	111-UNSEP1.gel-no Vit 5.tif:212: I-20	1673	7845	0.872	1.521	-0.197	0.605	0.807	0.808
549	111-UNSEP1.gel-no Vit 5.tif:213: I-21	1757	9849	0.916	1.909	-0.126	0.933	0.29	1.065
550	111-UNSEP1.gel-no Vit 5.tif:214: I-22	1931	12627	1.007	2.448	0.01	1.291	0	1.288
551	111-UNSEP1.gel-no Vit 5.tif:215: I-23	1766	10706	0.921	2.075	-0.119	1.053	0	1.178
552	111-UNSEP1.gel-no Vit 5.tif:216: I-24	1894	7276	0.988	1.41	-0.018	0.496	0.737	0.52
553	111-UNSEP1.gel-no Vit 5.tif:217: J-1	2173	8164	1.133	1.583	0.18	0.662	0	0.488
554	111-UNSEP1.gel-no Vit 5.tif:218: J-2	1886	6752	0.983	1.309	-0.024	0.388	0	0.419
555	111-UNSEP1.gel-no Vit 5.tif:219: J-3	2197	7738	1.146	1.5	0.196	0.585	0	0.395
556	111-UNSEP1.gel-no Vit 5.tif:220: J-4	2435	7312	1.27	1.417	0.345	0.503	-0.222	0.165
557	111-UNSEP1.gel-no Vit 5.tif:221: J-5	2136	1541	1.114	0.299	0.156	-1.743	NaN	-1.892
558	111-UNSEP1.gel-no Vit 5.tif:222: J-6	2596	7506	1.354	1.455	0.437	0.541	-0.222	0.11
559	111-UNSEP1.gel-no Vit 5.tif:223: J-7	2095	8308	1.092	1.61	0.128	0.688	0	0.566
560	111-UNSEP1.gel-no Vit 5.tif:224: J-8	1870	1668	0.975	0.323	-0.036	-1.629	NaN	-1.586
561	111-UNSEP1.gel-no Vit 5.tif:225: J-9	2340	6427	1.22	1.246	0.287	0.317	1.17	0.036
562	111-UNSEP1.gel-no Vit 5.tif:226: J-10	2010	3740	1.048	0.725	0.068	-0.464	0.72	-0.526
563	111-UNSEP1.gel-no Vit 5.tif:227: J-11	2080	5968	1.085	1.157	0.117	0.21	-0.263	0.099
564	111-UNSEP1.gel-no Vit 5.tif:228: J-12	2030	8419	1.059	1.632	0.082	0.707	-0.222	0.631
565	111-UNSEP1.gel-no Vit 5.tif:229: J-13	2335	3007	1.218	0.583	0.284	-0.779	#NAME?	-1.057
566	111-UNSEP1.gel-no Vit 5.tif:230: J-14	2280	7919	1.189	1.535	0.25	0.618	0.678	0.375
567	111-UNSEP1.gel-no Vit 5.tif:231: J-15	1874	1749	0.977	0.339	-0.033	-1.56	NaN	-1.521
568	111-UNSEP1.gel-no Vit 5.tif:232: J-16	1725	1774	0.9	0.344	-0.153	-1.54	NaN	-1.381
569	111-UNSEP1.gel-no Vit 5.tif:233: J-17	1931	1735	1.007	0.336	0.01	-1.572	NaN	-1.576
570	111-UNSEP1.gel-no Vit 5.tif:234: J-18	2057	12965	1.073	2.513	0.101	1.33	-0.152	1.235
571	111-UNSEP1.gel-no Vit 5.tif:235: J-19	1731	10071	0.903	1.952	-0.148	0.965	0	1.119
572	111-UNSEP1.gel-no Vit 5.tif:236: J-20	1843	7388	0.961	1.432	-0.057	0.518	0	0.582
573	111-UNSEP1.gel-no Vit 5.tif:237: J-21	2014	7474	1.05	1.449	0.071	0.535	0.193	0.47
574	111-UNSEP1.gel-no Vit 5.tif:238: J-22	1651	10510	0.861	2.037	-0.216	1.027	0.138	1.249
575	111-UNSEP1.gel-no Vit 5.tif:239: J-23	1980	12767	1.033	2.475	0.046	1.307	-0.29	1.267
576	111-UNSEP1.gel-no Vit 5.tif:240: J-24	1950	13894	1.017	2.693	0.024	1.429	-0.637	1.411
577	111-UNSEP1.gel-no Vit 5.tif:241: K-1	2212	6964	1.153	1.35	0.206	0.433	0	0.233
578	111-UNSEP1.gel-no Vit 5.tif:242: K-2	2024	5149	1.055	0.998	0.078	-0.003	-0.222	-0.074
579	111-UNSEP1.gel-no Vit 5.tif:243: K-3	2217	8147	1.156	1.579	0.209	0.659	0.152	0.456
580	111-UNSEP1.gel-no Vit 5.tif:244: K-4	2103	7184	1.097	1.393	0.133	0.478	0	0.351
581	111-UNSEP1.gel-no Vit 5.tif:245: K-5	1744	1576	0.909	0.306	-0.137	-1.711	NaN	-1.568
582	111-UNSEP1.gel-no Vit 5.tif:246: K-6	2523	6933	1.316	1.344	0.396	0.426	-0.485	0.037
583	111-UNSEP1.gel-no Vit 5.tif:247: K-7	2373	7056	1.237	1.368	0.307	0.452	-0.485	0.151
584	111-UNSEP1.gel-no Vit 5.tif:248: K-8	2166	7052	1.129	1.367	0.176	0.451	1.441	0.282
585	111-UNSEP1.gel-no Vit 5.tif:249: K-9	2106	5023	1.098	0.974	0.135	-0.038	-0.263	-0.167
586	111-UNSEP1.gel-no Vit 5.tif:250: K-10	2155	9892	1.124	1.918	0.168	0.939	0.322	0.777
587	111-UNSEP1.gel-no Vit 5.tif:251: K-11	3274	8958	1.707	1.736	0.772	0.796	0	0.031
588	111-UNSEP1.gel-no Vit 5.tif:252: K-12	2067	6901	1.078	1.338	0.108	0.42	0.737	0.318
589	111-UNSEP1.gel-no Vit 5.tif:253: K-13	1729	1668	0.902	0.323	-0.149	-1.629	NaN	-1.473
590	111-UNSEP1.gel-no Vit 5.tif:254: K-14	1944	7739	1.014	1.5	0.02	0.585	-0.152	0.572
591	111-UNSEP1.gel-no Vit 5.tif:255: K-15	2109	5311	1.1	1.03	0.137	0.042	-0.322	-0.089
592	111-UNSEP1.gel-no Vit 5.tif:256: K-16	1857	1728	0.968	0.335	-0.046	-1.578	NaN	-1.525
593	111-UNSEP1.gel-no Vit 5.tif:257: K-17	2027	9206	1.057	1.785	0.08	0.836	-0.415	0.762
594	111-UNSEP1.gel-no Vit 5.tif:258: K-18	1839	1758	0.959	0.341	-0.06	-1.553	NaN	-1.486
595	111-UNSEP1.gel-no Vit 5.tif:259: K-19	1821	1720	0.95	0.333	-0.075	-1.585	NaN	-1.504
596	111-UNSEP1.gel-no Vit 5.tif:260: K-20	2031	8680	1.059	1.683	0.083	0.751	0.83	0.674
597	111-UNSEP1.gel-no Vit 5.tif:261: K-21	2058	10902	1.073	2.113	0.102	1.08	-0.515	0.984
598	111-UNSEP1.gel-no Vit 5.tif:262: K-22	1641	10575	0.856	2.05	-0.225	1.036	-0.459	1.267
599	111-UNSEP1.gel-no Vit 5.tif:263: K-23	1976	11976	1.03	2.322	0.043	1.215	-0.459	1.178
600	111-UNSEP1.gel-no Vit 5.tif:264: K-24	2484	10677	1.295	2.07	0.373	1.049	0	0.682
601	111-UNSEP1.gel-no Vit 5.tif:265: L-1	2396	8642	1.249	1.675	0.321	0.744	-0.322	0.429
602	111-UNSEP1.gel-no Vit 5.tif:266: L-2	2061	7039	1.075	1.364	0.104	0.448	0.678	0.351
603	111-UNSEP1.gel-no Vit 5.tif:267: L-3	2394	6902	1.248	1.338	0.32	0.42	-0.222	0.106
604	111-UNSEP1.gel-no Vit 5.tif:268: L-4	2451	7455	1.278	1.445	0.354	0.531	0	0.183
605	111-UNSEP1.gel-no Vit 5.tif:269: L-5	2587	5553	1.349	1.076	0.432	0.106	-0.585	-0.319
606	111-UNSEP1.gel-no Vit 5.tif:270: L-6	2135	6321	1.113	1.225	0.155	0.293	0.193	0.144
607	111-UNSEP1.gel-no Vit 5.tif:271: L-7	2295	5759	1.197	1.116	0.259	0.159	-0.485	-0.094
608	111-UNSEP1.gel-no Vit 5.tif:272: L-8	2028	7676	1.058	1.488	0.081	0.573	-0.222	0.499
609	111-UNSEP1.gel-no Vit 5.tif:273: L-9	2355	6625	1.228	1.284	0.296	0.361	-0.222	0.071
610	111-UNSEP1.gel-no Vit 5.tif:274: L-10	2158	7464	1.125	1.447	0.17	0.533	0.515	0.369
611	111-UNSEP1.gel-no Vit 5.tif:275: L-11	1810	1665	0.944	0.323	-0.083	-1.631	NaN	-1.542
612	111-UNSEP1.gel-no Vit 5.tif:276: L-12	1950	6255	1.017	1.213	0.024	0.278	0.807	0.26
613	111-UNSEP1.gel-no Vit 5.tif:277: L-13	2227	5677	1.161	1.1	0.216	0.138	-0.263	-0.071
614	111-UNSEP1.gel-no Vit 5.tif:278: L-14	2370	7515	1.236	1.457	0.306	0.543	-0.263	0.243
615	111-UNSEP1.gel-no Vit 5.tif:279: L-15	2185	11885	1.139	2.304	0.188	1.204	0.322	1.022
616	111-UNSEP1.gel-no Vit 5.tif:280: L-16	1696	4458	0.884	0.864	-0.177	-0.211	1.158	-0.027
617	111-UNSEP1.gel-no Vit 5.tif:281: L-17	2114	7290	1.102	1.413	0.141	0.499	0.515	0.365
618	111-UNSEP1.gel-no Vit 5.tif:282: L-18	1646	1741	0.858	0.337	-0.22	-1.567	NaN	-1.34
619	111-UNSEP1.gel-no Vit 5.tif:283: L-19	1700	1792	0.886	0.347	-0.174	-1.525	NaN	-1.345
620	111-UNSEP1.gel-no Vit 5.tif:284: L-20	1732	7911	0.903	1.534	-0.147	0.617	-0.193	0.77
621	111-UNSEP1.gel-no Vit 5.tif:285: L-21	2134	9671	1.113	1.875	0.154	0.907	-0.585	0.759
622	111-UNSEP1.gel-no Vit 5.tif:286: L-22	1979	10376	1.032	2.011	0.045	1.008	-0.515	0.969
623	111-UNSEP1.gel-no Vit 5.tif:287: L-23	2183	11047	1.138	2.141	0.187	1.099	-0.531	0.918
624	111-UNSEP1.gel-no Vit 5.tif:288: L-24	1626	1781	0.848	0.345	-0.238	-1.534	NaN	-1.29
625	111-UNSEP1.gel-no Vit 5.tif:289: M-1	2023	5094	1.055	0.987	0.077	-0.018	0.778	-0.089
626	111-UNSEP1.gel-no Vit 5.tif:290: M-2	2323	6886	1.211	1.335	0.277	0.417	-0.193	0.146
627	111-UNSEP1.gel-no Vit 5.tif:291: M-3	2335	6454	1.218	1.251	0.284	0.323	0	0.045
628	111-UNSEP1.gel-no Vit 5.tif:292: M-4	2011	5478	1.049	1.062	0.069	0.087	0.83	0.024
629	111-UNSEP1.gel-no Vit 5.tif:293: M-5	2395	6193	1.249	1.201	0.321	0.264	-0.222	-0.051
630	111-UNSEP1.gel-no Vit 5.tif:294: M-6	2094	5721	1.092	1.109	0.127	0.149	-0.485	0.029
631	111-UNSEP1.gel-no Vit 5.tif:295: M-7	1708	1604	0.891	0.311	-0.167	-1.685	NaN	-1.512
632	111-UNSEP1.gel-no Vit 5.tif:296: M-8	2267	8684	1.182	1.683	0.241	0.751	0	0.516
633	111-UNSEP1.gel-no Vit 5.tif:297: M-9	1738	1608	0.906	0.312	-0.142	-1.682	NaN	-1.534
634	111-UNSEP1.gel-no Vit 5.tif:298: M-10	1911	7508	0.997	1.455	-0.005	0.541	0.263	0.553
635	111-UNSEP1.gel-no Vit 5.tif:299: M-11	1705	1604	0.889	0.311	-0.17	-1.685	NaN	-1.51
636	111-UNSEP1.gel-no Vit 5.tif:300: M-12	1673	1701	0.872	0.33	-0.197	-1.601	NaN	-1.397
637	111-UNSEP1.gel-no Vit 5.tif:301: M-13	1986	5516	1.036	1.069	0.051	0.097	-0.222	0.052
638	111-UNSEP1.gel-no Vit 5.tif:302: M-14	2057	6138	1.073	1.19	0.101	0.251	0.7	0.156
639	111-UNSEP1.gel-no Vit 5.tif:303: M-15	1625	1676	0.847	0.325	-0.239	-1.622	NaN	-1.377
640	111-UNSEP1.gel-no Vit 5.tif:304: M-16	1883	7821	0.982	1.516	-0.026	0.6	0.459	0.633
641	111-UNSEP1.gel-no Vit 5.tif:305: M-17	2313	8577	1.206	1.663	0.27	0.733	0	0.469
642	111-UNSEP1.gel-no Vit 5.tif:306: M-18	1943	6018	1.013	1.167	0.019	0.222	0.939	0.21
643	111-UNSEP1.gel-no Vit 5.tif:307: M-19	2428	8580	1.266	1.663	0.34	0.734	-0.678	0.4
644	111-UNSEP1.gel-no Vit 5.tif:308: M-20	1618	1713	0.844	0.332	-0.245	-1.59	NaN	-1.339
645	111-UNSEP1.gel-no Vit 5.tif:309: M-21	1645	1698	0.858	0.329	-0.221	-1.603	NaN	-1.376
646	111-UNSEP1.gel-no Vit 5.tif:310: M-22	1561	1993	0.814	0.386	-0.297	-1.372	NaN	-1.069
647	111-UNSEP1.gel-no Vit 5.tif:311: M-23	1543	1823	0.805	0.353	-0.314	-1.501	NaN	-1.181
648	111-UNSEP1.gel-no Vit 5.tif:312: M-24	2143	12776	1.118	2.477	0.16	1.308	-0.515	1.154
649	111-UNSEP1.gel-no Vit 5.tif:313: N-1	3560	1500	1.856	0.291	0.893	-1.782	NaN	-2.668
650	111-UNSEP1.gel-no Vit 5.tif:314: N-2	2275	6382	1.186	1.237	0.247	0.307	0.663	0.067
651	111-UNSEP1.gel-no Vit 5.tif:315: N-3	2406	7199	1.255	1.396	0.327	0.481	-0.193	0.16
652	111-UNSEP1.gel-no Vit 5.tif:316: N-4	2580	6464	1.345	1.253	0.428	0.325	-0.415	-0.096
653	111-UNSEP1.gel-no Vit 5.tif:317: N-5	2437	5015	1.271	0.972	0.346	-0.041	-0.322	-0.38
654	111-UNSEP1.gel-no Vit 5.tif:318: N-6	1799	2000	0.938	0.388	-0.092	-1.367	NaN	-1.269
655	111-UNSEP1.gel-no Vit 5.tif:319: N-7	1984	3744	1.035	0.726	0.049	-0.462	NaN	-0.505
656	111-UNSEP1.gel-no Vit 5.tif:320: N-8	2433	5347	1.269	1.037	0.343	0.052	-0.485	-0.285
657	111-UNSEP1.gel-no Vit 5.tif:321: N-9	2352	7104	1.226	1.377	0.295	0.462	-0.193	0.173
658	111-UNSEP1.gel-no Vit 5.tif:322: N-10	1939	2590	1.011	0.502	0.016	-0.994	1.663	-1.004
659	111-UNSEP1.gel-no Vit 5.tif:323: N-11	2435	7062	1.27	1.369	0.345	0.453	-0.263	0.115
660	111-UNSEP1.gel-no Vit 5.tif:324: N-12	1966	6542	1.025	1.268	0.036	0.343	0.807	0.313
661	111-UNSEP1.gel-no Vit 5.tif:325: N-13	2254	5524	1.175	1.071	0.233	0.099	-0.263	-0.128
662	111-UNSEP1.gel-no Vit 5.tif:326: N-14	2451	7776	1.278	1.507	0.354	0.592	0.193	0.244
663	111-UNSEP1.gel-no Vit 5.tif:327: N-15	2200	6211	1.147	1.204	0.198	0.268	-0.485	0.076
664	111-UNSEP1.gel-no Vit 5.tif:328: N-16	2089	6574	1.089	1.274	0.123	0.35	0.893	0.233
665	111-UNSEP1.gel-no Vit 5.tif:329: N-17	1976	6328	1.03	1.227	0.043	0.295	0.459	0.258
666	111-UNSEP1.gel-no Vit 5.tif:330: N-18	2006	9677	1.046	1.876	0.065	0.908	-0.126	0.849
667	111-UNSEP1.gel-no Vit 5.tif:331: N-19	1631	1742	0.851	0.338	-0.234	-1.566	NaN	-1.326
668	111-UNSEP1.gel-no Vit 5.tif:332: N-20	2020	9125	1.053	1.769	0.075	0.823	-0.17	0.754
669	111-UNSEP1.gel-no Vit 5.tif:333: N-21	1642	1716	0.856	0.333	-0.224	-1.588	NaN	-1.358
670	111-UNSEP1.gel-no Vit 5.tif:334: N-22	2063	10254	1.076	1.988	0.105	0.991	-0.652	0.892
671	111-UNSEP1.gel-no Vit 5.tif:335: N-23	1509	1937	0.787	0.375	-0.346	-1.413	NaN	-1.061
672	111-UNSEP1.gel-no Vit 5.tif:336: N-24	1759	10160	0.917	1.97	-0.125	0.978	-0.263	1.109
673	113-UNSEP1.gel-no Vit 4.tif:1: A-1	1922	5140	0.997	0.766	-0.005	-0.385	0.415	-0.405
674	113-UNSEP1.gel-no Vit 4.tif:2: A-2	2723	9622	1.412	1.433	0.498	0.519	0.541	-0.003
675	113-UNSEP1.gel-no Vit 4.tif:3: A-3	2092	7364	1.085	1.097	0.117	0.133	0.939	-0.009
676	113-UNSEP1.gel-no Vit 4.tif:4: A-4	2116	10025	1.097	1.493	0.134	0.579	0	0.42
677	113-UNSEP1.gel-no Vit 4.tif:5: A-5	1837	1593	0.953	0.237	-0.07	-2.075	NaN	-2.03
678	113-UNSEP1.gel-no Vit 4.tif:6: A-6	2497	11045	1.295	1.645	0.373	0.718	0	0.321
679	113-UNSEP1.gel-no Vit 4.tif:7: A-7	2680	10299	1.39	1.534	0.475	0.617	0	0.118
680	113-UNSEP1.gel-no Vit 4.tif:8: A-8	2212	11394	1.147	1.697	0.198	0.763	0	0.54
681	113-UNSEP1.gel-no Vit 4.tif:9: A-9	1842	1679	0.955	0.25	-0.066	-1.999	NaN	-1.958
682	113-UNSEP1.gel-no Vit 4.tif:10: A-10	2088	9200	1.083	1.37	0.115	0.455	0	0.315
683	113-UNSEP1.gel-no Vit 4.tif:11: A-11	1867	1696	0.968	0.253	-0.047	-1.985	NaN	-1.963
684	113-UNSEP1.gel-no Vit 4.tif:12: A-12	1844	1740	0.956	0.259	-0.065	-1.948	NaN	-1.908
685	113-UNSEP1.gel-no Vit 4.tif:13: A-13	1857	1765	0.963	0.263	-0.054	-1.927	NaN	-1.898
686	113-UNSEP1.gel-no Vit 4.tif:14: A-14	2078	11622	1.078	1.731	0.108	0.792	-0.322	0.659
687	113-UNSEP1.gel-no Vit 4.tif:15: A-15	1822	7810	0.945	1.163	-0.082	0.218	1.441	0.275
688	113-UNSEP1.gel-no Vit 4.tif:16: A-16	1880	5527	0.975	0.823	-0.037	-0.281	0	-0.269
689	113-UNSEP1.gel-no Vit 4.tif:17: A-17	2075	13259	1.076	1.975	0.106	0.982	-0.241	0.851
690	113-UNSEP1.gel-no Vit 4.tif:18: A-18	1882	7200	0.976	1.073	-0.035	0.101	0.837	0.111
691	113-UNSEP1.gel-no Vit 4.tif:19: A-19	2067	12592	1.072	1.876	0.1	0.907	-0.459	0.782
692	113-UNSEP1.gel-no Vit 4.tif:20: A-20	2213	15990	1.148	2.382	0.199	1.252	-0.29	1.029
693	113-UNSEP1.gel-no Vit 4.tif:21: A-21	2796	11340	1.45	1.689	0.536	0.756	0.138	0.196
694	113-UNSEP1.gel-no Vit 4.tif:22: A-22	2539	1924	1.317	0.287	0.397	-1.803	NaN	-2.225
695	113-UNSEP1.gel-no Vit 4.tif:23: A-23	1805	1965	0.936	0.293	-0.095	-1.772	NaN	-1.702
696	113-UNSEP1.gel-no Vit 4.tif:24: A-24	2129	18414	1.104	2.743	0.143	1.456	0.354	1.288
697	113-UNSEP1.gel-no Vit 4.tif:25: B-1	2985	5320	1.548	0.792	0.63	-0.336	0.469	-0.991
698	113-UNSEP1.gel-no Vit 4.tif:26: B-2	2068	10285	1.072	1.532	0.101	0.615	0.322	0.49
699	113-UNSEP1.gel-no Vit 4.tif:27: B-3	3842	1557	1.992	0.232	0.994	-2.108	NaN	-3.128
700	113-UNSEP1.gel-no Vit 4.tif:28: B-4	1737	1628	0.901	0.243	-0.151	-2.044	NaN	-1.918
701	113-UNSEP1.gel-no Vit 4.tif:29: B-5	1682	1553	0.872	0.231	-0.197	-2.112	NaN	-1.94
702	113-UNSEP1.gel-no Vit 4.tif:30: B-6	2313	9246	1.199	1.377	0.262	0.462	0	0.175
703	113-UNSEP1.gel-no Vit 4.tif:31: B-7	1657	1558	0.859	0.232	-0.219	-2.107	NaN	-1.913
704	113-UNSEP1.gel-no Vit 4.tif:32: B-8	1687	1573	0.875	0.234	-0.193	-2.093	NaN	-1.925
705	113-UNSEP1.gel-no Vit 4.tif:33: B-9	1664	1601	0.863	0.238	-0.213	-2.068	NaN	-1.88
706	113-UNSEP1.gel-no Vit 4.tif:34: B-10	1815	1577	0.941	0.235	-0.087	-2.09	NaN	-2.027
707	113-UNSEP1.gel-no Vit 4.tif:35: B-11	2200	11539	1.141	1.719	0.19	0.781	0.115	0.567
708	113-UNSEP1.gel-no Vit 4.tif:36: B-12	1901	11097	0.986	1.653	-0.021	0.725	0.138	0.721
709	113-UNSEP1.gel-no Vit 4.tif:37: B-13	1896	8255	0.983	1.23	-0.024	0.298	0.17	0.298
710	113-UNSEP1.gel-no Vit 4.tif:38: B-14	1652	1657	0.857	0.247	-0.223	-2.018	NaN	-1.82
711	113-UNSEP1.gel-no Vit 4.tif:39: B-15	1936	11383	1.004	1.696	0.006	0.762	-0.193	0.731
712	113-UNSEP1.gel-no Vit 4.tif:40: B-16	1657	1883	0.859	0.28	-0.219	-1.834	NaN	-1.64
713	113-UNSEP1.gel-no Vit 4.tif:41: B-17	2063	8247	1.07	1.228	0.097	0.297	0	0.175
714	113-UNSEP1.gel-no Vit 4.tif:42: B-18	1958	9006	1.015	1.342	0.022	0.424	-0.193	0.377
715	113-UNSEP1.gel-no Vit 4.tif:43: B-19	1745	9539	0.905	1.421	-0.144	0.507	0.441	0.626
716	113-UNSEP1.gel-no Vit 4.tif:44: B-20	1647	2967	0.854	0.442	-0.228	-1.178	NaN	-0.975
717	113-UNSEP1.gel-no Vit 4.tif:45: B-21	1852	12726	0.96	1.896	-0.058	0.923	-0.379	0.956
718	113-UNSEP1.gel-no Vit 4.tif:46: B-22	2474	7093	1.283	1.057	0.359	0.079	0.737	-0.305
719	113-UNSEP1.gel-no Vit 4.tif:47: B-23	1808	12397	0.938	1.847	-0.093	0.885	0.206	0.953
720	113-UNSEP1.gel-no Vit 4.tif:48: B-24	2204	16507	1.143	2.459	0.193	1.298	-0.485	1.08
721	113-UNSEP1.gel-no Vit 4.tif:49: C-1	1811	1519	0.939	0.226	-0.091	-2.144	NaN	-2.078
722	113-UNSEP1.gel-no Vit 4.tif:50: C-2	2726	13842	1.414	2.062	0.499	1.044	0	0.52
723	113-UNSEP1.gel-no Vit 4.tif:51: C-3	2425	8952	1.258	1.333	0.331	0.415	0.678	0.06
724	113-UNSEP1.gel-no Vit 4.tif:52: C-4	2639	10802	1.368	1.609	0.453	0.686	0	0.209
725	113-UNSEP1.gel-no Vit 4.tif:53: C-5	2146	9821	1.113	1.463	0.154	0.549	0	0.37
726	113-UNSEP1.gel-no Vit 4.tif:54: C-6	2275	10209	1.18	1.521	0.238	0.605	0.152	0.341
727	113-UNSEP1.gel-no Vit 4.tif:55: C-7	2105	7179	1.092	1.069	0.126	0.097	0.585	-0.054
728	113-UNSEP1.gel-no Vit 4.tif:56: C-8	1869	6724	0.969	1.002	-0.045	0.002	1.485	0.023
729	113-UNSEP1.gel-no Vit 4.tif:57: C-9	1788	8620	0.927	1.284	-0.109	0.361	0	0.445
730	113-UNSEP1.gel-no Vit 4.tif:58: C-10	2623	12737	1.36	1.897	0.444	0.924	0.126	0.455
731	113-UNSEP1.gel-no Vit 4.tif:59: C-11	2150	12034	1.115	1.793	0.157	0.842	-0.152	0.66
732	113-UNSEP1.gel-no Vit 4.tif:60: C-12	1647	1607	0.854	0.239	-0.228	-2.063	NaN	-1.86
733	113-UNSEP1.gel-no Vit 4.tif:61: C-13	2301	12119	1.193	1.805	0.255	0.852	0.415	0.573
734	113-UNSEP1.gel-no Vit 4.tif:62: C-14	1661	1620	0.861	0.241	-0.215	-2.051	NaN	-1.86
735	113-UNSEP1.gel-no Vit 4.tif:63: C-15	2024	9660	1.05	1.439	0.07	0.525	0.469	0.43
736	113-UNSEP1.gel-no Vit 4.tif:64: C-16	2294	12854	1.19	1.915	0.25	0.937	-0.322	0.662
737	113-UNSEP1.gel-no Vit 4.tif:65: C-17	2095	8740	1.086	1.302	0.12	0.381	0.637	0.236
738	113-UNSEP1.gel-no Vit 4.tif:66: C-18	2186	14462	1.134	2.154	0.181	1.107	-0.138	0.901
739	113-UNSEP1.gel-no Vit 4.tif:67: C-19	1623	1720	0.842	0.256	-0.249	-1.965	NaN	-1.741
740	113-UNSEP1.gel-no Vit 4.tif:68: C-20	1925	11442	0.998	1.704	-0.003	0.769	0.322	0.747
741	113-UNSEP1.gel-no Vit 4.tif:69: C-21	1705	2306	0.884	0.343	-0.178	-1.542	1.858	-1.389
742	113-UNSEP1.gel-no Vit 4.tif:70: C-22	1586	2800	0.822	0.417	-0.282	-1.262	0	-1.004
743	113-UNSEP1.gel-no Vit 4.tif:71: C-23	1760	1836	0.913	0.273	-0.132	-1.87	NaN	-1.763
744	113-UNSEP1.gel-no Vit 4.tif:72: C-24	1995	16007	1.035	2.384	0.049	1.254	-0.415	1.18
745	113-UNSEP1.gel-no Vit 4.tif:73: D-1	1886	1528	0.978	0.228	-0.032	-2.135	NaN	-2.128
746	113-UNSEP1.gel-no Vit 4.tif:74: D-2	2384	4846	1.236	0.722	0.306	-0.47	1.926	-0.801
747	113-UNSEP1.gel-no Vit 4.tif:75: D-3	1899	7521	0.985	1.12	-0.022	0.164	0.17	0.161
748	113-UNSEP1.gel-no Vit 4.tif:76: D-4	2066	7016	1.071	1.045	0.099	0.064	1.379	-0.061
749	113-UNSEP1.gel-no Vit 4.tif:77: D-5	1895	1930	0.983	0.287	-0.025	-1.798	NaN	-1.798
750	113-UNSEP1.gel-no Vit 4.tif:78: D-6	1735	1692	0.9	0.252	-0.152	-1.988	NaN	-1.861
751	113-UNSEP1.gel-no Vit 4.tif:79: D-7	2267	7391	1.176	1.101	0.233	0.139	0.943	-0.119
752	113-UNSEP1.gel-no Vit 4.tif:80: D-8	2351	10016	1.219	1.492	0.286	0.577	0.515	0.267
753	113-UNSEP1.gel-no Vit 4.tif:81: D-9	1871	9513	0.97	1.417	-0.044	0.503	0	0.522
754	113-UNSEP1.gel-no Vit 4.tif:82: D-10	1724	1633	0.894	0.243	-0.162	-2.039	NaN	-1.903
755	113-UNSEP1.gel-no Vit 4.tif:83: D-11	2217	12173	1.15	1.813	0.201	0.859	-0.17	0.633
756	113-UNSEP1.gel-no Vit 4.tif:84: D-12	1823	1592	0.945	0.237	-0.081	-2.076	NaN	-2.02
757	113-UNSEP1.gel-no Vit 4.tif:85: D-13	2197	8970	1.139	1.336	0.188	0.418	-0.585	0.205
758	113-UNSEP1.gel-no Vit 4.tif:86: D-14	2073	11315	1.075	1.685	0.104	0.753	0.193	0.624
759	113-UNSEP1.gel-no Vit 4.tif:87: D-15	1686	1792	0.874	0.267	-0.194	-1.905	NaN	-1.736
760	113-UNSEP1.gel-no Vit 4.tif:88: D-16	1738	1830	0.901	0.273	-0.15	-1.875	NaN	-1.75
761	113-UNSEP1.gel-no Vit 4.tif:89: D-17	1661	1650	0.861	0.246	-0.215	-2.025	NaN	-1.834
762	113-UNSEP1.gel-no Vit 4.tif:90: D-18	1628	1644	0.844	0.245	-0.244	-2.03	NaN	-1.81
763	113-UNSEP1.gel-no Vit 4.tif:91: D-19	1630	1768	0.845	0.263	-0.243	-1.925	NaN	-1.707
764	113-UNSEP1.gel-no Vit 4.tif:92: D-20	1628	1716	0.844	0.256	-0.244	-1.968	NaN	-1.748
765	113-UNSEP1.gel-no Vit 4.tif:93: D-21	1668	2122	0.865	0.316	-0.209	-1.662	NaN	-1.477
766	113-UNSEP1.gel-no Vit 4.tif:94: D-22	1793	10796	0.93	1.608	-0.105	0.685	0.547	0.766
767	113-UNSEP1.gel-no Vit 4.tif:95: D-23	1846	12832	0.957	1.911	-0.063	0.935	0.206	0.973
768	113-UNSEP1.gel-no Vit 4.tif:96: D-24	1690	2230	0.876	0.332	-0.19	-1.59	NaN	-1.424
769	113-UNSEP1.gel-no Vit 4.tif:97: E-1	2317	8063	1.202	1.201	0.265	0.264	0.652	-0.025
770	113-UNSEP1.gel-no Vit 4.tif:98: E-2	2299	10999	1.192	1.638	0.254	0.712	-0.152	0.434
771	113-UNSEP1.gel-no Vit 4.tif:99: E-3	1648	1612	0.855	0.24	-0.227	-2.058	NaN	-1.856
772	113-UNSEP1.gel-no Vit 4.tif:100: E-4	2132	5561	1.106	0.828	0.145	-0.272	0.585	-0.441
773	113-UNSEP1.gel-no Vit 4.tif:101: E-5	1976	1593	1.025	0.237	0.035	-2.075	NaN	-2.135
774	113-UNSEP1.gel-no Vit 4.tif:102: E-6	2839	1541	1.472	0.23	0.558	-2.123	NaN	-2.706
775	113-UNSEP1.gel-no Vit 4.tif:103: E-7	1646	1568	0.854	0.234	-0.228	-2.098	NaN	-1.894
776	113-UNSEP1.gel-no Vit 4.tif:104: E-8	1822	1729	0.945	0.258	-0.082	-1.957	NaN	-1.9
777	113-UNSEP1.gel-no Vit 4.tif:105: E-9	1674	1545	0.868	0.23	-0.204	-2.119	NaN	-1.94
778	113-UNSEP1.gel-no Vit 4.tif:106: E-10	1692	1818	0.877	0.271	-0.189	-1.885	NaN	-1.721
779	113-UNSEP1.gel-no Vit 4.tif:107: E-11	1717	1578	0.89	0.235	-0.168	-2.089	NaN	-1.946
780	113-UNSEP1.gel-no Vit 4.tif:108: E-12	1805	6798	0.936	1.013	-0.095	0.018	1.206	0.089
781	113-UNSEP1.gel-no Vit 4.tif:109: E-13	1646	1718	0.854	0.256	-0.228	-1.966	NaN	-1.763
782	113-UNSEP1.gel-no Vit 4.tif:110: E-14	2079	1646	1.078	0.245	0.108	-2.028	NaN	-2.161
783	113-UNSEP1.gel-no Vit 4.tif:111: E-15	3851	1682	1.997	0.251	0.998	-1.997	NaN	-3.019
784	113-UNSEP1.gel-no Vit 4.tif:112: E-16	1896	12093	0.983	1.801	-0.024	0.849	-0.126	0.849
785	113-UNSEP1.gel-no Vit 4.tif:113: E-17	1679	1972	0.871	0.294	-0.2	-1.767	NaN	-1.592
786	113-UNSEP1.gel-no Vit 4.tif:114: E-18	1650	1682	0.856	0.251	-0.225	-1.997	NaN	-1.797
787	113-UNSEP1.gel-no Vit 4.tif:115: E-19	1913	2030	0.992	0.302	-0.012	-1.726	NaN	-1.739
788	113-UNSEP1.gel-no Vit 4.tif:116: E-20	1606	1736	0.833	0.259	-0.264	-1.951	NaN	-1.712
789	113-UNSEP1.gel-no Vit 4.tif:117: E-21	1941	1716	1.007	0.256	0.009	-1.968	NaN	-2.002
790	113-UNSEP1.gel-no Vit 4.tif:118: E-22	1716	1800	0.89	0.268	-0.168	-1.899	NaN	-1.755
791	113-UNSEP1.gel-no Vit 4.tif:119: E-23	1598	2400	0.829	0.358	-0.271	-1.484	NaN	-1.238
792	113-UNSEP1.gel-no Vit 4.tif:120: E-24	1670	2316	0.866	0.345	-0.208	-1.535	NaN	-1.353
793	113-UNSEP1.gel-no Vit 4.tif:121: F-1	3447	9836	1.787	1.465	0.838	0.551	-0.126	-0.312
794	113-UNSEP1.gel-no Vit 4.tif:122: F-2	1842	8135	0.955	1.212	-0.066	0.277	0.115	0.318
795	113-UNSEP1.gel-no Vit 4.tif:123: F-3	1634	1541	0.847	0.23	-0.239	-2.123	NaN	-1.909
796	113-UNSEP1.gel-no Vit 4.tif:124: F-4	2118	7543	1.098	1.124	0.135	0.168	0.379	0.008
797	113-UNSEP1.gel-no Vit 4.tif:125: F-5	2149	11146	1.114	1.66	0.156	0.731	-0.17	0.55
798	113-UNSEP1.gel-no Vit 4.tif:126: F-6	1772	1533	0.919	0.228	-0.122	-2.131	NaN	-2.033
799	113-UNSEP1.gel-no Vit 4.tif:127: F-7	1730	1518	0.897	0.226	-0.157	-2.145	NaN	-2.013
800	113-UNSEP1.gel-no Vit 4.tif:128: F-8	1747	1525	0.906	0.227	-0.143	-2.138	NaN	-2.021
801	113-UNSEP1.gel-no Vit 4.tif:129: F-9	1866	1595	0.968	0.238	-0.047	-2.073	NaN	-2.051
802	113-UNSEP1.gel-no Vit 4.tif:130: F-10	1724	1558	0.894	0.232	-0.162	-2.107	NaN	-1.97
803	113-UNSEP1.gel-no Vit 4.tif:131: F-11	1728	1568	0.896	0.234	-0.158	-2.098	NaN	-1.965
804	113-UNSEP1.gel-no Vit 4.tif:132: F-12	1675	1616	0.869	0.241	-0.203	-2.055	NaN	-1.876
805	113-UNSEP1.gel-no Vit 4.tif:133: F-13	1676	1602	0.869	0.239	-0.202	-2.067	NaN	-1.89
806	113-UNSEP1.gel-no Vit 4.tif:134: F-14	1928	9866	1	1.47	-0.0003118	0.555	-0.17	0.531
807	113-UNSEP1.gel-no Vit 4.tif:135: F-15	3000	11649	1.556	1.735	0.638	0.795	-0.193	0.133
808	113-UNSEP1.gel-no Vit 4.tif:136: F-16	1636	1786	0.848	0.266	-0.237	-1.91	NaN	-1.698
809	113-UNSEP1.gel-no Vit 4.tif:137: F-17	2038	10697	1.057	1.593	0.08	0.672	-0.678	0.568
810	113-UNSEP1.gel-no Vit 4.tif:138: F-18	3619	14381	1.877	2.142	0.908	1.099	0.107	0.166
811	113-UNSEP1.gel-no Vit 4.tif:139: F-19	1685	1708	0.874	0.254	-0.195	-1.975	NaN	-1.805
812	113-UNSEP1.gel-no Vit 4.tif:140: F-20	1616	1701	0.838	0.253	-0.255	-1.981	NaN	-1.75
813	113-UNSEP1.gel-no Vit 4.tif:141: F-21	2068	1782	1.072	0.265	0.101	-1.914	NaN	-2.039
814	113-UNSEP1.gel-no Vit 4.tif:142: F-22	1891	1786	0.981	0.266	-0.028	-1.91	NaN	-1.907
815	113-UNSEP1.gel-no Vit 4.tif:143: F-23	1857	2400	0.963	0.358	-0.054	-1.484	NaN	-1.454
816	113-UNSEP1.gel-no Vit 4.tif:144: F-24	1906	13408	0.988	1.997	-0.017	0.998	0.396	0.99
817	113-UNSEP1.gel-no Vit 4.tif:145: G-1	1802	1461	0.934	0.218	-0.098	-2.2	NaN	-2.127
818	113-UNSEP1.gel-no Vit 4.tif:146: G-2	1673	1437	0.868	0.214	-0.205	-2.224	NaN	-2.044
819	113-UNSEP1.gel-no Vit 4.tif:147: G-3	1674	1474	0.868	0.22	-0.204	-2.187	NaN	-2.008
820	113-UNSEP1.gel-no Vit 4.tif:148: G-4	1650	1579	0.856	0.235	-0.225	-2.088	NaN	-1.888
821	113-UNSEP1.gel-no Vit 4.tif:149: G-5	2747	9273	1.424	1.381	0.51	0.466	0.459	-0.069
822	113-UNSEP1.gel-no Vit 4.tif:150: G-6	2418	10647	1.254	1.586	0.326	0.665	0	0.314
823	113-UNSEP1.gel-no Vit 4.tif:151: G-7	2396	9163	1.242	1.365	0.313	0.449	0	0.111
824	113-UNSEP1.gel-no Vit 4.tif:152: G-8	2342	9724	1.214	1.448	0.28	0.535	0.652	0.229
825	113-UNSEP1.gel-no Vit 4.tif:153: G-9	1763	1572	0.914	0.234	-0.129	-2.094	NaN	-1.99
826	113-UNSEP1.gel-no Vit 4.tif:154: G-10	1707	1555	0.885	0.232	-0.176	-2.11	NaN	-1.959
827	113-UNSEP1.gel-no Vit 4.tif:155: G-11	2598	10783	1.347	1.606	0.43	0.684	-0.222	0.229
828	113-UNSEP1.gel-no Vit 4.tif:156: G-12	1999	1616	1.037	0.241	0.052	-2.055	NaN	-2.131
829	113-UNSEP1.gel-no Vit 4.tif:157: G-13	1638	1596	0.849	0.238	-0.235	-2.073	NaN	-1.862
830	113-UNSEP1.gel-no Vit 4.tif:158: G-14	1691	1735	0.877	0.258	-0.19	-1.952	NaN	-1.787
831	113-UNSEP1.gel-no Vit 4.tif:159: G-15	1925	8796	0.998	1.31	-0.003	0.39	-0.585	0.368
832	113-UNSEP1.gel-no Vit 4.tif:160: G-16	1664	1649	0.863	0.246	-0.213	-2.025	NaN	-1.837
833	113-UNSEP1.gel-no Vit 4.tif:161: G-17	1761	1655	0.913	0.247	-0.131	-2.02	NaN	-1.914
834	113-UNSEP1.gel-no Vit 4.tif:162: G-18	1628	1793	0.844	0.267	-0.244	-1.905	NaN	-1.685
835	113-UNSEP1.gel-no Vit 4.tif:163: G-19	2327	11603	1.207	1.728	0.271	0.789	-0.17	0.494
836	113-UNSEP1.gel-no Vit 4.tif:164: G-20	1641	1685	0.851	0.251	-0.233	-1.994	NaN	-1.786
837	113-UNSEP1.gel-no Vit 4.tif:165: G-21	1945	8416	1.009	1.254	0.012	0.326	1.784	0.289
838	113-UNSEP1.gel-no Vit 4.tif:166: G-22	1810	1791	0.939	0.267	-0.091	-1.906	NaN	-1.84
839	113-UNSEP1.gel-no Vit 4.tif:167: G-23	1760	9487	0.913	1.413	-0.132	0.499	-0.222	0.606
840	113-UNSEP1.gel-no Vit 4.tif:168: G-24	1706	1835	0.885	0.273	-0.177	-1.871	NaN	-1.719
841	113-UNSEP1.gel-no Vit 4.tif:169: H-1	2226	8636	1.154	1.286	0.207	0.363	0.115	0.131
842	113-UNSEP1.gel-no Vit 4.tif:170: H-2	1653	1439	0.857	0.214	-0.222	-2.222	NaN	-2.024
843	113-UNSEP1.gel-no Vit 4.tif:171: H-3	1691	1446	0.877	0.215	-0.19	-2.215	NaN	-2.05
844	113-UNSEP1.gel-no Vit 4.tif:172: H-4	2349	1572	1.218	0.234	0.285	-2.094	NaN	-2.404
845	113-UNSEP1.gel-no Vit 4.tif:173: H-5	1639	1491	0.85	0.222	-0.235	-2.171	NaN	-1.961
846	113-UNSEP1.gel-no Vit 4.tif:174: H-6	2209	1853	1.145	0.276	0.196	-1.857	NaN	-2.078
847	113-UNSEP1.gel-no Vit 4.tif:175: H-7	1756	1549	0.911	0.231	-0.135	-2.116	NaN	-2.005
848	113-UNSEP1.gel-no Vit 4.tif:176: H-8	2106	8951	1.092	1.333	0.127	0.415	0.222	0.263
849	113-UNSEP1.gel-no Vit 4.tif:177: H-9	2044	8101	1.06	1.207	0.084	0.271	0.7	0.162
850	113-UNSEP1.gel-no Vit 4.tif:178: H-10	2351	9983	1.219	1.487	0.286	0.572	0.363	0.262
851	113-UNSEP1.gel-no Vit 4.tif:179: H-11	1767	1567	0.916	0.233	-0.126	-2.099	NaN	-1.998
852	113-UNSEP1.gel-no Vit 4.tif:180: H-12	1919	1569	0.995	0.234	-0.007	-2.097	NaN	-2.115
853	113-UNSEP1.gel-no Vit 4.tif:181: H-13	1669	1589	0.865	0.237	-0.208	-2.079	NaN	-1.895
854	113-UNSEP1.gel-no Vit 4.tif:182: H-14	2006	9517	1.04	1.418	0.057	0.503	-0.485	0.422
855	113-UNSEP1.gel-no Vit 4.tif:183: H-15	1849	10540	0.959	1.57	-0.061	0.651	-0.193	0.687
856	113-UNSEP1.gel-no Vit 4.tif:184: H-16	1853	8644	0.961	1.288	-0.058	0.365	0.341	0.397
857	113-UNSEP1.gel-no Vit 4.tif:185: H-17	1725	1800	0.895	0.268	-0.161	-1.899	NaN	-1.763
858	113-UNSEP1.gel-no Vit 4.tif:186: H-18	1974	9651	1.024	1.438	0.034	0.524	-0.193	0.465
859	113-UNSEP1.gel-no Vit 4.tif:187: H-19	1625	1789	0.843	0.266	-0.247	-1.908	NaN	-1.686
860	113-UNSEP1.gel-no Vit 4.tif:188: H-20	1625	1736	0.843	0.259	-0.247	-1.951	NaN	-1.729
861	113-UNSEP1.gel-no Vit 4.tif:189: H-21	1801	9967	0.934	1.485	-0.099	0.57	-0.459	0.644
862	113-UNSEP1.gel-no Vit 4.tif:190: H-22	2462	13266	1.277	1.976	0.352	0.983	-0.459	0.605
863	113-UNSEP1.gel-no Vit 4.tif:191: H-23	1639	7353	0.85	1.095	-0.235	0.131	0.918	0.341
864	113-UNSEP1.gel-no Vit 4.tif:192: H-24	1712	1908	0.888	0.284	-0.172	-1.815	NaN	-1.668
865	113-UNSEP1.gel-no Vit 4.tif:193: I-1	1730	2123	0.897	0.316	-0.157	-1.661	NaN	-1.529
866	113-UNSEP1.gel-no Vit 4.tif:194: I-2	1757	1440	0.911	0.215	-0.134	-2.221	NaN	-2.111
867	113-UNSEP1.gel-no Vit 4.tif:195: I-3	2030	8873	1.053	1.322	0.074	0.402	0	0.304
868	113-UNSEP1.gel-no Vit 4.tif:196: I-4	2312	10336	1.199	1.54	0.262	0.623	0.152	0.336
869	113-UNSEP1.gel-no Vit 4.tif:197: I-5	2098	8049	1.088	1.199	0.122	0.262	0	0.115
870	113-UNSEP1.gel-no Vit 4.tif:198: I-6	2615	11678	1.356	1.74	0.439	0.799	0.193	0.334
871	113-UNSEP1.gel-no Vit 4.tif:199: I-7	1656	1516	0.859	0.226	-0.22	-2.147	NaN	-1.952
872	113-UNSEP1.gel-no Vit 4.tif:200: I-8	1861	10616	0.965	1.581	-0.051	0.661	0	0.688
873	113-UNSEP1.gel-no Vit 4.tif:201: I-9	1697	1512	0.88	0.225	-0.184	-2.151	NaN	-1.991
874	113-UNSEP1.gel-no Vit 4.tif:202: I-10	1676	1520	0.869	0.226	-0.202	-2.143	NaN	-1.965
875	113-UNSEP1.gel-no Vit 4.tif:203: I-11	1873	9584	0.971	1.428	-0.042	0.514	0	0.531
876	113-UNSEP1.gel-no Vit 4.tif:204: I-12	1715	1567	0.889	0.233	-0.169	-2.099	NaN	-1.955
877	113-UNSEP1.gel-no Vit 4.tif:205: I-13	1897	1552	0.984	0.231	-0.024	-2.113	NaN	-2.114
878	113-UNSEP1.gel-no Vit 4.tif:206: I-14	2097	8652	1.087	1.289	0.121	0.366	-0.222	0.22
879	113-UNSEP1.gel-no Vit 4.tif:207: I-15	2412	9711	1.251	1.447	0.323	0.533	-0.263	0.185
880	113-UNSEP1.gel-no Vit 4.tif:208: I-16	1896	8276	0.983	1.233	-0.024	0.302	0.447	0.302
881	113-UNSEP1.gel-no Vit 4.tif:209: I-17	2100	9143	1.089	1.362	0.123	0.446	1.1	0.298
882	113-UNSEP1.gel-no Vit 4.tif:210: I-18	1993	11188	1.033	1.667	0.048	0.737	-0.322	0.665
883	113-UNSEP1.gel-no Vit 4.tif:211: I-19	1719	1683	0.891	0.251	-0.166	-1.996	NaN	-1.855
884	113-UNSEP1.gel-no Vit 4.tif:212: I-20	2408	11399	1.249	1.698	0.32	0.764	-0.678	0.419
885	113-UNSEP1.gel-no Vit 4.tif:213: I-21	1681	8682	0.872	1.293	-0.198	0.371	-0.29	0.544
886	113-UNSEP1.gel-no Vit 4.tif:214: I-22	1879	11655	0.974	1.736	-0.037	0.796	0.503	0.808
887	113-UNSEP1.gel-no Vit 4.tif:215: I-23	2055	13336	1.066	1.987	0.092	0.99	-0.515	0.874
888	113-UNSEP1.gel-no Vit 4.tif:216: I-24	2022	15950	1.049	2.376	0.068	1.248	0.263	1.155
889	113-UNSEP1.gel-no Vit 4.tif:217: J-1	2473	8263	1.282	1.231	0.359	0.3	0	-0.084
890	113-UNSEP1.gel-no Vit 4.tif:218: J-2	2320	8548	1.203	1.273	0.267	0.349	0.778	0.057
891	113-UNSEP1.gel-no Vit 4.tif:219: J-3	2047	8151	1.061	1.214	0.086	0.28	0.263	0.169
892	113-UNSEP1.gel-no Vit 4.tif:220: J-4	2183	9322	1.132	1.389	0.179	0.474	0	0.27
893	113-UNSEP1.gel-no Vit 4.tif:221: J-5	2256	9504	1.17	1.416	0.226	0.502	0	0.25
894	113-UNSEP1.gel-no Vit 4.tif:222: J-6	1753	1608	0.909	0.24	-0.138	-2.062	NaN	-1.949
895	113-UNSEP1.gel-no Vit 4.tif:223: J-7	2112	10830	1.095	1.613	0.131	0.69	0.415	0.534
896	113-UNSEP1.gel-no Vit 4.tif:224: J-8	2468	9719	1.28	1.448	0.356	0.534	2	0.153
897	113-UNSEP1.gel-no Vit 4.tif:225: J-9	1771	2231	0.918	0.332	-0.123	-1.589	1.728	-1.491
898	113-UNSEP1.gel-no Vit 4.tif:226: J-10	1643	1559	0.852	0.232	-0.231	-2.106	NaN	-1.9
899	113-UNSEP1.gel-no Vit 4.tif:227: J-11	2065	9230	1.071	1.375	0.099	0.459	-0.222	0.336
900	113-UNSEP1.gel-no Vit 4.tif:228: J-12	2026	9512	1.051	1.417	0.071	0.503	-0.193	0.407
901	113-UNSEP1.gel-no Vit 4.tif:229: J-13	2457	8888	1.274	1.324	0.349	0.405	-0.193	0.031
902	113-UNSEP1.gel-no Vit 4.tif:230: J-14	1637	1624	0.849	0.242	-0.236	-2.047	NaN	-1.836
903	113-UNSEP1.gel-no Vit 4.tif:231: J-15	1632	1681	0.846	0.25	-0.241	-1.998	NaN	-1.782
904	113-UNSEP1.gel-no Vit 4.tif:232: J-16	1636	1620	0.848	0.241	-0.237	-2.051	NaN	-1.839
905	113-UNSEP1.gel-no Vit 4.tif:233: J-17	2286	12702	1.185	1.892	0.245	0.92	-0.193	0.65
906	113-UNSEP1.gel-no Vit 4.tif:234: J-18	1721	4255	0.892	0.634	-0.164	-0.658	0.387	-0.519
907	113-UNSEP1.gel-no Vit 4.tif:235: J-19	1735	1792	0.9	0.267	-0.152	-1.905	NaN	-1.778
908	113-UNSEP1.gel-no Vit 4.tif:236: J-20	1935	1727	1.003	0.257	0.005	-1.959	NaN	-1.988
909	113-UNSEP1.gel-no Vit 4.tif:237: J-21	1630	1751	0.845	0.261	-0.243	-1.939	NaN	-1.721
910	113-UNSEP1.gel-no Vit 4.tif:238: J-22	1658	10562	0.86	1.573	-0.218	0.654	0.222	0.847
911	113-UNSEP1.gel-no Vit 4.tif:239: J-23	2098	1804	1.088	0.269	0.122	-1.896	NaN	-2.042
912	113-UNSEP1.gel-no Vit 4.tif:240: J-24	1810	11810	0.939	1.759	-0.091	0.815	0.637	0.882
913	113-UNSEP1.gel-no Vit 4.tif:241: K-1	1769	1454	0.917	0.217	-0.124	-2.207	NaN	-2.107
914	113-UNSEP1.gel-no Vit 4.tif:242: K-2	1755	1479	0.91	0.22	-0.136	-2.182	NaN	-2.071
915	113-UNSEP1.gel-no Vit 4.tif:243: K-3	1674	1466	0.868	0.218	-0.204	-2.195	NaN	-2.016
916	113-UNSEP1.gel-no Vit 4.tif:244: K-4	2178	8300	1.129	1.236	0.176	0.306	0	0.106
917	113-UNSEP1.gel-no Vit 4.tif:245: K-5	1760	1463	0.913	0.218	-0.132	-2.198	NaN	-2.091
918	113-UNSEP1.gel-no Vit 4.tif:246: K-6	1654	1570	0.858	0.234	-0.221	-2.096	NaN	-1.9
919	113-UNSEP1.gel-no Vit 4.tif:247: K-7	1705	2651	0.884	0.395	-0.178	-1.34	NaN	-1.188
920	113-UNSEP1.gel-no Vit 4.tif:248: K-8	1661	1640	0.861	0.244	-0.215	-2.033	NaN	-1.843
921	113-UNSEP1.gel-no Vit 4.tif:249: K-9	1636	2201	0.848	0.328	-0.237	-1.609	NaN	-1.396
922	113-UNSEP1.gel-no Vit 4.tif:250: K-10	1933	1807	1.002	0.269	0.003	-1.893	NaN	-1.922
923	113-UNSEP1.gel-no Vit 4.tif:251: K-11	1680	1707	0.871	0.254	-0.199	-1.976	NaN	-1.801
924	113-UNSEP1.gel-no Vit 4.tif:252: K-12	1703	1580	0.883	0.235	-0.179	-2.087	NaN	-1.933
925	113-UNSEP1.gel-no Vit 4.tif:253: K-13	1684	1564	0.873	0.233	-0.196	-2.102	NaN	-1.931
926	113-UNSEP1.gel-no Vit 4.tif:254: K-14	2433	10770	1.262	1.604	0.335	0.682	-0.415	0.322
927	113-UNSEP1.gel-no Vit 4.tif:255: K-15	1660	1650	0.861	0.246	-0.216	-2.025	NaN	-1.833
928	113-UNSEP1.gel-no Vit 4.tif:256: K-16	2009	9780	1.042	1.457	0.059	0.543	-0.222	0.459
929	113-UNSEP1.gel-no Vit 4.tif:257: K-17	1646	1671	0.854	0.249	-0.228	-2.006	NaN	-1.803
930	113-UNSEP1.gel-no Vit 4.tif:258: K-18	1655	1942	0.858	0.289	-0.221	-1.789	NaN	-1.594
931	113-UNSEP1.gel-no Vit 4.tif:259: K-19	1869	1718	0.969	0.256	-0.045	-1.966	NaN	-1.946
932	113-UNSEP1.gel-no Vit 4.tif:260: K-20	1771	1641	0.918	0.244	-0.123	-2.032	NaN	-1.934
933	113-UNSEP1.gel-no Vit 4.tif:261: K-21	2812	1660	1.458	0.247	0.544	-2.016	NaN	-2.585
934	113-UNSEP1.gel-no Vit 4.tif:262: K-22	1576	1692	0.817	0.252	-0.291	-1.988	NaN	-1.722
935	113-UNSEP1.gel-no Vit 4.tif:263: K-23	2219	14247	1.151	2.122	0.202	1.086	-0.459	0.858
936	113-UNSEP1.gel-no Vit 4.tif:264: K-24	1728	1814	0.896	0.27	-0.158	-1.888	NaN	-1.754
937	113-UNSEP1.gel-no Vit 4.tif:265: L-1	1758	1472	0.912	0.219	-0.133	-2.189	NaN	-2.081
938	113-UNSEP1.gel-no Vit 4.tif:266: L-2	1649	1456	0.855	0.217	-0.226	-2.205	NaN	-2.004
939	113-UNSEP1.gel-no Vit 4.tif:267: L-3	1633	1460	0.847	0.217	-0.24	-2.201	NaN	-1.986
940	113-UNSEP1.gel-no Vit 4.tif:268: L-4	2099	8904	1.088	1.326	0.122	0.407	0.874	0.26
941	113-UNSEP1.gel-no Vit 4.tif:269: L-5	1729	1451	0.897	0.216	-0.157	-2.21	NaN	-2.077
942	113-UNSEP1.gel-no Vit 4.tif:270: L-6	1849	4778	0.959	0.712	-0.061	-0.491	0	-0.455
943	113-UNSEP1.gel-no Vit 4.tif:271: L-7	1814	1466	0.941	0.218	-0.088	-2.195	NaN	-2.132
944	113-UNSEP1.gel-no Vit 4.tif:272: L-8	1631	1503	0.846	0.224	-0.242	-2.159	NaN	-1.942
945	113-UNSEP1.gel-no Vit 4.tif:273: L-9	1659	1519	0.86	0.226	-0.217	-2.144	NaN	-1.952
946	113-UNSEP1.gel-no Vit 4.tif:274: L-10	2290	11340	1.188	1.689	0.248	0.756	0	0.484
947	113-UNSEP1.gel-no Vit 4.tif:275: L-11	2541	1522	1.318	0.227	0.398	-2.141	NaN	-2.564
948	113-UNSEP1.gel-no Vit 4.tif:276: L-12	1628	1564	0.844	0.233	-0.244	-2.102	NaN	-1.882
949	113-UNSEP1.gel-no Vit 4.tif:277: L-13	1967	5826	1.02	0.868	0.029	-0.205	1.907	-0.258
950	113-UNSEP1.gel-no Vit 4.tif:278: L-14	1634	1568	0.847	0.234	-0.239	-2.098	NaN	-1.884
951	113-UNSEP1.gel-no Vit 4.tif:279: L-15	1836	6624	0.952	0.987	-0.071	-0.019	1.202	0.027
952	113-UNSEP1.gel-no Vit 4.tif:280: L-16	2330	14031	1.208	2.09	0.273	1.064	0	0.766
953	113-UNSEP1.gel-no Vit 4.tif:281: L-17	1711	4110	0.887	0.612	-0.173	-0.708	-0.193	-0.56
954	113-UNSEP1.gel-no Vit 4.tif:282: L-18	1771	1657	0.918	0.247	-0.123	-2.018	NaN	-1.92
955	113-UNSEP1.gel-no Vit 4.tif:283: L-19	1646	1630	0.854	0.243	-0.228	-2.042	NaN	-1.839
956	113-UNSEP1.gel-no Vit 4.tif:284: L-20	2196	11260	1.139	1.677	0.187	0.746	0.585	0.534
957	113-UNSEP1.gel-no Vit 4.tif:285: L-21	3333	1720	1.728	0.256	0.789	-1.965	NaN	-2.779
958	113-UNSEP1.gel-no Vit 4.tif:286: L-22	2583	14491	1.339	2.159	0.422	1.11	-0.585	0.664
959	113-UNSEP1.gel-no Vit 4.tif:287: L-23	1607	1773	0.833	0.264	-0.263	-1.921	NaN	-1.683
960	113-UNSEP1.gel-no Vit 4.tif:288: L-24	1735	1844	0.9	0.275	-0.152	-1.864	NaN	-1.737
961	113-UNSEP1.gel-no Vit 4.tif:289: M-1	1703	1465	0.883	0.218	-0.179	-2.196	NaN	-2.042
962	113-UNSEP1.gel-no Vit 4.tif:290: M-2	1779	1439	0.923	0.214	-0.116	-2.222	NaN	-2.13
963	113-UNSEP1.gel-no Vit 4.tif:291: M-3	1665	1549	0.863	0.231	-0.212	-2.116	NaN	-1.929
964	113-UNSEP1.gel-no Vit 4.tif:292: M-4	1634	1459	0.847	0.217	-0.239	-2.202	NaN	-1.988
965	113-UNSEP1.gel-no Vit 4.tif:293: M-5	1709	1550	0.886	0.231	-0.174	-2.115	NaN	-1.965
966	113-UNSEP1.gel-no Vit 4.tif:294: M-6	1711	1456	0.887	0.217	-0.173	-2.205	NaN	-2.057
967	113-UNSEP1.gel-no Vit 4.tif:295: M-7	2050	1466	1.063	0.218	0.088	-2.195	NaN	-2.308
968	113-UNSEP1.gel-no Vit 4.tif:296: M-8	2159	8258	1.12	1.23	0.163	0.299	0	0.111
969	113-UNSEP1.gel-no Vit 4.tif:297: M-9	1898	8203	0.984	1.222	-0.023	0.289	0.485	0.287
970	113-UNSEP1.gel-no Vit 4.tif:298: M-10	1764	1526	0.915	0.227	-0.129	-2.137	NaN	-2.034
971	113-UNSEP1.gel-no Vit 4.tif:299: M-11	1642	1849	0.851	0.275	-0.232	-1.86	NaN	-1.653
972	113-UNSEP1.gel-no Vit 4.tif:300: M-12	1740	1530	0.902	0.228	-0.148	-2.133	NaN	-2.01
973	113-UNSEP1.gel-no Vit 4.tif:301: M-13	2514	5949	1.304	0.886	0.383	-0.174	1.344	-0.582
974	113-UNSEP1.gel-no Vit 4.tif:302: M-14	1977	1552	1.025	0.231	0.036	-2.113	NaN	-2.174
975	113-UNSEP1.gel-no Vit 4.tif:303: M-15	2257	1614	1.17	0.24	0.227	-2.056	NaN	-2.308
976	113-UNSEP1.gel-no Vit 4.tif:304: M-16	2177	10103	1.129	1.505	0.175	0.59	0.678	0.39
977	113-UNSEP1.gel-no Vit 4.tif:305: M-17	2409	9881	1.249	1.472	0.321	0.558	-0.193	0.212
978	113-UNSEP1.gel-no Vit 4.tif:306: M-18	2232	11995	1.157	1.787	0.211	0.837	0	0.602
979	113-UNSEP1.gel-no Vit 4.tif:307: M-19	2049	10137	1.063	1.51	0.088	0.595	-0.363	0.482
980	113-UNSEP1.gel-no Vit 4.tif:308: M-20	2151	12099	1.115	1.802	0.158	0.85	-0.138	0.667
981	113-UNSEP1.gel-no Vit 4.tif:309: M-21	1966	9311	1.019	1.387	0.028	0.472	-0.322	0.419
982	113-UNSEP1.gel-no Vit 4.tif:310: M-22	3210	11701	1.665	1.743	0.735	0.802	-0.138	0.042
983	113-UNSEP1.gel-no Vit 4.tif:311: M-23	2723	10086	1.412	1.502	0.498	0.587	-0.263	0.065
984	113-UNSEP1.gel-no Vit 4.tif:312: M-24	2122	12367	1.1	1.842	0.138	0.881	-0.652	0.719
985	113-UNSEP1.gel-no Vit 4.tif:313: N-1	1735	2503	0.9	0.373	-0.152	-1.423	NaN	-1.296
986	113-UNSEP1.gel-no Vit 4.tif:314: N-2	2133	9482	1.106	1.412	0.145	0.498	-0.126	0.328
987	113-UNSEP1.gel-no Vit 4.tif:315: N-3	2009	9543	1.042	1.422	0.059	0.507	-0.138	0.424
988	113-UNSEP1.gel-no Vit 4.tif:316: N-4	1662	1429	0.862	0.213	-0.214	-2.232	NaN	-2.042
989	113-UNSEP1.gel-no Vit 4.tif:317: N-5	2081	9979	1.079	1.486	0.11	0.572	0.263	0.437
990	113-UNSEP1.gel-no Vit 4.tif:318: N-6	2103	7451	1.091	1.11	0.125	0.15	0.241	0.0005512
991	113-UNSEP1.gel-no Vit 4.tif:319: N-7	2255	8809	1.169	1.312	0.226	0.392	0.807	0.141
992	113-UNSEP1.gel-no Vit 4.tif:320: N-8	1697	1559	0.88	0.232	-0.184	-2.106	NaN	-1.947
993	113-UNSEP1.gel-no Vit 4.tif:321: N-9	1691	1489	0.877	0.222	-0.19	-2.173	NaN	-2.008
994	113-UNSEP1.gel-no Vit 4.tif:322: N-10	2068	9553	1.072	1.423	0.101	0.509	0	0.383
995	113-UNSEP1.gel-no Vit 4.tif:323: N-11	1968	8721	1.021	1.299	0.029	0.377	0.379	0.323
996	113-UNSEP1.gel-no Vit 4.tif:324: N-12	2206	11123	1.144	1.657	0.194	0.728	-0.152	0.51
997	113-UNSEP1.gel-no Vit 4.tif:325: N-13	2482	8981	1.287	1.338	0.364	0.42	0.459	0.031
998	113-UNSEP1.gel-no Vit 4.tif:326: N-14	3570	8797	1.851	1.31	0.889	0.39	0.848	-0.523
999	113-UNSEP1.gel-no Vit 4.tif:327: N-15	1984	8313	1.029	1.238	0.041	0.308	-0.193	0.243
1000	113-UNSEP1.gel-no Vit 4.tif:328: N-16	2913	4737	1.511	0.706	0.595	-0.503	1.1	-1.123
1001	113-UNSEP1.gel-no Vit 4.tif:329: N-17	2145	11507	1.112	1.714	0.154	0.777	0.152	0.599
1002	113-UNSEP1.gel-no Vit 4.tif:330: N-18	1721	1721	0.892	0.256	-0.164	-1.964	NaN	-1.824
1003	113-UNSEP1.gel-no Vit 4.tif:331: N-19	1973	11986	1.023	1.785	0.033	0.836	-0.322	0.778
1004	113-UNSEP1.gel-no Vit 4.tif:332: N-20	1736	2426	0.9	0.361	-0.152	-1.468	NaN	-1.342
1005	113-UNSEP1.gel-no Vit 4.tif:333: N-21	2018	11796	1.046	1.757	0.066	0.813	-0.138	0.723
1006	113-UNSEP1.gel-no Vit 4.tif:334: N-22	2809	1711	1.457	0.255	0.543	-1.972	NaN	-2.54
1007	113-UNSEP1.gel-no Vit 4.tif:335: N-23	3096	1791	1.605	0.267	0.683	-1.906	NaN	-2.614
1008	113-UNSEP1.gel-no Vit 4.tif:336: N-24	2095	13346	1.086	1.988	0.12	0.991	-0.379	0.847
1009	114-UNSEP1.gel-no Vit 3.tif:1: A-1	3150	9232	1.752	1.574	0.809	0.654	0.585	-0.183
1010	114-UNSEP1.gel-no Vit 3.tif:2: A-2	2262	8169	1.258	1.393	0.331	0.478	0.585	0.119
1011	114-UNSEP1.gel-no Vit 3.tif:3: A-3	2516	11508	1.4	1.962	0.485	0.972	0.441	0.46
1012	114-UNSEP1.gel-no Vit 3.tif:4: A-4	2005	1728	1.115	0.295	0.157	-1.763	NaN	-1.948
1013	114-UNSEP1.gel-no Vit 3.tif:5: A-5	2033	1718	1.131	0.293	0.177	-1.771	NaN	-1.977
1014	114-UNSEP1.gel-no Vit 3.tif:6: A-6	2252	7552	1.253	1.288	0.325	0.365	0.759	0.012
1015	114-UNSEP1.gel-no Vit 3.tif:7: A-7	2113	10421	1.175	1.777	0.233	0.829	-0.29	0.568
1016	114-UNSEP1.gel-no Vit 3.tif:8: A-8	2055	7992	1.143	1.363	0.193	0.446	0.954	0.226
1017	114-UNSEP1.gel-no Vit 3.tif:9: A-9	1957	1819	1.089	0.31	0.122	-1.689	NaN	-1.839
1018	114-UNSEP1.gel-no Vit 3.tif:10: A-10	2122	9114	1.18	1.554	0.239	0.636	0.354	0.369
1019	114-UNSEP1.gel-no Vit 3.tif:11: A-11	1860	2168	1.035	0.37	0.049	-1.436	NaN	-1.513
1020	114-UNSEP1.gel-no Vit 3.tif:12: A-12	1837	1777	1.022	0.303	0.031	-1.723	NaN	-1.782
1021	114-UNSEP1.gel-no Vit 3.tif:13: A-13	2190	1785	1.218	0.304	0.285	-1.716	NaN	-2.029
1022	114-UNSEP1.gel-no Vit 3.tif:14: A-14	1959	5504	1.09	0.938	0.124	-0.092	1.285	-0.244
1023	114-UNSEP1.gel-no Vit 3.tif:15: A-15	1963	9122	1.092	1.555	0.127	0.637	0.107	0.482
1024	114-UNSEP1.gel-no Vit 3.tif:16: A-16	1868	11130	1.039	1.898	0.055	0.924	-0.115	0.841
1025	114-UNSEP1.gel-no Vit 3.tif:17: A-17	1745	1816	0.971	0.31	-0.043	-1.691	NaN	-1.676
1026	114-UNSEP1.gel-no Vit 3.tif:18: A-18	2370	3432	1.318	0.585	0.399	-0.773	NaN	-1.2
1027	114-UNSEP1.gel-no Vit 3.tif:19: A-19	1782	11546	0.991	1.969	-0.013	0.977	0	0.962
1028	114-UNSEP1.gel-no Vit 3.tif:20: A-20	1764	10998	0.981	1.875	-0.027	0.907	-0.379	0.906
1029	114-UNSEP1.gel-no Vit 3.tif:21: A-21	1653	1787	0.919	0.305	-0.121	-1.715	NaN	-1.621
1030	114-UNSEP1.gel-no Vit 3.tif:22: A-22	1643	11906	0.914	2.03	-0.13	1.021	0	1.123
1031	114-UNSEP1.gel-no Vit 3.tif:23: A-23	1603	10134	0.892	1.728	-0.165	0.789	0.392	0.926
1032	114-UNSEP1.gel-no Vit 3.tif:24: A-24	1657	1843	0.922	0.314	-0.118	-1.67	NaN	-1.58
1033	114-UNSEP1.gel-no Vit 3.tif:25: B-1	1904	1638	1.059	0.279	0.083	-1.84	NaN	-1.951
1034	114-UNSEP1.gel-no Vit 3.tif:26: B-2	2023	9379	1.125	1.599	0.17	0.677	0.415	0.479
1035	114-UNSEP1.gel-no Vit 3.tif:27: B-3	2507	11197	1.395	1.909	0.48	0.933	-0.363	0.425
1036	114-UNSEP1.gel-no Vit 3.tif:28: B-4	1995	1593	1.11	0.272	0.15	-1.88	NaN	-2.059
1037	114-UNSEP1.gel-no Vit 3.tif:29: B-5	2246	9965	1.249	1.699	0.321	0.765	-0.17	0.416
1038	114-UNSEP1.gel-no Vit 3.tif:30: B-6	2203	9975	1.225	1.701	0.293	0.766	-0.138	0.445
1039	114-UNSEP1.gel-no Vit 3.tif:31: B-7	3519	8060	1.957	1.374	0.969	0.459	0.193	-0.538
1040	114-UNSEP1.gel-no Vit 3.tif:32: B-8	2224	1759	1.237	0.3	0.307	-1.737	NaN	-2.072
1041	114-UNSEP1.gel-no Vit 3.tif:33: B-9	2389	9112	1.329	1.554	0.41	0.636	-0.322	0.197
1042	114-UNSEP1.gel-no Vit 3.tif:34: B-10	1767	1612	0.983	0.275	-0.025	-1.863	NaN	-1.866
1043	114-UNSEP1.gel-no Vit 3.tif:35: B-11	1789	1595	0.995	0.272	-0.007	-1.879	NaN	-1.899
1044	114-UNSEP1.gel-no Vit 3.tif:36: B-12	1933	9303	1.075	1.586	0.105	0.665	-0.087	0.533
1045	114-UNSEP1.gel-no Vit 3.tif:37: B-13	1867	9068	1.039	1.546	0.055	0.629	0.181	0.546
1046	114-UNSEP1.gel-no Vit 3.tif:38: B-14	1887	13430	1.05	2.29	0.07	1.195	0.29	1.097
1047	114-UNSEP1.gel-no Vit 3.tif:39: B-15	1829	8107	1.017	1.382	0.025	0.467	0.503	0.414
1048	114-UNSEP1.gel-no Vit 3.tif:40: B-16	1682	1679	0.936	0.286	-0.096	-1.805	NaN	-1.736
1049	114-UNSEP1.gel-no Vit 3.tif:41: B-17	1591	1660	0.885	0.283	-0.176	-1.821	NaN	-1.673
1050	114-UNSEP1.gel-no Vit 3.tif:42: B-18	2117	12185	1.178	2.077	0.236	1.055	-0.3	0.791
1051	114-UNSEP1.gel-no Vit 3.tif:43: B-19	1596	8436	0.888	1.438	-0.172	0.524	-0.115	0.668
1052	114-UNSEP1.gel-no Vit 3.tif:44: B-20	1759	1714	0.978	0.292	-0.031	-1.775	NaN	-1.771
1053	114-UNSEP1.gel-no Vit 3.tif:45: B-21	1554	9008	0.864	1.536	-0.21	0.619	0.082	0.801
1054	114-UNSEP1.gel-no Vit 3.tif:46: B-22	1474	6716	0.82	1.145	-0.286	0.195	1.17	0.454
1055	114-UNSEP1.gel-no Vit 3.tif:47: B-23	1465	10127	0.815	1.727	-0.295	0.788	0.082	1.055
1056	114-UNSEP1.gel-no Vit 3.tif:48: B-24	1654	1681	0.92	0.287	-0.12	-1.803	NaN	-1.711
1057	114-UNSEP1.gel-no Vit 3.tif:49: C-1	1888	1642	1.05	0.28	0.071	-1.837	NaN	-1.935
1058	114-UNSEP1.gel-no Vit 3.tif:50: C-2	2250	7965	1.252	1.358	0.324	0.441	0.556	0.09
1059	114-UNSEP1.gel-no Vit 3.tif:51: C-3	1771	1574	0.985	0.268	-0.022	-1.898	NaN	-1.904
1060	114-UNSEP1.gel-no Vit 3.tif:52: C-4	2288	8784	1.273	1.498	0.348	0.583	0.322	0.207
1061	114-UNSEP1.gel-no Vit 3.tif:53: C-5	2028	7341	1.128	1.252	0.174	0.324	0.348	0.122
1062	114-UNSEP1.gel-no Vit 3.tif:54: C-6	2000	7488	1.113	1.277	0.154	0.352	0.193	0.171
1063	114-UNSEP1.gel-no Vit 3.tif:55: C-7	1808	1552	1.006	0.265	0.008	-1.918	NaN	-1.954
1064	114-UNSEP1.gel-no Vit 3.tif:56: C-8	2354	9720	1.309	1.657	0.389	0.729	-0.241	0.312
1065	114-UNSEP1.gel-no Vit 3.tif:57: C-9	1776	5385	0.988	0.918	-0.018	-0.123	-0.222	-0.134
1066	114-UNSEP1.gel-no Vit 3.tif:58: C-10	2122	1584	1.18	0.27	0.239	-1.889	NaN	-2.156
1067	114-UNSEP1.gel-no Vit 3.tif:59: C-11	1711	1609	0.952	0.274	-0.071	-1.866	NaN	-1.823
1068	114-UNSEP1.gel-no Vit 3.tif:60: C-12	1661	1581	0.924	0.27	-0.114	-1.891	NaN	-1.805
1069	114-UNSEP1.gel-no Vit 3.tif:61: C-13	1703	6220	0.947	1.06	-0.078	0.085	1.078	0.135
1070	114-UNSEP1.gel-no Vit 3.tif:62: C-14	1807	8936	1.005	1.524	0.007	0.607	0	0.572
1071	114-UNSEP1.gel-no Vit 3.tif:63: C-15	1609	1616	0.895	0.276	-0.16	-1.86	NaN	-1.728
1072	114-UNSEP1.gel-no Vit 3.tif:64: C-16	1993	1688	1.109	0.288	0.149	-1.797	NaN	-1.974
1073	114-UNSEP1.gel-no Vit 3.tif:65: C-17	1605	7366	0.893	1.256	-0.164	0.329	-0.087	0.464
1074	114-UNSEP1.gel-no Vit 3.tif:66: C-18	2063	1681	1.148	0.287	0.199	-1.803	NaN	-2.029
1075	114-UNSEP1.gel-no Vit 3.tif:67: C-19	1573	6141	0.875	1.047	-0.193	0.066	0.348	0.231
1076	114-UNSEP1.gel-no Vit 3.tif:68: C-20	1518	1872	0.844	0.319	-0.244	-1.648	NaN	-1.431
1077	114-UNSEP1.gel-no Vit 3.tif:69: C-21	1541	2074	0.857	0.354	-0.222	-1.5	NaN	-1.305
1078	114-UNSEP1.gel-no Vit 3.tif:70: C-22	1662	7766	0.924	1.324	-0.113	0.405	1.152	0.49
1079	114-UNSEP1.gel-no Vit 3.tif:71: C-23	1455	1845	0.809	0.315	-0.305	-1.669	NaN	-1.391
1080	114-UNSEP1.gel-no Vit 3.tif:72: C-24	1879	1679	1.045	0.286	0.064	-1.805	NaN	-1.896
1081	114-UNSEP1.gel-no Vit 3.tif:73: D-1	2307	1649	1.283	0.281	0.36	-1.831	NaN	-2.218
1082	114-UNSEP1.gel-no Vit 3.tif:74: D-2	2780	8942	1.546	1.525	0.629	0.608	0.241	-0.048
1083	114-UNSEP1.gel-no Vit 3.tif:75: D-3	2011	8813	1.119	1.503	0.162	0.587	-0.263	0.398
1084	114-UNSEP1.gel-no Vit 3.tif:76: D-4	2178	8348	1.212	1.423	0.277	0.509	0.115	0.205
1085	114-UNSEP1.gel-no Vit 3.tif:77: D-5	2168	5690	1.206	0.97	0.27	-0.044	1.147	-0.342
1086	114-UNSEP1.gel-no Vit 3.tif:78: D-6	2246	9369	1.249	1.597	0.321	0.676	0	0.327
1087	114-UNSEP1.gel-no Vit 3.tif:79: D-7	1970	8442	1.096	1.439	0.132	0.525	0	0.365
1088	114-UNSEP1.gel-no Vit 3.tif:80: D-8	2056	9128	1.144	1.556	0.194	0.638	0	0.417
1089	114-UNSEP1.gel-no Vit 3.tif:81: D-9	1711	1558	0.952	0.266	-0.071	-1.913	NaN	-1.869
1090	114-UNSEP1.gel-no Vit 3.tif:82: D-10	1682	1582	0.936	0.27	-0.096	-1.89	NaN	-1.822
1091	114-UNSEP1.gel-no Vit 3.tif:83: D-11	1790	8829	0.996	1.505	-0.006	0.59	1.485	0.568
1092	114-UNSEP1.gel-no Vit 3.tif:84: D-12	1644	1593	0.914	0.272	-0.129	-1.88	NaN	-1.779
1093	114-UNSEP1.gel-no Vit 3.tif:85: D-13	1967	10329	1.094	1.761	0.13	0.816	-0.138	0.659
1094	114-UNSEP1.gel-no Vit 3.tif:86: D-14	1774	8919	0.987	1.521	-0.019	0.605	-0.29	0.596
1095	114-UNSEP1.gel-no Vit 3.tif:87: D-15	1638	9298	0.911	1.585	-0.134	0.665	0.848	0.771
1096	114-UNSEP1.gel-no Vit 3.tif:88: D-16	1906	9002	1.06	1.535	0.084	0.618	-0.126	0.506
1097	114-UNSEP1.gel-no Vit 3.tif:89: D-17	1676	8989	0.932	1.533	-0.101	0.616	0	0.689
1098	114-UNSEP1.gel-no Vit 3.tif:90: D-18	1652	10102	0.919	1.722	-0.122	0.784	0	0.878
1099	114-UNSEP1.gel-no Vit 3.tif:91: D-19	1539	8934	0.856	1.523	-0.224	0.607	0.28	0.803
1100	114-UNSEP1.gel-no Vit 3.tif:92: D-20	1641	11017	0.913	1.878	-0.132	0.909	0	1.013
1101	114-UNSEP1.gel-no Vit 3.tif:93: D-21	1658	1949	0.922	0.332	-0.117	-1.589	NaN	-1.501
1102	114-UNSEP1.gel-no Vit 3.tif:94: D-22	1475	11315	0.82	1.929	-0.285	0.948	0	1.206
1103	114-UNSEP1.gel-no Vit 3.tif:95: D-23	1471	1673	0.818	0.285	-0.289	-1.81	NaN	-1.548
1104	114-UNSEP1.gel-no Vit 3.tif:96: D-24	2226	1756	1.238	0.299	0.308	-1.74	NaN	-2.076
1105	114-UNSEP1.gel-no Vit 3.tif:97: E-1	3046	1580	1.694	0.269	0.761	-1.892	NaN	-2.681
1106	114-UNSEP1.gel-no Vit 3.tif:98: E-2	1917	7224	1.066	1.232	0.093	0.301	-0.126	0.18
1107	114-UNSEP1.gel-no Vit 3.tif:99: E-3	2030	8985	1.129	1.532	0.175	0.615	0.379	0.412
1108	114-UNSEP1.gel-no Vit 3.tif:100: E-4	2253	9426	1.253	1.607	0.326	0.684	-0.152	0.331
1109	114-UNSEP1.gel-no Vit 3.tif:101: E-5	1895	1532	1.054	0.261	0.076	-1.937	NaN	-2.041
1110	114-UNSEP1.gel-no Vit 3.tif:102: E-6	1720	1533	0.957	0.261	-0.064	-1.936	NaN	-1.9
1111	114-UNSEP1.gel-no Vit 3.tif:103: E-7	1876	7088	1.044	1.208	0.061	0.273	0.241	0.184
1112	114-UNSEP1.gel-no Vit 3.tif:104: E-8	1749	1574	0.973	0.268	-0.04	-1.898	NaN	-1.886
1113	114-UNSEP1.gel-no Vit 3.tif:105: E-9	1939	8005	1.079	1.365	0.109	0.449	0.524	0.312
1114	114-UNSEP1.gel-no Vit 3.tif:106: E-10	1681	1675	0.935	0.286	-0.097	-1.808	NaN	-1.739
1115	114-UNSEP1.gel-no Vit 3.tif:107: E-11	1781	6925	0.991	1.181	-0.014	0.24	-0.115	0.225
1116	114-UNSEP1.gel-no Vit 3.tif:108: E-12	1804	6897	1.003	1.176	0.005	0.234	-0.29	0.201
1117	114-UNSEP1.gel-no Vit 3.tif:109: E-13	1838	1594	1.022	0.272	0.032	-1.88	NaN	-1.939
1118	114-UNSEP1.gel-no Vit 3.tif:110: E-14	1626	4246	0.904	0.724	-0.145	-0.466	NaN	-0.349
1119	114-UNSEP1.gel-no Vit 3.tif:111: E-15	1951	9489	1.085	1.618	0.118	0.694	0.585	0.548
1120	114-UNSEP1.gel-no Vit 3.tif:112: E-16	1587	7073	0.883	1.206	-0.18	0.27	0.222	0.422
1121	114-UNSEP1.gel-no Vit 3.tif:113: E-17	2002	11326	1.114	1.931	0.155	0.949	-0.415	0.766
1122	114-UNSEP1.gel-no Vit 3.tif:114: E-18	1571	1687	0.874	0.288	-0.195	-1.798	NaN	-1.631
1123	114-UNSEP1.gel-no Vit 3.tif:115: E-19	1531	1634	0.852	0.279	-0.232	-1.844	NaN	-1.64
1124	114-UNSEP1.gel-no Vit 3.tif:116: E-20	1595	1732	0.887	0.295	-0.173	-1.76	NaN	-1.615
1125	114-UNSEP1.gel-no Vit 3.tif:117: E-21	1824	8965	1.015	1.528	0.021	0.612	-0.29	0.563
1126	114-UNSEP1.gel-no Vit 3.tif:118: E-22	1728	9404	0.961	1.603	-0.057	0.681	0.621	0.71
1127	114-UNSEP1.gel-no Vit 3.tif:119: E-23	1632	9899	0.908	1.688	-0.14	0.755	-0.087	0.867
1128	114-UNSEP1.gel-no Vit 3.tif:120: E-24	2036	6796	1.133	1.159	0.18	0.212	0.807	0.005
1129	114-UNSEP1.gel-no Vit 3.tif:121: F-1	2321	10686	1.291	1.822	0.369	0.865	0	0.469
1130	114-UNSEP1.gel-no Vit 3.tif:122: F-2	2276	8165	1.266	1.392	0.34	0.477	0.28	0.109
1131	114-UNSEP1.gel-no Vit 3.tif:123: F-3	2492	10115	1.386	1.725	0.471	0.786	-0.138	0.287
1132	114-UNSEP1.gel-no Vit 3.tif:124: F-4	1962	2411	1.091	0.411	0.126	-1.283	NaN	-1.437
1133	114-UNSEP1.gel-no Vit 3.tif:125: F-5	1720	2762	0.957	0.471	-0.064	-1.086	1.379	-1.051
1134	114-UNSEP1.gel-no Vit 3.tif:126: F-6	2009	6692	1.118	1.141	0.16	0.19	1.459	0.002
1135	114-UNSEP1.gel-no Vit 3.tif:127: F-7	2045	6421	1.138	1.095	0.186	0.131	1.193	-0.083
1136	114-UNSEP1.gel-no Vit 3.tif:128: F-8	1936	2210	1.077	0.377	0.107	-1.408	NaN	-1.543
1137	114-UNSEP1.gel-no Vit 3.tif:129: F-9	1731	1588	0.963	0.271	-0.055	-1.885	NaN	-1.858
1138	114-UNSEP1.gel-no Vit 3.tif:130: F-10	1818	1595	1.011	0.272	0.016	-1.879	NaN	-1.923
1139	114-UNSEP1.gel-no Vit 3.tif:131: F-11	1746	1604	0.971	0.273	-0.042	-1.871	NaN	-1.856
1140	114-UNSEP1.gel-no Vit 3.tif:132: F-12	1886	1617	1.049	0.276	0.069	-1.859	NaN	-1.956
1141	114-UNSEP1.gel-no Vit 3.tif:133: F-13	3795	1626	2.111	0.277	1.078	-1.851	NaN	-2.957
1142	114-UNSEP1.gel-no Vit 3.tif:134: F-14	1793	3163	0.997	0.539	-0.004	-0.891	NaN	-0.915
1143	114-UNSEP1.gel-no Vit 3.tif:135: F-15	1629	2216	0.906	0.378	-0.142	-1.404	NaN	-1.29
1144	114-UNSEP1.gel-no Vit 3.tif:136: F-16	1565	1637	0.871	0.279	-0.2	-1.841	NaN	-1.669
1145	114-UNSEP1.gel-no Vit 3.tif:137: F-17	1552	1673	0.863	0.285	-0.212	-1.81	NaN	-1.626
1146	114-UNSEP1.gel-no Vit 3.tif:138: F-18	1537	1679	0.855	0.286	-0.226	-1.805	NaN	-1.606
1147	114-UNSEP1.gel-no Vit 3.tif:139: F-19	1736	11123	0.966	1.896	-0.05	0.923	-0.459	0.946
1148	114-UNSEP1.gel-no Vit 3.tif:140: F-20	1674	1738	0.931	0.296	-0.103	-1.755	NaN	-1.68
1149	114-UNSEP1.gel-no Vit 3.tif:141: F-21	1687	11127	0.938	1.897	-0.092	0.924	0.503	0.988
1150	114-UNSEP1.gel-no Vit 3.tif:142: F-22	1643	9814	0.914	1.673	-0.13	0.743	0.322	0.845
1151	114-UNSEP1.gel-no Vit 3.tif:143: F-23	1584	10931	0.881	1.864	-0.183	0.898	0	1.053
1152	114-UNSEP1.gel-no Vit 3.tif:144: F-24	1593	12494	0.886	2.13	-0.174	1.091	-0.379	1.238
1153	114-UNSEP1.gel-no Vit 3.tif:145: G-1	2054	6537	1.143	1.115	0.192	0.156	1.737	-0.064
1154	114-UNSEP1.gel-no Vit 3.tif:146: G-2	2075	8303	1.154	1.416	0.207	0.501	0	0.267
1155	114-UNSEP1.gel-no Vit 3.tif:147: G-3	1780	1691	0.99	0.288	-0.014	-1.794	NaN	-1.808
1156	114-UNSEP1.gel-no Vit 3.tif:148: G-4	2276	1706	1.266	0.291	0.34	-1.782	NaN	-2.15
1157	114-UNSEP1.gel-no Vit 3.tif:149: G-5	1789	1695	0.995	0.289	-0.007	-1.791	NaN	-1.812
1158	114-UNSEP1.gel-no Vit 3.tif:150: G-6	2090	8860	1.163	1.511	0.217	0.595	0	0.35
1159	114-UNSEP1.gel-no Vit 3.tif:151: G-7	2042	7843	1.136	1.337	0.184	0.419	0.126	0.208
1160	114-UNSEP1.gel-no Vit 3.tif:152: G-8	2138	10995	1.189	1.875	0.25	0.907	0	0.629
1161	114-UNSEP1.gel-no Vit 3.tif:153: G-9	1942	9275	1.08	1.581	0.111	0.661	0.1	0.522
1162	114-UNSEP1.gel-no Vit 3.tif:154: G-10	1911	4681	1.063	0.798	0.088	-0.325	0.497	-0.441
1163	114-UNSEP1.gel-no Vit 3.tif:155: G-11	1710	1744	0.951	0.297	-0.072	-1.75	NaN	-1.705
1164	114-UNSEP1.gel-no Vit 3.tif:156: G-12	1787	10245	0.994	1.747	-0.009	0.805	-0.087	0.785
1165	114-UNSEP1.gel-no Vit 3.tif:157: G-13	1722	6953	0.958	1.185	-0.062	0.245	0.644	0.28
1166	114-UNSEP1.gel-no Vit 3.tif:158: G-14	1612	1686	0.897	0.287	-0.157	-1.799	NaN	-1.669
1167	114-UNSEP1.gel-no Vit 3.tif:159: G-15	2259	10416	1.257	1.776	0.329	0.829	-0.322	0.471
1168	114-UNSEP1.gel-no Vit 3.tif:160: G-16	1750	8853	0.973	1.509	-0.039	0.594	0.222	0.605
1169	114-UNSEP1.gel-no Vit 3.tif:161: G-17	1724	7746	0.959	1.321	-0.06	0.401	-0.29	0.434
1170	114-UNSEP1.gel-no Vit 3.tif:162: G-18	1536	1742	0.854	0.297	-0.227	-1.751	NaN	-1.552
1171	114-UNSEP1.gel-no Vit 3.tif:163: G-19	1636	5706	0.91	0.973	-0.136	-0.04	-0.107	0.068
1172	114-UNSEP1.gel-no Vit 3.tif:164: G-20	1739	9773	0.967	1.666	-0.048	0.737	0.126	0.757
1173	114-UNSEP1.gel-no Vit 3.tif:165: G-21	1689	9553	0.94	1.629	-0.09	0.704	0.9	0.766
1174	114-UNSEP1.gel-no Vit 3.tif:166: G-22	1659	9992	0.923	1.704	-0.116	0.769	0.126	0.857
1175	114-UNSEP1.gel-no Vit 3.tif:167: G-23	1651	9817	0.918	1.674	-0.123	0.743	0.585	0.838
1176	114-UNSEP1.gel-no Vit 3.tif:168: G-24	1802	10305	1.002	1.757	0.003	0.813	0.241	0.782
1177	114-UNSEP1.gel-no Vit 3.tif:169: H-1	2251	8427	1.252	1.437	0.324	0.523	-0.241	0.171
1178	114-UNSEP1.gel-no Vit 3.tif:170: H-2	1820	1519	1.012	0.259	0.018	-1.949	NaN	-1.995
1179	114-UNSEP1.gel-no Vit 3.tif:171: H-3	1786	1541	0.993	0.263	-0.009	-1.928	NaN	-1.947
1180	114-UNSEP1.gel-no Vit 3.tif:172: H-4	1795	7063	0.998	1.204	-0.002	0.268	0.28	0.242
1181	114-UNSEP1.gel-no Vit 3.tif:173: H-5	1911	8181	1.063	1.395	0.088	0.48	0	0.364
1182	114-UNSEP1.gel-no Vit 3.tif:174: H-6	1820	3602	1.012	0.614	0.018	-0.703	1.945	-0.749
1183	114-UNSEP1.gel-no Vit 3.tif:175: H-7	1874	6254	1.042	1.066	0.06	0.093	1	0.005
1184	114-UNSEP1.gel-no Vit 3.tif:176: H-8	1701	1598	0.946	0.272	-0.08	-1.876	NaN	-1.824
1185	114-UNSEP1.gel-no Vit 3.tif:177: H-9	1707	6336	0.95	1.08	-0.075	0.111	0.115	0.158
1186	114-UNSEP1.gel-no Vit 3.tif:178: H-10	1816	1588	1.01	0.271	0.015	-1.885	NaN	-1.927
1187	114-UNSEP1.gel-no Vit 3.tif:179: H-11	1940	9348	1.079	1.594	0.11	0.672	0.678	0.535
1188	114-UNSEP1.gel-no Vit 3.tif:180: H-12	1800	7599	1.001	1.296	0.002	0.374	-0.126	0.344
1189	114-UNSEP1.gel-no Vit 3.tif:181: H-13	1614	1613	0.898	0.275	-0.156	-1.862	NaN	-1.735
1190	114-UNSEP1.gel-no Vit 3.tif:182: H-14	1718	1629	0.956	0.278	-0.065	-1.848	NaN	-1.811
1191	114-UNSEP1.gel-no Vit 3.tif:183: H-15	1569	6045	0.873	1.031	-0.196	0.044	0.771	0.212
1192	114-UNSEP1.gel-no Vit 3.tif:184: H-16	1566	1637	0.871	0.279	-0.199	-1.841	NaN	-1.67
1193	114-UNSEP1.gel-no Vit 3.tif:185: H-17	1760	10664	0.979	1.818	-0.031	0.862	0	0.865
1194	114-UNSEP1.gel-no Vit 3.tif:186: H-18	1564	1640	0.87	0.28	-0.201	-1.839	NaN	-1.665
1195	114-UNSEP1.gel-no Vit 3.tif:187: H-19	1956	8030	1.088	1.369	0.122	0.453	0.918	0.304
1196	114-UNSEP1.gel-no Vit 3.tif:188: H-20	1496	1646	0.832	0.281	-0.265	-1.833	NaN	-1.596
1197	114-UNSEP1.gel-no Vit 3.tif:189: H-21	1597	4476	0.888	0.763	-0.171	-0.39	1.379	-0.247
1198	114-UNSEP1.gel-no Vit 3.tif:190: H-22	1482	2606	0.824	0.444	-0.279	-1.17	1.732	-0.92
1199	114-UNSEP1.gel-no Vit 3.tif:191: H-23	1649	10575	0.917	1.803	-0.125	0.85	0	0.947
1200	114-UNSEP1.gel-no Vit 3.tif:192: H-24	1500	8969	0.834	1.529	-0.261	0.613	0.485	0.846
1201	114-UNSEP1.gel-no Vit 3.tif:193: I-1	2403	7503	1.337	1.279	0.419	0.355	1.054	-0.091
1202	114-UNSEP1.gel-no Vit 3.tif:194: I-2	1851	7114	1.03	1.213	0.042	0.278	1.684	0.208
1203	114-UNSEP1.gel-no Vit 3.tif:195: I-3	2391	9710	1.33	1.655	0.411	0.727	-0.241	0.288
1204	114-UNSEP1.gel-no Vit 3.tif:196: I-4	1769	1533	0.984	0.261	-0.023	-1.936	NaN	-1.94
1205	114-UNSEP1.gel-no Vit 3.tif:197: I-5	1865	6179	1.037	1.053	0.053	0.075	0.922	-0.006
1206	114-UNSEP1.gel-no Vit 3.tif:198: I-6	1973	9893	1.097	1.687	0.134	0.754	-0.138	0.592
1207	114-UNSEP1.gel-no Vit 3.tif:199: I-7	1708	1640	0.95	0.28	-0.074	-1.839	NaN	-1.793
1208	114-UNSEP1.gel-no Vit 3.tif:200: I-8	1942	5259	1.08	0.897	0.111	-0.157	0.862	-0.297
1209	114-UNSEP1.gel-no Vit 3.tif:201: I-9	1699	1671	0.945	0.285	-0.082	-1.812	NaN	-1.758
1210	114-UNSEP1.gel-no Vit 3.tif:202: I-10	1811	1637	1.007	0.279	0.011	-1.841	NaN	-1.88
1211	114-UNSEP1.gel-no Vit 3.tif:203: I-11	1696	1912	0.943	0.326	-0.084	-1.617	NaN	-1.561
1212	114-UNSEP1.gel-no Vit 3.tif:204: I-12	1777	7998	0.988	1.364	-0.017	0.447	0.621	0.436
1213	114-UNSEP1.gel-no Vit 3.tif:205: I-13	1992	10031	1.108	1.71	0.148	0.774	-0.17	0.598
1214	114-UNSEP1.gel-no Vit 3.tif:206: I-14	1745	7900	0.971	1.347	-0.043	0.43	1.652	0.445
1215	114-UNSEP1.gel-no Vit 3.tif:207: I-15	1693	6411	0.942	1.093	-0.087	0.128	1.17	0.187
1216	114-UNSEP1.gel-no Vit 3.tif:208: I-16	2400	9253	1.335	1.578	0.417	0.658	0.263	0.213
1217	114-UNSEP1.gel-no Vit 3.tif:209: I-17	1547	6481	0.861	1.105	-0.217	0.144	0.755	0.333
1218	114-UNSEP1.gel-no Vit 3.tif:210: I-18	1536	1621	0.854	0.276	-0.227	-1.855	NaN	-1.656
1219	114-UNSEP1.gel-no Vit 3.tif:211: I-19	1510	1646	0.84	0.281	-0.252	-1.833	NaN	-1.609
1220	114-UNSEP1.gel-no Vit 3.tif:212: I-20	1544	1659	0.859	0.283	-0.22	-1.822	NaN	-1.63
1221	114-UNSEP1.gel-no Vit 3.tif:213: I-21	1519	1630	0.845	0.278	-0.243	-1.847	NaN	-1.632
1222	114-UNSEP1.gel-no Vit 3.tif:214: I-22	1485	1665	0.826	0.284	-0.276	-1.817	NaN	-1.569
1223	114-UNSEP1.gel-no Vit 3.tif:215: I-23	1560	1774	0.868	0.302	-0.205	-1.725	NaN	-1.548
1224	114-UNSEP1.gel-no Vit 3.tif:216: I-24	1591	10006	0.885	1.706	-0.176	0.771	0.778	0.919
1225	114-UNSEP1.gel-no Vit 3.tif:217: J-1	2260	8210	1.257	1.4	0.33	0.485	0.305	0.127
1226	114-UNSEP1.gel-no Vit 3.tif:218: J-2	1742	1519	0.969	0.259	-0.045	-1.949	NaN	-1.932
1227	114-UNSEP1.gel-no Vit 3.tif:219: J-3	1775	5235	0.987	0.893	-0.018	-0.164	0.181	-0.174
1228	114-UNSEP1.gel-no Vit 3.tif:220: J-4	2028	6667	1.128	1.137	0.174	0.185	-0.126	-0.017
1229	114-UNSEP1.gel-no Vit 3.tif:221: J-5	2046	9855	1.138	1.68	0.187	0.749	0.28	0.534
1230	114-UNSEP1.gel-no Vit 3.tif:222: J-6	1702	1583	0.947	0.27	-0.079	-1.89	NaN	-1.838
1231	114-UNSEP1.gel-no Vit 3.tif:223: J-7	1784	7667	0.992	1.307	-0.011	0.386	0.193	0.37
1232	114-UNSEP1.gel-no Vit 3.tif:224: J-8	1924	1602	1.07	0.273	0.098	-1.872	NaN	-1.998
1233	114-UNSEP1.gel-no Vit 3.tif:225: J-9	1841	2146	1.024	0.366	0.034	-1.451	NaN	-1.513
1234	114-UNSEP1.gel-no Vit 3.tif:226: J-10	1662	1826	0.924	0.311	-0.113	-1.684	NaN	-1.598
1235	114-UNSEP1.gel-no Vit 3.tif:227: J-11	1664	1680	0.926	0.286	-0.112	-1.804	NaN	-1.72
1236	114-UNSEP1.gel-no Vit 3.tif:228: J-12	1616	1624	0.899	0.277	-0.154	-1.853	NaN	-1.727
1237	114-UNSEP1.gel-no Vit 3.tif:229: J-13	2099	10027	1.168	1.71	0.224	0.774	0.115	0.522
1238	114-UNSEP1.gel-no Vit 3.tif:230: J-14	1900	8527	1.057	1.454	0.08	0.54	0	0.432
1239	114-UNSEP1.gel-no Vit 3.tif:231: J-15	1662	1747	0.924	0.298	-0.113	-1.747	NaN	-1.662
1240	114-UNSEP1.gel-no Vit 3.tif:232: J-16	1683	1624	0.936	0.277	-0.095	-1.853	NaN	-1.785
1241	114-UNSEP1.gel-no Vit 3.tif:233: J-17	1847	9896	1.027	1.687	0.039	0.755	-0.138	0.688
1242	114-UNSEP1.gel-no Vit 3.tif:234: J-18	1573	9618	0.875	1.64	-0.193	0.714	-0.115	0.878
1243	114-UNSEP1.gel-no Vit 3.tif:235: J-19	1585	9675	0.882	1.65	-0.182	0.722	0.503	0.876
1244	114-UNSEP1.gel-no Vit 3.tif:236: J-20	1484	8530	0.825	1.454	-0.277	0.54	0.678	0.789
1245	114-UNSEP1.gel-no Vit 3.tif:237: J-21	1628	1632	0.906	0.278	-0.143	-1.846	NaN	-1.73
1246	114-UNSEP1.gel-no Vit 3.tif:238: J-22	1622	1697	0.902	0.289	-0.148	-1.789	NaN	-1.669
1247	114-UNSEP1.gel-no Vit 3.tif:239: J-23	1470	10346	0.818	1.764	-0.29	0.819	0.093	1.081
1248	114-UNSEP1.gel-no Vit 3.tif:240: J-24	1647	1657	0.916	0.283	-0.126	-1.824	NaN	-1.725
1249	114-UNSEP1.gel-no Vit 3.tif:241: K-1	1849	1546	1.029	0.264	0.041	-1.924	NaN	-1.992
1250	114-UNSEP1.gel-no Vit 3.tif:242: K-2	1761	1505	0.98	0.257	-0.03	-1.962	NaN	-1.961
1251	114-UNSEP1.gel-no Vit 3.tif:243: K-3	2262	1716	1.258	0.293	0.331	-1.773	NaN	-2.132
1252	114-UNSEP1.gel-no Vit 3.tif:244: K-4	2106	8906	1.171	1.518	0.228	0.603	-0.115	0.346
1253	114-UNSEP1.gel-no Vit 3.tif:245: K-5	1698	1536	0.945	0.262	-0.082	-1.933	NaN	-1.879
1254	114-UNSEP1.gel-no Vit 3.tif:246: K-6	2030	8061	1.129	1.374	0.175	0.459	0	0.256
1255	114-UNSEP1.gel-no Vit 3.tif:247: K-7	1721	1578	0.957	0.269	-0.063	-1.894	NaN	-1.859
1256	114-UNSEP1.gel-no Vit 3.tif:248: K-8	2556	1580	1.422	0.269	0.508	-1.892	NaN	-2.428
1257	114-UNSEP1.gel-no Vit 3.tif:249: K-9	1745	5469	0.971	0.932	-0.043	-0.101	1.322	-0.086
1258	114-UNSEP1.gel-no Vit 3.tif:250: K-10	1725	1599	0.96	0.273	-0.06	-1.875	NaN	-1.843
1259	114-UNSEP1.gel-no Vit 3.tif:251: K-11	2053	8759	1.142	1.493	0.192	0.579	0.652	0.359
1260	114-UNSEP1.gel-no Vit 3.tif:252: K-12	1657	1618	0.922	0.276	-0.118	-1.858	NaN	-1.768
1261	114-UNSEP1.gel-no Vit 3.tif:253: K-13	2134	9408	1.187	1.604	0.247	0.682	-0.415	0.406
1262	114-UNSEP1.gel-no Vit 3.tif:254: K-14	1909	10239	1.062	1.746	0.087	0.804	0.206	0.689
1263	114-UNSEP1.gel-no Vit 3.tif:255: K-15	1576	1603	0.877	0.273	-0.19	-1.871	NaN	-1.709
1264	114-UNSEP1.gel-no Vit 3.tif:256: K-16	1559	1613	0.867	0.275	-0.206	-1.862	NaN	-1.685
1265	114-UNSEP1.gel-no Vit 3.tif:257: K-17	1607	9300	0.894	1.586	-0.162	0.665	0.107	0.799
1266	114-UNSEP1.gel-no Vit 3.tif:258: K-18	1624	9831	0.903	1.676	-0.147	0.745	-0.126	0.864
1267	114-UNSEP1.gel-no Vit 3.tif:259: K-19	1714	9089	0.953	1.55	-0.069	0.632	0.447	0.673
1268	114-UNSEP1.gel-no Vit 3.tif:260: K-20	1507	1603	0.838	0.273	-0.255	-1.871	NaN	-1.645
1269	114-UNSEP1.gel-no Vit 3.tif:261: K-21	1558	10392	0.867	1.772	-0.206	0.825	-0.263	1.004
1270	114-UNSEP1.gel-no Vit 3.tif:262: K-22	1523	1611	0.847	0.275	-0.239	-1.864	NaN	-1.653
1271	114-UNSEP1.gel-no Vit 3.tif:263: K-23	6187	1637	3.442	0.279	1.783	-1.841	NaN	-3.652
1272	114-UNSEP1.gel-no Vit 3.tif:264: K-24	1659	10088	0.923	1.72	-0.116	0.782	0.794	0.87
1273	114-UNSEP1.gel-no Vit 3.tif:265: L-1	2057	1558	1.144	0.266	0.194	-1.913	NaN	-2.135
1274	114-UNSEP1.gel-no Vit 3.tif:266: L-2	1806	1501	1.005	0.256	0.007	-1.966	NaN	-2.001
1275	114-UNSEP1.gel-no Vit 3.tif:267: L-3	2320	9463	1.291	1.613	0.368	0.69	-0.193	0.294
1276	114-UNSEP1.gel-no Vit 3.tif:268: L-4	1837	1528	1.022	0.261	0.031	-1.941	NaN	-2
1277	114-UNSEP1.gel-no Vit 3.tif:269: L-5	1984	7979	1.104	1.36	0.142	0.444	0.181	0.274
1278	114-UNSEP1.gel-no Vit 3.tif:270: L-6	2001	1608	1.113	0.274	0.155	-1.867	NaN	-2.049
1279	114-UNSEP1.gel-no Vit 3.tif:271: L-7	2293	9138	1.275	1.558	0.351	0.64	-0.241	0.261
1280	114-UNSEP1.gel-no Vit 3.tif:272: L-8	2038	7461	1.134	1.272	0.181	0.347	-0.241	0.138
1281	114-UNSEP1.gel-no Vit 3.tif:273: L-9	2029	7976	1.129	1.36	0.175	0.443	1.147	0.241
1282	114-UNSEP1.gel-no Vit 3.tif:274: L-10	1713	8436	0.953	1.438	-0.07	0.524	0.322	0.566
1283	114-UNSEP1.gel-no Vit 3.tif:275: L-11	1903	1588	1.059	0.271	0.082	-1.885	NaN	-1.995
1284	114-UNSEP1.gel-no Vit 3.tif:276: L-12	2051	8969	1.141	1.529	0.19	0.613	0.206	0.395
1285	114-UNSEP1.gel-no Vit 3.tif:277: L-13	2143	9963	1.192	1.699	0.253	0.764	-0.29	0.483
1286	114-UNSEP1.gel-no Vit 3.tif:278: L-14	1601	1633	0.891	0.278	-0.167	-1.845	NaN	-1.705
1287	114-UNSEP1.gel-no Vit 3.tif:279: L-15	1580	1600	0.879	0.273	-0.186	-1.874	NaN	-1.716
1288	114-UNSEP1.gel-no Vit 3.tif:280: L-16	1903	1920	1.059	0.327	0.082	-1.611	NaN	-1.721
1289	114-UNSEP1.gel-no Vit 3.tif:281: L-17	1749	11128	0.973	1.897	-0.04	0.924	0.206	0.936
1290	114-UNSEP1.gel-no Vit 3.tif:282: L-18	1527	9936	0.849	1.694	-0.235	0.76	-0.126	0.968
1291	114-UNSEP1.gel-no Vit 3.tif:283: L-19	1624	9959	0.903	1.698	-0.147	0.764	0.547	0.883
1292	114-UNSEP1.gel-no Vit 3.tif:284: L-20	2501	7710	1.391	1.315	0.476	0.395	-0.241	-0.11
1293	114-UNSEP1.gel-no Vit 3.tif:285: L-21	1553	1695	0.864	0.289	-0.211	-1.791	NaN	-1.608
1294	114-UNSEP1.gel-no Vit 3.tif:286: L-22	1622	9187	0.902	1.566	-0.148	0.647	0.893	0.768
1295	114-UNSEP1.gel-no Vit 3.tif:287: L-23	1541	1701	0.857	0.29	-0.222	-1.786	NaN	-1.591
1296	114-UNSEP1.gel-no Vit 3.tif:288: L-24	1537	10993	0.855	1.874	-0.226	0.906	0	1.104
1297	114-UNSEP1.gel-no Vit 3.tif:289: M-1	1841	1568	1.024	0.267	0.034	-1.903	NaN	-1.965
1298	114-UNSEP1.gel-no Vit 3.tif:290: M-2	1917	1518	1.066	0.259	0.093	-1.95	NaN	-2.071
1299	114-UNSEP1.gel-no Vit 3.tif:291: M-3	1738	1835	0.967	0.313	-0.049	-1.676	NaN	-1.656
1300	114-UNSEP1.gel-no Vit 3.tif:292: M-4	1718	1534	0.956	0.262	-0.065	-1.935	NaN	-1.897
1301	114-UNSEP1.gel-no Vit 3.tif:293: M-5	2240	11032	1.246	1.881	0.317	0.911	-0.1	0.566
1302	114-UNSEP1.gel-no Vit 3.tif:294: M-6	1951	1573	1.085	0.268	0.118	-1.899	NaN	-2.045
1303	114-UNSEP1.gel-no Vit 3.tif:295: M-7	3545	1561	1.972	0.266	0.98	-1.91	NaN	-2.917
1304	114-UNSEP1.gel-no Vit 3.tif:296: M-8	1700	1756	0.946	0.299	-0.081	-1.74	NaN	-1.687
1305	114-UNSEP1.gel-no Vit 3.tif:297: M-9	2104	6532	1.17	1.114	0.227	0.155	1.837	-0.1
1306	114-UNSEP1.gel-no Vit 3.tif:298: M-10	1756	1606	0.977	0.274	-0.034	-1.869	NaN	-1.863
1307	114-UNSEP1.gel-no Vit 3.tif:299: M-11	2090	1585	1.163	0.27	0.217	-1.888	NaN	-2.133
1308	114-UNSEP1.gel-no Vit 3.tif:300: M-12	1627	1654	0.905	0.282	-0.144	-1.826	NaN	-1.71
1309	114-UNSEP1.gel-no Vit 3.tif:301: M-13	1628	1606	0.906	0.274	-0.143	-1.869	NaN	-1.754
1310	114-UNSEP1.gel-no Vit 3.tif:302: M-14	1592	1999	0.886	0.341	-0.175	-1.553	NaN	-1.405
1311	114-UNSEP1.gel-no Vit 3.tif:303: M-15	1879	8581	1.045	1.463	0.064	0.549	-0.263	0.457
1312	114-UNSEP1.gel-no Vit 3.tif:304: M-16	1560	1588	0.868	0.271	-0.205	-1.885	NaN	-1.708
1313	114-UNSEP1.gel-no Vit 3.tif:305: M-17	1556	1691	0.866	0.288	-0.208	-1.794	NaN	-1.614
1314	114-UNSEP1.gel-no Vit 3.tif:306: M-18	1856	1814	1.032	0.309	0.046	-1.693	NaN	-1.767
1315	114-UNSEP1.gel-no Vit 3.tif:307: M-19	1729	7663	0.962	1.306	-0.056	0.386	-0.29	0.414
1316	114-UNSEP1.gel-no Vit 3.tif:308: M-20	1486	1603	0.827	0.273	-0.275	-1.871	NaN	-1.625
1317	114-UNSEP1.gel-no Vit 3.tif:309: M-21	1579	1620	0.878	0.276	-0.187	-1.856	NaN	-1.697
1318	114-UNSEP1.gel-no Vit 3.tif:310: M-22	1889	1620	1.051	0.276	0.071	-1.856	NaN	-1.956
1319	114-UNSEP1.gel-no Vit 3.tif:311: M-23	1777	9719	0.988	1.657	-0.017	0.729	0.107	0.717
1320	114-UNSEP1.gel-no Vit 3.tif:312: M-24	2275	1691	1.265	0.288	0.34	-1.794	NaN	-2.162
1321	114-UNSEP1.gel-no Vit 3.tif:313: N-1	1834	1521	1.02	0.259	0.029	-1.947	NaN	-2.004
1322	114-UNSEP1.gel-no Vit 3.tif:314: N-2	1796	1494	0.999	0.255	-0.001	-1.973	NaN	-2
1323	114-UNSEP1.gel-no Vit 3.tif:315: N-3	1807	1537	1.005	0.262	0.007	-1.932	NaN	-1.967
1324	114-UNSEP1.gel-no Vit 3.tif:316: N-4	2059	7573	1.145	1.291	0.196	0.369	-0.1	0.145
1325	114-UNSEP1.gel-no Vit 3.tif:317: N-5	2231	9046	1.241	1.542	0.311	0.625	-0.107	0.286
1326	114-UNSEP1.gel-no Vit 3.tif:318: N-6	2147	8230	1.194	1.403	0.256	0.489	0.363	0.205
1327	114-UNSEP1.gel-no Vit 3.tif:319: N-7	1917	1728	1.066	0.295	0.093	-1.763	NaN	-1.884
1328	114-UNSEP1.gel-no Vit 3.tif:320: N-8	1660	2233	0.923	0.381	-0.115	-1.393	NaN	-1.306
1329	114-UNSEP1.gel-no Vit 3.tif:321: N-9	1990	7143	1.107	1.218	0.147	0.284	-0.126	0.11
1330	114-UNSEP1.gel-no Vit 3.tif:322: N-10	2022	10459	1.125	1.783	0.17	0.834	-0.115	0.637
1331	114-UNSEP1.gel-no Vit 3.tif:323: N-11	2061	8258	1.146	1.408	0.197	0.494	0.547	0.269
1332	114-UNSEP1.gel-no Vit 3.tif:324: N-12	2158	7775	1.2	1.326	0.264	0.407	0	0.115
1333	114-UNSEP1.gel-no Vit 3.tif:325: N-13	1867	7384	1.039	1.259	0.055	0.332	0.737	0.25
1334	114-UNSEP1.gel-no Vit 3.tif:326: N-14	1615	1588	0.898	0.271	-0.155	-1.885	NaN	-1.758
1335	114-UNSEP1.gel-no Vit 3.tif:327: N-15	1697	9874	0.944	1.683	-0.083	0.751	-0.206	0.807
1336	114-UNSEP1.gel-no Vit 3.tif:328: N-16	1618	8587	0.9	1.464	-0.152	0.55	0.652	0.674
1337	114-UNSEP1.gel-no Vit 3.tif:329: N-17	1533	2788	0.853	0.475	-0.23	-1.073	1.933	-0.871
1338	114-UNSEP1.gel-no Vit 3.tif:330: N-18	1522	2106	0.847	0.359	-0.24	-1.478	NaN	-1.265
1339	114-UNSEP1.gel-no Vit 3.tif:331: N-19	1656	7948	0.921	1.355	-0.118	0.438	0.222	0.529
1340	114-UNSEP1.gel-no Vit 3.tif:332: N-20	1546	6497	0.86	1.108	-0.218	0.148	-0.415	0.337
1341	114-UNSEP1.gel-no Vit 3.tif:333: N-21	2499	9572	1.39	1.632	0.475	0.707	-0.126	0.204
1342	114-UNSEP1.gel-no Vit 3.tif:334: N-22	2068	9010	1.15	1.536	0.202	0.619	-0.348	0.389
1343	114-UNSEP1.gel-no Vit 3.tif:335: N-23	1479	8911	0.823	1.519	-0.282	0.603	0.28	0.857
1344	114-UNSEP1.gel-no Vit 3.tif:336: N-24	1692	1644	0.941	0.28	-0.087	-1.835	NaN	-1.775
1345	116-UNSEP1.gel-no Vit 2-1.tif:1: A-1	2143	1770	1.121	0.246	0.165	-2.021	NaN	-2.192
1346	116-UNSEP1.gel-no Vit 2-1.tif:2: A-2	2323	6948	1.215	0.967	0.282	-0.048	0.907	-0.335
1347	116-UNSEP1.gel-no Vit 2-1.tif:3: A-3	2720	13145	1.423	1.829	0.509	0.871	0	0.357
1348	116-UNSEP1.gel-no Vit 2-1.tif:4: A-4	1914	1737	1.001	0.242	0.002	-2.048	NaN	-2.056
1349	116-UNSEP1.gel-no Vit 2-1.tif:5: A-5	1928	1760	1.009	0.245	0.013	-2.029	NaN	-2.047
1350	116-UNSEP1.gel-no Vit 2-1.tif:6: A-6	2295	8927	1.201	1.242	0.264	0.313	0	0.044
1351	116-UNSEP1.gel-no Vit 2-1.tif:7: A-7	2218	8294	1.161	1.154	0.215	0.207	0	-0.013
1352	116-UNSEP1.gel-no Vit 2-1.tif:8: A-8	2491	11176	1.303	1.555	0.382	0.637	0	0.25
1353	116-UNSEP1.gel-no Vit 2-1.tif:9: A-9	1940	1826	1.015	0.254	0.022	-1.976	NaN	-2.003
1354	116-UNSEP1.gel-no Vit 2-1.tif:10: A-10	1912	1836	1	0.256	0.0006289	-1.968	NaN	-1.974
1355	116-UNSEP1.gel-no Vit 2-1.tif:11: A-11	1925	1926	1.007	0.268	0.01	-1.899	NaN	-1.915
1356	116-UNSEP1.gel-no Vit 2-1.tif:12: A-12	1937	1873	1.014	0.261	0.019	-1.94	NaN	-1.964
1357	116-UNSEP1.gel-no Vit 2-1.tif:13: A-13	1941	1948	1.016	0.271	0.022	-1.883	NaN	-1.911
1358	116-UNSEP1.gel-no Vit 2-1.tif:14: A-14	3064	12043	1.603	1.676	0.681	0.745	-0.1	0.059
1359	116-UNSEP1.gel-no Vit 2-1.tif:15: A-15	2697	14621	1.411	2.035	0.497	1.025	-0.206	0.523
1360	116-UNSEP1.gel-no Vit 2-1.tif:16: A-16	2382	13168	1.246	1.833	0.318	0.874	0.263	0.551
1361	116-UNSEP1.gel-no Vit 2-1.tif:17: A-17	1957	2173	1.024	0.302	0.034	-1.725	NaN	-1.765
1362	116-UNSEP1.gel-no Vit 2-1.tif:18: A-18	1927	2344	1.008	0.326	0.012	-1.616	NaN	-1.633
1363	116-UNSEP1.gel-no Vit 2-1.tif:19: A-19	1908	2086	0.998	0.29	-0.002	-1.784	NaN	-1.787
1364	116-UNSEP1.gel-no Vit 2-1.tif:20: A-20	1914	2077	1.001	0.289	0.002	-1.791	NaN	-1.798
1365	116-UNSEP1.gel-no Vit 2-1.tif:21: A-21	2055	2109	1.075	0.294	0.105	-1.768	NaN	-1.878
1366	116-UNSEP1.gel-no Vit 2-1.tif:22: A-22	2049	2117	1.072	0.295	0.1	-1.763	NaN	-1.869
1367	116-UNSEP1.gel-no Vit 2-1.tif:23: A-23	1841	2115	0.963	0.294	-0.054	-1.764	NaN	-1.716
1368	116-UNSEP1.gel-no Vit 2-1.tif:24: A-24	1871	2184	0.979	0.304	-0.031	-1.718	NaN	-1.693
1369	116-UNSEP1.gel-no Vit 2-1.tif:25: B-1	1814	1589	0.949	0.221	-0.075	-2.177	NaN	-2.107
1370	116-UNSEP1.gel-no Vit 2-1.tif:26: B-2	1925	1598	1.007	0.222	0.01	-2.169	NaN	-2.184
1371	116-UNSEP1.gel-no Vit 2-1.tif:27: B-3	1778	1607	0.93	0.224	-0.104	-2.161	NaN	-2.062
1372	116-UNSEP1.gel-no Vit 2-1.tif:28: B-4	1821	1698	0.953	0.236	-0.07	-2.081	NaN	-2.017
1373	116-UNSEP1.gel-no Vit 2-1.tif:29: B-5	2087	1716	1.092	0.239	0.127	-2.066	NaN	-2.198
1374	116-UNSEP1.gel-no Vit 2-1.tif:30: B-6	2080	1724	1.088	0.24	0.122	-2.059	NaN	-2.187
1375	116-UNSEP1.gel-no Vit 2-1.tif:31: B-7	2011	1876	1.052	0.261	0.073	-1.937	NaN	-2.016
1376	116-UNSEP1.gel-no Vit 2-1.tif:32: B-8	1973	1900	1.032	0.264	0.046	-1.919	NaN	-1.97
1377	116-UNSEP1.gel-no Vit 2-1.tif:33: B-9	1907	1726	0.998	0.24	-0.003	-2.058	NaN	-2.06
1378	116-UNSEP1.gel-no Vit 2-1.tif:34: B-10	1859	1874	0.973	0.261	-0.04	-1.939	NaN	-1.904
1379	116-UNSEP1.gel-no Vit 2-1.tif:35: B-11	1766	1809	0.924	0.252	-0.114	-1.99	NaN	-1.881
1380	116-UNSEP1.gel-no Vit 2-1.tif:36: B-12	2513	1755	1.315	0.244	0.395	-2.034	NaN	-2.434
1381	116-UNSEP1.gel-no Vit 2-1.tif:37: B-13	1754	1768	0.918	0.246	-0.124	-2.023	NaN	-1.904
1382	116-UNSEP1.gel-no Vit 2-1.tif:38: B-14	1795	1804	0.939	0.251	-0.09	-1.994	NaN	-1.909
1383	116-UNSEP1.gel-no Vit 2-1.tif:39: B-15	2076	1805	1.086	0.251	0.119	-1.993	NaN	-2.118
1384	116-UNSEP1.gel-no Vit 2-1.tif:40: B-16	1764	1933	0.923	0.269	-0.116	-1.894	NaN	-1.784
1385	116-UNSEP1.gel-no Vit 2-1.tif:41: B-17	2849	1984	1.491	0.276	0.576	-1.857	NaN	-2.438
1386	116-UNSEP1.gel-no Vit 2-1.tif:42: B-18	1734	1871	0.907	0.26	-0.14	-1.941	NaN	-1.806
1387	116-UNSEP1.gel-no Vit 2-1.tif:43: B-19	1768	1944	0.925	0.271	-0.112	-1.886	NaN	-1.779
1388	116-UNSEP1.gel-no Vit 2-1.tif:44: B-20	1742	1982	0.911	0.276	-0.134	-1.858	NaN	-1.73
1389	116-UNSEP1.gel-no Vit 2-1.tif:45: B-21	1748	2084	0.915	0.29	-0.129	-1.786	NaN	-1.662
1390	116-UNSEP1.gel-no Vit 2-1.tif:46: B-22	1698	1908	0.888	0.266	-0.171	-1.913	NaN	-1.748
1391	116-UNSEP1.gel-no Vit 2-1.tif:47: B-23	1697	1924	0.888	0.268	-0.171	-1.901	NaN	-1.735
1392	116-UNSEP1.gel-no Vit 2-1.tif:48: B-24	1761	2053	0.921	0.286	-0.118	-1.807	NaN	-1.694
1393	116-UNSEP1.gel-no Vit 2-1.tif:49: C-1	1826	1585	0.955	0.221	-0.066	-2.181	NaN	-2.12
1394	116-UNSEP1.gel-no Vit 2-1.tif:50: C-2	1727	1559	0.904	0.217	-0.146	-2.204	NaN	-2.063
1395	116-UNSEP1.gel-no Vit 2-1.tif:51: C-3	1748	1613	0.915	0.224	-0.129	-2.155	NaN	-2.032
1396	116-UNSEP1.gel-no Vit 2-1.tif:52: C-4	1735	1626	0.908	0.226	-0.14	-2.144	NaN	-2.009
1397	116-UNSEP1.gel-no Vit 2-1.tif:53: C-5	1837	1624	0.961	0.226	-0.057	-2.145	NaN	-2.094
1398	116-UNSEP1.gel-no Vit 2-1.tif:54: C-6	1894	1676	0.991	0.233	-0.013	-2.1	NaN	-2.092
1399	116-UNSEP1.gel-no Vit 2-1.tif:55: C-7	1872	1685	0.98	0.235	-0.03	-2.092	NaN	-2.068
1400	116-UNSEP1.gel-no Vit 2-1.tif:56: C-8	1766	1793	0.924	0.25	-0.114	-2.003	NaN	-1.894
1401	116-UNSEP1.gel-no Vit 2-1.tif:57: C-9	1826	1729	0.955	0.241	-0.066	-2.055	NaN	-1.994
1402	116-UNSEP1.gel-no Vit 2-1.tif:58: C-10	1829	1854	0.957	0.258	-0.063	-1.954	NaN	-1.896
1403	116-UNSEP1.gel-no Vit 2-1.tif:59: C-11	1768	1765	0.925	0.246	-0.112	-2.025	NaN	-1.918
1404	116-UNSEP1.gel-no Vit 2-1.tif:60: C-12	1922	1733	1.006	0.241	0.008	-2.052	NaN	-2.065
1405	116-UNSEP1.gel-no Vit 2-1.tif:61: C-13	1732	2909	0.906	0.405	-0.142	-1.305	NaN	-1.168
1406	116-UNSEP1.gel-no Vit 2-1.tif:62: C-14	1714	1803	0.897	0.251	-0.157	-1.995	NaN	-1.843
1407	116-UNSEP1.gel-no Vit 2-1.tif:63: C-15	10346	1817	5.413	0.253	2.437	-1.983	NaN	-4.425
1408	116-UNSEP1.gel-no Vit 2-1.tif:64: C-16	1962	1870	1.027	0.26	0.038	-1.942	NaN	-1.985
1409	116-UNSEP1.gel-no Vit 2-1.tif:65: C-17	2104	1991	1.101	0.277	0.139	-1.852	NaN	-1.995
1410	116-UNSEP1.gel-no Vit 2-1.tif:66: C-18	1724	1955	0.902	0.272	-0.149	-1.878	NaN	-1.734
1411	116-UNSEP1.gel-no Vit 2-1.tif:67: C-19	1744	1955	0.913	0.272	-0.132	-1.878	NaN	-1.751
1412	116-UNSEP1.gel-no Vit 2-1.tif:68: C-20	2189	2219	1.145	0.309	0.196	-1.695	NaN	-1.896
1413	116-UNSEP1.gel-no Vit 2-1.tif:69: C-21	1685	2424	0.882	0.337	-0.182	-1.568	NaN	-1.391
1414	116-UNSEP1.gel-no Vit 2-1.tif:70: C-22	1669	1967	0.873	0.274	-0.195	-1.869	NaN	-1.679
1415	116-UNSEP1.gel-no Vit 2-1.tif:71: C-23	1680	1995	0.879	0.278	-0.186	-1.849	NaN	-1.668
1416	116-UNSEP1.gel-no Vit 2-1.tif:72: C-24	1748	2180	0.915	0.303	-0.129	-1.721	NaN	-1.597
1417	116-UNSEP1.gel-no Vit 2-1.tif:73: D-1	1791	1595	0.937	0.222	-0.094	-2.171	NaN	-2.083
1418	116-UNSEP1.gel-no Vit 2-1.tif:74: D-2	1740	1740	0.91	0.242	-0.135	-2.046	NaN	-1.916
1419	116-UNSEP1.gel-no Vit 2-1.tif:75: D-3	1926	1811	1.008	0.252	0.011	-1.988	NaN	-2.005
1420	116-UNSEP1.gel-no Vit 2-1.tif:76: D-4	1786	1666	0.935	0.232	-0.098	-2.109	NaN	-2.016
1421	116-UNSEP1.gel-no Vit 2-1.tif:77: D-5	2304	1692	1.206	0.235	0.27	-2.086	NaN	-2.361
1422	116-UNSEP1.gel-no Vit 2-1.tif:78: D-6	1840	1714	0.963	0.239	-0.055	-2.068	NaN	-2.018
1423	116-UNSEP1.gel-no Vit 2-1.tif:79: D-7	2387	12091	1.249	1.683	0.321	0.751	-0.126	0.425
1424	116-UNSEP1.gel-no Vit 2-1.tif:80: D-8	2086	1727	1.091	0.24	0.126	-2.057	NaN	-2.188
1425	116-UNSEP1.gel-no Vit 2-1.tif:81: D-9	1825	1672	0.955	0.233	-0.067	-2.103	NaN	-2.042
1426	116-UNSEP1.gel-no Vit 2-1.tif:82: D-10	1886	1703	0.987	0.237	-0.019	-2.077	NaN	-2.063
1427	116-UNSEP1.gel-no Vit 2-1.tif:83: D-11	1804	1953	0.944	0.272	-0.083	-1.879	NaN	-1.801
1428	116-UNSEP1.gel-no Vit 2-1.tif:84: D-12	1769	1891	0.926	0.263	-0.112	-1.926	NaN	-1.82
1429	116-UNSEP1.gel-no Vit 2-1.tif:85: D-13	1743	1758	0.912	0.245	-0.133	-2.031	NaN	-1.903
1430	116-UNSEP1.gel-no Vit 2-1.tif:86: D-14	1742	2156	0.911	0.3	-0.134	-1.737	NaN	-1.608
1431	116-UNSEP1.gel-no Vit 2-1.tif:87: D-15	1727	1878	0.904	0.261	-0.146	-1.936	NaN	-1.795
1432	116-UNSEP1.gel-no Vit 2-1.tif:88: D-16	1727	1978	0.904	0.275	-0.146	-1.861	NaN	-1.72
1433	116-UNSEP1.gel-no Vit 2-1.tif:89: D-17	3437	2009	1.798	0.28	0.847	-1.839	NaN	-2.69
1434	116-UNSEP1.gel-no Vit 2-1.tif:90: D-18	1716	1958	0.898	0.273	-0.155	-1.876	NaN	-1.725
1435	116-UNSEP1.gel-no Vit 2-1.tif:91: D-19	2135	1908	1.117	0.266	0.16	-1.913	NaN	-2.078
1436	116-UNSEP1.gel-no Vit 2-1.tif:92: D-20	1702	1899	0.891	0.264	-0.167	-1.92	NaN	-1.758
1437	116-UNSEP1.gel-no Vit 2-1.tif:93: D-21	1896	2058	0.992	0.286	-0.011	-1.804	NaN	-1.797
1438	116-UNSEP1.gel-no Vit 2-1.tif:94: D-22	1689	1904	0.884	0.265	-0.178	-1.916	NaN	-1.743
1439	116-UNSEP1.gel-no Vit 2-1.tif:95: D-23	1763	2024	0.922	0.282	-0.116	-1.828	NaN	-1.717
1440	116-UNSEP1.gel-no Vit 2-1.tif:96: D-24	1804	1977	0.944	0.275	-0.083	-1.862	NaN	-1.784
1441	116-UNSEP1.gel-no Vit 2-1.tif:97: E-1	1874	1652	0.981	0.23	-0.028	-2.121	NaN	-2.098
1442	116-UNSEP1.gel-no Vit 2-1.tif:98: E-2	2762	1957	1.445	0.272	0.531	-1.876	NaN	-2.413
1443	116-UNSEP1.gel-no Vit 2-1.tif:99: E-3	2958	1626	1.548	0.226	0.63	-2.144	NaN	-2.779
1444	116-UNSEP1.gel-no Vit 2-1.tif:100: E-4	1819	1623	0.952	0.226	-0.071	-2.146	NaN	-2.08
1445	116-UNSEP1.gel-no Vit 2-1.tif:101: E-5	1958	1709	1.025	0.238	0.035	-2.072	NaN	-2.112
1446	116-UNSEP1.gel-no Vit 2-1.tif:102: E-6	2122	1802	1.11	0.251	0.151	-1.995	NaN	-2.152
1447	116-UNSEP1.gel-no Vit 2-1.tif:103: E-7	1745	1706	0.913	0.237	-0.131	-2.074	NaN	-1.948
1448	116-UNSEP1.gel-no Vit 2-1.tif:104: E-8	2074	2091	1.085	0.291	0.118	-1.781	NaN	-1.904
1449	116-UNSEP1.gel-no Vit 2-1.tif:105: E-9	1793	1660	0.938	0.231	-0.092	-2.114	NaN	-2.027
1450	116-UNSEP1.gel-no Vit 2-1.tif:106: E-10	1917	1715	1.003	0.239	0.004	-2.067	NaN	-2.076
1451	116-UNSEP1.gel-no Vit 2-1.tif:107: E-11	1744	2837	0.913	0.395	-0.132	-1.341	NaN	-1.214
1452	116-UNSEP1.gel-no Vit 2-1.tif:108: E-12	1727	1710	0.904	0.238	-0.146	-2.071	NaN	-1.93
1453	116-UNSEP1.gel-no Vit 2-1.tif:109: E-13	1813	1725	0.949	0.24	-0.076	-2.058	NaN	-1.988
1454	116-UNSEP1.gel-no Vit 2-1.tif:110: E-14	3363	1749	1.76	0.243	0.815	-2.039	NaN	-2.859
1455	116-UNSEP1.gel-no Vit 2-1.tif:111: E-15	1756	1885	0.919	0.262	-0.122	-1.93	NaN	-1.813
1456	116-UNSEP1.gel-no Vit 2-1.tif:112: E-16	1735	1850	0.908	0.257	-0.14	-1.958	NaN	-1.823
1457	116-UNSEP1.gel-no Vit 2-1.tif:113: E-17	2698	1820	1.412	0.253	0.497	-1.981	NaN	-2.484
1458	116-UNSEP1.gel-no Vit 2-1.tif:114: E-18	3249	2123	1.7	0.295	0.766	-1.759	NaN	-2.53
1459	116-UNSEP1.gel-no Vit 2-1.tif:115: E-19	1921	1988	1.005	0.277	0.007	-1.854	NaN	-1.866
1460	116-UNSEP1.gel-no Vit 2-1.tif:116: E-20	2391	12294	1.251	1.711	0.323	0.775	-0.241	0.447
1461	116-UNSEP1.gel-no Vit 2-1.tif:117: E-21	1695	2661	0.887	0.37	-0.173	-1.433	NaN	-1.265
1462	116-UNSEP1.gel-no Vit 2-1.tif:118: E-22	1683	1912	0.881	0.266	-0.183	-1.91	NaN	-1.732
1463	116-UNSEP1.gel-no Vit 2-1.tif:119: E-23	2507	1947	1.312	0.271	0.392	-1.884	NaN	-2.28
1464	116-UNSEP1.gel-no Vit 2-1.tif:120: E-24	1804	2048	0.944	0.285	-0.083	-1.811	NaN	-1.733
1465	116-UNSEP1.gel-no Vit 2-1.tif:121: F-1	2492	1612	1.304	0.224	0.383	-2.156	NaN	-2.544
1466	116-UNSEP1.gel-no Vit 2-1.tif:122: F-2	2915	12915	1.525	1.797	0.609	0.846	-0.138	0.232
1467	116-UNSEP1.gel-no Vit 2-1.tif:123: F-3	2859	1628	1.496	0.227	0.581	-2.142	NaN	-2.728
1468	116-UNSEP1.gel-no Vit 2-1.tif:124: F-4	1835	1698	0.96	0.236	-0.059	-2.081	NaN	-2.028
1469	116-UNSEP1.gel-no Vit 2-1.tif:125: F-5	2186	1723	1.144	0.24	0.194	-2.06	NaN	-2.259
1470	116-UNSEP1.gel-no Vit 2-1.tif:126: F-6	1837	1732	0.961	0.241	-0.057	-2.053	NaN	-2.001
1471	116-UNSEP1.gel-no Vit 2-1.tif:127: F-7	1759	1665	0.92	0.232	-0.12	-2.11	NaN	-1.995
1472	116-UNSEP1.gel-no Vit 2-1.tif:128: F-8	1982	1674	1.037	0.233	0.053	-2.102	NaN	-2.159
1473	116-UNSEP1.gel-no Vit 2-1.tif:129: F-9	1875	2195	0.981	0.305	-0.028	-1.711	NaN	-1.688
1474	116-UNSEP1.gel-no Vit 2-1.tif:130: F-10	1944	1738	1.017	0.242	0.025	-2.048	NaN	-2.077
1475	116-UNSEP1.gel-no Vit 2-1.tif:131: F-11	1747	1701	0.914	0.237	-0.13	-2.079	NaN	-1.954
1476	116-UNSEP1.gel-no Vit 2-1.tif:132: F-12	1893	2537	0.99	0.353	-0.014	-1.502	NaN	-1.493
1477	116-UNSEP1.gel-no Vit 2-1.tif:133: F-13	1789	1771	0.936	0.246	-0.095	-2.02	NaN	-1.93
1478	116-UNSEP1.gel-no Vit 2-1.tif:134: F-14	1727	1896	0.904	0.264	-0.146	-1.922	NaN	-1.781
1479	116-UNSEP1.gel-no Vit 2-1.tif:135: F-15	2075	1807	1.086	0.251	0.119	-1.991	NaN	-2.115
1480	116-UNSEP1.gel-no Vit 2-1.tif:136: F-16	1832	1958	0.959	0.273	-0.061	-1.876	NaN	-1.82
1481	116-UNSEP1.gel-no Vit 2-1.tif:137: F-17	1806	1835	0.945	0.255	-0.082	-1.969	NaN	-1.893
1482	116-UNSEP1.gel-no Vit 2-1.tif:138: F-18	2193	12522	1.147	1.743	0.198	0.801	-0.126	0.598
1483	116-UNSEP1.gel-no Vit 2-1.tif:139: F-19	1983	11383	1.038	1.584	0.053	0.664	-0.415	0.605
1484	116-UNSEP1.gel-no Vit 2-1.tif:140: F-20	2370	12685	1.24	1.765	0.31	0.82	-0.263	0.504
1485	116-UNSEP1.gel-no Vit 2-1.tif:141: F-21	3484	15370	1.823	2.139	0.866	1.097	-0.206	0.226
1486	116-UNSEP1.gel-no Vit 2-1.tif:142: F-22	3239	14083	1.695	1.96	0.761	0.971	-0.17	0.205
1487	116-UNSEP1.gel-no Vit 2-1.tif:143: F-23	2499	15922	1.308	2.216	0.387	1.148	-0.322	0.756
1488	116-UNSEP1.gel-no Vit 2-1.tif:144: F-24	2105	10313	1.101	1.435	0.139	0.521	-0.17	0.377
1489	116-UNSEP1.gel-no Vit 2-1.tif:145: G-1	2264	11399	1.185	1.586	0.244	0.666	0	0.416
1490	116-UNSEP1.gel-no Vit 2-1.tif:146: G-2	2829	9185	1.48	1.278	0.566	0.354	-0.138	-0.217
1491	116-UNSEP1.gel-no Vit 2-1.tif:147: G-3	2104	1925	1.101	0.268	0.139	-1.9	NaN	-2.044
1492	116-UNSEP1.gel-no Vit 2-1.tif:148: G-4	2313	11153	1.21	1.552	0.275	0.634	-0.29	0.354
1493	116-UNSEP1.gel-no Vit 2-1.tif:149: G-5	1821	1618	0.953	0.225	-0.07	-2.151	NaN	-2.086
1494	116-UNSEP1.gel-no Vit 2-1.tif:150: G-6	1764	1649	0.923	0.229	-0.116	-2.123	NaN	-2.013
1495	116-UNSEP1.gel-no Vit 2-1.tif:151: G-7	2514	13875	1.315	1.931	0.396	0.949	0	0.549
1496	116-UNSEP1.gel-no Vit 2-1.tif:152: G-8	1802	1702	0.943	0.237	-0.085	-2.078	NaN	-1.998
1497	116-UNSEP1.gel-no Vit 2-1.tif:153: G-9	2707	12664	1.416	1.762	0.502	0.818	-0.17	0.31
1498	116-UNSEP1.gel-no Vit 2-1.tif:154: G-10	1969	1818	1.03	0.253	0.043	-1.983	NaN	-2.031
1499	116-UNSEP1.gel-no Vit 2-1.tif:155: G-11	2163	1754	1.132	0.244	0.179	-2.034	NaN	-2.218
1500	116-UNSEP1.gel-no Vit 2-1.tif:156: G-12	2354	10901	1.232	1.517	0.301	0.601	-0.107	0.296
1501	116-UNSEP1.gel-no Vit 2-1.tif:157: G-13	1795	1706	0.939	0.237	-0.09	-2.074	NaN	-1.989
1502	116-UNSEP1.gel-no Vit 2-1.tif:158: G-14	1991	9771	1.042	1.36	0.059	0.443	0	0.379
1503	116-UNSEP1.gel-no Vit 2-1.tif:159: G-15	2015	11213	1.054	1.561	0.076	0.642	0	0.561
1504	116-UNSEP1.gel-no Vit 2-1.tif:160: G-16	1826	1974	0.955	0.275	-0.066	-1.864	NaN	-1.803
1505	116-UNSEP1.gel-no Vit 2-1.tif:161: G-17	1985	11878	1.039	1.653	0.055	0.725	0.28	0.665
1506	116-UNSEP1.gel-no Vit 2-1.tif:162: G-18	1697	1907	0.888	0.265	-0.171	-1.914	NaN	-1.747
1507	116-UNSEP1.gel-no Vit 2-1.tif:163: G-19	1951	11124	1.021	1.548	0.03	0.631	-0.17	0.596
1508	116-UNSEP1.gel-no Vit 2-1.tif:164: G-20	2568	14239	1.344	1.982	0.426	0.987	-0.241	0.555
1509	116-UNSEP1.gel-no Vit 2-1.tif:165: G-21	1819	1985	0.952	0.276	-0.071	-1.856	NaN	-1.79
1510	116-UNSEP1.gel-no Vit 2-1.tif:166: G-22	1763	2020	0.922	0.281	-0.116	-1.831	NaN	-1.719
1511	116-UNSEP1.gel-no Vit 2-1.tif:167: G-23	1682	3047	0.88	0.424	-0.184	-1.238	NaN	-1.059
1512	116-UNSEP1.gel-no Vit 2-1.tif:168: G-24	2133	14161	1.116	1.971	0.158	0.979	-0.107	0.815
1513	116-UNSEP1.gel-no Vit 2-1.tif:169: H-1	1840	1571	0.963	0.219	-0.055	-2.193	NaN	-2.144
1514	116-UNSEP1.gel-no Vit 2-1.tif:170: H-2	1752	1555	0.917	0.216	-0.125	-2.208	NaN	-2.088
1515	116-UNSEP1.gel-no Vit 2-1.tif:171: H-3	2407	12339	1.259	1.717	0.333	0.78	0.107	0.442
1516	116-UNSEP1.gel-no Vit 2-1.tif:172: H-4	1987	1593	1.04	0.222	0.056	-2.173	NaN	-2.235
1517	116-UNSEP1.gel-no Vit 2-1.tif:173: H-5	2002	8930	1.048	1.243	0.067	0.314	0.126	0.241
1518	116-UNSEP1.gel-no Vit 2-1.tif:174: H-6	1733	1728	0.907	0.24	-0.141	-2.056	NaN	-1.92
1519	116-UNSEP1.gel-no Vit 2-1.tif:175: H-7	1745	2013	0.913	0.28	-0.131	-1.836	NaN	-1.71
1520	116-UNSEP1.gel-no Vit 2-1.tif:176: H-8	1878	1792	0.983	0.249	-0.025	-2.003	NaN	-1.983
1521	116-UNSEP1.gel-no Vit 2-1.tif:177: H-9	1766	1813	0.924	0.252	-0.114	-1.987	NaN	-1.878
1522	116-UNSEP1.gel-no Vit 2-1.tif:178: H-10	1780	1811	0.931	0.252	-0.103	-1.988	NaN	-1.891
1523	116-UNSEP1.gel-no Vit 2-1.tif:179: H-11	1850	1831	0.968	0.255	-0.047	-1.972	NaN	-1.931
1524	116-UNSEP1.gel-no Vit 2-1.tif:180: H-12	1748	1751	0.915	0.244	-0.129	-2.037	NaN	-1.913
1525	116-UNSEP1.gel-no Vit 2-1.tif:181: H-13	2723	12215	1.425	1.7	0.511	0.766	0	0.25
1526	116-UNSEP1.gel-no Vit 2-1.tif:182: H-14	2309	1732	1.208	0.241	0.273	-2.053	NaN	-2.331
1527	116-UNSEP1.gel-no Vit 2-1.tif:183: H-15	1834	1917	0.96	0.267	-0.059	-1.906	NaN	-1.852
1528	116-UNSEP1.gel-no Vit 2-1.tif:184: H-16	1715	1898	0.897	0.264	-0.156	-1.921	NaN	-1.769
1529	116-UNSEP1.gel-no Vit 2-1.tif:185: H-17	1696	1920	0.887	0.267	-0.172	-1.904	NaN	-1.737
1530	116-UNSEP1.gel-no Vit 2-1.tif:186: H-18	1703	1932	0.891	0.269	-0.166	-1.895	NaN	-1.734
1531	116-UNSEP1.gel-no Vit 2-1.tif:187: H-19	1680	1884	0.879	0.262	-0.186	-1.931	NaN	-1.75
1532	116-UNSEP1.gel-no Vit 2-1.tif:188: H-20	1681	1910	0.88	0.266	-0.185	-1.911	NaN	-1.731
1533	116-UNSEP1.gel-no Vit 2-1.tif:189: H-21	2562	1893	1.341	0.263	0.423	-1.924	NaN	-2.352
1534	116-UNSEP1.gel-no Vit 2-1.tif:190: H-22	2044	1904	1.07	0.265	0.097	-1.916	NaN	-2.018
1535	116-UNSEP1.gel-no Vit 2-1.tif:191: H-23	1826	3436	0.955	0.478	-0.066	-1.064	NaN	-1.004
1536	116-UNSEP1.gel-no Vit 2-1.tif:192: H-24	1754	2119	0.918	0.295	-0.124	-1.762	NaN	-1.643
1537	116-UNSEP1.gel-no Vit 2-1.tif:193: I-1	2173	11262	1.137	1.567	0.185	0.648	-0.193	0.458
1538	116-UNSEP1.gel-no Vit 2-1.tif:194: I-2	1802	1521	0.943	0.212	-0.085	-2.24	NaN	-2.16
1539	116-UNSEP1.gel-no Vit 2-1.tif:195: I-3	1807	1577	0.945	0.219	-0.081	-2.188	NaN	-2.112
1540	116-UNSEP1.gel-no Vit 2-1.tif:196: I-4	2315	12762	1.211	1.776	0.277	0.829	-0.17	0.547
1541	116-UNSEP1.gel-no Vit 2-1.tif:197: I-5	1798	1607	0.941	0.224	-0.088	-2.161	NaN	-2.078
1542	116-UNSEP1.gel-no Vit 2-1.tif:198: I-6	1757	1651	0.919	0.23	-0.121	-2.122	NaN	-2.006
1543	116-UNSEP1.gel-no Vit 2-1.tif:199: I-7	1814	1709	0.949	0.238	-0.075	-2.072	NaN	-2.002
1544	116-UNSEP1.gel-no Vit 2-1.tif:200: I-8	1849	1832	0.967	0.255	-0.048	-1.972	NaN	-1.929
1545	116-UNSEP1.gel-no Vit 2-1.tif:201: I-9	1740	1717	0.91	0.239	-0.135	-2.065	NaN	-1.935
1546	116-UNSEP1.gel-no Vit 2-1.tif:202: I-10	1956	1753	1.023	0.244	0.033	-2.035	NaN	-2.074
1547	116-UNSEP1.gel-no Vit 2-1.tif:203: I-11	1742	1812	0.911	0.252	-0.134	-1.987	NaN	-1.859
1548	116-UNSEP1.gel-no Vit 2-1.tif:204: I-12	1918	1771	1.004	0.246	0.005	-2.02	NaN	-2.031
1549	116-UNSEP1.gel-no Vit 2-1.tif:205: I-13	1708	1822	0.894	0.254	-0.162	-1.98	NaN	-1.823
1550	116-UNSEP1.gel-no Vit 2-1.tif:206: I-14	1696	1697	0.887	0.236	-0.172	-2.082	NaN	-1.915
1551	116-UNSEP1.gel-no Vit 2-1.tif:207: I-15	1997	6414	1.045	0.893	0.063	-0.164	0.837	-0.232
1552	116-UNSEP1.gel-no Vit 2-1.tif:208: I-16	2320	13670	1.214	1.903	0.28	0.928	-0.263	0.643
1553	116-UNSEP1.gel-no Vit 2-1.tif:209: I-17	1680	1869	0.879	0.26	-0.186	-1.943	NaN	-1.762
1554	116-UNSEP1.gel-no Vit 2-1.tif:210: I-18	1718	1791	0.899	0.249	-0.154	-2.004	NaN	-1.856
1555	116-UNSEP1.gel-no Vit 2-1.tif:211: I-19	1721	1797	0.9	0.25	-0.151	-1.999	NaN	-1.853
1556	116-UNSEP1.gel-no Vit 2-1.tif:212: I-20	1691	2057	0.885	0.286	-0.177	-1.804	NaN	-1.633
1557	116-UNSEP1.gel-no Vit 2-1.tif:213: I-21	1753	1801	0.917	0.251	-0.125	-1.996	NaN	-1.877
1558	116-UNSEP1.gel-no Vit 2-1.tif:214: I-22	3508	1826	1.836	0.254	0.876	-1.976	NaN	-2.858
1559	116-UNSEP1.gel-no Vit 2-1.tif:215: I-23	1781	3607	0.932	0.502	-0.102	-0.994	NaN	-0.898
1560	116-UNSEP1.gel-no Vit 2-1.tif:216: I-24	1719	2496	0.899	0.347	-0.153	-1.525	NaN	-1.378
1561	116-UNSEP1.gel-no Vit 2-1.tif:217: J-1	1918	1593	1.004	0.222	0.005	-2.173	NaN	-2.184
1562	116-UNSEP1.gel-no Vit 2-1.tif:218: J-2	1759	1637	0.92	0.228	-0.12	-2.134	NaN	-2.019
1563	116-UNSEP1.gel-no Vit 2-1.tif:219: J-3	1801	1532	0.942	0.213	-0.086	-2.23	NaN	-2.149
1564	116-UNSEP1.gel-no Vit 2-1.tif:220: J-4	1853	1590	0.97	0.221	-0.045	-2.176	NaN	-2.137
1565	116-UNSEP1.gel-no Vit 2-1.tif:221: J-5	1754	1628	0.918	0.227	-0.124	-2.142	NaN	-2.023
1566	116-UNSEP1.gel-no Vit 2-1.tif:222: J-6	1737	1636	0.909	0.228	-0.138	-2.135	NaN	-2.002
1567	116-UNSEP1.gel-no Vit 2-1.tif:223: J-7	2018	1691	1.056	0.235	0.078	-2.087	NaN	-2.171
1568	116-UNSEP1.gel-no Vit 2-1.tif:224: J-8	1711	1891	0.895	0.263	-0.16	-1.926	NaN	-1.771
1569	116-UNSEP1.gel-no Vit 2-1.tif:225: J-9	1727	1703	0.904	0.237	-0.146	-2.077	NaN	-1.936
1570	116-UNSEP1.gel-no Vit 2-1.tif:226: J-10	2557	11901	1.338	1.656	0.42	0.728	-0.17	0.303
1571	116-UNSEP1.gel-no Vit 2-1.tif:227: J-11	1685	1704	0.882	0.237	-0.182	-2.076	NaN	-1.9
1572	116-UNSEP1.gel-no Vit 2-1.tif:228: J-12	1684	2522	0.881	0.351	-0.183	-1.51	NaN	-1.333
1573	116-UNSEP1.gel-no Vit 2-1.tif:229: J-13	1698	4534	0.888	0.631	-0.171	-0.664	NaN	-0.499
1574	116-UNSEP1.gel-no Vit 2-1.tif:230: J-14	1695	1745	0.887	0.243	-0.173	-2.042	NaN	-1.874
1575	116-UNSEP1.gel-no Vit 2-1.tif:231: J-15	1707	1706	0.893	0.237	-0.163	-2.074	NaN	-1.917
1576	116-UNSEP1.gel-no Vit 2-1.tif:232: J-16	1684	1810	0.881	0.252	-0.183	-1.989	NaN	-1.812
1577	116-UNSEP1.gel-no Vit 2-1.tif:233: J-17	1661	1750	0.869	0.244	-0.202	-2.038	NaN	-1.84
1578	116-UNSEP1.gel-no Vit 2-1.tif:234: J-18	1675	1816	0.876	0.253	-0.19	-1.984	NaN	-1.799
1579	116-UNSEP1.gel-no Vit 2-1.tif:235: J-19	2442	12930	1.278	1.8	0.354	0.848	-0.515	0.489
1580	116-UNSEP1.gel-no Vit 2-1.tif:236: J-20	1750	2061	0.916	0.287	-0.127	-1.802	NaN	-1.68
1581	116-UNSEP1.gel-no Vit 2-1.tif:237: J-21	1649	1886	0.863	0.262	-0.213	-1.93	NaN	-1.722
1582	116-UNSEP1.gel-no Vit 2-1.tif:238: J-22	3353	13547	1.754	1.885	0.811	0.915	-0.322	0.099
1583	116-UNSEP1.gel-no Vit 2-1.tif:239: J-23	1641	2254	0.859	0.314	-0.22	-1.673	NaN	-1.458
1584	116-UNSEP1.gel-no Vit 2-1.tif:240: J-24	2118	15454	1.108	2.151	0.148	1.105	-0.181	0.951
1585	116-UNSEP1.gel-no Vit 2-1.tif:241: K-1	2377	12052	1.244	1.677	0.315	0.746	-0.138	0.426
1586	116-UNSEP1.gel-no Vit 2-1.tif:242: K-2	2393	11104	1.252	1.545	0.324	0.628	0	0.298
1587	116-UNSEP1.gel-no Vit 2-1.tif:243: K-3	1706	1572	0.893	0.219	-0.164	-2.192	NaN	-2.034
1588	116-UNSEP1.gel-no Vit 2-1.tif:244: K-4	2047	11002	1.071	1.531	0.099	0.615	0	0.51
1589	116-UNSEP1.gel-no Vit 2-1.tif:245: K-5	2477	10056	1.296	1.4	0.374	0.485	0	0.106
1590	116-UNSEP1.gel-no Vit 2-1.tif:246: K-6	2580	10433	1.35	1.452	0.433	0.538	-0.193	0.1
1591	116-UNSEP1.gel-no Vit 2-1.tif:247: K-7	2390	11281	1.251	1.57	0.323	0.651	0	0.323
1592	116-UNSEP1.gel-no Vit 2-1.tif:248: K-8	1798	1685	0.941	0.235	-0.088	-2.092	NaN	-2.009
1593	116-UNSEP1.gel-no Vit 2-1.tif:249: K-9	1716	1703	0.898	0.237	-0.155	-2.077	NaN	-1.927
1594	116-UNSEP1.gel-no Vit 2-1.tif:250: K-10	1706	1671	0.893	0.233	-0.164	-2.104	NaN	-1.946
1595	116-UNSEP1.gel-no Vit 2-1.tif:251: K-11	1691	1742	0.885	0.242	-0.177	-2.044	NaN	-1.873
1596	116-UNSEP1.gel-no Vit 2-1.tif:252: K-12	1708	1693	0.894	0.236	-0.162	-2.085	NaN	-1.928
1597	116-UNSEP1.gel-no Vit 2-1.tif:253: K-13	1744	1689	0.913	0.235	-0.132	-2.089	NaN	-1.962
1598	116-UNSEP1.gel-no Vit 2-1.tif:254: K-14	1733	1879	0.907	0.262	-0.141	-1.935	NaN	-1.799
1599	116-UNSEP1.gel-no Vit 2-1.tif:255: K-15	2241	1736	1.173	0.242	0.23	-2.049	NaN	-2.284
1600	116-UNSEP1.gel-no Vit 2-1.tif:256: K-16	2418	13312	1.265	1.853	0.339	0.89	-0.193	0.545
1601	116-UNSEP1.gel-no Vit 2-1.tif:257: K-17	1675	1759	0.876	0.245	-0.19	-2.03	NaN	-1.845
1602	116-UNSEP1.gel-no Vit 2-1.tif:258: K-18	1716	1870	0.898	0.26	-0.155	-1.942	NaN	-1.792
1603	116-UNSEP1.gel-no Vit 2-1.tif:259: K-19	1700	2148	0.89	0.299	-0.169	-1.742	NaN	-1.578
1604	116-UNSEP1.gel-no Vit 2-1.tif:260: K-20	1858	11273	0.972	1.569	-0.041	0.65	0.241	0.685
1605	116-UNSEP1.gel-no Vit 2-1.tif:261: K-21	1690	10150	0.884	1.413	-0.177	0.498	-0.087	0.671
1606	116-UNSEP1.gel-no Vit 2-1.tif:262: K-22	3390	11495	1.774	1.6	0.827	0.678	0.644	-0.154
1607	116-UNSEP1.gel-no Vit 2-1.tif:263: K-23	2422	16109	1.267	2.242	0.342	1.165	-0.3	0.818
1608	116-UNSEP1.gel-no Vit 2-1.tif:264: K-24	1768	8369	0.925	1.165	-0.112	0.22	0.762	0.327
1609	116-UNSEP1.gel-no Vit 2-1.tif:265: L-1	2207	9997	1.155	1.391	0.208	0.476	0	0.264
1610	116-UNSEP1.gel-no Vit 2-1.tif:266: L-2	1734	1554	0.907	0.216	-0.14	-2.209	NaN	-2.074
1611	116-UNSEP1.gel-no Vit 2-1.tif:267: L-3	2170	11118	1.135	1.547	0.183	0.63	-0.152	0.441
1612	116-UNSEP1.gel-no Vit 2-1.tif:268: L-4	1759	1611	0.92	0.224	-0.12	-2.157	NaN	-2.043
1613	116-UNSEP1.gel-no Vit 2-1.tif:269: L-5	1736	1583	0.908	0.22	-0.139	-2.182	NaN	-2.049
1614	116-UNSEP1.gel-no Vit 2-1.tif:270: L-6	2489	11820	1.302	1.645	0.381	0.718	-0.126	0.332
1615	116-UNSEP1.gel-no Vit 2-1.tif:271: L-7	2147	8601	1.123	1.197	0.168	0.259	0	0.086
1616	116-UNSEP1.gel-no Vit 2-1.tif:272: L-8	1696	1760	0.887	0.245	-0.172	-2.029	NaN	-1.862
1617	116-UNSEP1.gel-no Vit 2-1.tif:273: L-9	1781	1860	0.932	0.259	-0.102	-1.95	NaN	-1.853
1618	116-UNSEP1.gel-no Vit 2-1.tif:274: L-10	2298	10339	1.202	1.439	0.266	0.525	0	0.254
1619	116-UNSEP1.gel-no Vit 2-1.tif:275: L-11	2237	10416	1.17	1.45	0.227	0.536	-0.193	0.303
1620	116-UNSEP1.gel-no Vit 2-1.tif:276: L-12	2130	9939	1.115	1.383	0.156	0.468	-0.17	0.307
1621	116-UNSEP1.gel-no Vit 2-1.tif:277: L-13	2136	12140	1.118	1.69	0.16	0.757	-0.17	0.591
1622	116-UNSEP1.gel-no Vit 2-1.tif:278: L-14	2507	13973	1.312	1.945	0.392	0.96	-0.241	0.563
1623	116-UNSEP1.gel-no Vit 2-1.tif:279: L-15	1808	1736	0.946	0.242	-0.08	-2.049	NaN	-1.974
1624	116-UNSEP1.gel-no Vit 2-1.tif:280: L-16	1681	1736	0.88	0.242	-0.185	-2.049	NaN	-1.869
1625	116-UNSEP1.gel-no Vit 2-1.tif:281: L-17	2545	14074	1.332	1.959	0.413	0.97	-0.107	0.552
1626	116-UNSEP1.gel-no Vit 2-1.tif:282: L-18	1666	1928	0.872	0.268	-0.198	-1.898	NaN	-1.705
1627	116-UNSEP1.gel-no Vit 2-1.tif:283: L-19	1647	1828	0.862	0.254	-0.215	-1.975	NaN	-1.765
1628	116-UNSEP1.gel-no Vit 2-1.tif:284: L-20	1677	1782	0.877	0.248	-0.189	-2.012	NaN	-1.828
1629	116-UNSEP1.gel-no Vit 2-1.tif:285: L-21	1669	1791	0.873	0.249	-0.195	-2.004	NaN	-1.814
1630	116-UNSEP1.gel-no Vit 2-1.tif:286: L-22	1786	1839	0.935	0.256	-0.098	-1.966	NaN	-1.874
1631	116-UNSEP1.gel-no Vit 2-1.tif:287: L-23	1712	1852	0.896	0.258	-0.159	-1.956	NaN	-1.802
1632	116-UNSEP1.gel-no Vit 2-1.tif:288: L-24	2090	1992	1.094	0.277	0.129	-1.851	NaN	-1.985
1633	116-UNSEP1.gel-no Vit 2-1.tif:289: M-1	1783	1525	0.933	0.212	-0.1	-2.236	NaN	-2.141
1634	116-UNSEP1.gel-no Vit 2-1.tif:290: M-2	1755	1586	0.918	0.221	-0.123	-2.18	NaN	-2.062
1635	116-UNSEP1.gel-no Vit 2-1.tif:291: M-3	1727	1544	0.904	0.215	-0.146	-2.218	NaN	-2.077
1636	116-UNSEP1.gel-no Vit 2-1.tif:292: M-4	2042	10943	1.068	1.523	0.096	0.607	-0.126	0.506
1637	116-UNSEP1.gel-no Vit 2-1.tif:293: M-5	1796	1565	0.94	0.218	-0.09	-2.199	NaN	-2.114
1638	116-UNSEP1.gel-no Vit 2-1.tif:294: M-6	1749	1578	0.915	0.22	-0.128	-2.187	NaN	-2.064
1639	116-UNSEP1.gel-no Vit 2-1.tif:295: M-7	2416	10534	1.264	1.466	0.338	0.552	1	0.209
1640	116-UNSEP1.gel-no Vit 2-1.tif:296: M-8	2118	10658	1.108	1.483	0.148	0.569	0	0.415
1641	116-UNSEP1.gel-no Vit 2-1.tif:297: M-9	1688	1617	0.883	0.225	-0.179	-2.152	NaN	-1.978
1642	116-UNSEP1.gel-no Vit 2-1.tif:298: M-10	2634	1758	1.378	0.245	0.463	-2.031	NaN	-2.499
1643	116-UNSEP1.gel-no Vit 2-1.tif:299: M-11	1743	1670	0.912	0.232	-0.133	-2.105	NaN	-1.977
1644	116-UNSEP1.gel-no Vit 2-1.tif:300: M-12	2148	12679	1.124	1.765	0.169	0.819	-0.193	0.646
1645	116-UNSEP1.gel-no Vit 2-1.tif:301: M-13	1930	8346	1.01	1.162	0.014	0.216	-0.29	0.197
1646	116-UNSEP1.gel-no Vit 2-1.tif:302: M-14	1692	1688	0.885	0.235	-0.176	-2.09	NaN	-1.919
1647	116-UNSEP1.gel-no Vit 2-1.tif:303: M-15	1686	1714	0.882	0.239	-0.181	-2.068	NaN	-1.892
1648	116-UNSEP1.gel-no Vit 2-1.tif:304: M-16	1925	1726	1.007	0.24	0.01	-2.058	NaN	-2.073
1649	116-UNSEP1.gel-no Vit 2-1.tif:305: M-17	1871	1740	0.979	0.242	-0.031	-2.046	NaN	-2.02
1650	116-UNSEP1.gel-no Vit 2-1.tif:306: M-18	1656	1765	0.866	0.246	-0.207	-2.025	NaN	-1.824
1651	116-UNSEP1.gel-no Vit 2-1.tif:307: M-19	1663	1779	0.87	0.248	-0.201	-2.014	NaN	-1.818
1652	116-UNSEP1.gel-no Vit 2-1.tif:308: M-20	2963	12360	1.55	1.72	0.633	0.783	0	0.145
1653	116-UNSEP1.gel-no Vit 2-1.tif:309: M-21	1630	1938	0.853	0.27	-0.23	-1.89	NaN	-1.666
1654	116-UNSEP1.gel-no Vit 2-1.tif:310: M-22	1694	1785	0.886	0.248	-0.174	-2.009	NaN	-1.84
1655	116-UNSEP1.gel-no Vit 2-1.tif:311: M-23	1643	3713	0.86	0.517	-0.218	-0.952	NaN	-0.739
1656	116-UNSEP1.gel-no Vit 2-1.tif:312: M-24	2025	1952	1.06	0.272	0.083	-1.88	NaN	-1.969
1657	116-UNSEP1.gel-no Vit 2-1.tif:313: N-1	2322	10831	1.215	1.507	0.281	0.592	0.212	0.306
1658	116-UNSEP1.gel-no Vit 2-1.tif:314: N-2	1779	1583	0.931	0.22	-0.103	-2.182	NaN	-2.084
1659	116-UNSEP1.gel-no Vit 2-1.tif:315: N-3	2221	10074	1.162	1.402	0.217	0.488	-0.115	0.266
1660	116-UNSEP1.gel-no Vit 2-1.tif:316: N-4	1712	1536	0.896	0.214	-0.159	-2.226	NaN	-2.072
1661	116-UNSEP1.gel-no Vit 2-1.tif:317: N-5	1701	1679	0.89	0.234	-0.168	-2.097	NaN	-1.935
1662	116-UNSEP1.gel-no Vit 2-1.tif:318: N-6	1836	1573	0.961	0.219	-0.058	-2.192	NaN	-2.139
1663	116-UNSEP1.gel-no Vit 2-1.tif:319: N-7	2226	11329	1.165	1.577	0.22	0.657	-0.263	0.432
1664	116-UNSEP1.gel-no Vit 2-1.tif:320: N-8	2558	11942	1.338	1.662	0.421	0.733	-0.152	0.307
1665	116-UNSEP1.gel-no Vit 2-1.tif:321: N-9	1674	1600	0.876	0.223	-0.191	-2.167	NaN	-1.981
1666	116-UNSEP1.gel-no Vit 2-1.tif:322: N-10	1753	1656	0.917	0.23	-0.125	-2.117	NaN	-1.998
1667	116-UNSEP1.gel-no Vit 2-1.tif:323: N-11	1775	1630	0.929	0.227	-0.107	-2.14	NaN	-2.039
1668	116-UNSEP1.gel-no Vit 2-1.tif:324: N-12	1729	1612	0.905	0.224	-0.145	-2.156	NaN	-2.017
1669	116-UNSEP1.gel-no Vit 2-1.tif:325: N-13	2368	11222	1.239	1.562	0.309	0.643	-0.107	0.329
1670	116-UNSEP1.gel-no Vit 2-1.tif:326: N-14	2408	13152	1.26	1.83	0.333	0.872	0	0.534
1671	116-UNSEP1.gel-no Vit 2-1.tif:327: N-15	1675	1674	0.876	0.233	-0.19	-2.102	NaN	-1.917
1672	116-UNSEP1.gel-no Vit 2-1.tif:328: N-16	1790	1687	0.937	0.235	-0.094	-2.091	NaN	-2.001
1673	116-UNSEP1.gel-no Vit 2-1.tif:329: N-17	1701	1759	0.89	0.245	-0.168	-2.03	NaN	-1.867
1674	116-UNSEP1.gel-no Vit 2-1.tif:330: N-18	2429	12764	1.271	1.776	0.346	0.829	-0.241	0.478
1675	116-UNSEP1.gel-no Vit 2-1.tif:331: N-19	1639	1751	0.858	0.244	-0.222	-2.037	NaN	-1.82
1676	116-UNSEP1.gel-no Vit 2-1.tif:332: N-20	1949	12168	1.02	1.693	0.028	0.76	0.17	0.727
1677	116-UNSEP1.gel-no Vit 2-1.tif:333: N-21	2203	11266	1.153	1.568	0.205	0.649	-0.3	0.439
1678	116-UNSEP1.gel-no Vit 2-1.tif:334: N-22	2024	9953	1.059	1.385	0.083	0.47	0.737	0.382
1679	116-UNSEP1.gel-no Vit 2-1.tif:335: N-23	2493	15577	1.304	2.168	0.383	1.116	-0.181	0.728
1680	116-UNSEP1.gel-no Vit 2-1.tif:336: N-24	1873	1898	0.98	0.264	-0.029	-1.921	NaN	-1.897
1681	118-UNSEP1.gel-no Vit 1.tif:1: A-1	2401	9774	1.312	1.567	0.392	0.648	0.3	0.252
1682	118-UNSEP1.gel-no Vit 1.tif:2: A-2	1816	7358	0.992	1.18	-0.011	0.239	0.771	0.246
1683	118-UNSEP1.gel-no Vit 1.tif:3: A-3	1968	1652	1.075	0.265	0.105	-1.916	NaN	-2.026
1684	118-UNSEP1.gel-no Vit 1.tif:4: A-4	1937	7469	1.058	1.198	0.082	0.26	0.893	0.174
1685	118-UNSEP1.gel-no Vit 1.tif:5: A-5	1830	3481	1	0.558	0	-0.841	1.341	-0.845
1686	118-UNSEP1.gel-no Vit 1.tif:6: A-6	2049	7461	1.12	1.196	0.163	0.259	0.322	0.091
1687	118-UNSEP1.gel-no Vit 1.tif:7: A-7	1929	10831	1.054	1.737	0.076	0.797	0.263	0.716
1688	118-UNSEP1.gel-no Vit 1.tif:8: A-8	1934	4381	1.057	0.703	0.08	-0.509	0.788	-0.593
1689	118-UNSEP1.gel-no Vit 1.tif:9: A-9	1885	9258	1.03	1.485	0.043	0.57	0.222	0.523
1690	118-UNSEP1.gel-no Vit 1.tif:10: A-10	1849	1770	1.01	0.284	0.015	-1.817	NaN	-1.836
1691	118-UNSEP1.gel-no Vit 1.tif:11: A-11	1853	1776	1.013	0.285	0.018	-1.812	NaN	-1.834
1692	118-UNSEP1.gel-no Vit 1.tif:12: A-12	2301	11225	1.257	1.8	0.33	0.848	0.138	0.513
1693	118-UNSEP1.gel-no Vit 1.tif:13: A-13	1895	1811	1.036	0.29	0.05	-1.784	NaN	-1.838
1694	118-UNSEP1.gel-no Vit 1.tif:14: A-14	2483	8652	1.357	1.387	0.44	0.472	0.115	0.028
1695	118-UNSEP1.gel-no Vit 1.tif:15: A-15	1934	7475	1.057	1.199	0.08	0.261	1.369	0.177
1696	118-UNSEP1.gel-no Vit 1.tif:16: A-16	1868	10565	1.021	1.694	0.03	0.761	-0.241	0.727
1697	118-UNSEP1.gel-no Vit 1.tif:17: A-17	2002	9323	1.094	1.495	0.13	0.58	0.115	0.446
1698	118-UNSEP1.gel-no Vit 1.tif:18: A-18	2045	10837	1.117	1.738	0.16	0.797	0.415	0.633
1699	118-UNSEP1.gel-no Vit 1.tif:19: A-19	1835	1964	1.003	0.315	0.004	-1.667	NaN	-1.675
1700	118-UNSEP1.gel-no Vit 1.tif:20: A-20	1887	1976	1.031	0.317	0.044	-1.658	NaN	-1.707
1701	118-UNSEP1.gel-no Vit 1.tif:21: A-21	2001	13867	1.093	2.224	0.129	1.153	0	1.02
1702	118-UNSEP1.gel-no Vit 1.tif:22: A-22	2266	14091	1.238	2.26	0.308	1.176	0.248	0.864
1703	118-UNSEP1.gel-no Vit 1.tif:23: A-23	2051	13128	1.121	2.105	0.164	1.074	-0.193	0.905
1704	118-UNSEP1.gel-no Vit 1.tif:24: A-24	2417	13650	1.321	2.189	0.401	1.13	-0.1	0.725
1705	118-UNSEP1.gel-no Vit 1.tif:25: B-1	2046	10136	1.118	1.625	0.161	0.701	0.263	0.536
1706	118-UNSEP1.gel-no Vit 1.tif:26: B-2	2151	9895	1.175	1.587	0.233	0.666	0.737	0.429
1707	118-UNSEP1.gel-no Vit 1.tif:27: B-3	1779	11118	0.972	1.783	-0.041	0.834	-0.138	0.871
1708	118-UNSEP1.gel-no Vit 1.tif:28: B-4	1619	1557	0.885	0.25	-0.177	-2.002	NaN	-1.829
1709	118-UNSEP1.gel-no Vit 1.tif:29: B-5	2007	10156	1.097	1.629	0.133	0.704	0.415	0.566
1710	118-UNSEP1.gel-no Vit 1.tif:30: B-6	2108	8190	1.152	1.313	0.204	0.393	-0.193	0.185
1711	118-UNSEP1.gel-no Vit 1.tif:31: B-7	1936	10153	1.058	1.628	0.081	0.703	0	0.618
1712	118-UNSEP1.gel-no Vit 1.tif:32: B-8	2894	11389	1.581	1.826	0.661	0.869	0.541	0.203
1713	118-UNSEP1.gel-no Vit 1.tif:33: B-9	2086	8937	1.14	1.433	0.189	0.519	0.759	0.326
1714	118-UNSEP1.gel-no Vit 1.tif:34: B-10	2351	11007	1.285	1.765	0.361	0.82	0.152	0.454
1715	118-UNSEP1.gel-no Vit 1.tif:35: B-11	2547	11058	1.392	1.773	0.477	0.826	0	0.345
1716	118-UNSEP1.gel-no Vit 1.tif:36: B-12	2102	11896	1.149	1.908	0.2	0.932	-0.138	0.728
1717	118-UNSEP1.gel-no Vit 1.tif:37: B-13	1784	2006	0.975	0.322	-0.037	-1.636	NaN	-1.604
1718	118-UNSEP1.gel-no Vit 1.tif:38: B-14	1620	1707	0.885	0.274	-0.176	-1.869	NaN	-1.698
1719	118-UNSEP1.gel-no Vit 1.tif:39: B-15	1843	8963	1.007	1.437	0.01	0.523	-0.29	0.509
1720	118-UNSEP1.gel-no Vit 1.tif:40: B-16	1900	5715	1.038	0.916	0.054	-0.126	NaN	-0.184
1721	118-UNSEP1.gel-no Vit 1.tif:41: B-17	1999	1955	1.092	0.314	0.127	-1.673	NaN	-1.805
1722	118-UNSEP1.gel-no Vit 1.tif:42: B-18	2030	13812	1.109	2.215	0.15	1.147	-0.241	0.993
1723	118-UNSEP1.gel-no Vit 1.tif:43: B-19	1654	1848	0.904	0.296	-0.146	-1.755	NaN	-1.613
1724	118-UNSEP1.gel-no Vit 1.tif:44: B-20	1677	1786	0.916	0.286	-0.126	-1.804	NaN	-1.682
1725	118-UNSEP1.gel-no Vit 1.tif:45: B-21	2242	13430	1.225	2.154	0.293	1.107	-0.29	0.81
1726	118-UNSEP1.gel-no Vit 1.tif:46: B-22	3248	12642	1.775	2.027	0.828	1.02	0.263	0.188
1727	118-UNSEP1.gel-no Vit 1.tif:47: B-23	3904	1857	2.133	0.298	1.093	-1.748	NaN	-2.845
1728	118-UNSEP1.gel-no Vit 1.tif:48: B-24	8931	9672	4.88	1.551	2.287	0.633	0.585	-1.658
1729	118-UNSEP1.gel-no Vit 1.tif:49: C-1	1722	9121	0.941	1.463	-0.088	0.549	0.263	0.632
1730	118-UNSEP1.gel-no Vit 1.tif:50: C-2	1565	2685	0.855	0.431	-0.226	-1.216	NaN	-0.994
1731	118-UNSEP1.gel-no Vit 1.tif:51: C-3	1576	2028	0.861	0.325	-0.216	-1.621	NaN	-1.409
1732	118-UNSEP1.gel-no Vit 1.tif:52: C-4	1590	1533	0.869	0.246	-0.203	-2.024	NaN	-1.826
1733	118-UNSEP1.gel-no Vit 1.tif:53: C-5	1793	9380	0.98	1.504	-0.029	0.589	0	0.614
1734	118-UNSEP1.gel-no Vit 1.tif:54: C-6	1991	11614	1.088	1.862	0.122	0.897	-0.193	0.771
1735	118-UNSEP1.gel-no Vit 1.tif:55: C-7	1660	2105	0.907	0.338	-0.141	-1.567	NaN	-1.43
1736	118-UNSEP1.gel-no Vit 1.tif:56: C-8	2006	1612	1.096	0.259	0.132	-1.952	NaN	-2.089
1737	118-UNSEP1.gel-no Vit 1.tif:57: C-9	1706	1688	0.932	0.271	-0.101	-1.885	NaN	-1.788
1738	118-UNSEP1.gel-no Vit 1.tif:58: C-10	1661	1625	0.908	0.261	-0.14	-1.94	NaN	-1.805
1739	118-UNSEP1.gel-no Vit 1.tif:59: C-11	2097	1709	1.146	0.274	0.196	-1.867	NaN	-2.068
1740	118-UNSEP1.gel-no Vit 1.tif:60: C-12	1818	1659	0.993	0.266	-0.009	-1.91	NaN	-1.905
1741	118-UNSEP1.gel-no Vit 1.tif:61: C-13	1845	9274	1.008	1.487	0.012	0.573	0.206	0.557
1742	118-UNSEP1.gel-no Vit 1.tif:62: C-14	1956	9829	1.069	1.576	0.096	0.656	-0.17	0.556
1743	118-UNSEP1.gel-no Vit 1.tif:63: C-15	1683	2240	0.92	0.359	-0.121	-1.477	NaN	-1.361
1744	118-UNSEP1.gel-no Vit 1.tif:64: C-16	1618	1807	0.884	0.29	-0.178	-1.787	NaN	-1.614
1745	118-UNSEP1.gel-no Vit 1.tif:65: C-17	2868	1745	1.567	0.28	0.648	-1.837	NaN	-2.49
1746	118-UNSEP1.gel-no Vit 1.tif:66: C-18	1715	1838	0.937	0.295	-0.094	-1.762	NaN	-1.673
1747	118-UNSEP1.gel-no Vit 1.tif:67: C-19	1935	12044	1.057	1.931	0.08	0.95	-0.126	0.865
1748	118-UNSEP1.gel-no Vit 1.tif:68: C-20	1619	1856	0.885	0.298	-0.177	-1.748	NaN	-1.576
1749	118-UNSEP1.gel-no Vit 1.tif:69: C-21	1617	1910	0.884	0.306	-0.179	-1.707	NaN	-1.533
1750	118-UNSEP1.gel-no Vit 1.tif:70: C-22	1593	1986	0.87	0.318	-0.2	-1.651	NaN	-1.455
1751	118-UNSEP1.gel-no Vit 1.tif:71: C-23	2006	13939	1.096	2.235	0.132	1.16	-0.107	1.024
1752	118-UNSEP1.gel-no Vit 1.tif:72: C-24	2495	10744	1.363	1.723	0.447	0.785	0.263	0.333
1753	118-UNSEP1.gel-no Vit 1.tif:73: D-1	2163	8297	1.182	1.331	0.241	0.412	0.907	0.167
1754	118-UNSEP1.gel-no Vit 1.tif:74: D-2	1571	1636	0.858	0.262	-0.22	-1.93	NaN	-1.715
1755	118-UNSEP1.gel-no Vit 1.tif:75: D-3	2219	6751	1.213	1.083	0.278	0.115	0.9	-0.168
1756	118-UNSEP1.gel-no Vit 1.tif:76: D-4	1631	1593	0.891	0.255	-0.166	-1.969	NaN	-1.807
1757	118-UNSEP1.gel-no Vit 1.tif:77: D-5	1958	7314	1.07	1.173	0.098	0.23	0	0.128
1758	118-UNSEP1.gel-no Vit 1.tif:78: D-6	1657	2166	0.905	0.347	-0.143	-1.526	NaN	-1.387
1759	118-UNSEP1.gel-no Vit 1.tif:79: D-7	2607	11208	1.425	1.797	0.511	0.846	0.29	0.331
1760	118-UNSEP1.gel-no Vit 1.tif:80: D-8	1887	1639	1.031	0.263	0.044	-1.928	NaN	-1.976
1761	118-UNSEP1.gel-no Vit 1.tif:81: D-9	1836	6328	1.003	1.015	0.005	0.021	0.193	0.012
1762	118-UNSEP1.gel-no Vit 1.tif:82: D-10	2090	8231	1.142	1.32	0.192	0.4	0.138	0.205
1763	118-UNSEP1.gel-no Vit 1.tif:83: D-11	2018	1675	1.103	0.269	0.141	-1.896	NaN	-2.042
1764	118-UNSEP1.gel-no Vit 1.tif:84: D-12	2176	11844	1.189	1.899	0.25	0.926	-0.138	0.671
1765	118-UNSEP1.gel-no Vit 1.tif:85: D-13	1665	1673	0.91	0.268	-0.136	-1.898	NaN	-1.766
1766	118-UNSEP1.gel-no Vit 1.tif:86: D-14	1759	5859	0.961	0.94	-0.057	-0.09	0.392	-0.037
1767	118-UNSEP1.gel-no Vit 1.tif:87: D-15	1749	5777	0.956	0.926	-0.065	-0.11	0.823	-0.049
1768	118-UNSEP1.gel-no Vit 1.tif:88: D-16	1722	1696	0.941	0.272	-0.088	-1.878	NaN	-1.795
1769	118-UNSEP1.gel-no Vit 1.tif:89: D-17	1847	11644	1.009	1.867	0.013	0.901	0.1	0.883
1770	118-UNSEP1.gel-no Vit 1.tif:90: D-18	2148	7305	1.174	1.171	0.231	0.228	0.17	-0.007
1771	118-UNSEP1.gel-no Vit 1.tif:91: D-19	2107	11495	1.151	1.843	0.203	0.882	-0.322	0.675
1772	118-UNSEP1.gel-no Vit 1.tif:92: D-20	1631	1785	0.891	0.286	-0.166	-1.805	NaN	-1.643
1773	118-UNSEP1.gel-no Vit 1.tif:93: D-21	1610	2503	0.88	0.401	-0.185	-1.317	NaN	-1.136
1774	118-UNSEP1.gel-no Vit 1.tif:94: D-22	1924	4119	1.051	0.661	0.072	-0.598	1.817	-0.675
1775	118-UNSEP1.gel-no Vit 1.tif:95: D-23	2165	7420	1.183	1.19	0.243	0.251	0.193	0.004
1776	118-UNSEP1.gel-no Vit 1.tif:96: D-24	1679	1882	0.917	0.302	-0.124	-1.728	NaN	-1.608
1777	118-UNSEP1.gel-no Vit 1.tif:97: E-1	1702	2980	0.93	0.478	-0.105	-1.065	NaN	-0.965
1778	118-UNSEP1.gel-no Vit 1.tif:98: E-2	1601	1509	0.875	0.242	-0.193	-2.047	NaN	-1.858
1779	118-UNSEP1.gel-no Vit 1.tif:99: E-3	2068	10811	1.13	1.734	0.176	0.794	-0.29	0.613
1780	118-UNSEP1.gel-no Vit 1.tif:100: E-4	2177	11794	1.19	1.891	0.25	0.919	0.126	0.665
1781	118-UNSEP1.gel-no Vit 1.tif:101: E-5	1971	1631	1.077	0.262	0.107	-1.935	NaN	-2.046
1782	118-UNSEP1.gel-no Vit 1.tif:102: E-6	1872	10269	1.023	1.647	0.033	0.72	0.263	0.683
1783	118-UNSEP1.gel-no Vit 1.tif:103: E-7	1661	1625	0.908	0.261	-0.14	-1.94	NaN	-1.805
1784	118-UNSEP1.gel-no Vit 1.tif:104: E-8	1687	1591	0.922	0.255	-0.117	-1.971	NaN	-1.858
1785	118-UNSEP1.gel-no Vit 1.tif:105: E-9	1976	10049	1.08	1.611	0.111	0.688	0.138	0.573
1786	118-UNSEP1.gel-no Vit 1.tif:106: E-10	1874	8009	1.024	1.284	0.034	0.361	0.447	0.322
1787	118-UNSEP1.gel-no Vit 1.tif:107: E-11	1938	10303	1.059	1.652	0.083	0.724	0.263	0.637
1788	118-UNSEP1.gel-no Vit 1.tif:108: E-12	1957	9450	1.069	1.515	0.097	0.6	1	0.499
1789	118-UNSEP1.gel-no Vit 1.tif:109: E-13	2480	12060	1.355	1.934	0.438	0.952	-0.222	0.509
1790	118-UNSEP1.gel-no Vit 1.tif:110: E-14	1651	3097	0.902	0.497	-0.149	-1.01	NaN	-0.866
1791	118-UNSEP1.gel-no Vit 1.tif:111: E-15	2203	8965	1.204	1.438	0.268	0.524	-0.193	0.252
1792	118-UNSEP1.gel-no Vit 1.tif:112: E-16	1910	6468	1.044	1.037	0.062	0.053	1.348	-0.013
1793	118-UNSEP1.gel-no Vit 1.tif:113: E-17	2043	8749	1.116	1.403	0.159	0.489	0.737	0.325
1794	118-UNSEP1.gel-no Vit 1.tif:114: E-18	2028	10589	1.108	1.698	0.148	0.764	-0.263	0.611
1795	118-UNSEP1.gel-no Vit 1.tif:115: E-19	1943	10010	1.062	1.605	0.086	0.683	-0.415	0.592
1796	118-UNSEP1.gel-no Vit 1.tif:116: E-20	3224	11724	1.762	1.88	0.817	0.911	0.415	0.09
1797	118-UNSEP1.gel-no Vit 1.tif:117: E-21	1668	8181	0.911	1.312	-0.134	0.392	0.263	0.521
1798	118-UNSEP1.gel-no Vit 1.tif:118: E-22	1993	13057	1.089	2.094	0.123	1.066	-0.115	0.939
1799	118-UNSEP1.gel-no Vit 1.tif:119: E-23	2258	11677	1.234	1.873	0.303	0.905	0.553	0.598
1800	118-UNSEP1.gel-no Vit 1.tif:120: E-24	2318	11458	1.267	1.837	0.341	0.878	-0.115	0.532
1801	118-UNSEP1.gel-no Vit 1.tif:121: F-1	1797	7759	0.982	1.244	-0.026	0.315	0.263	0.337
1802	118-UNSEP1.gel-no Vit 1.tif:122: F-2	2098	11482	1.146	1.841	0.197	0.881	0.152	0.679
1803	118-UNSEP1.gel-no Vit 1.tif:123: F-3	1768	6739	0.966	1.081	-0.05	0.112	-0.322	0.157
1804	118-UNSEP1.gel-no Vit 1.tif:124: F-4	1785	5422	0.975	0.869	-0.036	-0.202	1.206	-0.17
1805	118-UNSEP1.gel-no Vit 1.tif:125: F-5	1933	1772	1.056	0.284	0.079	-1.815	1.773	-1.898
1806	118-UNSEP1.gel-no Vit 1.tif:126: F-6	1968	8323	1.075	1.335	0.105	0.417	0.515	0.307
1807	118-UNSEP1.gel-no Vit 1.tif:127: F-7	2179	9467	1.191	1.518	0.252	0.602	-0.222	0.346
1808	118-UNSEP1.gel-no Vit 1.tif:128: F-8	1936	1591	1.058	0.255	0.081	-1.971	NaN	-2.056
1809	118-UNSEP1.gel-no Vit 1.tif:129: F-9	1605	1644	0.877	0.264	-0.189	-1.923	NaN	-1.738
1810	118-UNSEP1.gel-no Vit 1.tif:130: F-10	1878	5619	1.026	0.901	0.037	-0.15	0	-0.192
1811	118-UNSEP1.gel-no Vit 1.tif:131: F-11	1965	7080	1.074	1.135	0.103	0.183	0.263	0.076
1812	118-UNSEP1.gel-no Vit 1.tif:132: F-12	1667	1625	0.911	0.261	-0.135	-1.94	NaN	-1.81
1813	118-UNSEP1.gel-no Vit 1.tif:133: F-13	2461	10396	1.345	1.667	0.427	0.737	-0.485	0.306
1814	118-UNSEP1.gel-no Vit 1.tif:134: F-14	1852	1771	1.012	0.284	0.017	-1.816	NaN	-1.838
1815	118-UNSEP1.gel-no Vit 1.tif:135: F-15	1974	8413	1.079	1.349	0.109	0.432	0	0.318
1816	118-UNSEP1.gel-no Vit 1.tif:136: F-16	2233	2306	1.22	0.37	0.287	-1.435	NaN	-1.727
1817	118-UNSEP1.gel-no Vit 1.tif:137: F-17	1766	1708	0.965	0.274	-0.051	-1.868	NaN	-1.821
1818	118-UNSEP1.gel-no Vit 1.tif:138: F-18	1790	8394	0.978	1.346	-0.032	0.429	0.363	0.456
1819	118-UNSEP1.gel-no Vit 1.tif:139: F-19	1849	5738	1.01	0.92	0.015	-0.12	-0.363	-0.139
1820	118-UNSEP1.gel-no Vit 1.tif:140: F-20	1800	7246	0.984	1.162	-0.024	0.217	0.322	0.236
1821	118-UNSEP1.gel-no Vit 1.tif:141: F-21	2133	11257	1.166	1.805	0.221	0.852	1.888	0.627
1822	118-UNSEP1.gel-no Vit 1.tif:142: F-22	1881	12121	1.028	1.944	0.04	0.959	0.115	0.915
1823	118-UNSEP1.gel-no Vit 1.tif:143: F-23	1805	1808	0.986	0.29	-0.02	-1.786	NaN	-1.771
1824	118-UNSEP1.gel-no Vit 1.tif:144: F-24	1762	1876	0.963	0.301	-0.055	-1.733	NaN	-1.683
1825	118-UNSEP1.gel-no Vit 1.tif:145: G-1	2101	7832	1.148	1.256	0.199	0.329	0.29	0.125
1826	118-UNSEP1.gel-no Vit 1.tif:146: G-2	2506	9522	1.369	1.527	0.454	0.611	0.379	0.153
1827	118-UNSEP1.gel-no Vit 1.tif:147: G-3	2007	11425	1.097	1.832	0.133	0.874	0	0.736
1828	118-UNSEP1.gel-no Vit 1.tif:148: G-4	2120	7434	1.158	1.192	0.212	0.254	0.585	0.037
1829	118-UNSEP1.gel-no Vit 1.tif:149: G-5	2448	2758	1.338	0.442	0.42	-1.177	1.61	-1.601
1830	118-UNSEP1.gel-no Vit 1.tif:150: G-6	2036	8855	1.113	1.42	0.154	0.506	1.07	0.348
1831	118-UNSEP1.gel-no Vit 1.tif:151: G-7	1807	7281	0.987	1.168	-0.018	0.224	-0.193	0.238
1832	118-UNSEP1.gel-no Vit 1.tif:152: G-8	1909	7803	1.043	1.251	0.061	0.323	-0.222	0.258
1833	118-UNSEP1.gel-no Vit 1.tif:153: G-9	1755	5902	0.959	0.946	-0.06	-0.079	-0.17	-0.023
1834	118-UNSEP1.gel-no Vit 1.tif:154: G-10	1684	1594	0.92	0.256	-0.12	-1.968	NaN	-1.852
1835	118-UNSEP1.gel-no Vit 1.tif:155: G-11	2693	9848	1.472	1.579	0.557	0.659	0.459	0.098
1836	118-UNSEP1.gel-no Vit 1.tif:156: G-12	2073	2039	1.133	0.327	0.18	-1.613	NaN	-1.797
1837	118-UNSEP1.gel-no Vit 1.tif:157: G-13	1981	10783	1.083	1.729	0.114	0.79	0	0.671
1838	118-UNSEP1.gel-no Vit 1.tif:158: G-14	1972	8942	1.078	1.434	0.108	0.52	0.531	0.408
1839	118-UNSEP1.gel-no Vit 1.tif:159: G-15	1780	7389	0.973	1.185	-0.04	0.245	0	0.28
1840	118-UNSEP1.gel-no Vit 1.tif:160: G-16	1736	6920	0.949	1.11	-0.076	0.15	0.794	0.222
1841	118-UNSEP1.gel-no Vit 1.tif:161: G-17	1882	8636	1.028	1.385	0.04	0.47	-0.17	0.425
1842	118-UNSEP1.gel-no Vit 1.tif:162: G-18	1721	2047	0.94	0.328	-0.089	-1.607	NaN	-1.523
1843	118-UNSEP1.gel-no Vit 1.tif:163: G-19	1682	1729	0.919	0.277	-0.122	-1.851	NaN	-1.733
1844	118-UNSEP1.gel-no Vit 1.tif:164: G-20	1613	1811	0.881	0.29	-0.182	-1.784	NaN	-1.606
1845	118-UNSEP1.gel-no Vit 1.tif:165: G-21	2111	10871	1.154	1.743	0.206	0.802	0.503	0.591
1846	118-UNSEP1.gel-no Vit 1.tif:166: G-22	1846	8655	1.009	1.388	0.013	0.473	0	0.456
1847	118-UNSEP1.gel-no Vit 1.tif:167: G-23	2325	2058	1.27	0.33	0.345	-1.599	NaN	-1.949
1848	118-UNSEP1.gel-no Vit 1.tif:168: G-24	2053	10382	1.122	1.665	0.166	0.735	1.533	0.565
1849	118-UNSEP1.gel-no Vit 1.tif:169: H-1	1915	6609	1.046	1.06	0.066	0.084	1.692	0.014
1850	118-UNSEP1.gel-no Vit 1.tif:170: H-2	1951	7048	1.066	1.13	0.092	0.177	0.415	0.08
1851	118-UNSEP1.gel-no Vit 1.tif:171: H-3	1794	10190	0.98	1.634	-0.029	0.708	0.138	0.733
1852	118-UNSEP1.gel-no Vit 1.tif:172: H-4	1883	8742	1.029	1.402	0.041	0.487	-0.193	0.442
1853	118-UNSEP1.gel-no Vit 1.tif:173: H-5	1882	8841	1.028	1.418	0.04	0.504	0.379	0.459
1854	118-UNSEP1.gel-no Vit 1.tif:174: H-6	1715	1648	0.937	0.264	-0.094	-1.92	NaN	-1.831
1855	118-UNSEP1.gel-no Vit 1.tif:175: H-7	1611	1554	0.88	0.249	-0.184	-2.005	NaN	-1.825
1856	118-UNSEP1.gel-no Vit 1.tif:176: H-8	1713	1760	0.936	0.282	-0.095	-1.825	NaN	-1.734
1857	118-UNSEP1.gel-no Vit 1.tif:177: H-9	1988	1617	1.086	0.259	0.119	-1.947	NaN	-2.071
1858	118-UNSEP1.gel-no Vit 1.tif:178: H-10	1741	7004	0.951	1.123	-0.072	0.168	-0.193	0.235
1859	118-UNSEP1.gel-no Vit 1.tif:179: H-11	2123	1884	1.16	0.302	0.214	-1.727	NaN	-1.945
1860	118-UNSEP1.gel-no Vit 1.tif:180: H-12	1697	1928	0.927	0.309	-0.109	-1.693	NaN	-1.589
1861	118-UNSEP1.gel-no Vit 1.tif:181: H-13	1759	1638	0.961	0.263	-0.057	-1.929	NaN	-1.876
1862	118-UNSEP1.gel-no Vit 1.tif:182: H-14	1725	1816	0.943	0.291	-0.085	-1.78	NaN	-1.699
1863	118-UNSEP1.gel-no Vit 1.tif:183: H-15	1628	1662	0.89	0.267	-0.169	-1.908	NaN	-1.743
1864	118-UNSEP1.gel-no Vit 1.tif:184: H-16	1856	11206	1.014	1.797	0.02	0.846	0	0.821
1865	118-UNSEP1.gel-no Vit 1.tif:185: H-17	1744	1753	0.953	0.281	-0.069	-1.831	NaN	-1.766
1866	118-UNSEP1.gel-no Vit 1.tif:186: H-18	1636	1731	0.894	0.278	-0.162	-1.849	NaN	-1.692
1867	118-UNSEP1.gel-no Vit 1.tif:187: H-19	2225	10606	1.216	1.701	0.282	0.766	-0.193	0.48
1868	118-UNSEP1.gel-no Vit 1.tif:188: H-20	1853	7977	1.013	1.279	0.018	0.355	0.585	0.333
1869	118-UNSEP1.gel-no Vit 1.tif:189: H-21	1973	11237	1.078	1.802	0.109	0.85	-0.138	0.737
1870	118-UNSEP1.gel-no Vit 1.tif:190: H-22	1886	9210	1.031	1.477	0.043	0.563	0.263	0.515
1871	118-UNSEP1.gel-no Vit 1.tif:191: H-23	1930	1880	1.055	0.301	0.077	-1.73	NaN	-1.811
1872	118-UNSEP1.gel-no Vit 1.tif:192: H-24	2090	9662	1.142	1.549	0.192	0.632	0	0.436
1873	118-UNSEP1.gel-no Vit 1.tif:193: I-1	2357	10881	1.288	1.745	0.365	0.803	-0.363	0.434
1874	118-UNSEP1.gel-no Vit 1.tif:194: I-2	2177	8937	1.19	1.433	0.25	0.519	1.078	0.264
1875	118-UNSEP1.gel-no Vit 1.tif:195: I-3	1574	1710	0.86	0.274	-0.217	-1.867	NaN	-1.653
1876	118-UNSEP1.gel-no Vit 1.tif:196: I-4	2032	1527	1.11	0.245	0.151	-2.03	NaN	-2.185
1877	118-UNSEP1.gel-no Vit 1.tif:197: I-5	1609	1544	0.879	0.248	-0.186	-2.014	NaN	-1.833
1878	118-UNSEP1.gel-no Vit 1.tif:198: I-6	1607	1564	0.878	0.251	-0.187	-1.995	NaN	-1.812
1879	118-UNSEP1.gel-no Vit 1.tif:199: I-7	1847	7436	1.009	1.192	0.013	0.254	0.459	0.236
1880	118-UNSEP1.gel-no Vit 1.tif:200: I-8	1601	1554	0.875	0.249	-0.193	-2.005	NaN	-1.816
1881	118-UNSEP1.gel-no Vit 1.tif:201: I-9	1627	1595	0.889	0.256	-0.17	-1.967	NaN	-1.802
1882	118-UNSEP1.gel-no Vit 1.tif:202: I-10	1861	1703	1.017	0.273	0.024	-1.873	NaN	-1.901
1883	118-UNSEP1.gel-no Vit 1.tif:203: I-11	1605	1584	0.877	0.254	-0.189	-1.977	NaN	-1.792
1884	118-UNSEP1.gel-no Vit 1.tif:204: I-12	1751	5074	0.957	0.814	-0.064	-0.297	0.222	-0.238
1885	118-UNSEP1.gel-no Vit 1.tif:205: I-13	2477	10304	1.354	1.652	0.437	0.725	0.485	0.284
1886	118-UNSEP1.gel-no Vit 1.tif:206: I-14	2139	11691	1.169	1.875	0.225	0.907	0.17	0.677
1887	118-UNSEP1.gel-no Vit 1.tif:207: I-15	1609	1958	0.879	0.314	-0.186	-1.671	NaN	-1.49
1888	118-UNSEP1.gel-no Vit 1.tif:208: I-16	1859	6013	1.016	0.964	0.023	-0.052	-0.585	-0.079
1889	118-UNSEP1.gel-no Vit 1.tif:209: I-17	1810	9563	0.989	1.534	-0.016	0.617	-0.363	0.628
1890	118-UNSEP1.gel-no Vit 1.tif:210: I-18	1831	9230	1.001	1.48	0.0007881	0.566	-0.322	0.561
1891	118-UNSEP1.gel-no Vit 1.tif:211: I-19	1770	8012	0.967	1.285	-0.048	0.362	0	0.405
1892	118-UNSEP1.gel-no Vit 1.tif:212: I-20	1629	1783	0.89	0.286	-0.168	-1.806	NaN	-1.643
1893	118-UNSEP1.gel-no Vit 1.tif:213: I-21	2079	11785	1.136	1.89	0.184	0.918	0.115	0.73
1894	118-UNSEP1.gel-no Vit 1.tif:214: I-22	2092	10110	1.143	1.621	0.193	0.697	-0.585	0.5
1895	118-UNSEP1.gel-no Vit 1.tif:215: I-23	1893	1799	1.034	0.288	0.049	-1.793	NaN	-1.847
1896	118-UNSEP1.gel-no Vit 1.tif:216: I-24	1878	1928	1.026	0.309	0.037	-1.693	NaN	-1.735
1897	118-UNSEP1.gel-no Vit 1.tif:217: J-1	1701	7733	0.93	1.24	-0.105	0.31	1.624	0.412
1898	118-UNSEP1.gel-no Vit 1.tif:218: J-2	1575	1480	0.861	0.237	-0.216	-2.075	NaN	-1.863
1899	118-UNSEP1.gel-no Vit 1.tif:219: J-3	2210	1611	1.208	0.258	0.272	-1.953	NaN	-2.229
1900	118-UNSEP1.gel-no Vit 1.tif:220: J-4	1962	8316	1.072	1.334	0.1	0.415	0.621	0.311
1901	118-UNSEP1.gel-no Vit 1.tif:221: J-5	1728	1598	0.944	0.256	-0.083	-1.964	NaN	-1.886
1902	118-UNSEP1.gel-no Vit 1.tif:222: J-6	2017	10610	1.102	1.701	0.14	0.767	0.348	0.622
1903	118-UNSEP1.gel-no Vit 1.tif:223: J-7	1607	1555	0.878	0.249	-0.187	-2.004	NaN	-1.82
1904	118-UNSEP1.gel-no Vit 1.tif:224: J-8	1745	1581	0.954	0.254	-0.069	-1.98	NaN	-1.915
1905	118-UNSEP1.gel-no Vit 1.tif:225: J-9	1620	1645	0.885	0.264	-0.176	-1.922	NaN	-1.751
1906	118-UNSEP1.gel-no Vit 1.tif:226: J-10	2309	9355	1.262	1.5	0.335	0.585	-0.222	0.245
1907	118-UNSEP1.gel-no Vit 1.tif:227: J-11	1719	5232	0.939	0.839	-0.09	-0.253	0.766	-0.167
1908	118-UNSEP1.gel-no Vit 1.tif:228: J-12	2093	6479	1.144	1.039	0.194	0.055	-0.263	-0.143
1909	118-UNSEP1.gel-no Vit 1.tif:229: J-13	2339	1641	1.278	0.263	0.354	-1.926	NaN	-2.284
1910	118-UNSEP1.gel-no Vit 1.tif:230: J-14	2660	9686	1.454	1.553	0.54	0.635	0.628	0.091
1911	118-UNSEP1.gel-no Vit 1.tif:231: J-15	2288	1738	1.25	0.279	0.322	-1.843	NaN	-2.17
1912	118-UNSEP1.gel-no Vit 1.tif:232: J-16	2000	8431	1.093	1.352	0.128	0.435	-0.193	0.303
1913	118-UNSEP1.gel-no Vit 1.tif:233: J-17	1928	7378	1.054	1.183	0.075	0.243	-0.222	0.163
1914	118-UNSEP1.gel-no Vit 1.tif:234: J-18	1955	9813	1.068	1.574	0.095	0.654	0.637	0.554
1915	118-UNSEP1.gel-no Vit 1.tif:235: J-19	2219	1759	1.213	0.282	0.278	-1.826	NaN	-2.108
1916	118-UNSEP1.gel-no Vit 1.tif:236: J-20	1803	8570	0.985	1.374	-0.021	0.459	-0.152	0.476
1917	118-UNSEP1.gel-no Vit 1.tif:237: J-21	19586	1753	10.703	0.281	3.42	-1.831	NaN	-5.255
1918	118-UNSEP1.gel-no Vit 1.tif:238: J-22	1977	6627	1.08	1.063	0.111	0.088	1.054	-0.028
1919	118-UNSEP1.gel-no Vit 1.tif:239: J-23	2364	12443	1.292	1.995	0.369	0.997	-0.29	0.623
1920	118-UNSEP1.gel-no Vit 1.tif:240: J-24	2183	12924	1.193	2.073	0.254	1.051	-0.263	0.793
1921	118-UNSEP1.gel-no Vit 1.tif:241: K-1	1879	10584	1.027	1.697	0.038	0.763	-0.152	0.721
1922	118-UNSEP1.gel-no Vit 1.tif:242: K-2	2011	6886	1.099	1.104	0.136	0.143	1.7	0.003
1923	118-UNSEP1.gel-no Vit 1.tif:243: K-3	1946	6855	1.063	1.099	0.089	0.137	0.222	0.044
1924	118-UNSEP1.gel-no Vit 1.tif:244: K-4	2444	10580	1.336	1.697	0.417	0.763	0.541	0.341
1925	118-UNSEP1.gel-no Vit 1.tif:245: K-5	1861	7701	1.017	1.235	0.024	0.304	0.585	0.276
1926	118-UNSEP1.gel-no Vit 1.tif:246: K-6	2509	11380	1.371	1.825	0.455	0.868	0.29	0.408
1927	118-UNSEP1.gel-no Vit 1.tif:247: K-7	1582	1638	0.864	0.263	-0.21	-1.929	NaN	-1.723
1928	118-UNSEP1.gel-no Vit 1.tif:248: K-8	2001	1578	1.093	0.253	0.129	-1.982	NaN	-2.116
1929	118-UNSEP1.gel-no Vit 1.tif:249: K-9	1993	9008	1.089	1.445	0.123	0.531	-0.193	0.403
1930	118-UNSEP1.gel-no Vit 1.tif:250: K-10	1649	1603	0.901	0.257	-0.15	-1.96	NaN	-1.814
1931	118-UNSEP1.gel-no Vit 1.tif:251: K-11	1965	7075	1.074	1.135	0.103	0.182	-0.17	0.075
1932	118-UNSEP1.gel-no Vit 1.tif:252: K-12	2322	1643	1.269	0.263	0.344	-1.924	NaN	-2.272
1933	118-UNSEP1.gel-no Vit 1.tif:253: K-13	1817	8530	0.993	1.368	-0.01	0.452	0.17	0.458
1934	118-UNSEP1.gel-no Vit 1.tif:254: K-14	2096	13278	1.145	2.129	0.196	1.09	-0.322	0.89
1935	118-UNSEP1.gel-no Vit 1.tif:255: K-15	1833	6244	1.002	1.001	0.002	0.002	1.663	-0.005
1936	118-UNSEP1.gel-no Vit 1.tif:256: K-16	2337	8357	1.277	1.34	0.353	0.422	-0.415	0.065
1937	118-UNSEP1.gel-no Vit 1.tif:257: K-17	2167	10152	1.184	1.628	0.244	0.703	-0.193	0.455
1938	118-UNSEP1.gel-no Vit 1.tif:258: K-18	2370	7723	1.295	1.238	0.373	0.309	-0.415	-0.069
1939	118-UNSEP1.gel-no Vit 1.tif:259: K-19	1933	8882	1.056	1.424	0.079	0.51	0	0.427
1940	118-UNSEP1.gel-no Vit 1.tif:260: K-20	2054	7935	1.122	1.272	0.167	0.348	-0.193	0.177
1941	118-UNSEP1.gel-no Vit 1.tif:261: K-21	1838	1781	1.004	0.286	0.006	-1.808	NaN	-1.818
1942	118-UNSEP1.gel-no Vit 1.tif:262: K-22	2085	10807	1.139	1.733	0.188	0.793	-0.515	0.601
1943	118-UNSEP1.gel-no Vit 1.tif:263: K-23	1720	5420	0.94	0.869	-0.089	-0.202	1.755	-0.117
1944	118-UNSEP1.gel-no Vit 1.tif:264: K-24	1640	2133	0.896	0.342	-0.158	-1.548	NaN	-1.394
1945	118-UNSEP1.gel-no Vit 1.tif:265: L-1	1682	1576	0.919	0.253	-0.122	-1.984	NaN	-1.867
1946	118-UNSEP1.gel-no Vit 1.tif:266: L-2	1852	9964	1.012	1.598	0.017	0.676	-0.152	0.655
1947	118-UNSEP1.gel-no Vit 1.tif:267: L-3	1950	7657	1.066	1.228	0.092	0.296	0.322	0.2
1948	118-UNSEP1.gel-no Vit 1.tif:268: L-4	2011	10448	1.099	1.675	0.136	0.745	0	0.604
1949	118-UNSEP1.gel-no Vit 1.tif:269: L-5	1903	6402	1.04	1.027	0.056	0.038	0	-0.023
1950	118-UNSEP1.gel-no Vit 1.tif:270: L-6	1663	1538	0.909	0.247	-0.138	-2.02	NaN	-1.886
1951	118-UNSEP1.gel-no Vit 1.tif:271: L-7	2152	7269	1.176	1.166	0.234	0.221	0	-0.017
1952	118-UNSEP1.gel-no Vit 1.tif:272: L-8	2155	9288	1.178	1.489	0.236	0.575	0	0.335
1953	118-UNSEP1.gel-no Vit 1.tif:273: L-9	1688	4497	0.922	0.721	-0.117	-0.472	0	-0.359
1954	118-UNSEP1.gel-no Vit 1.tif:274: L-10	1943	8999	1.062	1.443	0.086	0.529	0.788	0.438
1955	118-UNSEP1.gel-no Vit 1.tif:275: L-11	2398	7480	1.31	1.2	0.39	0.262	-0.263	-0.132
1956	118-UNSEP1.gel-no Vit 1.tif:276: L-12	1602	1611	0.875	0.258	-0.192	-1.953	NaN	-1.765
1957	118-UNSEP1.gel-no Vit 1.tif:277: L-13	1585	1641	0.866	0.263	-0.207	-1.926	NaN	-1.723
1958	118-UNSEP1.gel-no Vit 1.tif:278: L-14	1585	1692	0.866	0.271	-0.207	-1.882	NaN	-1.679
1959	118-UNSEP1.gel-no Vit 1.tif:279: L-15	1900	7714	1.038	1.237	0.054	0.307	1.766	0.248
1960	118-UNSEP1.gel-no Vit 1.tif:280: L-16	1626	1701	0.889	0.273	-0.171	-1.874	NaN	-1.708
1961	118-UNSEP1.gel-no Vit 1.tif:281: L-17	1762	6329	0.963	1.015	-0.055	0.021	1.152	0.072
1962	118-UNSEP1.gel-no Vit 1.tif:282: L-18	2242	9679	1.225	1.552	0.293	0.634	-0.193	0.337
1963	118-UNSEP1.gel-no Vit 1.tif:283: L-19	1641	5592	0.897	0.897	-0.157	-0.157	0.737	-0.004
1964	118-UNSEP1.gel-no Vit 1.tif:284: L-20	2179	11192	1.191	1.795	0.252	0.844	-0.138	0.588
1965	118-UNSEP1.gel-no Vit 1.tif:285: L-21	1666	1737	0.91	0.279	-0.135	-1.844	NaN	-1.713
1966	118-UNSEP1.gel-no Vit 1.tif:286: L-22	2165	13642	1.183	2.188	0.243	1.129	-0.415	0.883
1967	118-UNSEP1.gel-no Vit 1.tif:287: L-23	1671	2002	0.913	0.321	-0.131	-1.639	NaN	-1.512
1968	118-UNSEP1.gel-no Vit 1.tif:288: L-24	1769	11036	0.967	1.77	-0.049	0.824	0.1	0.868
1969	118-UNSEP1.gel-no Vit 1.tif:289: M-1	2103	11041	1.149	1.771	0.201	0.824	-0.152	0.619
1970	118-UNSEP1.gel-no Vit 1.tif:290: M-2	2005	7859	1.096	1.26	0.132	0.334	0.485	0.198
1971	118-UNSEP1.gel-no Vit 1.tif:291: M-3	2148	7083	1.174	1.136	0.231	0.184	1.379	-0.052
1972	118-UNSEP1.gel-no Vit 1.tif:292: M-4	1821	5813	0.995	0.932	-0.007	-0.101	1.722	-0.098
1973	118-UNSEP1.gel-no Vit 1.tif:293: M-5	1876	8240	1.025	1.321	0.036	0.402	0.348	0.362
1974	118-UNSEP1.gel-no Vit 1.tif:294: M-6	1961	6919	1.072	1.11	0.1	0.15	-0.193	0.046
1975	118-UNSEP1.gel-no Vit 1.tif:295: M-7	2109	10465	1.152	1.678	0.205	0.747	0.152	0.538
1976	118-UNSEP1.gel-no Vit 1.tif:296: M-8	2584	9197	1.412	1.475	0.498	0.561	-0.222	0.059
1977	118-UNSEP1.gel-no Vit 1.tif:297: M-9	1823	6673	0.996	1.07	-0.006	0.098	0	0.099
1978	118-UNSEP1.gel-no Vit 1.tif:298: M-10	2025	4646	1.107	0.745	0.146	-0.425	1.7	-0.575
1979	118-UNSEP1.gel-no Vit 1.tif:299: M-11	2020	7059	1.104	1.132	0.143	0.179	-0.415	0.032
1980	118-UNSEP1.gel-no Vit 1.tif:300: M-12	2524	10303	1.379	1.652	0.464	0.724	0.628	0.256
1981	118-UNSEP1.gel-no Vit 1.tif:301: M-13	1903	1621	1.04	0.26	0.056	-1.944	NaN	-2.004
1982	118-UNSEP1.gel-no Vit 1.tif:302: M-14	1729	7722	0.945	1.238	-0.082	0.308	0.263	0.386
1983	118-UNSEP1.gel-no Vit 1.tif:303: M-15	2283	6172	1.248	0.99	0.319	-0.015	-0.222	-0.338
1984	118-UNSEP1.gel-no Vit 1.tif:304: M-16	2599	6598	1.42	1.058	0.506	0.081	1.28	-0.429
1985	118-UNSEP1.gel-no Vit 1.tif:305: M-17	1736	1692	0.949	0.271	-0.076	-1.882	NaN	-1.81
1986	118-UNSEP1.gel-no Vit 1.tif:306: M-18	1951	6703	1.066	1.075	0.092	0.104	-0.193	0.008
1987	118-UNSEP1.gel-no Vit 1.tif:307: M-19	1958	1725	1.07	0.277	0.098	-1.854	NaN	-1.956
1988	118-UNSEP1.gel-no Vit 1.tif:308: M-20	1847	8009	1.009	1.284	0.013	0.361	0.585	0.343
1989	118-UNSEP1.gel-no Vit 1.tif:309: M-21	2002	9645	1.094	1.547	0.13	0.629	0	0.495
1990	118-UNSEP1.gel-no Vit 1.tif:310: M-22	1655	1832	0.904	0.294	-0.145	-1.767	NaN	-1.626
1991	118-UNSEP1.gel-no Vit 1.tif:311: M-23	2031	11435	1.11	1.834	0.15	0.875	-0.263	0.72
1992	118-UNSEP1.gel-no Vit 1.tif:312: M-24	1975	12125	1.079	1.944	0.11	0.959	-0.263	0.845
1993	118-UNSEP1.gel-no Vit 1.tif:313: N-1	1879	5819	1.027	0.933	0.038	-0.1	2.044	-0.142
1994	118-UNSEP1.gel-no Vit 1.tif:314: N-2	1953	6776	1.067	1.087	0.094	0.12	0.663	0.022
1995	118-UNSEP1.gel-no Vit 1.tif:315: N-3	2268	9129	1.239	1.464	0.31	0.55	0	0.236
1996	118-UNSEP1.gel-no Vit 1.tif:316: N-4	1856	8684	1.014	1.393	0.02	0.478	0	0.453
1997	118-UNSEP1.gel-no Vit 1.tif:317: N-5	1604	1516	0.877	0.243	-0.19	-2.04	NaN	-1.854
1998	118-UNSEP1.gel-no Vit 1.tif:318: N-6	1586	1534	0.867	0.246	-0.206	-2.023	NaN	-1.821
1999	118-UNSEP1.gel-no Vit 1.tif:319: N-7	2030	8324	1.109	1.335	0.15	0.417	0.363	0.263
[truncated: 18,833 more rows]

## Sheet: lethals removed
	Label	YFP Max: no Vit	YFP Max: plus Vit	norm YFP Max: no Vit YFP	norm YFP Max: plus Vit YFP	log norm YFP Max: no Vit YFP	log norm YFP Max: plus Vit YFP	log-Area 6days:48 hrs Ratio	log YFP Ratio: norm plus Vit to norm no Vit	label			norm YFP Max: no Vit YFP	norm YFP Max: plus Vit YFP	log norm YFP Max: no Vit YFP	log norm YFP Max: plus Vit YFP	log-Area 6days:48 hrs Ratio	log YFP Ratio: norm plus Vit to norm no Vit			Label	YFP Max: no Vit	YFP Max: plus Vit	norm YFP Max: no Vit YFP	norm YFP Max: plus Vit YFP	log norm YFP Max: no Vit YFP	log norm YFP Max: plus Vit YFP	log-Area 6days:48 hrs Ratio	norm log-Max: plus to no Vit YFP Ratio	label	present on SR confirmed list?
1805	118-UNSEP1.gel-no Vit 1.tif:125: F-5	1933	1772	1.056	0.284	0.079	-1.815	1.773	-1.89465	silencer		average	1.15473	1.46093	0.173055	0.476428	0.381253	0.303375		12077	162-UNSEP1.gel-no Vit 2.tif:317: N-5	2806	2123	0.98	0.448	-0.03	-1.159	-0.322	-1.126	silencer	is really really small to begin with
2610	121-UNSEP1.gel-no Vit 2-1.tif:258: K-18	1990	2842	1.016	0.293	0.022	-1.77	1.778	-1.79393	silencer		stdev	0.286299	0.478594	0.304111	0.450611	0.690312	0.469147		742	113-UNSEP1.gel-no Vit 4.tif:70: C-22	1586	2800	0.822	0.417	-0.282	-1.262	0	-1.004	silencer
5518	130-UNSEP1-noVit-bot.tif:142: F-22	4094	2570	1.136	0.304	0.184	-1.716	2.204	-1.90182	silencer		cutoff (-3 stdev)	0.295832	0.0251456	-0.739278	-0.875404	-0.309059	-1.10407		4846	128-UNSEP1-noVit-bot.tif:142: F-22	2463	4391	0.69	0.547	-0.536	-0.871	0.087	-0.409	silencer	MP2RD2B6/ RP1 D12, partial Vipp2 silencing from Western
3829	125-UNSEP1-noVit-top.tif:133: F-13	3881	2485	1.059	0.309	0.083	-1.696	2.572	-1.77702	silencer		cutoff (+3 stdev)	2.01362	2.89671	1.08539	1.82826	1.07157	1.71082		5118	129-UNSEP1-noVit-top.tif:78: D-6	3797	5220	1.114	0.532	0.155	-0.911	0.263	-1.13	silencer	weak
4440	127-UNSEP1-noVit-top.tif:72: C-24	2863	2875	1.025	0.321	0.036	-1.637	2.389	-1.67498	silencer		silencer cutoff for plot			0	-0.875404				5506	130-UNSEP1-noVit-bot.tif:130: F-10	2649	4071	0.735	0.482	-0.444	-1.053	0.341	-0.671	silencer	sequenced, no comment on phenotype
897	113-UNSEP1.gel-no Vit 4.tif:225: J-9	1771	2231	0.918	0.332	-0.123	-1.589	1.728	-1.46731	silencer		activator cutoff for plot			1.08539	0				7703	145-UNSEP1.gel-no Vit 2.tif:311: M-23	3232	2817	0.74	0.508	-0.435	-0.977	0.485	-0.599	silencer
741	113-UNSEP1.gel-no Vit 4.tif:69: C-21	1705	2306	0.884	0.343	-0.178	-1.542	1.858	-1.36584	silencer		area cutoff			0	1.07157		0.546886		12260	163-UNSEP1.gel-no Vit 1.tif:164: G-20	2163	2922	0.756	0.515	-0.403	-0.957	0.503	-0.549	silencer
2462	121-UNSEP1.gel-no Vit 2-1.tif:110: E-14	1902	3327	0.971	0.343	-0.043	-1.543	1.899	-1.50126	silencer					0	0		-5.31355		6331	141-UNSEP1.gel-no Vit 6.tif:283: L-19	1973	2491	0.742	0.432	-0.43	-1.21	0.541	-0.777	silencer
4403	127-UNSEP1-noVit-top.tif:35: B-11	3455	3182	1.237	0.356	0.307	-1.491	2.637	-1.7969	silencer								-0.025714		8064	146-UNSEP1-noVit-top.tif:336: N-24	3596	3743	1.031	0.384	0.043	-1.383	0.553	-1.455	silencer	MARS1
2401	121-UNSEP1.gel-no Vit 2-1.tif:49: C-1	2246	3545	1.146	0.366	0.197	-1.452	1.807	-1.64669	silencer										12137	163-UNSEP1.gel-no Vit 1.tif:41: B-17	2530	3095	0.885	0.545	-0.177	-0.874	0.585	-0.692	silencer
13240	167-UNSEP1.gel-no Vit 3.tif:136: F-16	2339	2681	0.865	0.366	-0.209	-1.45	2.373	-1.24086	silencer										4226	126-UNSEP1-noVit-bot.tif:194: I-2	2620	3293	0.934	0.47	-0.098	-1.091	0.637	-1.104	silencer	weak
3828	125-UNSEP1-noVit-top.tif:132: F-12	5175	3032	1.412	0.377	0.498	-1.409	2.652	-1.9051	silencer										12101	163-UNSEP1.gel-no Vit 1.tif:5: A-5	5145	2631	1.799	0.464	0.847	-1.109	0.788	-1.95	silencer
13190	167-UNSEP1.gel-no Vit 3.tif:86: D-14	2618	2798	0.968	0.382	-0.047	-1.388	2.298	-1.34143	silencer		based on control analysis	norm YFP Max: no Vit YFP	norm YFP Max: plus Vit YFP	log norm YFP Max: no Vit YFP	log norm YFP Max: plus Vit YFP	log-Area 6days:48 hrs Ratio	log YFP Ratio: norm plus Vit to norm no Vit		2649	121-UNSEP1.gel-no Vit 2-1.tif:297: M-9	1728	4316	0.882	0.445	-0.181	-1.168	0.794	-0.99	silencer
8064	146-UNSEP1-noVit-top.tif:336: N-24	3596	3743	1.031	0.384	0.043	-1.383	0.553	-1.42487	silencer		average	1.15484	1.46219	0.173185	0.47873	0.379135	0.305736		11375	160-UNSEP1.gel-no Vit 4.tif:287: L-23	2729	2360	0.76	0.526	-0.395	-0.928	0.807	-0.534	silencer
4004	125-UNSEP1-noVit-top.tif:308: M-20	3463	3230	0.945	0.401	-0.082	-1.318	2.388	-1.23671	silencer		stdev	0.286393	0.477378	0.304185	0.445565	0.687839	0.464451		2377	121-UNSEP1.gel-no Vit 2-1.tif:25: B-1	2085	3913	1.064	0.404	0.09	-1.309	0.83	-1.402	silencer	weak only vit
2377	121-UNSEP1.gel-no Vit 2-1.tif:25: B-1	2085	3913	1.064	0.404	0.09	-1.309	0.83	-1.39707	silencer		cutoff (-3 stdev)	0.410223	0.221007	-0.617696	-0.679738	-0.308703	-1.08762		12881	166-UNSEP1.gel-no Vit 4.tif:113: E-17	3103	3222	0.717	0.536	-0.481	-0.899	0.848	-0.42	silencer
4183	126-UNSEP1-noVit-bot.tif:151: G-7	2964	2876	1.057	0.41	0.08	-1.286	2.295	-1.36628	silencer		cutoff (+3 stdev)	-0.780186	-0.0972396	1.91019	2.21288	1.06697	1.69909		5422	130-UNSEP1-noVit-bot.tif:46: B-22	3268	4264	0.907	0.505	-0.141	-0.986	0.858	-0.907	silencer
742	113-UNSEP1.gel-no Vit 4.tif:70: C-22	1586	2800	0.822	0.417	-0.282	-1.262	0	-0.979091	silencer		silencer cutoff for plot			0	-0.875404				1599	RP5-no Vit-UNSEP1-.tif:255: K-15	3778	3232	1.08273	0.33115	0.114668	-1.59445	0.737		silencer	MARS2
5598	130-UNSEP1-noVit-bot.tif:222: J-6	3516	3518	0.975	0.417	-0.036	-1.263	2.352	-1.22535	silencer		activator cutoff for plot			1.08539	0				10847	159-UNSEP1.gel-no Vit 5.tif:95: D-23	2131	2828	0.675	0.453	-0.566	-1.142	1.104	-0.573	silencer, suppressor
2333	120-UNSEP1.gel-no Vit 1.tif:317: N-5	2120	2409	1.086	0.423	0.119	-1.241	1.307	-1.36029	silencer										11848	162-UNSEP1.gel-no Vit 2.tif:88: D-16	2535	2581	0.885	0.544	-0.176	-0.877	1.193	-0.698	silencer, suppressor
5397	130-UNSEP1-noVit-bot.tif:21: A-21	4614	3650	1.28	0.432	0.356	-1.21	2.346	-1.56704	silencer										3093	123-UNSEP1-noVit-top.tif:69: C-21	2714	3822	0.934	0.52	-0.099	-0.943	1.28	-0.854	silencer, suppressor
6331	141-UNSEP1.gel-no Vit 6.tif:283: L-19	1973	2491	0.742	0.432	-0.43	-1.21	0.541	-0.780388	silencer										2333	120-UNSEP1.gel-no Vit 1.tif:317: N-5	2120	2409	1.086	0.423	0.119	-1.241	1.307	-1.368	silencer, suppressor
1829	118-UNSEP1.gel-no Vit 1.tif:149: G-5	2448	2758	1.338	0.442	0.42	-1.177	1.61	-1.59796	silencer										13128	167-UNSEP1.gel-no Vit 3.tif:24: A-24	2785	3994	1.03	0.545	0.042	-0.875	1.348	-0.93	silencer, suppressor
1198	114-UNSEP1.gel-no Vit 3.tif:190: H-22	1482	2606	0.824	0.444	-0.279	-1.17	1.732	-0.892085	silencer										1133	114-UNSEP1.gel-no Vit 3.tif:125: F-5	1720	2762	0.957	0.471	-0.064	-1.086	1.379	-1.051	silencer, suppressor
4908	128-UNSEP1-noVit-bot.tif:204: I-12	3097	3562	0.867	0.444	-0.206	-1.173	1.893	-0.965472	silencer										10989	159-UNSEP1.gel-no Vit 5.tif:237: J-21	3476	3114	1.101	0.499	0.139	-1.003	1.459	-1.14	silencer, suppressor
2649	121-UNSEP1.gel-no Vit 2-1.tif:297: M-9	1728	4316	0.882	0.445	-0.181	-1.168	0.794	-0.986973	silencer										546	111-UNSEP1.gel-no Vit 5.tif:210: I-18	1856	2484	0.968	0.482	-0.047	-1.054	1.485	-1.001	silencer, suppressor
2019	120-UNSEP1.gel-no Vit 1.tif:3: A-3	2698	2544	1.382	0.447	0.467	-1.162	1.659	-1.62841	silencer										12215	163-UNSEP1.gel-no Vit 1.tif:119: E-23	2410	3035	0.843	0.535	-0.247	-0.903	1.527	-0.65	silencer, suppressor
12077	162-UNSEP1.gel-no Vit 2.tif:317: N-5	2806	2123	0.98	0.448	-0.03	-1.159	-0.322	-1.12928	silencer										1829	118-UNSEP1.gel-no Vit 1.tif:149: G-5	2448	2758	1.338	0.442	0.42	-1.177	1.61	-1.601	silencer, suppressor
12155	163-UNSEP1.gel-no Vit 1.tif:59: C-11	2504	2550	0.875	0.449	-0.192	-1.154	1.807	-0.962568	silencer										12239	163-UNSEP1.gel-no Vit 1.tif:143: F-23	2683	2853	0.938	0.503	-0.092	-0.992	1.619	-0.894	silencer, suppressor
10847	159-UNSEP1.gel-no Vit 5.tif:95: D-23	2131	2828	0.675	0.453	-0.566	-1.142	1.104	-0.575376	silencer										12174	163-UNSEP1.gel-no Vit 1.tif:78: D-6	2736	3093	0.957	0.545	-0.064	-0.875	1.63	-0.806	silencer, suppressor
5181	129-UNSEP1-noVit-top.tif:141: F-21	2707	4520	0.794	0.461	-0.333	-1.119	1.716	-0.784372	silencer										2019	120-UNSEP1.gel-no Vit 1.tif:3: A-3	2698	2544	1.382	0.447	0.467	-1.162	1.659	-1.637	silencer, suppressor
12101	163-UNSEP1.gel-no Vit 1.tif:5: A-5	5145	2631	1.799	0.464	0.847	-1.109	0.788	-1.955	silencer										13142	167-UNSEP1.gel-no Vit 3.tif:38: B-14	2982	3985	1.103	0.544	0.141	-0.878	1.663	-1.032	silencer, suppressor
3133	123-UNSEP1-noVit-top.tif:109: E-13	2804	3421	0.965	0.465	-0.051	-1.103	2.636	-1.0533	silencer										658	111-UNSEP1.gel-no Vit 5.tif:322: N-10	1939	2590	1.011	0.502	0.016	-0.994	1.663	-1.004	silencer, suppressor
4226	126-UNSEP1-noVit-bot.tif:194: I-2	2620	3293	0.934	0.47	-0.098	-1.091	0.637	-0.990762	silencer										5224	129-UNSEP1-noVit-top.tif:184: H-16	3199	4980	0.938	0.507	-0.092	-0.979	1.692	-0.95	silencer, suppressor
1133	114-UNSEP1.gel-no Vit 3.tif:125: F-5	1720	2762	0.957	0.471	-0.064	-1.086	1.379	-1.02279	silencer										5181	129-UNSEP1-noVit-top.tif:141: F-21	2707	4520	0.794	0.461	-0.333	-1.119	1.716	-0.849	silencer, suppressor
2167	120-UNSEP1.gel-no Vit 1.tif:151: G-7	2100	2701	1.076	0.474	0.105	-1.076	2	-1.18272	silencer										897	113-UNSEP1.gel-no Vit 4.tif:225: J-9	1771	2231	0.918	0.332	-0.123	-1.589	1.728	-1.491	silencer, suppressor
1337	114-UNSEP1.gel-no Vit 3.tif:329: N-17	1533	2788	0.853	0.475	-0.23	-1.073	1.933	-0.844618	silencer										12157	163-UNSEP1.gel-no Vit 1.tif:61: C-13	2406	2738	0.841	0.483	-0.25	-1.051	1.728	-0.796	silencer, suppressor
3297	123-UNSEP1-noVit-top.tif:273: L-9	2628	3491	0.904	0.475	-0.145	-1.074	2.544	-0.928395	silencer										1198	114-UNSEP1.gel-no Vit 3.tif:190: H-22	1482	2606	0.824	0.444	-0.279	-1.17	1.732	-0.92	silencer, suppressor
13269	167-UNSEP1.gel-no Vit 3.tif:165: G-21	2382	3519	0.881	0.481	-0.183	-1.057	2.298	-0.873105	silencer										3521	124-UNSEP1-noVit-bot.tif:161: G-17	2521	2716	0.688	0.531	-0.541	-0.912	1.737	-0.436	silencer, suppressor
546	111-UNSEP1.gel-no Vit 5.tif:210: I-18	1856	2484	0.968	0.482	-0.047	-1.054	1.485	-1.00597	silencer										1805	118-UNSEP1.gel-no Vit 1.tif:125: F-5	1933	1772	1.056	0.284	0.079	-1.815	1.773	-1.898	silencer, suppressor
5506	130-UNSEP1-noVit-bot.tif:130: F-10	2649	4071	0.735	0.482	-0.444	-1.053	0.341	-0.608711	silencer										2610	121-UNSEP1.gel-no Vit 2-1.tif:258: K-18	1990	2842	1.016	0.293	0.022	-1.77	1.778	-1.796	silencer, suppressor
12157	163-UNSEP1.gel-no Vit 1.tif:61: C-13	2406	2738	0.841	0.483	-0.25	-1.051	1.728	-0.800083	silencer										2401	121-UNSEP1.gel-no Vit 2-1.tif:49: C-1	2246	3545	1.146	0.366	0.197	-1.452	1.807	-1.652	silencer, suppressor
2420	121-UNSEP1.gel-no Vit 2-1.tif:68: C-20	1957	4723	0.999	0.487	-0.002	-1.038	1.918	-1.03656	silencer										12155	163-UNSEP1.gel-no Vit 1.tif:59: C-11	2504	2550	0.875	0.449	-0.192	-1.154	1.807	-0.957	silencer, suppressor
4143	126-UNSEP1-noVit-bot.tif:111: E-15	2512	3444	0.896	0.491	-0.158	-1.026	2.48	-0.867776	silencer										741	113-UNSEP1.gel-no Vit 4.tif:69: C-21	1705	2306	0.884	0.343	-0.178	-1.542	1.858	-1.389	silencer, suppressor
13261	167-UNSEP1.gel-no Vit 3.tif:157: G-13	2550	3598	0.943	0.491	-0.085	-1.025	2.447	-0.941535	silencer										4908	128-UNSEP1-noVit-bot.tif:204: I-12	3097	3562	0.867	0.444	-0.206	-1.173	1.893	-1.041	silencer, suppressor
10989	159-UNSEP1.gel-no Vit 5.tif:237: J-21	3476	3114	1.101	0.499	0.139	-1.003	1.459	-1.1417	silencer										2462	121-UNSEP1.gel-no Vit 2-1.tif:110: E-14	1902	3327	0.971	0.343	-0.043	-1.543	1.899	-1.504	silencer, suppressor
658	111-UNSEP1.gel-no Vit 5.tif:322: N-10	1939	2590	1.011	0.502	0.016	-0.994	1.663	-1.01002	silencer										2420	121-UNSEP1.gel-no Vit 2-1.tif:68: C-20	1957	4723	0.999	0.487	-0.002	-1.038	1.918	-1.039	silencer, suppressor
12239	163-UNSEP1.gel-no Vit 1.tif:143: F-23	2683	2853	0.938	0.503	-0.092	-0.992	1.619	-0.89903	silencer										1337	114-UNSEP1.gel-no Vit 3.tif:329: N-17	1533	2788	0.853	0.475	-0.23	-1.073	1.933	-0.871	silencer, suppressor
5422	130-UNSEP1-noVit-bot.tif:46: B-22	3268	4264	0.907	0.505	-0.141	-0.986	0.858	-0.844819	silencer										2167	120-UNSEP1.gel-no Vit 1.tif:151: G-7	2100	2701	1.076	0.474	0.105	-1.076	2	-1.189	silencer, suppressor
5224	129-UNSEP1-noVit-top.tif:184: H-16	3199	4980	0.938	0.507	-0.092	-0.979	1.692	-0.887602	silencer										5134	129-UNSEP1-noVit-top.tif:94: D-22	3841	5114	1.127	0.521	0.172	-0.94	2.184	-1.176	silencer, suppressor
7703	145-UNSEP1.gel-no Vit 2.tif:311: M-23	3232	2817	0.74	0.508	-0.435	-0.977	0.485	-0.542697	silencer										5518	130-UNSEP1-noVit-bot.tif:142: F-22	4094	2570	1.136	0.304	0.184	-1.716	2.204	-1.962	silencer, suppressor
12260	163-UNSEP1.gel-no Vit 1.tif:164: G-20	2163	2922	0.756	0.515	-0.403	-0.957	0.503	-0.553814	silencer										4183	126-UNSEP1-noVit-bot.tif:151: G-7	2964	2876	1.057	0.41	0.08	-1.286	2.295	-1.478	silencer, suppressor
3093	123-UNSEP1-noVit-top.tif:69: C-21	2714	3822	0.934	0.52	-0.099	-0.943	1.28	-0.844911	silencer										13190	167-UNSEP1.gel-no Vit 3.tif:86: D-14	2618	2798	0.968	0.382	-0.047	-1.388	2.298	-1.355	silencer, suppressor
3801	125-UNSEP1-noVit-top.tif:105: E-9	5296	4189	1.445	0.52	0.531	-0.943	2.573	-1.47449	silencer										13269	167-UNSEP1.gel-no Vit 3.tif:165: G-21	2382	3519	0.881	0.481	-0.183	-1.057	2.298	-0.888	silencer, suppressor
5134	129-UNSEP1-noVit-top.tif:94: D-22	3841	5114	1.127	0.521	0.172	-0.94	2.184	-1.11313	silencer										5397	130-UNSEP1-noVit-bot.tif:21: A-21	4614	3650	1.28	0.432	0.356	-1.21	2.346	-1.629	silencer, suppressor
11375	160-UNSEP1.gel-no Vit 4.tif:287: L-23	2729	2360	0.76	0.526	-0.395	-0.928	0.807	-0.530937	silencer										5598	130-UNSEP1-noVit-bot.tif:222: J-6	3516	3518	0.975	0.417	-0.036	-1.263	2.352	-1.29	silencer, suppressor
2949	122-UNSEP1-noVit-bot.tif:261: K-21	3002	2840	1.223	0.528	0.29	-0.921	2.503	-1.21181	silencer										13240	167-UNSEP1.gel-no Vit 3.tif:136: F-16	2339	2681	0.865	0.366	-0.209	-1.45	2.373	-1.254	silencer, suppressor
3521	124-UNSEP1-noVit-bot.tif:161: G-17	2521	2716	0.688	0.531	-0.541	-0.912	1.737	-0.373697	silencer										4004	125-UNSEP1-noVit-top.tif:308: M-20	3463	3230	0.945	0.401	-0.082	-1.318	2.388	-1.268	silencer, suppressor
5118	129-UNSEP1-noVit-top.tif:78: D-6	3797	5220	1.114	0.532	0.155	-0.911	0.263	-1.06625	silencer										4440	127-UNSEP1-noVit-top.tif:72: C-24	2863	2875	1.025	0.321	0.036	-1.637	2.389	-1.668	silencer, suppressor
10916	159-UNSEP1.gel-no Vit 5.tif:164: G-20	2706	3341	0.857	0.535	-0.222	-0.901	2.83	-0.679756	silencer										13261	167-UNSEP1.gel-no Vit 3.tif:157: G-13	2550	3598	0.943	0.491	-0.085	-1.025	2.447	-0.954	silencer, suppressor
12215	163-UNSEP1.gel-no Vit 1.tif:119: E-23	2410	3035	0.843	0.535	-0.247	-0.903	1.527	-0.655994	silencer										4143	126-UNSEP1-noVit-bot.tif:111: E-15	2512	3444	0.896	0.491	-0.158	-1.026	2.48	-0.979	silencer, suppressor
12881	166-UNSEP1.gel-no Vit 4.tif:113: E-17	3103	3222	0.717	0.536	-0.481	-0.899	0.848	-0.41974	silencer										2949	122-UNSEP1-noVit-bot.tif:261: K-21	3002	2840	1.223	0.528	0.29	-0.921	2.503	-1.268	silencer, suppressor
11848	162-UNSEP1.gel-no Vit 2.tif:88: D-16	2535	2581	0.885	0.544	-0.176	-0.877	1.193	-0.702071	silencer										3297	123-UNSEP1-noVit-top.tif:273: L-9	2628	3491	0.904	0.475	-0.145	-1.074	2.544	-0.938	silencer, suppressor
13142	167-UNSEP1.gel-no Vit 3.tif:38: B-14	2982	3985	1.103	0.544	0.141	-0.878	1.663	-1.01975	silencer										3829	125-UNSEP1-noVit-top.tif:133: F-13	3881	2485	1.059	0.309	0.083	-1.696	2.572	-1.81	silencer, suppressor
12137	163-UNSEP1.gel-no Vit 1.tif:41: B-17	2530	3095	0.885	0.545	-0.177	-0.874	0.585	-0.699421	silencer										3801	125-UNSEP1-noVit-top.tif:105: E-9	5296	4189	1.445	0.52	0.531	-0.943	2.573	-1.505	silencer, suppressor
12174	163-UNSEP1.gel-no Vit 1.tif:78: D-6	2736	3093	0.957	0.545	-0.064	-0.875	1.63	-0.812263	silencer										3133	123-UNSEP1-noVit-top.tif:109: E-13	2804	3421	0.965	0.465	-0.051	-1.103	2.636	-1.061	silencer, suppressor
13128	167-UNSEP1.gel-no Vit 3.tif:24: A-24	2785	3994	1.03	0.545	0.042	-0.875	1.348	-0.918316	silencer										4403	127-UNSEP1-noVit-top.tif:35: B-11	3455	3182	1.237	0.356	0.307	-1.491	2.637	-1.793	silencer, suppressor
4846	128-UNSEP1-noVit-bot.tif:142: F-22	2463	4391	0.69	0.547	-0.536	-0.871	0.087	-0.335056	silencer										3828	125-UNSEP1-noVit-top.tif:132: F-12	5175	3032	1.412	0.377	0.498	-1.409	2.652	-1.938	silencer, suppressor
12770	166-UNSEP1.gel-no Vit 4.tif:2: A-2	4494	3292	1.038	0.548	0.054	-0.868	2.106	-0.921559											10916	159-UNSEP1.gel-no Vit 5.tif:164: G-20	2706	3341	0.857	0.535	-0.222	-0.901	2.83	-0.677	silencer, suppressor
13567	168-UNSEP1.gel-no Vit 2.tif:127: F-7	2674	3446	1.073	0.55	0.101	-0.861	2.367	-0.964147											168	110-UNSEP1.gel-no Vit 6.tif:168: G-24	8059	15228	4.267	2.427	2.093	1.279	0	-0.816	activator
2325	120-UNSEP1.gel-no Vit 1.tif:309: M-21	1934	3148	0.991	0.553	-0.014	-0.855	1.722	-0.841606											1728	118-UNSEP1.gel-no Vit 1.tif:48: B-24	8931	9672	4.88	1.551	2.287	0.633	0.585	-1.658	activator
4270	126-UNSEP1-noVit-bot.tif:238: J-22	2022	3881	0.721	0.553	-0.472	-0.853	1.621	-0.38272											2254	120-UNSEP1.gel-no Vit 1.tif:238: J-22	19413	6075	9.943	1.067	3.314	0.094	0	-3.228	activator
6070	141-UNSEP1.gel-no Vit 6.tif:22: A-22	1971	3188	0.741	0.553	-0.432	-0.855	0.107	-0.422194											2690	122-UNSEP1-noVit-bot.tif:2: A-2	5532	11043	2.254	2.053	1.172	1.038	0.107	-0.191	activator
13510	168-UNSEP1.gel-no Vit 2.tif:70: C-22	2032	3480	0.815	0.556	-0.295	-0.847	0.241	-0.551715											2703	122-UNSEP1-noVit-bot.tif:15: A-15	5224	9632	2.128	1.791	1.09	0.841	0.241	-0.305	activator	on SR list
1685	118-UNSEP1.gel-no Vit 1.tif:5: A-5	1830	3481	1	0.558	0	-0.841	1.341	-0.841663											2705	122-UNSEP1-noVit-bot.tif:17: A-17	6237	26198	2.541	4.871	1.345	2.284	0.503	0.883	activator
4891	128-UNSEP1-noVit-bot.tif:187: H-19	2365	4507	0.662	0.561	-0.595	-0.833	1.254	-0.23883											3050	123-UNSEP1-noVit-top.tif:26: B-2	10229	7531	3.52	1.025	1.816	0.035	1.385	-1.789	activator
12097	163-UNSEP1.gel-no Vit 1.tif:1: A-1	3612	3199	1.263	0.564	0.337	-0.827	1.903	-1.16309											3101	123-UNSEP1-noVit-top.tif:77: D-5	11881	12213	4.089	1.662	2.032	0.733	1.263	-1.308	activator
13296	167-UNSEP1.gel-no Vit 3.tif:192: H-24	2724	4148	1.007	0.566	0.01	-0.82	1.865	-0.83119											3336	123-UNSEP1-noVit-top.tif:312: M-24	6849	10349	2.357	1.408	1.237	0.494	1	-0.752	activator
12347	163-UNSEP1.gel-no Vit 1.tif:251: K-11	2263	3218	0.791	0.567	-0.338	-0.818	0.115	-0.480329											3724	125-UNSEP1-noVit-top.tif:28: B-4	8305	17187	2.266	2.135	1.18	1.094	0.807	-0.118	activator
2575	121-UNSEP1.gel-no Vit 2-1.tif:223: J-7	1995	5512	1.018	0.568	0.026	-0.815	1.305	-0.841775											3770	125-UNSEP1-noVit-top.tif:74: D-2	8300	9898	2.265	1.229	1.179	0.298	0.28	-0.913	activator
6078	141-UNSEP1.gel-no Vit 6.tif:30: B-6	2944	3281	1.107	0.569	0.147	-0.813	0.531	-0.960155											3985	125-UNSEP1-noVit-top.tif:289: M-1	8944	14054	2.441	1.746	1.287	0.804	-0.126	-0.515	activator
7728	145-UNSEP1.gel-no Vit 2.tif:336: N-24	3999	3154	0.915	0.569	-0.128	-0.814	0.354	-0.685343											4009	125-UNSEP1-noVit-top.tif:313: N-1	11636	10537	3.175	1.309	1.667	0.388	0.759	-1.31	activator
7993	146-UNSEP1-noVit-top.tif:265: L-1	2799	5555	0.802	0.569	-0.318	-0.813	0.415	-0.495174											4028	125-UNSEP1-noVit-top.tif:332: N-20	11543	13078	3.15	1.624	1.655	0.7	0.29	-0.987	activator
5527	130-UNSEP1-noVit-bot.tif:151: G-7	2978	4823	0.826	0.571	-0.275	-0.808	1.367	-0.532651											4156	126-UNSEP1-noVit-bot.tif:124: F-4	9067	6938	3.234	0.989	1.693	-0.015	0.17	-1.82	activator
7248	144-UNSEP1.gel-no Vit 3.tif:192: H-24	2167	2923	0.564	0.572	-0.826	-0.807	0.107	0.02032											4562	127-UNSEP1-noVit-top.tif:194: I-2	6787	18109	2.43	2.025	1.281	1.018	-0.087	-0.258	activator
307	110-UNSEP1.gel-no Vit 6.tif:307: M-19	2079	3625	1.101	0.578	0.139	-0.792	1.527	-0.929673											4708	128-UNSEP1-noVit-bot.tif:4: A-4	9754	11070	2.731	1.378	1.449	0.463	0.248	-1.061	activator
4116	126-UNSEP1-noVit-bot.tif:84: D-12	3694	4053	1.318	0.578	0.398	-0.791	-0.737	-1.18921											4712	128-UNSEP1-noVit-bot.tif:8: A-8	17395	14406	4.87	1.794	2.284	0.843	0.415	-1.515	activator	on SR list
5582	130-UNSEP1-noVit-bot.tif:206: I-14	3723	4896	1.033	0.58	0.047	-0.786	0.893	-0.832715											5163	129-UNSEP1-noVit-top.tif:123: F-3	12706	14252	3.727	1.452	1.898	0.538	0.115	-1.423	activator
12969	166-UNSEP1.gel-no Vit 4.tif:201: I-9	3727	3504	0.861	0.583	-0.216	-0.778	1.17	-0.562517											5185	129-UNSEP1-noVit-top.tif:145: G-1	8816	10552	2.586	1.075	1.371	0.105	1.27	-1.33	activator
11997	162-UNSEP1.gel-no Vit 2.tif:237: J-21	4415	2769	1.541	0.584	0.624	-0.776	0.415	-1.39983											5330	129-UNSEP1-noVit-top.tif:290: M-2	7354	14196	2.157	1.446	1.109	0.532	0.737	-0.64	activator
13446	168-UNSEP1.gel-no Vit 2.tif:6: A-6	3041	3658	1.22	0.584	0.287	-0.775	1.485	-1.06284											5380	130-UNSEP1-noVit-bot.tif:4: A-4	9876	13566	2.74	1.606	1.454	0.684	0.305	-0.833	activator
13857	68-UNSEP1.gel-no Vit 4.tif:81: D-9	1776	3776	0.917	0.585	-0.125	-0.775	1.611	-0.648485											5703	130-UNSEP1-noVit-bot.tif:327: N-15	11875	11289	3.294	1.337	1.72	0.419	0.524	-1.364	activator
3273	123-UNSEP1-noVit-top.tif:249: K-9	2293	4304	0.789	0.586	-0.342	-0.772	-0.152	-0.429125											6055	141-UNSEP1.gel-no Vit 6.tif:7: A-7	7678	8399	2.888	1.457	1.53	0.543	0.503	-0.984	activator
13500	168-UNSEP1.gel-no Vit 2.tif:60: C-12	2272	3677	0.911	0.587	-0.134	-0.768	1.957	-0.634091											6074	141-UNSEP1.gel-no Vit 6.tif:26: B-2	6459	8906	2.429	1.545	1.28	0.628	0.348	-0.65	activator
13984	68-UNSEP1.gel-no Vit 4.tif:208: I-16	2000	3793	1.033	0.587	0.047	-0.768	1	-0.815408											6101	141-UNSEP1.gel-no Vit 6.tif:53: C-5	5736	8550	2.157	1.483	1.109	0.569	0.322	-0.538	activator
7246	144-UNSEP1.gel-no Vit 3.tif:190: H-22	2719	3020	0.708	0.591	-0.498	-0.76	0.621	-0.260591											6194	141-UNSEP1.gel-no Vit 6.tif:146: G-2	6740	7209	2.535	1.251	1.342	0.323	0.503	-1.017	activator
12429	163-UNSEP1.gel-no Vit 1.tif:333: N-21	2954	3365	1.033	0.593	0.046	-0.754	2.248	-0.800736											8432	151-UNSEP1.gel-no Vit 2-1.tif:32: B-8	3230	2290	2.191	1.575	1.132	0.656	0.152	-0.482	activator
13158	167-UNSEP1.gel-no Vit 3.tif:54: C-6	2674	4382	0.989	0.598	-0.016	-0.741	1.914	-0.725825											8433	151-UNSEP1.gel-no Vit 2-1.tif:33: B-9	3745	2043	2.54	1.405	1.345	0.491	-0.363	-0.86	activator
7907	146-UNSEP1-noVit-top.tif:179: H-11	3097	5846	0.888	0.599	-0.172	-0.739	0	-0.568004											10084	158-UNSEP1.gel-no Vit 2.tif:4: A-4	3367	4103	2.197	2.162	1.136	1.113	-0.078	-0.019	activator
7648	145-UNSEP1.gel-no Vit 2.tif:256: K-16	2972	3338	0.68	0.602	-0.556	-0.732	0.415	-0.175771											10767	159-UNSEP1.gel-no Vit 5.tif:15: A-15	7095	8106	2.248	1.299	1.169	0.377	0.29	-0.789	activator
11781	162-UNSEP1.gel-no Vit 2.tif:21: A-21	2344	2853	0.818	0.602	-0.289	-0.732	0.199	-0.442337											10873	159-UNSEP1.gel-no Vit 5.tif:121: F-1	7262	14353	2.301	2.3	1.202	1.202	0.131	0.002	activator
12190	163-UNSEP1.gel-no Vit 1.tif:94: D-22	2394	3414	0.837	0.602	-0.257	-0.733	0.234	-0.475464											11143	160-UNSEP1.gel-no Vit 4.tif:55: C-7	9647	4653	2.688	1.036	1.427	0.051	1	-1.376	activator
5378	130-UNSEP1-noVit-bot.tif:2: A-2	4411	5094	1.224	0.603	0.291	-0.729	2.242	-1.02137											11152	160-UNSEP1.gel-no Vit 4.tif:64: C-16	7803	5494	2.174	1.224	1.121	0.291	0.503	-0.83	activator
10842	159-UNSEP1.gel-no Vit 5.tif:90: D-18	6123	3781	1.94	0.606	0.956	-0.723	1.926	-1.67867											11173	160-UNSEP1.gel-no Vit 4.tif:85: D-13	8281	7879	2.308	1.755	1.206	0.811	0.363	-0.396	activator
13218	167-UNSEP1.gel-no Vit 3.tif:114: E-18	2554	4444	0.944	0.607	-0.083	-0.721	2	-0.63709											11215	160-UNSEP1.gel-no Vit 4.tif:127: F-7	7741	7907	2.157	1.761	1.109	0.816	0.823	-0.293	activator
12143	163-UNSEP1.gel-no Vit 1.tif:47: B-23	3979	3448	1.391	0.608	0.476	-0.719	0.263	-1.19398											11448	161-UNSEP1.gel-no Vit 3.tif:24: A-24	5638	12540	2.397	4.078	1.261	2.028	0.254	0.764	activator
12957	166-UNSEP1.gel-no Vit 4.tif:189: H-21	4400	3653	1.016	0.608	0.023	-0.718	0.778	-0.740757											11699	161-UNSEP1.gel-no Vit 3.tif:275: L-11	6079	3938	2.584	1.281	1.37	0.357	1.747	-1.016	activator
13318	167-UNSEP1.gel-no Vit 3.tif:214: I-22	2381	4458	0.88	0.609	-0.184	-0.716	1.17	-0.531061											11948	162-UNSEP1.gel-no Vit 2.tif:188: H-20	7795	6273	2.721	1.323	1.444	0.404	0.193	-1.037	activator
13478	168-UNSEP1.gel-no Vit 2.tif:38: B-14	2882	3822	1.156	0.61	0.209	-0.712	1.729	-0.92226											12105	163-UNSEP1.gel-no Vit 1.tif:9: A-9	7638	7568	2.67	1.334	1.417	0.416	0.788	-0.996	activator
13122	167-UNSEP1.gel-no Vit 3.tif:18: A-18	2589	4473	0.957	0.611	-0.063	-0.711	1.492	-0.647347											12133	163-UNSEP1.gel-no Vit 1.tif:37: B-13	6391	5698	2.234	1.004	1.16	0.006	0.874	-1.148	activator
953	113-UNSEP1.gel-no Vit 4.tif:281: L-17	1711	4110	0.887	0.612	-0.173	-0.708	-0.193	-0.535402											12140	163-UNSEP1.gel-no Vit 1.tif:44: B-20	7847	5333	2.743	0.94	1.456	-0.089	1.138	-1.54	activator
12095	162-UNSEP1.gel-no Vit 2.tif:335: N-23	4282	2908	1.495	0.613	0.58	-0.705	0.817	-1.28619											12150	163-UNSEP1.gel-no Vit 1.tif:54: C-6	6120	8323	2.14	1.467	1.097	0.553	0.354	-0.539	activator
1182	114-UNSEP1.gel-no Vit 3.tif:174: H-6	1820	3602	1.012	0.614	0.018	-0.703	1.945	-0.720899											12264	163-UNSEP1.gel-no Vit 1.tif:168: G-24	6925	4662	2.421	0.822	1.276	-0.283	0.926	-1.554	activator
7223	144-UNSEP1.gel-no Vit 3.tif:167: G-23	3051	3144	0.794	0.615	-0.332	-0.702	0.485	-0.368553											12784	166-UNSEP1.gel-no Vit 4.tif:16: A-16	12543	7184	2.897	1.195	1.534	0.257	0.926	-1.278	activator
11308	160-UNSEP1.gel-no Vit 4.tif:220: J-4	3499	2761	0.975	0.615	-0.036	-0.702	0.83	-0.664816											12801	166-UNSEP1.gel-no Vit 4.tif:33: B-9	13435	8015	3.103	1.334	1.634	0.415	1	-1.219	activator
5704	130-UNSEP1-noVit-bot.tif:328: N-16	3344	5204	0.928	0.616	-0.108	-0.698	1.722	-0.591194											12803	166-UNSEP1.gel-no Vit 4.tif:35: B-11	11157	6569	2.577	1.093	1.365	0.128	0.926	-1.238	activator
7381	144-UNSEP1.gel-no Vit 3.tif:325: N-13	2550	3151	0.664	0.616	-0.591	-0.699	0.436	-0.108253											12864	166-UNSEP1.gel-no Vit 4.tif:96: D-24	9879	7055	2.281	1.174	1.19	0.231	0.71	-0.96	activator
7746	146-UNSEP1-noVit-top.tif:18: A-18	3940	6015	1.129	0.616	0.175	-0.698	-0.263	-0.874043											13357	167-UNSEP1.gel-no Vit 3.tif:253: K-13	6048	8717	2.236	1.19	1.161	0.251	1.17	-0.923	activator
12111	163-UNSEP1.gel-no Vit 1.tif:15: A-15	3118	3493	1.09	0.616	0.124	-0.7	1.705	-0.823326											13777	68-UNSEP1.gel-no Vit 4.tif:1: A-1	5599	6320	2.892	0.978	1.532	-0.031	0.1	-1.565	activator
11000	159-UNSEP1.gel-no Vit 5.tif:248: K-8	2606	3850	0.826	0.617	-0.276	-0.697	2.585	-0.420871											13801	68-UNSEP1.gel-no Vit 4.tif:25: B-1	5494	7558	2.837	1.17	1.505	0.227	0.087	-1.279	activator
7244	144-UNSEP1.gel-no Vit 3.tif:188: H-20	2605	3182	0.678	0.622	-0.56	-0.685	0.17	-0.124371											13827	68-UNSEP1.gel-no Vit 4.tif:51: C-3	4233	8077	2.186	1.25	1.128	0.322	0.585	-0.807	activator
12286	163-UNSEP1.gel-no Vit 1.tif:190: H-22	2625	3570	0.918	0.629	-0.124	-0.668	0.885	-0.545434											13849	68-UNSEP1.gel-no Vit 4.tif:73: D-1	4199	7162	2.169	1.109	1.117	0.149	0.585	-0.969	activator
5964	138-UNSEP1.gel-no Vit 1.tif:252: K-12	1832	2175	0.638	0.633	-0.649	-0.66	1.415	-0.0113509											14466	74-UNSEP1.gel-no Vit 3.tif:18: A-18	4056	8954	2.225	1.718	1.154	0.781	0.222	-0.384	activator
906	113-UNSEP1.gel-no Vit 4.tif:234: J-18	1721	4255	0.892	0.634	-0.164	-0.658	0.387	-0.492561											14467	74-UNSEP1.gel-no Vit 3.tif:19: A-19	4131	9546	2.266	1.832	1.18	0.873	0.115	-0.319	activator
5411	130-UNSEP1-noVit-bot.tif:35: B-11	5013	5356	1.391	0.634	0.476	-0.657	1.648	-1.13357											14471	74-UNSEP1.gel-no Vit 3.tif:23: A-23	4230	10270	2.321	1.97	1.215	0.979	0.093	-0.247	activator
6095	141-UNSEP1.gel-no Vit 6.tif:47: B-23	2181	3668	0.82	0.636	-0.286	-0.652	0.087	-0.366597											14517	74-UNSEP1.gel-no Vit 3.tif:69: C-21	4507	10472	2.473	2.009	1.306	1.007	0	-0.311	activator
12373	163-UNSEP1.gel-no Vit 1.tif:277: L-13	2330	3610	0.815	0.636	-0.296	-0.652	0.862	-0.357773											14684	74-UNSEP1.gel-no Vit 3.tif:236: J-20	3963	7032	2.174	1.349	1.12	0.432	0.263	-0.7	activator
11325	160-UNSEP1.gel-no Vit 4.tif:237: J-21	2650	2863	0.738	0.638	-0.437	-0.649	0.608	-0.210064											15072	76-UNSEP1.gel-no Vit 2.tif:288: L-24	3011	7252	2.132	1.351	1.092	0.434	0.29	-0.654	activator
4512	127-UNSEP1-noVit-top.tif:144: F-24	2493	5716	0.893	0.639	-0.164	-0.646	0.737	-0.482844											15132	77-UNSEP.gel-with Vit 1.tif:12: A-12	8071	2796	2.343	1.411	1.228	0.496	-0.1	-0.739	activator
13116	167-UNSEP1.gel-no Vit 3.tif:12: A-12	2812	4676	1.04	0.639	0.056	-0.647	1.624	-0.702696											15142	77-UNSEP.gel-with Vit 1.tif:22: A-22	7825	2610	2.271	1.317	1.183	0.397	0.181	-0.794	activator
7605	145-UNSEP1.gel-no Vit 2.tif:213: I-21	2990	3557	0.684	0.642	-0.547	-0.64	0.263	-0.091423											15144	77-UNSEP.gel-with Vit 1.tif:24: A-24	9023	2681	2.619	1.353	1.389	0.436	-0.087	-0.961	activator
13392	167-UNSEP1.gel-no Vit 3.tif:288: L-24	2290	4698	0.847	0.642	-0.24	-0.64	1.093	-0.399789											15158	77-UNSEP.gel-with Vit 1.tif:38: B-14	7356	2078	2.135	1.048	1.094	0.068	0	-1.034	activator
7676	145-UNSEP1.gel-no Vit 2.tif:284: L-20	3061	3568	0.701	0.644	-0.513	-0.636	0.193	-0.122354											15165	77-UNSEP.gel-with Vit 1.tif:45: B-21	8963	2269	2.602	1.145	1.379	0.195	-0.17	-1.192	activator
4651	127-UNSEP1-noVit-top.tif:283: L-19	4216	5765	1.51	0.645	0.594	-0.633	2.406	-1.22718											15194	77-UNSEP.gel-with Vit 1.tif:74: D-2	10053	4527	2.918	2.284	1.545	1.192	-0.082	-0.361	activator
7982	146-UNSEP1-noVit-top.tif:254: K-14	3038	6326	0.871	0.648	-0.2	-0.626	0.107	-0.426679											15240	77-UNSEP.gel-with Vit 1.tif:120: E-24	7438	2215	2.159	1.118	1.11	0.16	-0.1	-0.958	activator
2785	122-UNSEP1-noVit-bot.tif:97: E-1	2876	3490	1.172	0.649	0.229	-0.624	2.157	-0.852682											15269	77-UNSEP.gel-with Vit 1.tif:149: G-5	8247	2496	2.394	1.259	1.259	0.333	0	-0.934	activator
12139	163-UNSEP1.gel-no Vit 1.tif:43: B-19	2493	3690	0.872	0.65	-0.198	-0.621	0.637	-0.423888											15474	78-UNSEP1.gel-no Vit 6.tif:18: A-18	5105	10333	2.884	1.791	1.528	0.84	0.503	-0.744	activator
12207	163-UNSEP1.gel-no Vit 1.tif:111: E-15	2382	3691	0.833	0.65	-0.264	-0.62	0.926	-0.357877											15477	78-UNSEP1.gel-no Vit 6.tif:21: A-21	4683	10791	2.645	1.87	1.403	0.903	0.248	-0.557	activator
10942	159-UNSEP1.gel-no Vit 5.tif:190: H-22	3926	4067	1.244	0.652	0.315	-0.618	1.202	-0.932043											15480	78-UNSEP1.gel-no Vit 6.tif:24: A-24	4377	9115	2.472	1.58	1.306	0.66	0.415	-0.703	activator
7414	145-UNSEP1.gel-no Vit 2.tif:22: A-22	4255	3618	0.974	0.653	-0.038	-0.616	0.078	-0.576839											15500	78-UNSEP1.gel-no Vit 6.tif:44: B-20	4764	8561	2.691	1.484	1.428	0.569	0.637	-0.916	activator
12127	163-UNSEP1.gel-no Vit 1.tif:31: B-7	2670	3706	0.933	0.653	-0.099	-0.615	1.305	-0.514794											15503	78-UNSEP1.gel-no Vit 6.tif:47: B-23	4241	10029	2.396	1.738	1.26	0.797	0.263	-0.52	activator
12238	163-UNSEP1.gel-no Vit 1.tif:142: F-22	2803	3707	0.98	0.653	-0.029	-0.614	1.644	-0.585699											15504	78-UNSEP1.gel-no Vit 6.tif:48: B-24	4452	8677	2.515	1.504	1.33	0.588	0	-0.799	activator
7316	144-UNSEP1.gel-no Vit 3.tif:260: K-20	2391	3354	0.622	0.656	-0.684	-0.609	0.415	0.0767812											15528	78-UNSEP1.gel-no Vit 6.tif:72: C-24	5205	12320	2.94	2.135	1.556	1.094	-0.082	-0.519	activator
13817	68-UNSEP1.gel-no Vit 4.tif:41: B-17	1891	4240	0.977	0.656	-0.034	-0.607	-0.17	-0.574663											15576	78-UNSEP1.gel-no Vit 6.tif:120: E-24	4234	12388	2.392	2.147	1.258	1.102	-0.074	-0.213	activator
16217	80-UNSEP1.gel-no Vit 4.tif:89: D-17	1897	3601	0.917	0.656	-0.126	-0.608	0.436	-0.483226											15672	78-UNSEP1.gel-no Vit 6.tif:216: I-24	4383	11092	2.476	1.922	1.308	0.943	-0.17	-0.422	activator
11708	161-UNSEP1.gel-no Vit 3.tif:284: L-20	1969	2026	0.837	0.659	-0.257	-0.602	2.489	-0.344949											15696	78-UNSEP1.gel-no Vit 6.tif:240: J-24	4252	12673	2.402	2.196	1.264	1.135	-0.087	-0.186	activator
1774	118-UNSEP1.gel-no Vit 1.tif:94: D-22	1924	4119	1.051	0.661	0.072	-0.598	1.817	-0.66904											15765	78-UNSEP1.gel-no Vit 6.tif:309: M-21	3836	9929	2.167	1.721	1.116	0.783	0.322	-0.39	activator
7762	146-UNSEP1-noVit-top.tif:34: B-10	4023	6486	1.153	0.665	0.205	-0.59	1.617	-0.793966											15768	78-UNSEP1.gel-no Vit 6.tif:312: M-24	3908	10423	2.207	1.806	1.142	0.853	-0.193	-0.346	activator
5396	130-UNSEP1-noVit-bot.tif:20: A-20	3772	5629	1.046	0.667	0.065	-0.585	1.524	-0.649124											15794	79-UNSEP1.gel-no Vit 5.tif:2: A-2	6270	7206	2.714	1.739	1.44	0.798	0.17	-0.637	activator
12313	163-UNSEP1.gel-no Vit 1.tif:217: J-1	2722	3786	0.952	0.667	-0.072	-0.584	0.737	-0.513275											15913	79-UNSEP1.gel-no Vit 5.tif:121: F-1	5305	5973	2.296	1.442	1.199	0.528	0.515	-0.667	activator
2552	121-UNSEP1.gel-no Vit 2-1.tif:200: I-8	2322	6488	1.185	0.669	0.245	-0.58	1.474	-0.824809											15938	79-UNSEP1.gel-no Vit 5.tif:146: G-2	5099	6396	2.207	1.544	1.142	0.626	0.363	-0.511	activator
14018	68-UNSEP1.gel-no Vit 4.tif:242: K-2	2279	4319	1.177	0.669	0.235	-0.581	-0.322	-0.815036											16105	79-UNSEP1.gel-no Vit 5.tif:313: N-1	5018	5971	2.172	1.441	1.119	0.527	0.29	-0.587	activator
14769	74-UNSEP1.gel-no Vit 3.tif:321: N-9	1499	3493	0.822	0.67	-0.282	-0.577	0.363	-0.294977											16131	80-UNSEP1.gel-no Vit 4.tif:3: A-3	6204	8923	2.997	1.626	1.584	0.702	0.263	-0.881	activator
7389	144-UNSEP1.gel-no Vit 3.tif:333: N-21	2901	3442	0.755	0.673	-0.405	-0.571	0.387	-0.16587											16132	80-UNSEP1.gel-no Vit 4.tif:4: A-4	4735	8047	2.288	1.467	1.194	0.553	0.637	-0.641	activator
12236	163-UNSEP1.gel-no Vit 1.tif:140: F-20	3680	3816	1.287	0.673	0.364	-0.572	1	-0.935334											16141	80-UNSEP1.gel-no Vit 4.tif:13: A-13	4572	6513	2.209	1.187	1.143	0.247	0.263	-0.895	activator
13544	168-UNSEP1.gel-no Vit 2.tif:104: E-8	3274	4214	1.313	0.673	0.393	-0.571	0.881	-0.964189											16204	80-UNSEP1.gel-no Vit 4.tif:76: D-4	4868	8334	2.352	1.519	1.234	0.603	0.415	-0.63	activator
3718	125-UNSEP1-noVit-top.tif:22: A-22	3084	5428	0.842	0.674	-0.249	-0.569	0.628	-0.321072											16480	81-UNSEP1.gel-no Vit 3.tif:16: A-16	4533	6790	2.273	1.615	1.185	0.691	0.17	-0.494	activator
12131	163-UNSEP1.gel-no Vit 1.tif:35: B-11	2696	3827	0.943	0.674	-0.085	-0.568	1.233	-0.484509											16533	81-UNSEP1.gel-no Vit 3.tif:69: C-21	4825	6406	2.419	1.523	1.275	0.607	0.29	-0.668	activator
2265	120-UNSEP1.gel-no Vit 1.tif:249: K-9	1840	3844	0.942	0.675	-0.086	-0.567	-0.415	-0.48084											17160	87-UNSEP1.gel-no Vit 1.tif:24: A-24	6560	10167	2.175	3.5	1.121	1.807	1.441	0.684	activator
12188	163-UNSEP1.gel-no Vit 1.tif:92: D-20	4461	3828	1.56	0.675	0.641	-0.568	1.907	-1.20859											17306	87-UNSEP1.gel-no Vit 1.tif:170: H-2	6393	6260	2.12	2.155	1.084	1.108	0	0.022	activator
3837	125-UNSEP1-noVit-top.tif:141: F-21	3102	5442	0.847	0.676	-0.24	-0.565	1.848	-0.325339											17932	89-UNSEP1.gel-no Vit 3.tif:124: F-4	6902	9826	2.152	2.477	1.105	1.308	-0.126	0.203	activator
12187	163-UNSEP1.gel-no Vit 1.tif:91: D-19	2412	3843	0.843	0.677	-0.246	-0.562	0.678	-0.316377											18149	91-UNSEP1.gel-no Vit 4.tif:5: A-5	6893	8278	2.156	2.136	1.108	1.095	0.322	-0.014	activator
19339	94-UNSEP1.gel-no Vit 1.tif:187: H-19	1658	3949	0.857	0.677	-0.222	-0.564	1.126	-0.340139											19166	94-UNSEP1.gel-no Vit 1.tif:14: A-14	4930	11139	2.549	1.908	1.35	0.932	0.107	-0.439	activator
11981	162-UNSEP1.gel-no Vit 2.tif:221: J-5	3046	3213	1.063	0.678	0.089	-0.561	2	-0.648784											19391	94-UNSEP1.gel-no Vit 1.tif:239: J-23	4131	7649	2.136	1.31	1.095	0.39	0	-0.726	activator
501	111-UNSEP1.gel-no Vit 5.tif:165: G-21	1723	3505	0.898	0.679	-0.154	-0.558	1.7	-0.403304
4478	127-UNSEP1-noVit-top.tif:110: E-14	3454	6092	1.237	0.681	0.306	-0.554	2.147	-0.861119
11181	160-UNSEP1.gel-no Vit 4.tif:93: D-21	3122	3059	0.87	0.681	-0.201	-0.554	0.807	-0.353361
13534	168-UNSEP1.gel-no Vit 2.tif:94: D-22	2751	4264	1.104	0.681	0.142	-0.554	1.688	-0.697013
194	110-UNSEP1.gel-no Vit 6.tif:194: I-2	1606	4280	0.85	0.682	-0.234	-0.552	0.322	-0.317691
12191	163-UNSEP1.gel-no Vit 1.tif:95: D-23	2767	3870	0.967	0.682	-0.048	-0.552	0.28	-0.503744
14141	70-UNSEP1.gel-no Vit 4.tif:29: B-5	1813	3359	0.911	0.683	-0.134	-0.55	0.193	-0.415565
12305	163-UNSEP1.gel-no Vit 1.tif:209: I-17	2589	3896	0.905	0.687	-0.144	-0.542	1.478	-0.397608
12278	163-UNSEP1.gel-no Vit 1.tif:182: H-14	2323	3911	0.812	0.689	-0.3	-0.537	0.83	-0.236976
12380	163-UNSEP1.gel-no Vit 1.tif:284: L-20	2914	3912	1.019	0.689	0.027	-0.537	1.791	-0.564578
13481	168-UNSEP1.gel-no Vit 2.tif:41: B-17	2381	4314	0.955	0.689	-0.066	-0.537	1.644	-0.470997
4768	128-UNSEP1-noVit-bot.tif:64: C-16	2637	5543	0.738	0.69	-0.438	-0.535	1.04	-0.0970245
14761	74-UNSEP1.gel-no Vit 3.tif:313: N-1	1670	3614	0.916	0.693	-0.126	-0.528	0	-0.402492
2407	121-UNSEP1.gel-no Vit 2-1.tif:55: C-7	1944	6738	0.992	0.695	-0.011	-0.525	0.17	-0.513327
7485	145-UNSEP1.gel-no Vit 2.tif:93: D-21	3982	3855	0.912	0.695	-0.134	-0.524	0.248	-0.392021
12306	163-UNSEP1.gel-no Vit 1.tif:210: I-18	4045	3945	1.414	0.695	0.5	-0.524	1.248	-1.0247
4312	126-UNSEP1-noVit-bot.tif:280: L-16	2049	4881	0.731	0.696	-0.452	-0.523	0.193	-0.0707841
11269	160-UNSEP1.gel-no Vit 4.tif:181: H-13	3741	3128	1.042	0.697	0.06	-0.522	1.716	-0.580125
7103	144-UNSEP1.gel-no Vit 3.tif:47: B-23	2959	3572	0.77	0.698	-0.376	-0.518	0.193	-0.141631
7543	145-UNSEP1.gel-no Vit 2.tif:151: G-7	2919	3872	0.668	0.698	-0.582	-0.518	0.415	0.0633789
7723	145-UNSEP1.gel-no Vit 2.tif:331: N-19	3814	3872	0.873	0.698	-0.196	-0.518	0.387	-0.322755
12797	166-UNSEP1.gel-no Vit 4.tif:29: B-5	4898	4196	1.131	0.698	0.178	-0.518	1.453	-0.6963
12612	163REP2-UNSEP1.gel-no Vit 1.tif:180: H-12	2821	2187	0.503	0.7	-0.99	-0.514	2.087	0.476797
14046	68-UNSEP1.gel-no Vit 4.tif:270: L-6	1891	4522	0.977	0.7	-0.034	-0.514	-0.222	-0.481004
10950	159-UNSEP1.gel-no Vit 5.tif:198: I-6	2809	4377	0.89	0.701	-0.168	-0.512	0.585	-0.344391
12384	163-UNSEP1.gel-no Vit 1.tif:288: L-24	5585	3979	1.953	0.701	0.965	-0.512	0.848	-1.47821
12970	166-UNSEP1.gel-no Vit 4.tif:202: I-10	3292	4211	0.76	0.701	-0.395	-0.513	2.036	-0.116585
13008	166-UNSEP1.gel-no Vit 4.tif:240: J-24	3441	4212	0.795	0.701	-0.332	-0.513	0.31	-0.18154
13980	68-UNSEP1.gel-no Vit 4.tif:204: I-12	1989	4530	1.027	0.701	0.039	-0.512	1.193	-0.55095
14068	68-UNSEP1.gel-no Vit 4.tif:292: M-4	2053	4535	1.06	0.702	0.084	-0.51	-0.222	-0.594521
1688	118-UNSEP1.gel-no Vit 1.tif:8: A-8	1934	4381	1.057	0.703	0.08	-0.509	0.788	-0.588379
7726	145-UNSEP1.gel-no Vit 2.tif:334: N-22	4120	3907	0.943	0.705	-0.085	-0.505	1	-0.419635
7933	146-UNSEP1-noVit-top.tif:205: I-13	3056	6876	0.876	0.705	-0.191	-0.505	0	-0.313308
1000	113-UNSEP1.gel-no Vit 4.tif:328: N-16	2913	4737	1.511	0.706	0.595	-0.503	1.1	-1.09776
4500	127-UNSEP1-noVit-top.tif:132: F-12	3088	6317	1.106	0.706	0.145	-0.502	2.7	-0.647611
12168	163-UNSEP1.gel-no Vit 1.tif:72: C-24	3287	4019	1.149	0.708	0.201	-0.498	1.459	-0.698558
12710	163REP2-UNSEP1.gel-no Vit 1.tif:278: L-14	4599	2213	0.821	0.709	-0.285	-0.497	2.17	-0.211597
7387	144-UNSEP1.gel-no Vit 3.tif:331: N-19	2986	3631	0.777	0.71	-0.363	-0.494	0.263	-0.130096
7706	145-UNSEP1.gel-no Vit 2.tif:314: N-2	3664	3939	0.839	0.71	-0.254	-0.493	0.485	-0.240852
12432	163-UNSEP1.gel-no Vit 1.tif:336: N-24	4054	4028	1.417	0.71	0.503	-0.494	0.222	-0.996949
14560	74-UNSEP1.gel-no Vit 3.tif:112: E-16	1600	3705	0.878	0.711	-0.188	-0.492	0.222	-0.304371
942	113-UNSEP1.gel-no Vit 4.tif:270: L-6	1849	4778	0.959	0.712	-0.061	-0.491	0	-0.429654
4126	126-UNSEP1-noVit-bot.tif:94: D-22	2058	4996	0.734	0.712	-0.446	-0.489	0.193	-0.0439028
12189	163-UNSEP1.gel-no Vit 1.tif:93: D-21	3175	4045	1.11	0.713	0.151	-0.488	0.959	-0.638586
14012	68-UNSEP1.gel-no Vit 4.tif:236: J-20	2350	4607	1.214	0.713	0.279	-0.488	-0.737	-0.767794
5583	130-UNSEP1-noVit-bot.tif:207: I-15	2826	6037	0.784	0.715	-0.351	-0.484	0.515	-0.13291
7649	145-UNSEP1.gel-no Vit 2.tif:257: K-17	2847	3968	0.652	0.716	-0.618	-0.483	0.222	0.135088
10768	159-UNSEP1.gel-no Vit 5.tif:16: A-16	2727	4467	0.864	0.716	-0.211	-0.482	1.064	-0.271072
2221	120-UNSEP1.gel-no Vit 1.tif:205: I-13	1840	4085	0.942	0.718	-0.086	-0.479	-0.222	-0.391743
11396	160-UNSEP1.gel-no Vit 4.tif:308: M-20	3769	3226	1.05	0.718	0.071	-0.477	1.415	-0.548334
12113	163-UNSEP1.gel-no Vit 1.tif:17: A-17	3863	4074	1.351	0.718	0.434	-0.478	1.115	-0.911972
4459	127-UNSEP1-noVit-top.tif:91: D-19	2342	6438	0.839	0.72	-0.254	-0.474	0.918	-0.220674
7465	145-UNSEP1.gel-no Vit 2.tif:73: D-1	3377	3994	0.773	0.72	-0.371	-0.473	0.28	-0.102472
1953	118-UNSEP1.gel-no Vit 1.tif:273: L-9	1688	4497	0.922	0.721	-0.117	-0.472	0	-0.354767
7911	146-UNSEP1-noVit-top.tif:183: H-15	3173	7041	0.909	0.721	-0.137	-0.471	0.222	-0.334281
12497	163REP2-UNSEP1.gel-no Vit 1.tif:65: C-17	3996	2250	0.713	0.721	-0.488	-0.473	-0.138	0.0160972
16990	84-UNSEP1.gel-no Vit 2.tif:190: H-22	1623	4167	0.837	0.721	-0.257	-0.472	0.234	-0.215228
746	113-UNSEP1.gel-no Vit 4.tif:74: D-2	2384	4846	1.236	0.722	0.306	-0.47	1.926	-0.775608
4236	126-UNSEP1-noVit-bot.tif:204: I-12	2213	5064	0.789	0.722	-0.341	-0.47	1.322	-0.128026
5510	130-UNSEP1-noVit-bot.tif:134: F-14	3303	6097	0.916	0.722	-0.126	-0.47	1.426	-0.343349
5543	130-UNSEP1-noVit-bot.tif:167: G-23	2934	6100	0.814	0.722	-0.297	-0.469	0.678	-0.17303
2073	120-UNSEP1.gel-no Vit 1.tif:57: C-9	1890	4117	0.968	0.723	-0.047	-0.468	0.585	-0.421011
12478	163REP2-UNSEP1.gel-no Vit 1.tif:46: B-22	2659	2258	0.474	0.723	-1.076	-0.468	2.392	0.609109
13007	166-UNSEP1.gel-no Vit 4.tif:239: J-23	3677	4347	0.849	0.723	-0.236	-0.467	0.766	-0.231769
4480	127-UNSEP1-noVit-top.tif:112: E-16	2585	6477	0.926	0.724	-0.112	-0.465	0	-0.355022
7488	145-UNSEP1.gel-no Vit 2.tif:96: D-24	3999	4014	0.915	0.724	-0.128	-0.466	0.503	-0.337782
12249	163-UNSEP1.gel-no Vit 1.tif:153: G-9	2921	4110	1.021	0.724	0.03	-0.465	1.263	-0.495921
562	111-UNSEP1.gel-no Vit 5.tif:226: J-10	2010	3740	1.048	0.725	0.068	-0.464	0.72	-0.531586
7711	145-UNSEP1.gel-no Vit 2.tif:319: N-7	2960	4022	0.678	0.725	-0.562	-0.463	0.16	0.0966957
12618	163REP2-UNSEP1.gel-no Vit 1.tif:186: H-18	5116	2265	0.913	0.725	-0.131	-0.463	1.807	-0.332634
4332	126-UNSEP1-noVit-bot.tif:300: M-12	2090	5090	0.745	0.726	-0.424	-0.462	1.29	-0.0372709
7696	145-UNSEP1.gel-no Vit 2.tif:304: M-16	3312	4027	0.758	0.726	-0.399	-0.461	0.263	-0.0622283
11872	162-UNSEP1.gel-no Vit 2.tif:112: E-16	3335	3443	1.164	0.726	0.219	-0.461	1.303	-0.68105
7556	145-UNSEP1.gel-no Vit 2.tif:164: G-20	3296	4031	0.754	0.727	-0.406	-0.46	0.415	-0.0526092
12167	163-UNSEP1.gel-no Vit 1.tif:71: C-23	3084	4127	1.078	0.727	0.109	-0.459	0.222	-0.56833
6264	141-UNSEP1.gel-no Vit 6.tif:216: I-24	3053	4197	1.148	0.728	0.199	-0.458	0.644	-0.657112
6312	141-UNSEP1.gel-no Vit 6.tif:264: K-24	3337	4195	1.255	0.728	0.328	-0.458	0.485	-0.785677
11874	162-UNSEP1.gel-no Vit 2.tif:114: E-18	2464	3452	0.86	0.728	-0.217	-0.458	1.12	-0.240398
12467	163REP2-UNSEP1.gel-no Vit 1.tif:35: B-11	4805	2274	0.857	0.728	-0.222	-0.458	1.222	-0.235357
12591	163REP2-UNSEP1.gel-no Vit 1.tif:159: G-15	6109	2277	1.09	0.729	0.125	-0.456	0.918	-0.580337
17566	88-UNSEP1.gel-no Vit 2-1.tif:94: D-22	1962	3521	0.751	0.729	-0.412	-0.457	2.402	-0.0428941
18247	91-UNSEP1.gel-no Vit 4.tif:103: E-7	2696	2827	0.843	0.729	-0.246	-0.455	0	-0.209614
2486	121-UNSEP1.gel-no Vit 2-1.tif:134: F-14	1796	7081	0.917	0.73	-0.126	-0.453	0.29	-0.329025
12545	163REP2-UNSEP1.gel-no Vit 1.tif:113: E-17	3889	2286	0.694	0.732	-0.527	-0.45	1.585	0.076908
12663	163REP2-UNSEP1.gel-no Vit 1.tif:231: J-15	8503	2291	1.517	0.734	0.602	-0.447	0.628	-1.04737
12689	163REP2-UNSEP1.gel-no Vit 1.tif:257: K-17	6300	2291	1.124	0.734	0.169	-0.447	1	-0.61479
5389	130-UNSEP1-noVit-bot.tif:13: A-13	3469	6205	0.962	0.735	-0.055	-0.445	0.7	-0.388293
7144	144-UNSEP1.gel-no Vit 3.tif:88: D-16	2725	3767	0.709	0.737	-0.495	-0.441	0.248	0.055879
7673	145-UNSEP1.gel-no Vit 2.tif:281: L-17	3470	4086	0.794	0.737	-0.332	-0.44	1.158	-0.107474
6227	141-UNSEP1.gel-no Vit 6.tif:179: H-11	2090	4252	0.786	0.738	-0.347	-0.439	0.263	-0.0909085
11010	159-UNSEP1.gel-no Vit 5.tif:258: K-18	2302	4603	0.729	0.738	-0.455	-0.439	1.628	0.017702
11863	162-UNSEP1.gel-no Vit 2.tif:103: E-7	2238	3497	0.781	0.738	-0.356	-0.439	0.248	-0.0817017
11397	160-UNSEP1.gel-no Vit 4.tif:309: M-21	3782	3319	1.054	0.739	0.076	-0.436	1.16	-0.512229
12979	166-UNSEP1.gel-no Vit 4.tif:211: I-19	3303	4441	0.763	0.739	-0.391	-0.437	1.17	-0.0461087
13456	168-UNSEP1.gel-no Vit 2.tif:16: A-16	2515	4628	1.009	0.739	0.013	-0.436	1.17	-0.44928
11290	160-UNSEP1.gel-no Vit 4.tif:202: I-10	3636	3325	1.013	0.74	0.019	-0.433	1.17	-0.453037
13117	167-UNSEP1.gel-no Vit 3.tif:13: A-13	3685	5421	1.363	0.74	0.446	-0.434	2	-0.881188
7680	145-UNSEP1.gel-no Vit 2.tif:288: L-24	3957	4108	0.906	0.741	-0.143	-0.432	0.181	-0.290038
12855	166-UNSEP1.gel-no Vit 4.tif:87: D-15	4062	4454	0.938	0.741	-0.092	-0.432	1.441	-0.340114
6000	138-UNSEP1.gel-no Vit 1.tif:288: L-24	2051	2550	0.714	0.742	-0.486	-0.43	0.951	0.0554951
9835	156-UNSEP1.gel-no Vit 3.tif:91: D-19	1385	1137	0.838	0.742	-0.256	-0.431	0.913	-0.175531
15886	79-UNSEP1.gel-no Vit 5.tif:94: D-22	1810	3074	0.783	0.742	-0.352	-0.431	0.115	-0.0775931
4818	128-UNSEP1-noVit-bot.tif:114: E-18	2612	5966	0.731	0.743	-0.451	-0.429	0.737	0.0234908
10775	159-UNSEP1.gel-no Vit 5.tif:23: A-23	2250	4634	0.713	0.743	-0.488	-0.429	0.621	0.0594601
12659	163REP2-UNSEP1.gel-no Vit 1.tif:227: J-11	4984	2321	0.889	0.743	-0.169	-0.428	1.051	-0.258821
11326	160-UNSEP1.gel-no Vit 4.tif:238: J-22	3153	3342	0.879	0.744	-0.187	-0.426	0.348	-0.240561
12489	163REP2-UNSEP1.gel-no Vit 1.tif:57: C-9	4550	2322	0.812	0.744	-0.301	-0.427	1.833	-0.126177
12568	163REP2-UNSEP1.gel-no Vit 1.tif:136: F-16	4058	2322	0.724	0.744	-0.466	-0.427	1.637	0.0393129
13995	68-UNSEP1.gel-no Vit 4.tif:219: J-3	2028	4806	1.047	0.744	0.067	-0.427	-0.263	-0.492887
1978	118-UNSEP1.gel-no Vit 1.tif:298: M-10	2025	4646	1.107	0.745	0.146	-0.425	1.7	-0.571343
12332	163-UNSEP1.gel-no Vit 1.tif:236: J-20	2295	4226	0.802	0.745	-0.318	-0.425	1.392	-0.106362
12631	163REP2-UNSEP1.gel-no Vit 1.tif:199: I-7	5083	2328	0.907	0.745	-0.141	-0.424	1.445	-0.283862
7512	145-UNSEP1.gel-no Vit 2.tif:120: E-24	4535	4134	1.038	0.746	0.054	-0.423	0.893	-0.476559
11412	160-UNSEP1.gel-no Vit 4.tif:324: N-12	3422	3350	0.954	0.746	-0.069	-0.423	0.415	-0.354814
4190	126-UNSEP1-noVit-bot.tif:158: G-14	2733	5241	0.975	0.747	-0.037	-0.42	1.585	-0.384294
12584	163REP2-UNSEP1.gel-no Vit 1.tif:152: G-8	6343	2334	1.132	0.747	0.179	-0.42	1.087	-0.599694
13536	168-UNSEP1.gel-no Vit 2.tif:96: D-24	2692	4676	1.08	0.747	0.111	-0.421	1.383	-0.531851
11840	162-UNSEP1.gel-no Vit 2.tif:80: D-8	3916	3545	1.367	0.748	0.451	-0.419	1	-0.869903
17493	88-UNSEP1.gel-no Vit 2-1.tif:21: A-21	3290	3615	1.26	0.748	0.333	-0.419	-1	-0.752314
4412	127-UNSEP1-noVit-top.tif:44: B-20	3374	6698	1.208	0.749	0.273	-0.417	0.152	-0.689583
4520	127-UNSEP1-noVit-top.tif:152: G-8	2772	6707	0.993	0.75	-0.011	-0.415	0	-0.404903
7948	146-UNSEP1-noVit-top.tif:220: J-4	3231	7324	0.926	0.75	-0.111	-0.414	-0.415	-0.304122
12609	163REP2-UNSEP1.gel-no Vit 1.tif:177: H-9	7977	2343	1.423	0.75	0.509	-0.414	1.078	-0.923973
7480	145-UNSEP1.gel-no Vit 2.tif:88: D-16	3119	4164	0.714	0.751	-0.486	-0.413	0.093	0.0728888
7672	145-UNSEP1.gel-no Vit 2.tif:280: L-16	3037	4167	0.695	0.752	-0.525	-0.412	0.115	0.11372
11304	160-UNSEP1.gel-no Vit 4.tif:216: I-24	3697	3378	1.03	0.752	0.043	-0.411	1.276	-0.45384
7630	145-UNSEP1.gel-no Vit 2.tif:238: J-22	3946	4176	0.903	0.753	-0.147	-0.409	0.3	-0.262076
7698	145-UNSEP1.gel-no Vit 2.tif:306: M-18	3695	4172	0.846	0.753	-0.242	-0.41	1.322	-0.168008
12685	163REP2-UNSEP1.gel-no Vit 1.tif:253: K-13	6100	2351	1.089	0.753	0.122	-0.41	1	-0.532282
12466	163REP2-UNSEP1.gel-no Vit 1.tif:34: B-10	5643	2355	1.007	0.754	0.01	-0.407	1.051	-0.417427
15029	76-UNSEP1.gel-no Vit 2.tif:245: K-5	1547	4047	1.095	0.754	0.131	-0.408	0.515	-0.538294
2173	120-UNSEP1.gel-no Vit 1.tif:157: G-13	2039	4297	1.044	0.755	0.063	-0.406	0	-0.467573
2573	121-UNSEP1.gel-no Vit 2-1.tif:221: J-5	1913	7319	0.976	0.755	-0.034	-0.406	0.392	-0.370405
6373	141-UNSEP1.gel-no Vit 6.tif:325: N-13	2094	4351	0.788	0.755	-0.345	-0.406	0.547	-0.061719
11967	162-UNSEP1.gel-no Vit 2.tif:207: I-15	3646	3577	1.273	0.755	0.348	-0.406	0.652	-0.753684
12183	163-UNSEP1.gel-no Vit 1.tif:87: D-15	2462	4284	0.861	0.755	-0.216	-0.405	0.263	-0.189537
5099	129-UNSEP1-noVit-top.tif:59: C-11	3973	7420	1.165	0.756	0.221	-0.404	2.082	-0.623872
5553	130-UNSEP1-noVit-bot.tif:177: H-9	2935	6382	0.814	0.756	-0.296	-0.404	1.553	-0.106643
7364	144-UNSEP1.gel-no Vit 3.tif:308: M-20	3385	3864	0.881	0.756	-0.182	-0.404	0.082	-0.220756
2576	121-UNSEP1.gel-no Vit 2-1.tif:224: J-8	2046	7337	1.044	0.757	0.063	-0.402	0.628	-0.463757
16118	79-UNSEP1.gel-no Vit 5.tif:326: N-14	2069	3136	0.895	0.757	-0.159	-0.402	0	-0.241594
7208	144-UNSEP1.gel-no Vit 3.tif:152: G-8	2593	3878	0.675	0.758	-0.567	-0.399	0	0.16731
11075	159-UNSEP1.gel-no Vit 5.tif:323: N-11	2930	4733	0.928	0.758	-0.107	-0.399	0.83	-0.291927
12141	163-UNSEP1.gel-no Vit 1.tif:45: B-21	4234	4300	1.48	0.758	0.566	-0.4	1.115	-0.965327
12572	163REP2-UNSEP1.gel-no Vit 1.tif:140: F-20	5548	2368	0.99	0.758	-0.014	-0.399	1.503	-0.385231
12683	163REP2-UNSEP1.gel-no Vit 1.tif:251: K-11	5504	2369	0.982	0.759	-0.026	-0.399	2	-0.371623
17490	88-UNSEP1.gel-no Vit 2-1.tif:18: A-18	2166	3669	0.83	0.759	-0.27	-0.397	2.369	-0.129011
2730	122-UNSEP1-noVit-bot.tif:42: B-18	2293	4090	0.934	0.761	-0.098	-0.395	-1.737	-0.295526
7678	145-UNSEP1.gel-no Vit 2.tif:286: L-22	3223	4221	0.738	0.761	-0.439	-0.393	0.115	0.0442756
5558	130-UNSEP1-noVit-bot.tif:182: H-14	3000	6433	0.832	0.762	-0.265	-0.393	0.678	-0.126793
6356	141-UNSEP1.gel-no Vit 6.tif:308: M-20	2108	4395	0.793	0.762	-0.335	-0.391	0.322	-0.0575299
6371	141-UNSEP1.gel-no Vit 6.tif:323: N-11	2183	4392	0.821	0.762	-0.285	-0.392	0.322	-0.107591
12588	163REP2-UNSEP1.gel-no Vit 1.tif:156: G-12	5830	2379	1.04	0.762	0.057	-0.392	0.585	-0.448721
1197	114-UNSEP1.gel-no Vit 3.tif:189: H-21	1597	4476	0.888	0.763	-0.171	-0.39	1.379	-0.218877
3251	123-UNSEP1-noVit-top.tif:227: J-11	2311	5607	0.795	0.763	-0.33	-0.39	0.415	-0.0592718
3550	124-UNSEP1-noVit-bot.tif:190: H-22	2613	3902	0.713	0.764	-0.489	-0.389	1.078	0.0996706
7194	144-UNSEP1.gel-no Vit 3.tif:138: F-18	2711	3906	0.706	0.764	-0.503	-0.389	0.093	0.113904
7415	145-UNSEP1.gel-no Vit 2.tif:23: A-23	4849	4235	1.11	0.764	0.151	-0.389	0.181	-0.538915
7727	145-UNSEP1.gel-no Vit 2.tif:335: N-23	4781	4235	1.094	0.764	0.13	-0.389	0.212	-0.517968
12566	163REP2-UNSEP1.gel-no Vit 1.tif:134: F-14	3569	2385	0.637	0.764	-0.651	-0.389	2.222	0.262279
7812	146-UNSEP1-noVit-top.tif:84: D-12	3874	7463	1.11	0.765	0.151	-0.387	0.152	-0.537028
12335	163-UNSEP1.gel-no Vit 1.tif:239: J-23	2416	4340	0.845	0.765	-0.244	-0.387	0.193	-0.143492
13243	167-UNSEP1.gel-no Vit 3.tif:139: F-19	2806	5599	1.038	0.765	0.053	-0.387	2.03	-0.440275
14776	74-UNSEP1.gel-no Vit 3.tif:328: N-16	2526	3988	1.386	0.765	0.471	-0.386	-0.193	-0.857396
673	113-UNSEP1.gel-no Vit 4.tif:1: A-1	1922	5140	0.997	0.766	-0.005	-0.385	0.415	-0.380249
11513	161-UNSEP1.gel-no Vit 3.tif:89: D-17	2112	2361	0.898	0.768	-0.155	-0.381	2	-0.225609
12310	163-UNSEP1.gel-no Vit 1.tif:214: I-22	4489	4358	1.569	0.768	0.65	-0.381	1.222	-1.03067
13479	168-UNSEP1.gel-no Vit 2.tif:39: B-15	2314	4808	0.928	0.768	-0.107	-0.381	0.152	-0.273018
14011	68-UNSEP1.gel-no Vit 4.tif:235: J-19	1725	4960	0.891	0.768	-0.167	-0.381	-0.222	-0.214319
6050	141-UNSEP1.gel-no Vit 6.tif:2: A-2	3130	4430	1.177	0.769	0.235	-0.38	0.181	-0.614059
10914	159-UNSEP1.gel-no Vit 5.tif:162: G-18	2274	4798	0.721	0.769	-0.473	-0.379	1.29	0.0929843
12213	163-UNSEP1.gel-no Vit 1.tif:117: E-21	2467	4365	0.862	0.769	-0.213	-0.378	0.28	-0.164704
12370	163-UNSEP1.gel-no Vit 1.tif:274: L-10	2600	4361	0.909	0.769	-0.138	-0.38	1.644	-0.241297
2478	121-UNSEP1.gel-no Vit 2-1.tif:126: F-6	2165	7465	1.105	0.77	0.144	-0.377	0.72	-0.521116
12333	163-UNSEP1.gel-no Vit 1.tif:237: J-21	2463	4369	0.861	0.77	-0.216	-0.377	0.556	-0.161155
7343	144-UNSEP1.gel-no Vit 3.tif:287: L-23	3334	3944	0.868	0.771	-0.204	-0.375	0.152	-0.170964
7655	145-UNSEP1.gel-no Vit 2.tif:263: K-23	6011	4276	1.376	0.771	0.46	-0.375	0.485	-0.835678
12124	163-UNSEP1.gel-no Vit 1.tif:28: B-4	2722	4377	0.952	0.771	-0.072	-0.374	0.433	-0.304231
12904	166-UNSEP1.gel-no Vit 4.tif:136: F-16	3739	4632	0.863	0.771	-0.212	-0.376	1.585	-0.16263
14021	68-UNSEP1.gel-no Vit 4.tif:245: K-5	2162	4981	1.117	0.771	0.159	-0.375	-0.485	-0.534826
7724	145-UNSEP1.gel-no Vit 2.tif:332: N-20	3901	4279	0.893	0.772	-0.163	-0.374	0	-0.210059
13486	168-UNSEP1.gel-no Vit 2.tif:46: B-22	2158	4836	0.866	0.772	-0.208	-0.372	1.766	-0.165766
13531	168-UNSEP1.gel-no Vit 2.tif:91: D-19	2157	4835	0.865	0.772	-0.209	-0.373	0.503	-0.164099
14003	68-UNSEP1.gel-no Vit 4.tif:227: J-11	2262	4988	1.168	0.772	0.224	-0.373	-0.322	-0.597368
313	110-UNSEP1.gel-no Vit 6.tif:313: N-1	2613	4848	1.384	0.773	0.468	-0.372	0.807	-0.840304
7186	144-UNSEP1.gel-no Vit 3.tif:130: F-10	2563	3955	0.667	0.773	-0.584	-0.371	0.1	0.212782
7667	145-UNSEP1.gel-no Vit 2.tif:275: L-11	3286	4286	0.752	0.773	-0.411	-0.371	1.181	0.0397358
5098	129-UNSEP1-noVit-top.tif:58: C-10	4269	7600	1.252	0.774	0.324	-0.369	2.459	-0.693829
11951	162-UNSEP1.gel-no Vit 2.tif:191: H-23	3833	3669	1.338	0.774	0.42	-0.37	0.918	-0.789673
51	110-UNSEP1.gel-no Vit 6.tif:51: C-3	1929	4872	1.021	0.776	0.031	-0.365	0.737	-0.395854
7416	145-UNSEP1.gel-no Vit 2.tif:24: A-24	6361	4305	1.456	0.777	0.542	-0.365	0	-0.906024
12559	163REP2-UNSEP1.gel-no Vit 1.tif:127: F-7	5882	2426	1.05	0.777	0.07	-0.364	0.553	-0.434403
13075	166-UNSEP1.gel-no Vit 4.tif:307: M-19	4359	4667	1.007	0.777	0.01	-0.365	1.453	-0.374077
12488	163REP2-UNSEP1.gel-no Vit 1.tif:56: C-8	2724	2431	0.486	0.778	-1.041	-0.361	2.921	0.678814
7701	145-UNSEP1.gel-no Vit 2.tif:309: M-21	3481	4317	0.797	0.779	-0.328	-0.361	0.241	-0.0329564
12704	163REP2-UNSEP1.gel-no Vit 1.tif:272: L-8	4469	2433	0.797	0.779	-0.326	-0.36	1.415	-0.0329564
6165	141-UNSEP1.gel-no Vit 6.tif:117: E-21	2236	4499	0.841	0.78	-0.25	-0.358	0.663	-0.108632
12324	163-UNSEP1.gel-no Vit 1.tif:228: J-12	2435	4427	0.851	0.78	-0.232	-0.358	0.585	-0.125685
12637	163REP2-UNSEP1.gel-no Vit 1.tif:205: I-13	6260	2436	1.117	0.78	0.16	-0.358	1.17	-0.518083
12715	163REP2-UNSEP1.gel-no Vit 1.tif:283: L-19	3852	2437	0.687	0.78	-0.541	-0.358	1.807	0.183164
13072	166-UNSEP1.gel-no Vit 4.tif:304: M-16	3507	4690	0.81	0.78	-0.304	-0.358	1.273	-0.0544478
12561	163REP2-UNSEP1.gel-no Vit 1.tif:129: F-9	6703	2438	1.196	0.781	0.258	-0.357	0.954	-0.614823
2225	120-UNSEP1.gel-no Vit 1.tif:209: I-17	2142	4455	1.097	0.783	0.134	-0.354	1.967	-0.486479
4179	126-UNSEP1-noVit-bot.tif:147: G-3	3385	5493	1.207	0.783	0.272	-0.352	2.237	-0.624341
8086	150-UNSEP1.gel-no Vit 1.tif:22: A-22	1918	1228	1.097	0.783	0.133	-0.353	2.926	-0.486479
10769	159-UNSEP1.gel-no Vit 5.tif:17: A-17	4239	4888	1.343	0.783	0.426	-0.352	2	-0.778375
12640	163REP2-UNSEP1.gel-no Vit 1.tif:208: I-16	6581	2446	1.174	0.783	0.232	-0.352	0.585	-0.584348
13247	167-UNSEP1.gel-no Vit 3.tif:143: F-23	2395	5732	0.886	0.783	-0.175	-0.353	1.823	-0.178294
13463	168-UNSEP1.gel-no Vit 2.tif:23: A-23	2696	4899	1.082	0.783	0.113	-0.354	0.485	-0.466616
7361	144-UNSEP1.gel-no Vit 3.tif:305: M-17	3074	4007	0.8	0.784	-0.321	-0.352	0	-0.0291463
12657	163REP2-UNSEP1.gel-no Vit 1.tif:225: J-9	8172	2448	1.458	0.784	0.544	-0.351	1.064	-0.895065
7388	144-UNSEP1.gel-no Vit 3.tif:332: N-20	3758	4017	0.978	0.785	-0.032	-0.348	0.585	-0.317142
12407	163-UNSEP1.gel-no Vit 1.tif:311: M-23	3893	4456	1.361	0.785	0.445	-0.349	0.807	-0.793903
12490	163REP2-UNSEP1.gel-no Vit 1.tif:58: C-10	6027	2452	1.076	0.785	0.105	-0.349	0.954	-0.454914
12653	163REP2-UNSEP1.gel-no Vit 1.tif:221: J-5	6200	2450	1.106	0.785	0.146	-0.35	1.044	-0.494587
11970	162-UNSEP1.gel-no Vit 2.tif:210: I-18	3973	3725	1.387	0.786	0.472	-0.348	0.807	-0.819367
12560	163REP2-UNSEP1.gel-no Vit 1.tif:128: F-8	9290	2454	1.658	0.786	0.729	-0.348	1	-1.07684
20489	97-UNSEP1.gel-no Vit 3.tif:329: N-17	2992	2822	0.92	0.786	-0.12	-0.347	2.668	-0.227105
14044	68-UNSEP1.gel-no Vit 4.tif:268: L-4	1911	5090	0.987	0.788	-0.019	-0.344	-0.222	-0.324854
5067	129-UNSEP1-noVit-top.tif:27: B-3	3915	7745	1.148	0.789	0.199	-0.342	0.869	-0.541025
6158	141-UNSEP1.gel-no Vit 6.tif:110: E-14	2352	4548	0.885	0.789	-0.177	-0.342	0.322	-0.165652
12274	163-UNSEP1.gel-no Vit 1.tif:178: H-10	2363	4477	0.826	0.789	-0.276	-0.342	0.637	-0.0661165
19221	94-UNSEP1.gel-no Vit 1.tif:69: C-21	1761	4605	0.91	0.789	-0.135	-0.342	-0.082	-0.205841
4267	126-UNSEP1-noVit-bot.tif:235: J-19	2053	5545	0.732	0.791	-0.45	-0.339	0	0.111834
697	113-UNSEP1.gel-no Vit 4.tif:25: B-1	2985	5320	1.548	0.792	0.63	-0.336	0.469	-0.966833
7238	144-UNSEP1.gel-no Vit 3.tif:182: H-14	2924	4052	0.761	0.792	-0.394	-0.336	0.1	0.057604
7331	144-UNSEP1.gel-no Vit 3.tif:275: L-11	3043	4050	0.792	0.792	-0.336	-0.337	0.193	0
10771	159-UNSEP1.gel-no Vit 5.tif:19: A-19	2889	4942	0.915	0.792	-0.127	-0.336	1.245	-0.208271
11154	160-UNSEP1.gel-no Vit 4.tif:66: C-18	5043	3556	1.405	0.792	0.491	-0.337	0.541	-0.826998
12205	163-UNSEP1.gel-no Vit 1.tif:109: E-13	2855	4494	0.998	0.792	-0.003	-0.336	0.628	-0.333539
12666	163REP2-UNSEP1.gel-no Vit 1.tif:234: J-18	6304	2473	1.125	0.792	0.17	-0.337	0.848	-0.506353
4117	126-UNSEP1-noVit-bot.tif:85: D-13	2752	5558	0.982	0.793	-0.027	-0.335	0.652	-0.308402
7392	144-UNSEP1.gel-no Vit 3.tif:336: N-24	3544	4054	0.923	0.793	-0.116	-0.335	0.074	-0.21901
7496	145-UNSEP1.gel-no Vit 2.tif:104: E-8	3055	4395	0.699	0.793	-0.516	-0.335	0.206	0.182028
7717	145-UNSEP1.gel-no Vit 2.tif:325: N-13	3721	4398	0.852	0.793	-0.231	-0.334	1.093	-0.103533
12161	163-UNSEP1.gel-no Vit 1.tif:65: C-17	3089	4501	1.08	0.793	0.111	-0.334	1.644	-0.445639
12620	163REP2-UNSEP1.gel-no Vit 1.tif:188: H-20	5507	2477	0.983	0.793	-0.025	-0.334	0.7	-0.309871
7484	145-UNSEP1.gel-no Vit 2.tif:92: D-20	3882	4400	0.889	0.794	-0.17	-0.333	0.206	-0.163044
7120	144-UNSEP1.gel-no Vit 3.tif:64: C-16	3534	4066	0.92	0.795	-0.12	-0.331	0.322	-0.210679
13549	168-UNSEP1.gel-no Vit 2.tif:109: E-13	2297	4981	0.921	0.796	-0.118	-0.33	0.807	-0.210433
17741	88-UNSEP1.gel-no Vit 2-1.tif:269: L-5	2241	3845	0.858	0.796	-0.221	-0.33	0.29	-0.108209
12206	163-UNSEP1.gel-no Vit 1.tif:110: E-14	4673	4522	1.634	0.797	0.708	-0.327	1.1	-1.03576
12762	163REP2-UNSEP1.gel-no Vit 1.tif:330: N-18	3667	2488	0.654	0.797	-0.612	-0.328	-1	0.285289
14023	68-UNSEP1.gel-no Vit 4.tif:247: K-7	2352	5150	1.215	0.797	0.281	-0.327	0	-0.608305
16788	81-UNSEP1.gel-no Vit 3.tif:324: N-12	1768	3351	0.887	0.797	-0.174	-0.328	0.138	-0.154354
1162	114-UNSEP1.gel-no Vit 3.tif:154: G-10	1911	4681	1.063	0.798	0.088	-0.325	0.497	-0.413681
3924	125-UNSEP1-noVit-top.tif:228: J-12	3483	6426	0.95	0.798	-0.073	-0.325	0.415	-0.251539
4296	126-UNSEP1-noVit-bot.tif:264: K-24	4158	5593	1.483	0.798	0.569	-0.326	0.447	-0.894058
7090	144-UNSEP1.gel-no Vit 3.tif:34: B-10	3673	4081	0.956	0.798	-0.065	-0.326	1.263	-0.260622
2047	120-UNSEP1.gel-no Vit 1.tif:31: B-7	2337	4550	1.197	0.799	0.259	-0.323	0.796	-0.583156
11378	160-UNSEP1.gel-no Vit 4.tif:290: M-2	3278	3589	0.913	0.799	-0.131	-0.323	0.531	-0.192419
7294	144-UNSEP1.gel-no Vit 3.tif:238: J-22	2818	4089	0.734	0.8	-0.447	-0.323	0.115	0.12422
12235	163-UNSEP1.gel-no Vit 1.tif:139: F-19	3052	4537	1.067	0.8	0.094	-0.323	0.943	-0.415488
13379	167-UNSEP1.gel-no Vit 3.tif:275: L-11	2439	5858	0.902	0.8	-0.149	-0.322	1.485	-0.173127
6113	141-UNSEP1.gel-no Vit 6.tif:65: C-17	3701	4617	1.392	0.801	0.477	-0.32	0.379	-0.797285
7551	145-UNSEP1.gel-no Vit 2.tif:159: G-15	3401	4443	0.779	0.801	-0.361	-0.319	0.241	0.0401789
12307	163-UNSEP1.gel-no Vit 1.tif:211: I-19	2369	4545	0.828	0.801	-0.272	-0.32	1	-0.0478285
14042	68-UNSEP1.gel-no Vit 4.tif:266: L-2	1896	5172	0.979	0.801	-0.03	-0.321	0.585	-0.289507
12144	163-UNSEP1.gel-no Vit 1.tif:48: B-24	5163	4552	1.805	0.802	0.852	-0.318	1.3	-1.17032
7125	144-UNSEP1.gel-no Vit 3.tif:69: C-21	3137	4105	0.817	0.803	-0.292	-0.317	0.078	-0.0249361
7959	146-UNSEP1-noVit-top.tif:231: J-15	3757	7834	1.077	0.803	0.107	-0.317	1.898	-0.423546
13388	167-UNSEP1.gel-no Vit 3.tif:284: L-20	2148	5882	0.794	0.803	-0.332	-0.316	0.628	0.016261
2411	121-UNSEP1.gel-no Vit 2-1.tif:59: C-11	1938	7799	0.989	0.804	-0.016	-0.314	0.436	-0.298775
5132	129-UNSEP1-noVit-top.tif:92: D-20	2723	7888	0.799	0.804	-0.324	-0.315	0.107	0.009
5430	130-UNSEP1-noVit-bot.tif:54: C-6	3149	6789	0.874	0.804	-0.195	-0.315	0.392	-0.120438
6596	142-UNSEP1.gel-no Vit 5.tif:212: I-20	2672	3431	0.64	0.804	-0.644	-0.315	0.341	0.329124
11145	160-UNSEP1.gel-no Vit 4.tif:57: C-9	3452	3611	0.962	0.804	-0.056	-0.314	0.16	-0.258841
13099	166-UNSEP1.gel-no Vit 4.tif:331: N-19	4383	4834	1.012	0.804	0.018	-0.314	1.527	-0.331942
13505	168-UNSEP1.gel-no Vit 2.tif:65: C-17	2271	5041	0.911	0.805	-0.134	-0.313	1	-0.178462
12012	162-UNSEP1.gel-no Vit 2.tif:252: K-12	2528	3823	0.883	0.806	-0.18	-0.31	1.344	-0.131634
12602	163REP2-UNSEP1.gel-no Vit 1.tif:170: H-2	6011	2516	1.073	0.806	0.101	-0.312	2.078	-0.412798
14045	68-UNSEP1.gel-no Vit 4.tif:269: L-5	2010	5203	1.038	0.806	0.054	-0.312	-0.222	-0.364955
2405	121-UNSEP1.gel-no Vit 2-1.tif:53: C-5	2189	7820	1.117	0.807	0.16	-0.31	1.659	-0.468989
7580	145-UNSEP1.gel-no Vit 2.tif:188: H-20	3315	4474	0.759	0.807	-0.398	-0.309	0.115	0.0884688
12022	162-UNSEP1.gel-no Vit 2.tif:262: K-22	2989	3825	1.043	0.807	0.061	-0.31	1.396	-0.370099
16777	81-UNSEP1.gel-no Vit 3.tif:313: N-1	1817	3394	0.911	0.807	-0.134	-0.309	0	-0.174882
5687	130-UNSEP1-noVit-bot.tif:311: M-23	3395	6822	0.942	0.808	-0.086	-0.308	0.71	-0.221372
11928	162-UNSEP1.gel-no Vit 2.tif:168: G-24	3656	3830	1.276	0.808	0.352	-0.308	0.926	-0.659201
12601	163REP2-UNSEP1.gel-no Vit 1.tif:169: H-1	7212	2524	1.287	0.808	0.364	-0.307	0.524	-0.671585
12635	163REP2-UNSEP1.gel-no Vit 1.tif:203: I-11	5217	2522	0.931	0.808	-0.103	-0.308	0.788	-0.204426
7486	145-UNSEP1.gel-no Vit 2.tif:94: D-22	4643	4486	1.063	0.809	0.088	-0.305	0.193	-0.39393
7632	145-UNSEP1.gel-no Vit 2.tif:240: J-24	3744	4488	0.857	0.81	-0.223	-0.305	0.1	-0.0813733
3350	123-UNSEP1-noVit-top.tif:326: N-14	2629	5963	0.905	0.811	-0.144	-0.302	0.893	-0.158216
12629	163REP2-UNSEP1.gel-no Vit 1.tif:197: I-5	6487	2531	1.158	0.811	0.211	-0.303	1	-0.513861
11950	162-UNSEP1.gel-no Vit 2.tif:190: H-22	3455	3851	1.206	0.812	0.27	-0.3	0.907	-0.570678
12681	163REP2-UNSEP1.gel-no Vit 1.tif:249: K-9	2508	2537	0.448	0.812	-1.16	-0.3	1.234	0.857981
14024	68-UNSEP1.gel-no Vit 4.tif:248: K-8	2044	5242	1.056	0.812	0.078	-0.301	-0.263	-0.379058
7221	144-UNSEP1.gel-no Vit 3.tif:165: G-21	3076	4157	0.801	0.813	-0.32	-0.299	0.093	0.0214531
7287	144-UNSEP1.gel-no Vit 3.tif:231: J-15	2799	4157	0.729	0.813	-0.457	-0.299	0.107	0.157337
11230	160-UNSEP1.gel-no Vit 4.tif:142: F-22	3380	3650	0.942	0.813	-0.086	-0.299	0.585	-0.212472
1884	118-UNSEP1.gel-no Vit 1.tif:204: I-12	1751	5074	0.957	0.814	-0.064	-0.297	0.222	-0.23349
6323	141-UNSEP1.gel-no Vit 6.tif:275: L-11	2620	4695	0.985	0.814	-0.021	-0.296	1.503	-0.275095
7122	144-UNSEP1.gel-no Vit 3.tif:66: C-18	3022	4163	0.787	0.814	-0.346	-0.297	0.17	0.0486652
15545	78-UNSEP1.gel-no Vit 6.tif:89: D-17	2001	4696	1.13	0.814	0.177	-0.297	1	-0.473222
12044	162-UNSEP1.gel-no Vit 2.tif:284: L-20	2423	3861	0.846	0.815	-0.242	-0.296	0.078	-0.0538576
12045	162-UNSEP1.gel-no Vit 2.tif:285: L-21	2392	3863	0.835	0.815	-0.26	-0.295	0.507	-0.0349761
12757	163REP2-UNSEP1.gel-no Vit 1.tif:325: N-13	6057	2546	1.081	0.815	0.112	-0.295	0.794	-0.407495
6245	141-UNSEP1.gel-no Vit 6.tif:197: I-5	2448	4704	0.921	0.816	-0.119	-0.293	0.138	-0.174632
7075	144-UNSEP1.gel-no Vit 3.tif:19: A-19	3237	4172	0.843	0.816	-0.247	-0.294	0	-0.0469635
13523	168-UNSEP1.gel-no Vit 2.tif:83: D-11	2255	5107	0.905	0.816	-0.145	-0.294	1.322	-0.149349
4680	127-UNSEP1-noVit-top.tif:312: M-24	2795	7309	1.001	0.817	0.001	-0.291	1.363	-0.293034
7295	144-UNSEP1.gel-no Vit 3.tif:239: J-23	3138	4177	0.817	0.817	-0.292	-0.292	0.206	0
12984	166-UNSEP1.gel-no Vit 4.tif:216: I-24	5703	4908	1.317	0.817	0.397	-0.292	1.17	-0.688847
12372	163-UNSEP1.gel-no Vit 1.tif:276: L-12	3710	4639	1.297	0.818	0.375	-0.291	0.907	-0.665006
12603	163REP2-UNSEP1.gel-no Vit 1.tif:171: H-3	5924	2555	1.057	0.818	0.08	-0.289	0.459	-0.369803
14080	68-UNSEP1.gel-no Vit 4.tif:304: M-16	1935	5284	0.999	0.818	-0.0009938	-0.29	0.193	-0.288384
7700	145-UNSEP1.gel-no Vit 2.tif:308: M-20	3603	4542	0.825	0.819	-0.278	-0.288	0.115	-0.0105307
12718	163REP2-UNSEP1.gel-no Vit 1.tif:286: L-22	4438	2559	0.792	0.819	-0.337	-0.287	0.796	0.048363
13023	166-UNSEP1.gel-no Vit 4.tif:255: K-15	3886	4925	0.897	0.819	-0.156	-0.287	1.348	-0.131245
13222	167-UNSEP1.gel-no Vit 3.tif:118: E-22	3042	6004	1.125	0.82	0.17	-0.286	1.469	-0.456229
16998	84-UNSEP1.gel-no Vit 2.tif:198: I-6	1761	4737	0.908	0.82	-0.14	-0.287	1.469	-0.147068
36	110-UNSEP1.gel-no Vit 6.tif:36: B-12	1903	5152	1.008	0.821	0.011	-0.285	0.9	-0.296042
6214	141-UNSEP1.gel-no Vit 6.tif:166: G-22	2401	4730	0.903	0.821	-0.147	-0.285	0.234	-0.137344
7127	144-UNSEP1.gel-no Vit 3.tif:71: C-23	3082	4200	0.802	0.821	-0.318	-0.284	0.17	0.03378
7384	144-UNSEP1.gel-no Vit 3.tif:328: N-16	3795	4201	0.988	0.821	-0.017	-0.284	0.16	-0.267129
12569	163REP2-UNSEP1.gel-no Vit 1.tif:137: F-17	7101	2565	1.267	0.821	0.342	-0.284	1.632	-0.625962
13175	167-UNSEP1.gel-no Vit 3.tif:71: C-23	2287	6012	0.846	0.821	-0.242	-0.285	0.837	-0.0432754
12106	163-UNSEP1.gel-no Vit 1.tif:10: A-10	2739	4665	0.958	0.822	-0.063	-0.283	0.724	-0.220887
12264	163-UNSEP1.gel-no Vit 1.tif:168: G-24	6925	4662	2.421	0.822	1.276	-0.283	0.926	-1.55839	activator
12378	163-UNSEP1.gel-no Vit 1.tif:282: L-18	2556	4665	0.894	0.822	-0.162	-0.283	0.621	-0.121136
12445	163REP2-UNSEP1.gel-no Vit 1.tif:13: A-13	4078	2566	0.728	0.822	-0.459	-0.283	1.1	0.1752
12614	163REP2-UNSEP1.gel-no Vit 1.tif:182: H-14	7692	2568	1.373	0.822	0.457	-0.282	1.054	-0.740121
18140	89-UNSEP1.gel-no Vit 3.tif:332: N-20	2770	3261	0.863	0.822	-0.212	-0.283	-1	-0.0702222
688	113-UNSEP1.gel-no Vit 4.tif:16: A-16	1880	5527	0.975	0.823	-0.037	-0.281	0	-0.24451
7187	144-UNSEP1.gel-no Vit 3.tif:131: F-11	2820	4208	0.734	0.823	-0.446	-0.281	0	0.165112
7266	144-UNSEP1.gel-no Vit 3.tif:210: I-18	2790	4207	0.726	0.823	-0.461	-0.282	0.415	0.180923
7393	145-UNSEP1.gel-no Vit 2.tif:1: A-1	3985	4566	0.912	0.824	-0.133	-0.28	0.17	-0.146389
11828	162-UNSEP1.gel-no Vit 2.tif:68: C-20	3580	3904	1.25	0.824	0.322	-0.28	0.83	-0.601212
12622	163REP2-UNSEP1.gel-no Vit 1.tif:190: H-22	5031	2574	0.898	0.824	-0.156	-0.279	0.951	-0.124071
13079	166-UNSEP1.gel-no Vit 4.tif:311: M-23	3868	4953	0.893	0.824	-0.163	-0.279	1.533	-0.116016
7175	144-UNSEP1.gel-no Vit 3.tif:119: E-23	3539	4221	0.921	0.825	-0.118	-0.277	0.16	-0.158807
11765	162-UNSEP1.gel-no Vit 2.tif:5: A-5	3012	3913	1.051	0.825	0.072	-0.277	0.791	-0.349297
11987	162-UNSEP1.gel-no Vit 2.tif:227: J-11	2763	3910	0.965	0.825	-0.052	-0.278	0.807	-0.226135
12537	163REP2-UNSEP1.gel-no Vit 1.tif:105: E-9	6352	2576	1.134	0.825	0.181	-0.278	0.515	-0.458955
12911	166-UNSEP1.gel-no Vit 4.tif:143: F-23	7502	4956	1.733	0.825	0.793	-0.278	0.807	-1.07081
11875	162-UNSEP1.gel-no Vit 2.tif:115: E-19	2398	3921	0.837	0.827	-0.256	-0.274	0.652	-0.0173403
12435	163REP2-UNSEP1.gel-no Vit 1.tif:3: A-3	5621	2581	1.003	0.827	0.004	-0.275	1.652	-0.278362
12728	163REP2-UNSEP1.gel-no Vit 1.tif:296: M-8	5885	2584	1.05	0.827	0.071	-0.273	0.874	-0.34443
12758	163REP2-UNSEP1.gel-no Vit 1.tif:326: N-14	5398	2582	0.963	0.827	-0.054	-0.274	1	-0.219648
12912	166-UNSEP1.gel-no Vit 4.tif:144: F-24	4539	4972	1.048	0.827	0.068	-0.274	1.771	-0.341679
29	110-UNSEP1.gel-no Vit 6.tif:29: B-5	1825	5197	0.966	0.828	-0.049	-0.272	0.807	-0.222392
772	113-UNSEP1.gel-no Vit 4.tif:100: E-4	2132	5561	1.106	0.828	0.145	-0.272	0.585	-0.417649
12287	163-UNSEP1.gel-no Vit 1.tif:191: H-23	2600	4700	0.909	0.828	-0.138	-0.272	0.415	-0.13465
20813	98-UNSEP1.gel-no Vit 4.tif:317: N-5	2640	2227	0.869	0.828	-0.203	-0.272	-0.737	-0.0697254
4313	126-UNSEP1-noVit-bot.tif:281: L-17	2433	5815	0.868	0.829	-0.205	-0.27	2	-0.0663229
4600	127-UNSEP1-noVit-top.tif:232: J-16	3157	7411	1.13	0.829	0.177	-0.271	0	-0.446879
6237	141-UNSEP1.gel-no Vit 6.tif:189: H-21	2150	4778	0.809	0.829	-0.307	-0.271	0.848	0.0352324
7368	144-UNSEP1.gel-no Vit 3.tif:312: M-24	4018	4242	1.046	0.829	0.065	-0.27	0.263	-0.335439
12186	163-UNSEP1.gel-no Vit 1.tif:90: D-18	3673	4702	1.284	0.829	0.361	-0.271	0.441	-0.631201
11262	160-UNSEP1.gel-no Vit 4.tif:174: H-6	3166	3727	0.882	0.83	-0.181	-0.269	0.193	-0.0876673
12705	163REP2-UNSEP1.gel-no Vit 1.tif:273: L-9	6379	2595	1.138	0.831	0.187	-0.267	1.322	-0.45358
7172	144-UNSEP1.gel-no Vit 3.tif:116: E-20	3358	4256	0.874	0.832	-0.194	-0.265	0.078	-0.0710498
11339	160-UNSEP1.gel-no Vit 4.tif:251: K-11	2965	3735	0.826	0.832	-0.275	-0.266	0.354	0.0104417
12368	163-UNSEP1.gel-no Vit 1.tif:272: L-8	2584	4720	0.903	0.832	-0.147	-0.266	0.305	-0.118142
13327	167-UNSEP1.gel-no Vit 3.tif:223: J-7	2850	6092	1.054	0.832	0.076	-0.265	2.104	-0.341219
18130	89-UNSEP1.gel-no Vit 3.tif:322: N-10	2830	3301	0.882	0.832	-0.181	-0.265	-0.737	-0.0841951
14031	68-UNSEP1.gel-no Vit 4.tif:255: K-15	1791	5383	0.925	0.833	-0.113	-0.263	-0.222	-0.151137
5949	138-UNSEP1.gel-no Vit 1.tif:237: J-21	1920	2865	0.669	0.834	-0.581	-0.262	0.737	0.318041
12661	163REP2-UNSEP1.gel-no Vit 1.tif:229: J-13	6300	2603	1.124	0.834	0.169	-0.263	0.885	-0.430523
13272	167-UNSEP1.gel-no Vit 3.tif:168: G-24	2780	6109	1.028	0.834	0.04	-0.261	1.678	-0.301721
6690	142-UNSEP1.gel-no Vit 5.tif:306: M-18	3696	3566	0.885	0.835	-0.176	-0.259	0	-0.0839013
7725	145-UNSEP1.gel-no Vit 2.tif:333: N-21	3112	4632	0.712	0.835	-0.489	-0.259	0.222	0.229899
10926	159-UNSEP1.gel-no Vit 5.tif:174: H-6	2861	5211	0.907	0.835	-0.142	-0.26	0.75	-0.119326
11702	161-UNSEP1.gel-no Vit 3.tif:278: L-14	2036	2568	0.866	0.835	-0.208	-0.26	2.426	-0.0525908
12555	163REP2-UNSEP1.gel-no Vit 1.tif:123: F-3	3486	2608	0.622	0.835	-0.685	-0.26	2	0.424862
6203	141-UNSEP1.gel-no Vit 6.tif:155: G-11	2578	4820	0.97	0.836	-0.045	-0.258	1	-0.214482
12151	163-UNSEP1.gel-no Vit 1.tif:55: C-7	2813	4745	0.983	0.836	-0.024	-0.258	0.652	-0.233688
7317	144-UNSEP1.gel-no Vit 3.tif:261: K-21	3544	4278	0.923	0.837	-0.116	-0.258	0.222	-0.141103
12615	163REP2-UNSEP1.gel-no Vit 1.tif:183: H-15	4987	2614	0.89	0.837	-0.168	-0.257	0.83	-0.0885777
12863	166-UNSEP1.gel-no Vit 4.tif:95: D-23	3409	5029	0.787	0.837	-0.345	-0.257	0.628	0.088864
18472	91-UNSEP1.gel-no Vit 4.tif:328: N-16	3262	3242	1.02	0.837	0.029	-0.257	3.513	-0.28527
7047	143-UNSEP1.gel-no Vit 4.tif:327: N-15	4018	3115	0.777	0.838	-0.365	-0.256	0.392	0.109036
7891	146-UNSEP1-noVit-top.tif:163: G-19	4688	8183	1.344	0.838	0.426	-0.254	0.193	-0.681511
12255	163-UNSEP1.gel-no Vit 1.tif:159: G-15	3242	4755	1.133	0.838	0.181	-0.255	0.348	-0.435126
12878	166-UNSEP1.gel-no Vit 4.tif:110: E-14	3625	5036	0.837	0.838	-0.256	-0.255	0.667	0.00172262
1907	118-UNSEP1.gel-no Vit 1.tif:227: J-11	1719	5232	0.939	0.839	-0.09	-0.253	0.766	-0.162454
12134	163-UNSEP1.gel-no Vit 1.tif:38: B-14	2967	4763	1.037	0.839	0.053	-0.253	0.766	-0.305673
2452	121-UNSEP1.gel-no Vit 2-1.tif:100: E-4	2372	8147	1.211	0.84	0.276	-0.251	0.926	-0.527738
12112	163-UNSEP1.gel-no Vit 1.tif:16: A-16	5779	4767	2.02	0.84	1.015	-0.251	1.126	-1.26589
2241	120-UNSEP1.gel-no Vit 1.tif:225: J-9	1898	4788	0.972	0.841	-0.041	-0.25	-0.263	-0.208851
13434	167-UNSEP1.gel-no Vit 3.tif:330: N-18	2298	6162	0.85	0.841	-0.235	-0.249	0.585	-0.015357
13436	167-UNSEP1.gel-no Vit 3.tif:332: N-20	4127	6160	1.526	0.841	0.61	-0.249	2.126	-0.859577
2242	120-UNSEP1.gel-no Vit 1.tif:226: J-10	2211	4791	1.132	0.842	0.179	-0.249	0	-0.426982
4429	127-UNSEP1-noVit-top.tif:61: C-13	2815	7528	1.008	0.842	0.011	-0.249	-0.126	-0.259604
7606	145-UNSEP1.gel-no Vit 2.tif:214: I-22	4107	4668	0.94	0.842	-0.089	-0.248	0.469	-0.158841
7625	145-UNSEP1.gel-no Vit 2.tif:233: J-17	3759	4670	0.86	0.842	-0.217	-0.248	0.541	-0.0305164
12540	163REP2-UNSEP1.gel-no Vit 1.tif:108: E-12	5399	2631	0.963	0.843	-0.054	-0.247	0.737	-0.192003
12688	163REP2-UNSEP1.gel-no Vit 1.tif:256: K-16	6794	2632	1.212	0.843	0.278	-0.247	0.926	-0.523785
12381	163-UNSEP1.gel-no Vit 1.tif:285: L-21	4891	4790	1.71	0.844	0.774	-0.244	1.392	-1.01868
12498	163REP2-UNSEP1.gel-no Vit 1.tif:66: C-18	4535	2637	0.809	0.844	-0.305	-0.244	1.263	0.0611033
13244	167-UNSEP1.gel-no Vit 3.tif:140: F-20	2754	6177	1.018	0.844	0.026	-0.245	0.862	-0.270423
2972	122-UNSEP1-noVit-bot.tif:284: L-20	2569	4547	1.047	0.845	0.066	-0.242	1.954	-0.309238
6709	142-UNSEP1.gel-no Vit 5.tif:325: N-13	3059	3608	0.732	0.845	-0.449	-0.243	0.206	0.207108
12426	163-UNSEP1.gel-no Vit 1.tif:330: N-18	2717	4792	0.95	0.845	-0.074	-0.244	0.794	-0.168976
12636	163REP2-UNSEP1.gel-no Vit 1.tif:204: I-12	6707	2639	1.197	0.845	0.259	-0.243	0.893	-0.5024
13952	68-UNSEP1.gel-no Vit 4.tif:176: H-8	2005	5455	1.035	0.845	0.05	-0.244	0.778	-0.292608
13507	168-UNSEP1.gel-no Vit 2.tif:67: C-19	2438	5298	0.978	0.846	-0.032	-0.241	0.17	-0.209177
7212	144-UNSEP1.gel-no Vit 3.tif:156: G-12	2973	4331	0.774	0.847	-0.37	-0.24	0.3	0.130028
7965	146-UNSEP1-noVit-top.tif:237: J-21	3430	8271	0.983	0.847	-0.025	-0.239	0	-0.214829
12682	163REP2-UNSEP1.gel-no Vit 1.tif:250: K-10	7187	2646	1.283	0.847	0.359	-0.239	0.341	-0.599087
7046	143-UNSEP1.gel-no Vit 4.tif:326: N-14	4148	3153	0.802	0.848	-0.319	-0.238	0.07	0.080462
10919	159-UNSEP1.gel-no Vit 5.tif:167: G-23	2566	5291	0.813	0.848	-0.298	-0.238	1.617	0.0608089
11837	162-UNSEP1.gel-no Vit 2.tif:77: D-5	2735	4021	0.955	0.848	-0.067	-0.237	0.348	-0.171436
11723	161-UNSEP1.gel-no Vit 3.tif:299: M-11	2179	2609	0.926	0.849	-0.11	-0.237	1.193	-0.125248
12216	163-UNSEP1.gel-no Vit 1.tif:120: E-24	3094	4818	1.082	0.849	0.113	-0.236	0.399	-0.349864
12723	163REP2-UNSEP1.gel-no Vit 1.tif:291: M-3	6051	2650	1.08	0.849	0.111	-0.237	1.263	-0.347195
13485	168-UNSEP1.gel-no Vit 2.tif:45: B-21	2667	5317	1.07	0.849	0.097	-0.236	0.29	-0.333774
316	110-UNSEP1.gel-no Vit 6.tif:316: N-4	1857	5336	0.983	0.85	-0.024	-0.234	1.059	-0.209729
11158	160-UNSEP1.gel-no Vit 4.tif:70: C-22	4219	3819	1.176	0.85	0.233	-0.234	1	-0.468353
14000	68-UNSEP1.gel-no Vit 4.tif:224: J-8	2295	5491	1.185	0.85	0.245	-0.234	-0.585	-0.479352
14090	68-UNSEP1.gel-no Vit 4.tif:314: N-2	2254	5489	1.164	0.85	0.219	-0.235	-0.222	-0.453556
12132	163-UNSEP1.gel-no Vit 1.tif:36: B-12	3936	4830	1.376	0.851	0.461	-0.232	1	-0.693249
12607	163REP2-UNSEP1.gel-no Vit 1.tif:175: H-7	6532	2657	1.166	0.851	0.221	-0.233	0.716	-0.454337
19988	96-UNSEP1.gel-no Vit 2.tif:164: G-20	3001	3200	1.054	0.851	0.075	-0.233	-0.322	-0.308644
6110	141-UNSEP1.gel-no Vit 6.tif:62: C-14	3624	4912	1.363	0.852	0.447	-0.231	0.415	-0.67786
4838	128-UNSEP1-noVit-bot.tif:134: F-14	2573	6849	0.72	0.853	-0.473	-0.23	0	0.244549
4912	128-UNSEP1-noVit-bot.tif:208: I-16	2642	6855	0.74	0.854	-0.435	-0.228	0.628	0.206711
6284	141-UNSEP1.gel-no Vit 6.tif:236: J-20	2285	4925	0.859	0.854	-0.219	-0.227	0.1	-0.00842206
6310	141-UNSEP1.gel-no Vit 6.tif:262: K-22	2567	4924	0.965	0.854	-0.051	-0.227	0.193	-0.176293
6348	141-UNSEP1.gel-no Vit 6.tif:300: M-12	2229	4924	0.838	0.854	-0.254	-0.227	0.206	0.0272858
7109	144-UNSEP1.gel-no Vit 3.tif:53: C-5	3220	4367	0.838	0.854	-0.254	-0.228	0.415	0.0272858
7524	145-UNSEP1.gel-no Vit 2.tif:132: F-12	3233	4733	0.74	0.854	-0.434	-0.228	0.115	0.206711
11701	161-UNSEP1.gel-no Vit 3.tif:277: L-13	2036	2626	0.866	0.854	-0.208	-0.228	2.684	-0.020131
12605	163REP2-UNSEP1.gel-no Vit 1.tif:173: H-5	6077	2668	1.084	0.854	0.117	-0.227	1.104	-0.344057
12630	163REP2-UNSEP1.gel-no Vit 1.tif:198: I-6	6165	2668	1.1	0.854	0.138	-0.227	1.178	-0.365196
12702	163REP2-UNSEP1.gel-no Vit 1.tif:270: L-6	8554	2668	1.526	0.854	0.61	-0.227	0.737	-0.837447
20143	96-UNSEP1.gel-no Vit 2.tif:319: N-7	2619	3211	0.92	0.854	-0.121	-0.228	-0.263	-0.107398
12328	163-UNSEP1.gel-no Vit 1.tif:232: J-16	2345	4849	0.82	0.855	-0.287	-0.227	0.222	0.0603005
12462	163REP2-UNSEP1.gel-no Vit 1.tif:30: B-6	6518	2670	1.163	0.855	0.218	-0.226	0.459	-0.443855
12562	163REP2-UNSEP1.gel-no Vit 1.tif:130: F-10	7737	2670	1.381	0.855	0.465	-0.226	0.613	-0.691717
6206	141-UNSEP1.gel-no Vit 6.tif:158: G-14	3407	4942	1.281	0.857	0.358	-0.222	0.531	-0.579903
6308	141-UNSEP1.gel-no Vit 6.tif:260: K-20	2205	4938	0.829	0.857	-0.27	-0.223	0.107	0.0479231
7359	144-UNSEP1.gel-no Vit 3.tif:303: M-15	3221	4383	0.839	0.857	-0.254	-0.223	0.1	0.0306244
7288	144-UNSEP1.gel-no Vit 3.tif:232: J-16	3489	4390	0.908	0.858	-0.139	-0.22	0.181	-0.0817146
4778	128-UNSEP1-noVit-bot.tif:74: D-2	4366	6901	1.222	0.859	0.29	-0.219	1.536	-0.508514
7825	146-UNSEP1-noVit-top.tif:97: E-1	4339	8380	1.244	0.859	0.314	-0.22	-0.322	-0.534256
12549	163REP2-UNSEP1.gel-no Vit 1.tif:117: E-21	6016	2681	1.074	0.859	0.102	-0.22	1.237	-0.322264
13152	167-UNSEP1.gel-no Vit 3.tif:48: B-24	2709	6292	1.002	0.859	0.002	-0.219	1.082	-0.222152
4288	126-UNSEP1-noVit-bot.tif:256: K-16	2282	6034	0.814	0.86	-0.297	-0.217	0	0.0793079
6157	141-UNSEP1.gel-no Vit 6.tif:109: E-13	2528	4955	0.951	0.86	-0.073	-0.218	0.087	-0.145109
10860	159-UNSEP1.gel-no Vit 5.tif:108: E-12	3026	5369	0.959	0.86	-0.061	-0.217	0.585	-0.157194
3288	123-UNSEP1-noVit-top.tif:264: K-24	2795	6330	0.962	0.861	-0.056	-0.215	2.115	-0.160024
11791	162-UNSEP1.gel-no Vit 2.tif:31: B-7	3106	4080	1.084	0.861	0.117	-0.216	1.585	-0.33228
13224	167-UNSEP1.gel-no Vit 3.tif:120: E-24	2778	6308	1.027	0.861	0.039	-0.215	1.555	-0.254351
4551	127-UNSEP1-noVit-top.tif:183: H-15	2804	7706	1.004	0.862	0.006	-0.215	0	-0.219999
13558	168-UNSEP1.gel-no Vit 2.tif:118: E-22	2300	5396	0.923	0.862	-0.116	-0.214	0.459	-0.0986428
12876	166-UNSEP1.gel-no Vit 4.tif:108: E-12	6979	5184	1.612	0.863	0.689	-0.213	1.17	-0.901419
19154	94-UNSEP1.gel-no Vit 1.tif:2: A-2	1563	5039	0.808	0.863	-0.308	-0.212	0.644	0.0950053
616	111-UNSEP1.gel-no Vit 5.tif:280: L-16	1696	4458	0.884	0.864	-0.177	-0.211	1.158	-0.0330151
10814	159-UNSEP1.gel-no Vit 5.tif:62: C-14	2441	5393	0.773	0.864	-0.371	-0.21	0.322	0.160563
11389	160-UNSEP1.gel-no Vit 4.tif:301: M-13	3362	3878	0.937	0.864	-0.094	-0.212	0.547	-0.117018
12152	163-UNSEP1.gel-no Vit 1.tif:56: C-8	2714	4903	0.949	0.864	-0.076	-0.211	0.819	-0.135377
12354	163-UNSEP1.gel-no Vit 1.tif:258: K-18	4220	4900	1.475	0.864	0.561	-0.212	1.441	-0.771612
13504	168-UNSEP1.gel-no Vit 2.tif:64: C-16	2351	5412	0.943	0.864	-0.085	-0.21	0.441	-0.126226
5603	130-UNSEP1-noVit-bot.tif:227: J-11	2932	7301	0.813	0.865	-0.298	-0.21	0.617	0.0894448
7456	145-UNSEP1.gel-no Vit 2.tif:64: C-16	4144	4797	0.949	0.865	-0.076	-0.209	0.692	-0.133708
11870	162-UNSEP1.gel-no Vit 2.tif:110: E-14	4242	4100	1.481	0.865	0.566	-0.209	0.778	-0.7758
12303	163-UNSEP1.gel-no Vit 1.tif:207: I-15	3299	4910	1.153	0.865	0.206	-0.209	0.652	-0.41462
12759	163REP2-UNSEP1.gel-no Vit 1.tif:327: N-15	6386	2701	1.14	0.865	0.188	-0.209	0.441	-0.398262
3011	122-UNSEP1-noVit-bot.tif:323: N-11	2154	4658	0.878	0.866	-0.189	-0.207	0.222	-0.0198539
4743	128-UNSEP1-noVit-bot.tif:39: B-15	3807	6952	1.066	0.866	0.092	-0.208	0.222	-0.299769
12192	163-UNSEP1.gel-no Vit 1.tif:96: D-24	3105	4913	1.086	0.866	0.118	-0.208	0.184	-0.326585
17113	84-UNSEP1.gel-no Vit 2.tif:313: N-1	2588	5002	1.334	0.866	0.416	-0.208	1.73	-0.62332
2438	121-UNSEP1.gel-no Vit 2-1.tif:86: D-14	2296	8408	1.172	0.867	0.229	-0.206	0.933	-0.434869
6082	141-UNSEP1.gel-no Vit 6.tif:34: B-10	3164	4999	1.19	0.867	0.251	-0.206	1.469	-0.456858
12735	163REP2-UNSEP1.gel-no Vit 1.tif:303: M-15	8557	2708	1.527	0.867	0.611	-0.206	0.363	-0.816596
13444	168-UNSEP1.gel-no Vit 2.tif:4: A-4	2674	5429	1.073	0.867	0.101	-0.206	0.559	-0.307546
13502	168-UNSEP1.gel-no Vit 2.tif:62: C-14	2293	5430	0.92	0.867	-0.121	-0.205	0.469	-0.0856019
17580	88-UNSEP1.gel-no Vit 2-1.tif:108: E-12	2276	4189	0.872	0.867	-0.198	-0.206	-0.193	-0.00829614
19254	94-UNSEP1.gel-no Vit 1.tif:102: E-6	1431	5063	0.74	0.867	-0.435	-0.205	0.959	0.228507
949	113-UNSEP1.gel-no Vit 4.tif:277: L-13	1967	5826	1.02	0.868	0.029	-0.205	1.907	-0.232802
7722	145-UNSEP1.gel-no Vit 2.tif:330: N-18	5097	4812	1.167	0.868	0.222	-0.204	0.957	-0.427038
12729	163REP2-UNSEP1.gel-no Vit 1.tif:297: M-9	4980	2712	0.889	0.868	-0.17	-0.203	1.322	-0.0344884
1804	118-UNSEP1.gel-no Vit 1.tif:124: F-4	1785	5422	0.975	0.869	-0.036	-0.202	1.206	-0.166046
1943	118-UNSEP1.gel-no Vit 1.tif:263: K-23	1720	5420	0.94	0.869	-0.089	-0.202	1.755	-0.113305
12506	163REP2-UNSEP1.gel-no Vit 1.tif:74: D-2	5018	2713	0.895	0.869	-0.159	-0.203	1.293	-0.0425315
13483	168-UNSEP1.gel-no Vit 2.tif:43: B-19	2354	5443	0.944	0.869	-0.083	-0.202	1	-0.119431
19131	93-UNSEP1.gel-no Vit 6.tif:315: N-3	2832	2504	1.036	0.869	0.051	-0.203	0.138	-0.253596
4432	127-UNSEP1-noVit-top.tif:64: C-16	2939	7783	1.052	0.87	0.074	-0.2	0.807	-0.274047
12323	163-UNSEP1.gel-no Vit 1.tif:227: J-11	4183	4936	1.462	0.87	0.548	-0.201	1.138	-0.748856
12570	163REP2-UNSEP1.gel-no Vit 1.tif:138: F-18	5852	2718	1.044	0.87	0.063	-0.2	1.585	-0.263034
13187	167-UNSEP1.gel-no Vit 3.tif:83: D-11	2691	6371	0.995	0.87	-0.007	-0.201	1.71	-0.193681
16095	79-UNSEP1.gel-no Vit 5.tif:303: M-15	2436	3603	1.054	0.87	0.076	-0.202	0	-0.276788
16713	81-UNSEP1.gel-no Vit 3.tif:249: K-9	3131	3658	1.57	0.87	0.651	-0.201	0	-0.851677
10846	159-UNSEP1.gel-no Vit 5.tif:94: D-22	2559	5436	0.811	0.871	-0.302	-0.199	0.652	0.102971
10913	159-UNSEP1.gel-no Vit 5.tif:161: G-17	2333	5444	0.739	0.872	-0.436	-0.197	2.17	0.238754
12709	163REP2-UNSEP1.gel-no Vit 1.tif:277: L-13	7461	2722	1.331	0.872	0.413	-0.198	0.503	-0.610111
13512	168-UNSEP1.gel-no Vit 2.tif:72: C-24	2606	5460	1.045	0.872	0.064	-0.197	1.12	-0.261103
7464	145-UNSEP1.gel-no Vit 2.tif:72: C-24	4960	4842	1.135	0.873	0.183	-0.195	0.107	-0.378639
12405	163-UNSEP1.gel-no Vit 1.tif:309: M-21	2701	4952	0.944	0.873	-0.083	-0.196	0.234	-0.112805
13366	167-UNSEP1.gel-no Vit 3.tif:262: K-22	3083	6393	1.14	0.873	0.189	-0.196	0.874	-0.38498
7460	145-UNSEP1.gel-no Vit 2.tif:68: C-20	3827	4848	0.876	0.874	-0.191	-0.194	0.222	-0.00329759
6475	142-UNSEP1.gel-no Vit 5.tif:91: D-19	2930	3736	0.702	0.875	-0.511	-0.192	0.84	0.317812
6957	143-UNSEP1.gel-no Vit 4.tif:237: J-21	3745	3253	0.724	0.875	-0.466	-0.193	0.585	0.273293
7487	145-UNSEP1.gel-no Vit 2.tif:95: D-23	5474	4849	1.253	0.875	0.325	-0.193	0.222	-0.518031
13024	166-UNSEP1.gel-no Vit 4.tif:256: K-16	5623	5256	1.299	0.875	0.377	-0.193	1.848	-0.570047
13975	68-UNSEP1.gel-no Vit 4.tif:199: I-7	2432	5652	1.256	0.875	0.329	-0.193	-0.322	-0.521482
4824	128-UNSEP1-noVit-bot.tif:120: E-24	2966	7036	0.83	0.876	-0.268	-0.191	1.07	0.0778195
12741	163REP2-UNSEP1.gel-no Vit 1.tif:309: M-21	5018	2737	0.895	0.876	-0.159	-0.19	0.585	-0.0309568
14070	68-UNSEP1.gel-no Vit 4.tif:294: M-6	1944	5656	1.004	0.876	0.006	-0.192	-0.222	-0.196756
11063	159-UNSEP1.gel-no Vit 5.tif:311: M-23	3021	5472	0.957	0.877	-0.063	-0.189	0.918	-0.125942
11747	161-UNSEP1.gel-no Vit 3.tif:323: N-11	2041	2698	0.868	0.877	-0.205	-0.189	1.854	0.0148818
7645	145-UNSEP1.gel-no Vit 2.tif:253: K-13	3520	4865	0.806	0.878	-0.312	-0.188	0.107	0.123441
13840	68-UNSEP1.gel-no Vit 4.tif:64: C-16	1716	5672	0.886	0.878	-0.174	-0.188	0.737	-0.0130858
13994	68-UNSEP1.gel-no Vit 4.tif:218: J-2	1827	5669	0.944	0.878	-0.084	-0.188	-0.222	-0.104566
15340	77-UNSEP.gel-with Vit 1.tif:220: J-4	3337	1741	0.969	0.878	-0.046	-0.187	0.515	-0.142276
15446	77-UNSEP.gel-with Vit 1.tif:326: N-14	3181	1741	0.923	0.878	-0.115	-0.187	0.138	-0.0721097
6168	141-UNSEP1.gel-no Vit 6.tif:120: E-24	2490	5065	0.936	0.879	-0.095	-0.187	0.241	-0.0906454
11896	162-UNSEP1.gel-no Vit 2.tif:136: F-16	2160	4165	0.754	0.879	-0.407	-0.187	1.322	0.221299
12692	163REP2-UNSEP1.gel-no Vit 1.tif:260: K-20	7119	2746	1.27	0.879	0.345	-0.185	1.17	-0.530893
7054	143-UNSEP1.gel-no Vit 4.tif:334: N-22	6111	3273	1.181	0.88	0.24	-0.184	0.399	-0.424434
7533	145-UNSEP1.gel-no Vit 2.tif:141: F-21	3761	4877	0.861	0.88	-0.216	-0.185	0.322	0.0314903
7935	146-UNSEP1-noVit-top.tif:207: I-15	3391	8591	0.972	0.88	-0.041	-0.184	-0.17	-0.143453
12458	163REP2-UNSEP1.gel-no Vit 1.tif:26: B-2	5734	2748	1.023	0.88	0.033	-0.184	0.784	-0.217231
13477	168-UNSEP1.gel-no Vit 2.tif:37: B-13	2558	5509	1.026	0.88	0.037	-0.185	1.833	-0.221455
7482	145-UNSEP1.gel-no Vit 2.tif:90: D-18	3729	4886	0.854	0.881	-0.228	-0.182	0.885	0.0449059
12950	166-UNSEP1.gel-no Vit 4.tif:182: H-14	3654	5293	0.844	0.881	-0.245	-0.183	1.202	0.061899
19756	95-UNSEP1.gel-no Vit 1.tif:268: L-4	2077	2488	0.972	0.881	-0.041	-0.183	2.891	-0.141814
12383	163-UNSEP1.gel-no Vit 1.tif:287: L-23	2506	5007	0.876	0.882	-0.191	-0.18	0.441	0.00984779
12949	166-UNSEP1.gel-no Vit 4.tif:181: H-13	6961	5301	1.608	0.882	0.685	-0.181	0.778	-0.866417
13988	68-UNSEP1.gel-no Vit 4.tif:212: I-20	2073	5697	1.071	0.882	0.098	-0.181	-0.485	-0.280108
5204	129-UNSEP1-noVit-top.tif:164: G-20	3207	8665	0.941	0.883	-0.088	-0.18	1.303	-0.0917813
5136	129-UNSEP1-noVit-top.tif:96: D-24	2843	8676	0.834	0.884	-0.262	-0.178	0.556	0.083999
6094	141-UNSEP1.gel-no Vit 6.tif:46: B-22	2736	5093	1.029	0.884	0.041	-0.179	0.181	-0.219125
7677	145-UNSEP1.gel-no Vit 2.tif:285: L-21	4364	4903	0.999	0.884	-0.002	-0.177	0.193	-0.176438
11802	162-UNSEP1.gel-no Vit 2.tif:42: B-18	3050	4191	1.065	0.884	0.09	-0.178	0.722	-0.268735
11871	162-UNSEP1.gel-no Vit 2.tif:111: E-15	2602	4191	0.908	0.884	-0.139	-0.178	1.519	-0.0386459
13829	68-UNSEP1.gel-no Vit 4.tif:53: C-5	1957	5707	1.011	0.884	0.015	-0.179	0.497	-0.193665
2381	121-UNSEP1.gel-no Vit 2-1.tif:29: B-5	2162	8585	1.103	0.885	0.142	-0.176	0.485	-0.317683
4193	126-UNSEP1-noVit-bot.tif:161: G-17	2371	6208	0.846	0.885	-0.242	-0.176	0.907	0.0650198
4506	127-UNSEP1-noVit-top.tif:138: F-18	2564	7917	0.918	0.885	-0.123	-0.176	0.83	-0.0528167
14069	68-UNSEP1.gel-no Vit 4.tif:293: M-5	2010	5716	1.038	0.885	0.054	-0.176	0	-0.230057
15381	77-UNSEP.gel-with Vit 1.tif:261: K-21	3618	1754	1.05	0.885	0.071	-0.176	0	-0.24664
973	113-UNSEP1.gel-no Vit 4.tif:301: M-13	2514	5949	1.304	0.886	0.383	-0.174	1.344	-0.557565
6965	143-UNSEP1.gel-no Vit 4.tif:245: K-5	3852	3296	0.745	0.886	-0.425	-0.174	1	0.250066
7454	145-UNSEP1.gel-no Vit 2.tif:62: C-14	3721	4911	0.852	0.886	-0.231	-0.175	0.322	0.0564533
13865	68-UNSEP1.gel-no Vit 4.tif:89: D-17	1839	5726	0.95	0.886	-0.074	-0.174	0.837	-0.100621
19484	94-UNSEP1.gel-no Vit 1.tif:332: N-20	2262	5172	1.169	0.886	0.226	-0.174	0	-0.399896
2238	120-UNSEP1.gel-no Vit 1.tif:222: J-6	1826	5050	0.935	0.887	-0.097	-0.173	0.322	-0.0760323
7126	144-UNSEP1.gel-no Vit 3.tif:70: C-22	3741	4537	0.974	0.887	-0.038	-0.173	0.093	-0.134988
11893	162-UNSEP1.gel-no Vit 2.tif:133: F-13	2614	4204	0.913	0.887	-0.132	-0.173	1.147	-0.0416808
14067	68-UNSEP1.gel-no Vit 4.tif:291: M-3	1689	5728	0.872	0.887	-0.197	-0.173	0	0.024606
12017	162-UNSEP1.gel-no Vit 2.tif:257: K-17	2345	4209	0.819	0.888	-0.289	-0.171	0	0.116696
12576	163REP2-UNSEP1.gel-no Vit 1.tif:144: F-24	5752	2773	1.026	0.888	0.038	-0.171	1.241	-0.208399
12285	163-UNSEP1.gel-no Vit 1.tif:189: H-21	2742	5045	0.959	0.889	-0.061	-0.17	0.469	-0.109347
12376	163-UNSEP1.gel-no Vit 1.tif:280: L-16	2488	5042	0.87	0.889	-0.201	-0.17	0.469	0.031168
6288	141-UNSEP1.gel-no Vit 6.tif:240: J-24	2791	5133	1.05	0.89	0.07	-0.167	0.082	-0.238512
12056	162-UNSEP1.gel-no Vit 2.tif:296: M-8	2339	4219	0.817	0.89	-0.292	-0.168	0.16	0.123469
16457	80-UNSEP1.gel-no Vit 4.tif:329: N-17	1792	4882	0.866	0.89	-0.208	-0.168	0	0.0394383
2267	120-UNSEP1.gel-no Vit 1.tif:251: K-11	2322	5079	1.189	0.892	0.25	-0.165	0.17	-0.414633
4024	125-UNSEP1-noVit-top.tif:328: N-16	3662	7179	0.999	0.892	-0.0009846	-0.165	1.678	-0.163441
7426	145-UNSEP1.gel-no Vit 2.tif:34: B-10	4161	4948	0.952	0.892	-0.07	-0.164	0.585	-0.0939179
9857	156-UNSEP1.gel-no Vit 3.tif:113: E-17	1386	1367	0.838	0.892	-0.255	-0.166	1	0.0900935
10883	159-UNSEP1.gel-no Vit 5.tif:131: F-11	2520	5566	0.799	0.892	-0.325	-0.165	0.485	0.158848
12672	163REP2-UNSEP1.gel-no Vit 1.tif:240: J-24	5089	2785	0.908	0.892	-0.139	-0.165	1.222	-0.0256486
14017	68-UNSEP1.gel-no Vit 4.tif:241: K-1	1831	5763	0.946	0.892	-0.081	-0.165	-0.193	-0.0847965
19977	96-UNSEP1.gel-no Vit 2.tif:153: G-9	2664	3353	0.935	0.892	-0.096	-0.165	1	-0.0679227
1227	114-UNSEP1.gel-no Vit 3.tif:219: J-3	1775	5235	0.987	0.893	-0.018	-0.164	0.181	-0.14439
1551	116-UNSEP1.gel-no Vit 2-1.tif:207: I-15	1997	6414	1.045	0.893	0.063	-0.164	0.837	-0.226771
3043	123-UNSEP1-noVit-top.tif:19: A-19	3244	6565	1.116	0.893	0.159	-0.163	1.885	-0.321605
5027	128-UNSEP1-noVit-bot.tif:323: N-11	3018	7174	0.845	0.893	-0.243	-0.163	1.042	0.0797088
7702	145-UNSEP1.gel-no Vit 2.tif:310: M-22	4055	4953	0.928	0.893	-0.107	-0.163	0.107	-0.0554646
10871	159-UNSEP1.gel-no Vit 5.tif:119: E-23	2657	5575	0.842	0.893	-0.248	-0.163	0.585	0.0848399
12359	163-UNSEP1.gel-no Vit 1.tif:263: K-23	2657	5065	0.929	0.893	-0.106	-0.164	0.29	-0.0570184
12763	163REP2-UNSEP1.gel-no Vit 1.tif:331: N-19	5749	2788	1.026	0.893	0.037	-0.164	0.515	-0.200299
12937	166-UNSEP1.gel-no Vit 4.tif:169: H-1	4009	5369	0.926	0.893	-0.111	-0.163	0.515	-0.052352
13986	68-UNSEP1.gel-no Vit 4.tif:210: I-18	1955	5768	1.01	0.893	0.014	-0.163	-0.222	-0.177623
15453	77-UNSEP.gel-with Vit 1.tif:333: N-21	3840	1769	1.115	0.893	0.156	-0.164	0.193	-0.320312
2129	120-UNSEP1.gel-no Vit 1.tif:113: E-17	1759	5088	0.901	0.894	-0.151	-0.162	0	-0.0112523
2600	121-UNSEP1.gel-no Vit 2-1.tif:248: K-8	2014	8670	1.028	0.894	0.04	-0.161	1.138	-0.201494
5316	129-UNSEP1-noVit-top.tif:276: L-12	2960	8774	0.868	0.894	-0.204	-0.162	0.415	0.0425798
3384	124-UNSEP1-noVit-bot.tif:24: A-24	3669	4573	1.001	0.895	0.0008522	-0.16	2.371	-0.161482
4231	126-UNSEP1-noVit-bot.tif:199: I-7	2476	6276	0.883	0.895	-0.179	-0.16	0	0.0194742
5089	129-UNSEP1-noVit-top.tif:49: C-1	4436	8782	1.301	0.895	0.38	-0.16	0.819	-0.539661
7429	145-UNSEP1.gel-no Vit 2.tif:37: B-13	3946	4964	0.903	0.895	-0.147	-0.159	0.093	-0.0128383
11039	159-UNSEP1.gel-no Vit 5.tif:287: L-23	2917	5583	0.924	0.895	-0.114	-0.161	1	-0.0460052
13338	167-UNSEP1.gel-no Vit 3.tif:234: J-18	3020	6555	1.117	0.895	0.159	-0.16	1.541	-0.31967
4174	126-UNSEP1-noVit-bot.tif:142: F-22	1946	6282	0.694	0.896	-0.527	-0.159	1	0.368563
7333	144-UNSEP1.gel-no Vit 3.tif:277: L-13	3731	4582	0.971	0.896	-0.042	-0.158	0.078	-0.115973
7900	146-UNSEP1-noVit-top.tif:172: H-4	2992	8748	0.857	0.896	-0.222	-0.158	0.126	0.0642035
10881	159-UNSEP1.gel-no Vit 5.tif:129: F-9	2562	5591	0.812	0.896	-0.301	-0.158	0.628	0.142019
11031	159-UNSEP1.gel-no Vit 5.tif:279: L-15	2692	5593	0.853	0.896	-0.229	-0.158	2.585	0.070953
11301	160-UNSEP1.gel-no Vit 4.tif:213: I-21	6308	4024	1.758	0.896	0.814	-0.158	1.485	-0.972364
1208	114-UNSEP1.gel-no Vit 3.tif:200: I-8	1942	5259	1.08	0.897	0.111	-0.157	0.862	-0.267851
1963	118-UNSEP1.gel-no Vit 1.tif:283: L-19	1641	5592	0.897	0.897	-0.157	-0.157	0.737	0
6226	141-UNSEP1.gel-no Vit 6.tif:178: H-10	2734	5169	1.028	0.897	0.04	-0.157	1.628	-0.19666
11758	161-UNSEP1.gel-no Vit 3.tif:334: N-22	2678	2758	1.138	0.897	0.187	-0.157	1.387	-0.343321
12170	163-UNSEP1.gel-no Vit 1.tif:74: D-2	3373	5092	1.179	0.897	0.238	-0.156	1.626	-0.394384
12379	163-UNSEP1.gel-no Vit 1.tif:283: L-19	2478	5092	0.866	0.897	-0.207	-0.156	0.263	0.050741
14029	68-UNSEP1.gel-no Vit 4.tif:253: K-13	2018	5795	1.042	0.897	0.06	-0.157	-0.585	-0.216175
6573	142-UNSEP1.gel-no Vit 5.tif:189: H-21	2472	3834	0.592	0.898	-0.757	-0.155	0	0.601118
7199	144-UNSEP1.gel-no Vit 3.tif:143: F-23	3686	4593	0.96	0.898	-0.059	-0.155	0.7	-0.096319
7535	145-UNSEP1.gel-no Vit 2.tif:143: F-23	3792	4976	0.868	0.898	-0.204	-0.156	0.126	0.0490204
12731	163REP2-UNSEP1.gel-no Vit 1.tif:299: M-11	7094	2805	1.266	0.898	0.34	-0.155	0.7	-0.49549
13450	168-UNSEP1.gel-no Vit 2.tif:10: A-10	2865	5625	1.149	0.898	0.201	-0.154	1.244	-0.355591
296	110-UNSEP1.gel-no Vit 6.tif:296: M-8	1840	5643	0.974	0.899	-0.038	-0.153	0.485	-0.115601
12956	166-UNSEP1.gel-no Vit 4.tif:188: H-20	3893	5402	0.899	0.899	-0.154	-0.154	1.27	0
13005	166-UNSEP1.gel-no Vit 4.tif:237: J-21	3648	5403	0.842	0.899	-0.247	-0.154	0.807	0.0945009
97	110-UNSEP1.gel-no Vit 6.tif:97: E-1	1787	5649	0.946	0.9	-0.08	-0.152	0.222	-0.0719152
7536	145-UNSEP1.gel-no Vit 2.tif:144: F-24	4440	4992	1.016	0.9	0.023	-0.151	0.115	-0.174903
7951	146-UNSEP1-noVit-top.tif:223: J-7	3367	8783	0.965	0.9	-0.051	-0.152	0	-0.100604
12180	163-UNSEP1.gel-no Vit 1.tif:84: D-12	2575	5105	0.9	0.9	-0.152	-0.152	0.322	0
12604	163REP2-UNSEP1.gel-no Vit 1.tif:172: H-4	6766	2810	1.207	0.9	0.272	-0.152	1	-0.423429
15435	77-UNSEP.gel-with Vit 1.tif:315: N-3	3643	1784	1.057	0.9	0.081	-0.152	0.222	-0.231978
18011	89-UNSEP1.gel-no Vit 3.tif:203: I-11	3438	3571	1.072	0.9	0.1	-0.152	0.678	-0.252308
1810	118-UNSEP1.gel-no Vit 1.tif:130: F-10	1878	5619	1.026	0.901	0.037	-0.15	0	-0.187432
7219	144-UNSEP1.gel-no Vit 3.tif:163: G-19	2770	4607	0.721	0.901	-0.472	-0.151	0.093	0.321528
12360	163-UNSEP1.gel-no Vit 1.tif:264: K-24	3496	5115	1.222	0.901	0.29	-0.15	0.788	-0.439645
15448	77-UNSEP.gel-with Vit 1.tif:328: N-16	3949	1785	1.146	0.901	0.197	-0.151	0.415	-0.347008
6164	141-UNSEP1.gel-no Vit 6.tif:116: E-20	3219	5202	1.211	0.902	0.276	-0.148	1.064	-0.425
8256	150-UNSEP1.gel-no Vit 1.tif:192: H-24	2010	1415	1.149	0.902	0.201	-0.149	2.087	-0.349179
12564	163REP2-UNSEP1.gel-no Vit 1.tif:132: F-12	7956	2818	1.42	0.902	0.506	-0.148	0.7	-0.654692
13344	167-UNSEP1.gel-no Vit 3.tif:240: J-24	2157	6607	0.798	0.902	-0.326	-0.148	0.28	0.176739
4587	127-UNSEP1-noVit-top.tif:219: J-3	2969	8074	1.063	0.903	0.088	-0.148	0.933	-0.235344
12138	163-UNSEP1.gel-no Vit 1.tif:42: B-18	4373	5124	1.529	0.903	0.612	-0.147	1.184	-0.759791
12897	166-UNSEP1.gel-no Vit 4.tif:129: F-9	3779	5430	0.873	0.903	-0.196	-0.146	1.305	0.0487443
13559	168-UNSEP1.gel-no Vit 2.tif:119: E-23	2564	5656	1.029	0.903	0.041	-0.147	0.193	-0.188445
17725	88-UNSEP1.gel-no Vit 2-1.tif:253: K-13	2796	4365	1.071	0.903	0.099	-0.147	1.193	-0.246161
12279	163-UNSEP1.gel-no Vit 1.tif:183: H-15	2774	5127	0.97	0.904	-0.044	-0.146	0.585	-0.101662
7423	145-UNSEP1.gel-no Vit 2.tif:31: B-7	3966	5016	0.908	0.905	-0.139	-0.144	0.087	-0.00477451
7627	145-UNSEP1.gel-no Vit 2.tif:235: J-19	3921	5017	0.898	0.905	-0.156	-0.144	0.222	0.0112023
13416	167-UNSEP1.gel-no Vit 3.tif:312: M-24	2430	6625	0.899	0.905	-0.154	-0.144	0.755	0.00959668
2946	122-UNSEP1-noVit-bot.tif:258: K-18	1972	4873	0.803	0.906	-0.316	-0.142	0.363	0.174111
3080	123-UNSEP1-noVit-top.tif:56: C-8	2197	6656	0.756	0.906	-0.403	-0.143	1.379	0.261125
6152	141-UNSEP1.gel-no Vit 6.tif:104: E-8	2606	5222	0.98	0.906	-0.029	-0.143	0.115	-0.113271
11850	162-UNSEP1.gel-no Vit 2.tif:90: D-18	3201	4295	1.117	0.906	0.16	-0.142	0.308	-0.302046
12579	163REP2-UNSEP1.gel-no Vit 1.tif:147: G-3	6929	2828	1.236	0.906	0.306	-0.143	0.951	-0.448096
12730	163REP2-UNSEP1.gel-no Vit 1.tif:298: M-10	6133	2830	1.094	0.906	0.13	-0.142	1.087	-0.27203
13541	168-UNSEP1.gel-no Vit 2.tif:101: E-5	2469	5675	0.99	0.906	-0.014	-0.142	1.147	-0.127917
16120	79-UNSEP1.gel-no Vit 5.tif:328: N-16	2528	3754	1.094	0.906	0.13	-0.142	0	-0.27203
13144	167-UNSEP1.gel-no Vit 3.tif:40: B-16	2867	6641	1.06	0.907	0.084	-0.141	1.624	-0.22489
5009	128-UNSEP1-noVit-bot.tif:305: M-17	2743	7289	0.768	0.908	-0.381	-0.14	0.115	0.241586
13519	168-UNSEP1.gel-no Vit 2.tif:79: D-7	2423	5686	0.972	0.908	-0.041	-0.139	1.322	-0.098264
4666	127-UNSEP1-noVit-top.tif:298: M-10	3067	8131	1.098	0.909	0.135	-0.137	-0.322	-0.272526
7123	144-UNSEP1.gel-no Vit 3.tif:67: C-19	3532	4649	0.92	0.909	-0.121	-0.138	0.212	-0.0173536
11266	160-UNSEP1.gel-no Vit 4.tif:178: H-10	3547	4083	0.988	0.909	-0.017	-0.137	0.3	-0.120231
12428	163-UNSEP1.gel-no Vit 1.tif:332: N-20	2588	5156	0.905	0.909	-0.144	-0.138	0.248	0.0063625
20359	97-UNSEP1.gel-no Vit 3.tif:199: I-7	3021	3262	0.929	0.909	-0.106	-0.138	0	-0.0313983
3185	123-UNSEP1-noVit-top.tif:161: G-17	2698	6691	0.928	0.91	-0.107	-0.135	0.907	-0.0282583
4563	127-UNSEP1-noVit-top.tif:195: I-3	2935	8135	1.051	0.91	0.072	-0.137	0.659	-0.207824
4970	128-UNSEP1-noVit-bot.tif:266: L-2	3445	7311	0.965	0.91	-0.052	-0.136	0.193	-0.0846624
4979	128-UNSEP1-noVit-bot.tif:275: L-11	2812	7310	0.787	0.91	-0.345	-0.136	0.222	0.209503
7924	146-UNSEP1-noVit-top.tif:196: I-4	2986	8886	0.856	0.91	-0.225	-0.135	1.485	0.0882557
10864	159-UNSEP1.gel-no Vit 5.tif:112: E-16	2339	5679	0.741	0.91	-0.432	-0.136	0.926	0.296393
11146	160-UNSEP1.gel-no Vit 4.tif:58: C-10	4619	4084	1.287	0.91	0.364	-0.137	1.367	-0.500074
12340	163-UNSEP1.gel-no Vit 1.tif:244: K-4	2746	5164	0.96	0.91	-0.059	-0.136	0.263	-0.0771679
12719	163REP2-UNSEP1.gel-no Vit 1.tif:287: L-23	5164	2841	0.922	0.91	-0.118	-0.136	1.348	-0.0189002
13386	167-UNSEP1.gel-no Vit 3.tif:282: L-18	3278	6666	1.212	0.91	0.277	-0.136	1.75	-0.413451
13511	168-UNSEP1.gel-no Vit 2.tif:71: C-23	2466	5697	0.989	0.91	-0.016	-0.136	0.515	-0.120104
4336	126-UNSEP1-noVit-bot.tif:304: M-16	2259	6387	0.806	0.911	-0.312	-0.135	1.495	0.176671
11662	161-UNSEP1.gel-no Vit 3.tif:238: J-22	3296	2800	1.401	0.911	0.487	-0.135	1.585	-0.620934
12580	163REP2-UNSEP1.gel-no Vit 1.tif:148: G-4	5876	2844	1.049	0.911	0.068	-0.135	1.807	-0.203492
4545	127-UNSEP1-noVit-top.tif:177: H-9	2852	8152	1.021	0.912	0.03	-0.134	0.193	-0.162877
7412	145-UNSEP1.gel-no Vit 2.tif:20: A-20	3763	5054	0.861	0.912	-0.215	-0.134	0.193	0.0830206
10867	159-UNSEP1.gel-no Vit 5.tif:115: E-19	2567	5694	0.813	0.912	-0.298	-0.132	1.051	0.165778
13482	168-UNSEP1.gel-no Vit 2.tif:42: B-18	2306	5711	0.925	0.912	-0.112	-0.133	0.363	-0.0204195
3224	123-UNSEP1-noVit-top.tif:200: I-8	2313	6713	0.796	0.913	-0.329	-0.131	0.637	0.197846
6357	141-UNSEP1.gel-no Vit 6.tif:309: M-21	2386	5271	0.897	0.914	-0.156	-0.129	0.093	0.0270862
13855	68-UNSEP1.gel-no Vit 4.tif:79: D-7	1998	5901	1.032	0.914	0.045	-0.13	1.1	-0.175177
4558	127-UNSEP1-noVit-top.tif:190: H-22	3219	8184	1.153	0.915	0.205	-0.128	1.716	-0.333549
7510	145-UNSEP1.gel-no Vit 2.tif:118: E-22	4417	5074	1.011	0.915	0.016	-0.128	0.093	-0.143939
12358	163-UNSEP1.gel-no Vit 1.tif:262: K-22	3075	5192	1.075	0.915	0.104	-0.128	0.837	-0.232493
12473	163REP2-UNSEP1.gel-no Vit 1.tif:41: B-17	5575	2856	0.995	0.915	-0.007	-0.129	1.858	-0.120925
12894	166-UNSEP1.gel-no Vit 4.tif:126: F-6	4421	5501	1.021	0.915	0.03	-0.128	1.943	-0.158139
13993	68-UNSEP1.gel-no Vit 4.tif:217: J-1	2162	5913	1.117	0.915	0.159	-0.127	0.469	-0.287786
13959	68-UNSEP1.gel-no Vit 4.tif:183: H-15	1994	5916	1.03	0.916	0.042	-0.127	-0.485	-0.169225
15423	77-UNSEP.gel-with Vit 1.tif:303: M-15	5017	1815	1.456	0.916	0.542	-0.127	0.628	-0.668591
16425	80-UNSEP1.gel-no Vit 4.tif:297: M-9	2205	5027	1.065	0.916	0.091	-0.126	0.193	-0.217434
20119	96-UNSEP1.gel-no Vit 2.tif:295: M-7	2786	3444	0.978	0.916	-0.032	-0.127	-0.322	-0.0944869
6935	143-UNSEP1.gel-no Vit 4.tif:215: I-23	4998	3411	0.966	0.917	-0.05	-0.125	0.556	-0.0751015
7624	145-UNSEP1.gel-no Vit 2.tif:232: J-16	3602	5084	0.825	0.917	-0.278	-0.125	0.387	0.152528
8946	152-UNSEP1.gel-no Vit 3.tif:210: I-18	1507	1687	1.013	0.917	0.019	-0.125	-0.115	-0.143641
12693	163REP2-UNSEP1.gel-no Vit 1.tif:261: K-21	5400	2865	0.964	0.917	-0.053	-0.124	0.524	-0.0721114
13529	168-UNSEP1.gel-no Vit 2.tif:89: D-17	2449	5739	0.982	0.917	-0.026	-0.125	0.415	-0.0988013
15339	77-UNSEP.gel-with Vit 1.tif:219: J-3	3334	1817	0.968	0.917	-0.047	-0.125	0	-0.0780853
20071	96-UNSEP1.gel-no Vit 2.tif:247: K-7	2820	3447	0.99	0.917	-0.014	-0.125	0	-0.110507
1065	114-UNSEP1.gel-no Vit 3.tif:57: C-9	1776	5385	0.988	0.918	-0.018	-0.123	-0.222	-0.106017
3167	123-UNSEP1-noVit-top.tif:143: F-23	3412	6749	1.174	0.918	0.232	-0.123	2.3	-0.354866
7653	145-UNSEP1.gel-no Vit 2.tif:261: K-21	4173	5088	0.955	0.918	-0.066	-0.124	0.181	-0.0570066
12706	163REP2-UNSEP1.gel-no Vit 1.tif:274: L-10	7814	2868	1.394	0.918	0.48	-0.123	0.415	-0.602665
16119	79-UNSEP1.gel-no Vit 5.tif:327: N-15	2776	3802	1.201	0.918	0.265	-0.124	0.322	-0.38767
16727	81-UNSEP1.gel-no Vit 3.tif:263: K-23	2204	3861	1.105	0.918	0.144	-0.123	-0.138	-0.26748
19565	95-UNSEP1.gel-no Vit 1.tif:77: D-5	1998	2593	0.935	0.918	-0.097	-0.123	2.719	-0.0264722
2295	120-UNSEP1.gel-no Vit 1.tif:279: L-15	1823	5230	0.934	0.919	-0.099	-0.122	0.874	-0.0233577
7641	145-UNSEP1.gel-no Vit 2.tif:249: K-9	3473	5097	0.795	0.919	-0.331	-0.121	0.415	0.20911
10310	158-UNSEP1.gel-no Vit 2.tif:230: J-14	1226	1743	0.8	0.919	-0.322	-0.122	-0.585	0.200065
10856	159-UNSEP1.gel-no Vit 5.tif:104: E-8	3086	5732	0.978	0.919	-0.032	-0.123	1.29	-0.0897696
11265	160-UNSEP1.gel-no Vit 4.tif:177: H-9	4883	4128	1.361	0.919	0.444	-0.121	0.933	-0.56653
12575	163REP2-UNSEP1.gel-no Vit 1.tif:143: F-23	5463	2870	0.975	0.919	-0.037	-0.122	1.7	-0.0853374
1819	118-UNSEP1.gel-no Vit 1.tif:139: F-19	1849	5738	1.01	0.92	0.015	-0.12	-0.363	-0.13465
6189	141-UNSEP1.gel-no Vit 6.tif:141: F-21	2337	5303	0.879	0.92	-0.186	-0.12	0	0.0657707
7164	144-UNSEP1.gel-no Vit 3.tif:108: E-12	3702	4707	0.964	0.92	-0.053	-0.12	0	-0.0673993
7474	145-UNSEP1.gel-no Vit 2.tif:82: D-10	4086	5099	0.935	0.92	-0.096	-0.121	1.459	-0.0233325
8249	150-UNSEP1.gel-no Vit 1.tif:185: H-17	1711	1443	0.978	0.92	-0.032	-0.12	2.644	-0.0882006
11366	160-UNSEP1.gel-no Vit 4.tif:278: L-14	3254	4133	0.907	0.92	-0.141	-0.12	0.078	0.0205313
11422	160-UNSEP1.gel-no Vit 4.tif:334: N-22	3740	4132	1.042	0.92	0.06	-0.12	0.628	-0.17965
6087	141-UNSEP1.gel-no Vit 6.tif:39: B-15	2918	5310	1.097	0.921	0.134	-0.118	0.716	-0.25229
7507	145-UNSEP1.gel-no Vit 2.tif:115: E-19	3888	5106	0.89	0.921	-0.168	-0.119	0.241	0.0493958
7926	146-UNSEP1-noVit-top.tif:198: I-6	2885	8993	0.827	0.921	-0.274	-0.118	0.778	0.155314
12468	163REP2-UNSEP1.gel-no Vit 1.tif:36: B-12	5311	2875	0.948	0.921	-0.077	-0.119	1.399	-0.0416859
12507	163REP2-UNSEP1.gel-no Vit 1.tif:75: D-3	4808	2877	0.858	0.921	-0.221	-0.118	1.713	0.102224
15902	79-UNSEP1.gel-no Vit 5.tif:110: E-14	1754	3814	0.759	0.921	-0.398	-0.119	0.193	0.279101
17565	88-UNSEP1.gel-no Vit 2-1.tif:93: D-21	1963	4452	0.752	0.921	-0.412	-0.118	0.907	0.292468
7509	145-UNSEP1.gel-no Vit 2.tif:117: E-21	4612	5113	1.056	0.922	0.078	-0.117	0.1	-0.195771
12650	163REP2-UNSEP1.gel-no Vit 1.tif:218: J-2	7433	2878	1.326	0.922	0.408	-0.118	0.556	-0.524242
13425	167-UNSEP1.gel-no Vit 3.tif:321: N-9	2922	6751	1.08	0.922	0.112	-0.117	2.184	-0.228193
4569	127-UNSEP1-noVit-top.tif:201: I-9	2575	8257	0.922	0.923	-0.117	-0.115	0.585	0.0015639
4861	128-UNSEP1-noVit-bot.tif:157: G-13	2978	7411	0.834	0.923	-0.262	-0.116	1.547	0.146283
6359	141-UNSEP1.gel-no Vit 6.tif:311: M-23	4404	5319	1.656	0.923	0.728	-0.116	0.469	-0.8433
7623	145-UNSEP1.gel-no Vit 2.tif:231: J-15	3656	5116	0.837	0.923	-0.257	-0.116	0.1	0.141103
12529	163REP2-UNSEP1.gel-no Vit 1.tif:97: E-1	7764	2883	1.385	0.923	0.47	-0.115	1.392	-0.585483
7629	145-UNSEP1.gel-no Vit 2.tif:237: J-21	4467	5120	1.023	0.924	0.032	-0.115	0.3	-0.146841
2403	121-UNSEP1.gel-no Vit 2-1.tif:51: C-3	2684	8965	1.37	0.925	0.454	-0.113	0.907	-0.566651
5698	130-UNSEP1-noVit-bot.tif:322: N-10	3771	7814	1.046	0.925	0.065	-0.112	1.828	-0.177358
20814	98-UNSEP1.gel-no Vit 4.tif:318: N-6	2979	2487	0.98	0.925	-0.029	-0.113	-2	-0.0833284
1767	118-UNSEP1.gel-no Vit 1.tif:87: D-15	1749	5777	0.956	0.926	-0.065	-0.11	0.823	-0.0459984
7839	146-UNSEP1-noVit-top.tif:111: E-15	3471	9033	0.995	0.926	-0.008	-0.112	0	-0.103684
11908	162-UNSEP1.gel-no Vit 2.tif:148: G-4	2576	4389	0.899	0.926	-0.153	-0.111	0.971	0.0426911
12486	163REP2-UNSEP1.gel-no Vit 1.tif:54: C-6	8611	2891	1.537	0.926	0.62	-0.111	1.158	-0.731033
3908	125-UNSEP1-noVit-top.tif:212: I-20	3234	7464	0.883	0.927	-0.18	-0.109	0	0.0701559
7161	144-UNSEP1.gel-no Vit 3.tif:105: E-9	3098	4742	0.807	0.927	-0.31	-0.109	0	0.200001
7656	145-UNSEP1.gel-no Vit 2.tif:264: K-24	4276	5142	0.979	0.927	-0.031	-0.109	0.107	-0.0787395
11240	160-UNSEP1.gel-no Vit 4.tif:152: G-8	5873	4166	1.637	0.928	0.711	-0.108	1	-0.818858
12092	162-UNSEP1.gel-no Vit 2.tif:332: N-20	2628	4399	0.917	0.928	-0.124	-0.108	0.652	0.0172031
2497	121-UNSEP1.gel-no Vit 2-1.tif:145: G-1	2189	9010	1.117	0.929	0.16	-0.106	-0.115	-0.265879
6182	141-UNSEP1.gel-no Vit 6.tif:134: F-14	2736	5353	1.029	0.929	0.041	-0.107	0.263	-0.147492
7022	143-UNSEP1.gel-no Vit 4.tif:302: M-14	4198	3456	0.812	0.929	-0.301	-0.106	0.652	0.194199
12812	166-UNSEP1.gel-no Vit 4.tif:44: B-20	5602	5582	1.294	0.929	0.372	-0.107	0.823	-0.478087
13922	68-UNSEP1.gel-no Vit 4.tif:146: G-2	2088	5999	1.078	0.929	0.109	-0.107	0.363	-0.214607
5930	138-UNSEP1.gel-no Vit 1.tif:218: J-2	2555	3196	0.89	0.93	-0.169	-0.104	1.193	0.0634254
6080	141-UNSEP1.gel-no Vit 6.tif:32: B-8	2817	5361	1.059	0.93	0.083	-0.105	0.485	-0.1874
7128	144-UNSEP1.gel-no Vit 3.tif:72: C-24	3962	4755	1.031	0.93	0.045	-0.105	0.16	-0.148742
7663	145-UNSEP1.gel-no Vit 2.tif:271: L-7	3549	5155	0.812	0.93	-0.3	-0.105	1	0.195751
18165	91-UNSEP1.gel-no Vit 4.tif:21: A-21	2972	3609	0.929	0.931	-0.106	-0.103	1.115	0.00310257
19886	96-UNSEP1.gel-no Vit 2.tif:62: C-14	3191	3501	1.12	0.931	0.164	-0.103	0.193	-0.266646
1257	114-UNSEP1.gel-no Vit 3.tif:249: K-9	1745	5469	0.971	0.932	-0.043	-0.101	1.322	-0.0591413
1972	118-UNSEP1.gel-no Vit 1.tif:292: M-4	1821	5813	0.995	0.932	-0.007	-0.101	1.722	-0.0943666
3841	125-UNSEP1-noVit-top.tif:145: G-1	4938	7503	1.348	0.932	0.43	-0.102	0.503	-0.532419
6166	141-UNSEP1.gel-no Vit 6.tif:118: E-22	2654	5371	0.998	0.932	-0.003	-0.102	0.193	-0.0987099
7150	144-UNSEP1.gel-no Vit 3.tif:94: D-22	3911	4765	1.018	0.932	0.026	-0.102	0.078	-0.127336
11586	161-UNSEP1.gel-no Vit 3.tif:162: G-18	1943	2865	0.826	0.932	-0.276	-0.102	1.7	0.174188
18064	89-UNSEP1.gel-no Vit 3.tif:256: K-16	3374	3699	1.052	0.932	0.073	-0.101	0	-0.174733
1993	118-UNSEP1.gel-no Vit 1.tif:313: N-1	1879	5819	1.027	0.933	0.038	-0.1	2.044	-0.138487
14057	68-UNSEP1.gel-no Vit 4.tif:281: L-17	2262	6029	1.168	0.933	0.224	-0.099	-0.485	-0.324091
20033	96-UNSEP1.gel-no Vit 2.tif:209: I-17	2903	3508	1.019	0.933	0.028	-0.1	-0.222	-0.127205
2342	120-UNSEP1.gel-no Vit 1.tif:326: N-14	1929	5318	0.988	0.934	-0.017	-0.098	1.322	-0.0810885
4786	128-UNSEP1-noVit-bot.tif:82: D-10	4601	7501	1.288	0.934	0.365	-0.099	1.926	-0.463638
7173	144-UNSEP1.gel-no Vit 3.tif:117: E-21	3186	4779	0.829	0.934	-0.27	-0.098	0	0.17205
12455	163REP2-UNSEP1.gel-no Vit 1.tif:23: A-23	5925	2918	1.057	0.934	0.08	-0.098	0.354	-0.178481
14075	68-UNSEP1.gel-no Vit 4.tif:299: M-11	1980	6034	1.023	0.934	0.032	-0.098	-0.222	-0.131312
6235	141-UNSEP1.gel-no Vit 6.tif:187: H-19	2231	5388	0.839	0.935	-0.253	-0.097	0.241	0.156296
7347	144-UNSEP1.gel-no Vit 3.tif:291: M-3	3275	4783	0.853	0.935	-0.23	-0.097	-0.067	0.132421
12214	163-UNSEP1.gel-no Vit 1.tif:118: E-22	2761	5308	0.965	0.935	-0.051	-0.096	0.181	-0.0455626
13162	167-UNSEP1.gel-no Vit 3.tif:58: C-10	2873	6844	1.062	0.935	0.087	-0.098	1.273	-0.183745
13173	167-UNSEP1.gel-no Vit 3.tif:69: C-21	4622	6844	1.709	0.935	0.773	-0.098	1.126	-0.870114
14002	68-UNSEP1.gel-no Vit 4.tif:226: J-10	2398	6041	1.238	0.935	0.309	-0.097	-0.585	-0.404973
15724	78-UNSEP1.gel-no Vit 6.tif:268: L-4	1422	5397	0.803	0.935	-0.316	-0.097	1.503	0.219566
2611	121-UNSEP1.gel-no Vit 2-1.tif:259: K-19	1883	9075	0.961	0.936	-0.057	-0.095	0.9	-0.0380279
6009	138-UNSEP1.gel-no Vit 1.tif:297: M-9	2319	3216	0.807	0.936	-0.309	-0.095	0.541	0.21394
9044	152-UNSEP1.gel-no Vit 3.tif:308: M-20	1551	1722	1.043	0.936	0.061	-0.095	-0.152	-0.156159
11153	160-UNSEP1.gel-no Vit 4.tif:65: C-17	7118	4204	1.984	0.936	0.988	-0.095	0.585	-1.08383
13124	167-UNSEP1.gel-no Vit 3.tif:20: A-20	4274	6855	1.58	0.936	0.66	-0.095	1.684	-0.755344
15366	77-UNSEP.gel-with Vit 1.tif:246: K-6	4415	1855	1.281	0.936	0.358	-0.096	0.485	-0.45269
7554	145-UNSEP1.gel-no Vit 2.tif:162: G-18	3981	5192	0.911	0.937	-0.134	-0.095	0.241	0.040598
12156	163-UNSEP1.gel-no Vit 1.tif:60: C-12	3739	5317	1.307	0.937	0.386	-0.094	0.716	-0.480138
12212	163-UNSEP1.gel-no Vit 1.tif:116: E-20	2679	5317	0.937	0.937	-0.094	-0.094	0.181	0
15229	77-UNSEP.gel-with Vit 1.tif:109: E-13	4176	1858	1.212	0.937	0.278	-0.093	0.415	-0.371269
1022	114-UNSEP1.gel-no Vit 3.tif:14: A-14	1959	5504	1.09	0.938	0.124	-0.092	1.285	-0.216668
2519	121-UNSEP1.gel-no Vit 2-1.tif:167: G-23	1587	9099	0.81	0.938	-0.304	-0.092	0.559	0.211666
5026	128-UNSEP1-noVit-bot.tif:322: N-10	2837	7533	0.794	0.938	-0.332	-0.092	1.285	0.240449
12595	163REP2-UNSEP1.gel-no Vit 1.tif:163: G-19	6140	2928	1.096	0.938	0.132	-0.093	1.469	-0.224588
2239	120-UNSEP1.gel-no Vit 1.tif:223: J-7	2093	5345	1.072	0.939	0.1	-0.091	0	-0.191108
5503	130-UNSEP1-noVit-bot.tif:127: F-7	3960	7927	1.099	0.939	0.136	-0.091	0.794	-0.226994
6225	141-UNSEP1.gel-no Vit 6.tif:177: H-9	3073	5412	1.156	0.939	0.209	-0.091	0.276	-0.299944
9066	152-UNSEP1.gel-no Vit 3.tif:330: N-18	1487	1727	1	0.939	-8.085e-05	-0.091	0	-0.0908029
11757	161-UNSEP1.gel-no Vit 3.tif:333: N-21	2632	2888	1.119	0.939	0.162	-0.09	1.632	-0.253013
12665	163REP2-UNSEP1.gel-no Vit 1.tif:233: J-17	5248	2932	0.937	0.939	-0.095	-0.091	0.716	0.00307611
1766	118-UNSEP1.gel-no Vit 1.tif:86: D-14	1759	5859	0.961	0.94	-0.057	-0.09	0.392	-0.0318757
2043	120-UNSEP1.gel-no Vit 1.tif:27: B-3	1929	5351	0.988	0.94	-0.017	-0.089	0.933	-0.0718503
7378	144-UNSEP1.gel-no Vit 3.tif:322: N-10	3733	4805	0.972	0.94	-0.041	-0.09	0.531	-0.0482956
12140	163-UNSEP1.gel-no Vit 1.tif:44: B-20	7847	5333	2.743	0.94	1.456	-0.089	1.138	-1.54502	activator
12765	163REP2-UNSEP1.gel-no Vit 1.tif:333: N-21	5254	2934	0.938	0.94	-0.093	-0.09	0.234	0.00307283
18137	89-UNSEP1.gel-no Vit 3.tif:329: N-17	2751	3730	0.858	0.94	-0.222	-0.089	0.459	0.131683
4283	126-UNSEP1-noVit-bot.tif:251: K-11	2254	6596	0.804	0.941	-0.315	-0.088	0.585	0.226999
5005	128-UNSEP1-noVit-bot.tif:301: M-13	2884	7556	0.807	0.941	-0.309	-0.088	1.184	0.221626
5586	130-UNSEP1-noVit-bot.tif:210: I-18	3643	7949	1.011	0.941	0.015	-0.087	1.367	-0.103516
7647	145-UNSEP1.gel-no Vit 2.tif:255: K-15	3701	5217	0.847	0.941	-0.239	-0.088	0.3	0.151833
12676	163REP2-UNSEP1.gel-no Vit 1.tif:244: K-4	7786	2937	1.389	0.941	0.474	-0.088	1.115	-0.56178
14050	68-UNSEP1.gel-no Vit 4.tif:274: L-10	1907	6075	0.985	0.941	-0.022	-0.088	0.874	-0.065929
14493	74-UNSEP1.gel-no Vit 3.tif:45: B-21	2334	4903	1.28	0.941	0.357	-0.088	1.095	-0.443877
12201	163-UNSEP1.gel-no Vit 1.tif:105: E-9	2635	5346	0.921	0.942	-0.118	-0.086	0.469	0.0325259
101	110-UNSEP1.gel-no Vit 6.tif:101: E-5	1889	5915	1	0.943	0.0003183	-0.085	0.943	-0.0846703
6719	142-UNSEP1.gel-no Vit 5.tif:335: N-23	3712	4024	0.889	0.943	-0.17	-0.085	0.107	0.0850744
7408	145-UNSEP1.gel-no Vit 2.tif:16: A-16	4180	5229	0.957	0.943	-0.064	-0.084	0.087	-0.0212612
11360	160-UNSEP1.gel-no Vit 4.tif:272: L-8	4295	4235	1.197	0.943	0.259	-0.084	1.354	-0.344093
12430	163-UNSEP1.gel-no Vit 1.tif:334: N-22	3006	5351	1.051	0.943	0.072	-0.085	0.755	-0.156433
12623	163REP2-UNSEP1.gel-no Vit 1.tif:191: H-23	6427	2945	1.147	0.943	0.198	-0.085	1.322	-0.282536
6503	142-UNSEP1.gel-no Vit 5.tif:119: E-23	2796	4029	0.669	0.944	-0.579	-0.083	0.632	0.496781
7080	144-UNSEP1.gel-no Vit 3.tif:24: A-24	3207	4830	0.835	0.944	-0.26	-0.082	0.115	0.177011
7555	145-UNSEP1.gel-no Vit 2.tif:163: G-19	3825	5235	0.876	0.944	-0.192	-0.083	0.322	0.107856
8397	150-UNSEP1.gel-no Vit 1.tif:333: N-21	1923	1480	1.099	0.944	0.137	-0.084	4.907	-0.219333
9346	153-UNSEP1.gel-no Vit 4.tif:274: L-10	1479	1723	1.035	0.944	0.05	-0.083	-5.196	-0.132772
12594	163REP2-UNSEP1.gel-no Vit 1.tif:162: G-18	7808	2949	1.393	0.944	0.479	-0.083	0.823	-0.561336
7885	146-UNSEP1-noVit-top.tif:157: G-13	3064	9224	0.878	0.945	-0.188	-0.081	0.193	0.106093
11803	162-UNSEP1.gel-no Vit 2.tif:43: B-19	4270	4479	1.491	0.945	0.576	-0.082	1	-0.657894
14092	68-UNSEP1.gel-no Vit 4.tif:316: N-4	2085	6102	1.077	0.945	0.107	-0.082	-0.415	-0.188632
15260	77-UNSEP.gel-with Vit 1.tif:140: F-20	4552	1873	1.321	0.945	0.402	-0.082	0.692	-0.483244
15284	77-UNSEP.gel-with Vit 1.tif:164: G-20	4219	1872	1.225	0.945	0.292	-0.082	0.948	-0.374396
1833	118-UNSEP1.gel-no Vit 1.tif:153: G-9	1755	5902	0.959	0.946	-0.06	-0.079	-0.17	-0.0196906
3257	123-UNSEP1-noVit-top.tif:233: J-17	2370	6952	0.816	0.946	-0.294	-0.08	1.087	0.213271
5211	129-UNSEP1-noVit-top.tif:171: H-3	3541	9285	1.039	0.946	0.055	-0.08	1.237	-0.135284
7383	144-UNSEP1.gel-no Vit 3.tif:327: N-15	4357	4837	1.134	0.946	0.182	-0.08	0.485	-0.261509
7424	145-UNSEP1.gel-no Vit 2.tif:32: B-8	4030	5246	0.922	0.946	-0.116	-0.08	0.263	0.0370734
12115	163-UNSEP1.gel-no Vit 1.tif:19: A-19	2554	5370	0.893	0.946	-0.163	-0.079	0.193	0.08318
13950	68-UNSEP1.gel-no Vit 4.tif:174: H-6	1897	6110	0.98	0.946	-0.03	-0.08	0.469	-0.0509416
14048	68-UNSEP1.gel-no Vit 4.tif:272: L-8	2276	6110	1.175	0.946	0.233	-0.08	-0.485	-0.312749
20054	96-UNSEP1.gel-no Vit 2.tif:230: J-14	2647	3558	0.929	0.946	-0.106	-0.08	0.585	0.0261616
4700	127-UNSEP1-noVit-top.tif:332: N-20	3163	8465	1.133	0.947	0.18	-0.079	1.628	-0.258712
6742	143-UNSEP1.gel-no Vit 4.tif:22: A-22	3655	3522	0.707	0.947	-0.501	-0.079	0.834	0.421654
8195	150-UNSEP1.gel-no Vit 1.tif:131: F-11	1661	1485	0.95	0.947	-0.074	-0.079	2.555	-0.00456309
12721	163REP2-UNSEP1.gel-no Vit 1.tif:289: M-1	5401	2957	0.964	0.947	-0.053	-0.079	2.687	-0.0256687
3526	124-UNSEP1-noVit-bot.tif:166: G-22	3105	4845	0.847	0.948	-0.24	-0.077	0.348	0.162525
3811	125-UNSEP1-noVit-top.tif:115: E-19	3510	7631	0.958	0.948	-0.062	-0.077	2.138	-0.0151386
4630	127-UNSEP1-noVit-top.tif:262: K-22	3090	8478	1.106	0.948	0.146	-0.077	1.07	-0.222392
7903	146-UNSEP1-noVit-top.tif:175: H-7	3034	9250	0.87	0.948	-0.202	-0.077	0.152	0.123872
5551	130-UNSEP1-noVit-bot.tif:175: H-7	2690	8014	0.746	0.949	-0.422	-0.076	1	0.347232
6069	141-UNSEP1.gel-no Vit 6.tif:21: A-21	2973	5468	1.118	0.949	0.161	-0.076	0.093	-0.23644
6071	141-UNSEP1.gel-no Vit 6.tif:23: A-23	2716	5468	1.021	0.949	0.031	-0.076	0.093	-0.105503
6275	141-UNSEP1.gel-no Vit 6.tif:227: J-11	2268	5472	0.853	0.949	-0.229	-0.075	0.17	0.153862
9781	156-UNSEP1.gel-no Vit 3.tif:37: B-13	1202	1455	0.727	0.949	-0.46	-0.075	0.17	0.384453
11348	160-UNSEP1.gel-no Vit 4.tif:260: K-20	3077	4263	0.857	0.949	-0.222	-0.075	0.766	0.147113
13309	167-UNSEP1.gel-no Vit 3.tif:205: I-13	2625	6951	0.971	0.949	-0.043	-0.075	1.495	-0.0330632
15282	77-UNSEP.gel-with Vit 1.tif:162: G-18	3680	1881	1.068	0.949	0.095	-0.075	0	-0.170432
18080	89-UNSEP1.gel-no Vit 3.tif:272: L-8	3107	3767	0.969	0.949	-0.046	-0.075	0	-0.0300886
4254	126-UNSEP1-noVit-bot.tif:222: J-6	2480	6659	0.885	0.95	-0.177	-0.075	0.222	0.10225
7240	144-UNSEP1.gel-no Vit 3.tif:184: H-16	3167	4860	0.824	0.95	-0.278	-0.074	0.222	0.205283
13969	68-UNSEP1.gel-no Vit 4.tif:193: I-1	2128	6137	1.099	0.95	0.136	-0.074	-0.415	-0.210192
5319	129-UNSEP1-noVit-top.tif:279: L-15	3166	9331	0.929	0.951	-0.107	-0.073	1.04	0.0337667
7608	145-UNSEP1.gel-no Vit 2.tif:216: I-24	3870	5274	0.886	0.951	-0.175	-0.072	0.222	0.102139
9253	153-UNSEP1.gel-no Vit 4.tif:181: H-13	1556	1736	1.089	0.951	0.123	-0.073	-1.585	-0.195487
9373	153-UNSEP1.gel-no Vit 4.tif:301: M-13	1492	1736	1.044	0.951	0.062	-0.073	-3.322	-0.134604
13414	167-UNSEP1.gel-no Vit 3.tif:310: M-22	2469	6963	0.913	0.951	-0.131	-0.073	1.17	0.0588305
13430	167-UNSEP1.gel-no Vit 3.tif:326: N-14	2403	6965	0.889	0.951	-0.17	-0.072	0.71	0.0972619
100	110-UNSEP1.gel-no Vit 6.tif:100: E-4	1783	5974	0.944	0.952	-0.083	-0.071	-0.322	0.0121747
5651	130-UNSEP1-noVit-bot.tif:275: L-11	2670	8037	0.741	0.952	-0.433	-0.071	1	0.361488
5946	138-UNSEP1.gel-no Vit 1.tif:234: J-18	2352	3271	0.819	0.952	-0.288	-0.071	1.193	0.217098
6277	141-UNSEP1.gel-no Vit 6.tif:229: J-13	2718	5488	1.022	0.952	0.032	-0.071	0.585	-0.102362
7699	145-UNSEP1.gel-no Vit 2.tif:307: M-19	4177	5278	0.956	0.952	-0.065	-0.071	0.415	-0.00604904
10848	159-UNSEP1.gel-no Vit 5.tif:96: D-24	3128	5940	0.991	0.952	-0.013	-0.071	1.466	-0.0579235
12985	166-UNSEP1.gel-no Vit 4.tif:217: J-1	5325	5719	1.23	0.952	0.298	-0.072	1.762	-0.369625
20038	96-UNSEP1.gel-no Vit 2.tif:214: I-22	3166	3579	1.112	0.952	0.153	-0.071	-0.322	-0.224123
6279	141-UNSEP1.gel-no Vit 6.tif:231: J-15	2235	5491	0.841	0.953	-0.251	-0.07	0.107	0.18037
7675	145-UNSEP1.gel-no Vit 2.tif:283: L-19	4113	5285	0.941	0.953	-0.087	-0.069	0.222	0.0182815
13556	168-UNSEP1.gel-no Vit 2.tif:116: E-20	2426	5966	0.973	0.953	-0.039	-0.07	0.341	-0.0299636
19947	96-UNSEP1.gel-no Vit 2.tif:123: F-3	3164	3583	1.111	0.953	0.152	-0.069	1.222	-0.221311
5606	130-UNSEP1-noVit-bot.tif:230: J-14	3034	8058	0.842	0.954	-0.249	-0.068	0.585	0.180169
6311	141-UNSEP1.gel-no Vit 6.tif:263: K-23	2792	5498	1.05	0.954	0.07	-0.068	0.074	-0.138328
6936	143-UNSEP1.gel-no Vit 4.tif:216: I-24	5844	3548	1.13	0.954	0.176	-0.068	0.322	-0.244262
12662	163REP2-UNSEP1.gel-no Vit 1.tif:230: J-14	7541	2980	1.346	0.954	0.428	-0.068	0.305	-0.496617
12874	166-UNSEP1.gel-no Vit 4.tif:106: E-10	5345	5736	1.234	0.954	0.304	-0.067	0.531	-0.371281
14043	68-UNSEP1.gel-no Vit 4.tif:267: L-3	1843	6163	0.952	0.954	-0.071	-0.068	0.71	0.00302769
14953	76-UNSEP1.gel-no Vit 2.tif:169: H-1	1488	5123	1.053	0.954	0.075	-0.068	0	-0.142444
16121	79-UNSEP1.gel-no Vit 5.tif:329: N-17	2372	3951	1.027	0.954	0.038	-0.068	0	-0.106375
2323	120-UNSEP1.gel-no Vit 1.tif:307: M-19	1727	5436	0.885	0.955	-0.177	-0.067	0.193	0.109823
2391	121-UNSEP1.gel-no Vit 2-1.tif:39: B-15	1891	9256	0.965	0.955	-0.051	-0.067	0.659	-0.0150282
4532	127-UNSEP1-noVit-top.tif:164: G-20	2960	8540	1.06	0.955	0.084	-0.067	1	-0.150492
7217	144-UNSEP1.gel-no Vit 3.tif:161: G-17	3783	4884	0.985	0.955	-0.022	-0.066	0	-0.044623
7936	146-UNSEP1-noVit-top.tif:208: I-16	3680	9324	1.055	0.955	0.077	-0.066	0.415	-0.14367
12275	163-UNSEP1.gel-no Vit 1.tif:179: H-11	2547	5417	0.89	0.955	-0.167	-0.067	0.387	0.101695
12548	163REP2-UNSEP1.gel-no Vit 1.tif:116: E-20	5487	2981	0.979	0.955	-0.03	-0.067	1.67	-0.0358081
16210	80-UNSEP1.gel-no Vit 4.tif:82: D-10	2025	5237	0.978	0.955	-0.032	-0.067	1.1	-0.0343337
3406	124-UNSEP1-noVit-bot.tif:46: B-22	5399	4886	1.472	0.956	0.558	-0.065	2.366	-0.622695
5445	130-UNSEP1-noVit-bot.tif:69: C-21	3951	8076	1.096	0.956	0.132	-0.064	0.61	-0.197165
11756	161-UNSEP1.gel-no Vit 3.tif:332: N-20	2557	2939	1.087	0.956	0.12	-0.065	1.854	-0.185269
11923	162-UNSEP1.gel-no Vit 2.tif:163: G-19	2206	4531	0.77	0.956	-0.377	-0.065	0.107	0.312152
12431	163-UNSEP1.gel-no Vit 1.tif:335: N-23	3170	5427	1.108	0.956	0.148	-0.064	0.248	-0.212875
12700	163REP2-UNSEP1.gel-no Vit 1.tif:268: L-4	6805	2984	1.214	0.956	0.28	-0.066	0.637	-0.344686
13333	167-UNSEP1.gel-no Vit 3.tif:229: J-13	2789	7000	1.031	0.956	0.044	-0.065	2.293	-0.108962
2482	121-UNSEP1.gel-no Vit 2-1.tif:130: F-10	1939	9281	0.99	0.957	-0.015	-0.063	0.778	-0.0489096
7010	143-UNSEP1.gel-no Vit 4.tif:290: M-2	4050	3559	0.783	0.957	-0.353	-0.064	0.158	0.289507
7504	145-UNSEP1.gel-no Vit 2.tif:112: E-16	3861	5303	0.884	0.957	-0.178	-0.064	0.222	0.114473
7572	145-UNSEP1.gel-no Vit 2.tif:180: H-12	3372	5306	0.772	0.957	-0.374	-0.063	0.241	0.309918
8371	150-UNSEP1.gel-no Vit 1.tif:307: M-19	1843	1501	1.054	0.957	0.076	-0.063	4.059	-0.139284
10844	159-UNSEP1.gel-no Vit 5.tif:92: D-20	2565	5971	0.813	0.957	-0.299	-0.064	0.415	0.235264
12651	163REP2-UNSEP1.gel-no Vit 1.tif:219: J-3	8237	2988	1.47	0.957	0.556	-0.064	0.722	-0.619225
20011	96-UNSEP1.gel-no Vit 2.tif:187: H-19	3058	3598	1.074	0.957	0.103	-0.063	0	-0.166403
5519	130-UNSEP1-noVit-bot.tif:143: F-23	3487	8087	0.967	0.958	-0.048	-0.062	0.497	-0.0134902
6363	141-UNSEP1.gel-no Vit 6.tif:315: N-3	3066	5525	1.153	0.958	0.205	-0.061	0.115	-0.267295
10895	159-UNSEP1.gel-no Vit 5.tif:143: F-23	2520	5981	0.799	0.958	-0.325	-0.061	0.447	0.26183
12840	166-UNSEP1.gel-no Vit 4.tif:72: C-24	3844	5757	0.888	0.958	-0.172	-0.062	0.663	0.109466
13174	167-UNSEP1.gel-no Vit 3.tif:70: C-22	2678	7018	0.99	0.958	-0.014	-0.061	1.3	-0.0474029
4455	127-UNSEP1-noVit-top.tif:87: D-15	2566	8579	0.919	0.959	-0.122	-0.06	1.087	0.061466
4507	127-UNSEP1-noVit-top.tif:139: F-19	2882	8573	1.032	0.959	0.045	-0.061	0.29	-0.10584
4911	128-UNSEP1-noVit-bot.tif:207: I-15	2613	7698	0.732	0.959	-0.451	-0.061	1	0.389687
5650	130-UNSEP1-noVit-bot.tif:274: L-10	3746	8102	1.039	0.959	0.056	-0.06	1.688	-0.115593
9401	153-UNSEP1.gel-no Vit 4.tif:329: N-17	1529	1750	1.07	0.959	0.097	-0.061	-1.459	-0.158008
13399	167-UNSEP1.gel-no Vit 3.tif:295: M-7	2308	7022	0.853	0.959	-0.229	-0.061	1.184	0.168985
13474	168-UNSEP1.gel-no Vit 2.tif:34: B-10	2578	6007	1.034	0.959	0.048	-0.06	0.867	-0.108633
18109	89-UNSEP1.gel-no Vit 3.tif:301: M-13	3321	3804	1.035	0.959	0.05	-0.061	0	-0.110028
6178	141-UNSEP1.gel-no Vit 6.tif:130: F-10	2390	5532	0.899	0.96	-0.154	-0.059	0.107	0.0947133
6249	141-UNSEP1.gel-no Vit 6.tif:201: I-9	2615	5532	0.983	0.96	-0.024	-0.059	0.348	-0.034157
7391	144-UNSEP1.gel-no Vit 3.tif:335: N-23	4636	4911	1.207	0.96	0.271	-0.058	0.17	-0.330319
12634	163REP2-UNSEP1.gel-no Vit 1.tif:202: I-10	9665	2998	1.725	0.96	0.786	-0.059	0.415	-0.84549
14326	70-UNSEP1.gel-no Vit 4.tif:214: I-22	1885	4722	0.947	0.96	-0.078	-0.058	0.115	0.01967
15429	77-UNSEP.gel-with Vit 1.tif:309: M-21	4209	1902	1.222	0.96	0.289	-0.059	0.3	-0.348138
19956	96-UNSEP1.gel-no Vit 2.tif:132: F-12	2967	3608	1.042	0.96	0.059	-0.059	0	-0.118249
4839	128-UNSEP1-noVit-bot.tif:135: F-15	2758	7720	0.772	0.961	-0.373	-0.057	0.152	0.315936
5513	130-UNSEP1-noVit-bot.tif:137: F-17	3341	8118	0.927	0.961	-0.11	-0.057	0.858	0.0519671
7184	144-UNSEP1.gel-no Vit 3.tif:128: F-8	3117	4917	0.811	0.961	-0.301	-0.057	0.1	0.244835
8156	150-UNSEP1.gel-no Vit 1.tif:92: D-20	1949	1508	1.114	0.961	0.156	-0.057	3	-0.213141
11869	162-UNSEP1.gel-no Vit 2.tif:109: E-13	2553	4557	0.891	0.961	-0.166	-0.057	1.759	0.109111
14071	68-UNSEP1.gel-no Vit 4.tif:295: M-7	2205	6205	1.139	0.961	0.187	-0.058	-0.485	-0.245159
6115	141-UNSEP1.gel-no Vit 6.tif:67: C-19	2897	5547	1.09	0.962	0.124	-0.055	0.082	-0.180219
9376	153-UNSEP1.gel-no Vit 4.tif:304: M-16	1567	1756	1.097	0.962	0.133	-0.056	-0.415	-0.189455
12398	163-UNSEP1.gel-no Vit 1.tif:302: M-14	2890	5456	1.01	0.962	0.015	-0.057	0.524	-0.0702465
3276	123-UNSEP1-noVit-top.tif:252: K-12	2708	7080	0.932	0.963	-0.102	-0.054	0.17	0.0472058
3997	125-UNSEP1-noVit-top.tif:301: M-13	3321	7755	0.906	0.963	-0.142	-0.054	-0.415	0.0880247
4665	127-UNSEP1-noVit-top.tif:297: M-9	2770	8609	0.992	0.963	-0.012	-0.055	0.138	-0.0428043
9822	156-UNSEP1.gel-no Vit 3.tif:78: D-6	1230	1476	0.744	0.963	-0.427	-0.055	-0.415	0.372233
11926	162-UNSEP1.gel-no Vit 2.tif:166: G-22	2506	4565	0.875	0.963	-0.193	-0.054	0	0.138253
20055	96-UNSEP1.gel-no Vit 2.tif:231: J-15	3009	3622	1.057	0.963	0.079	-0.054	0.263	-0.134368
1888	118-UNSEP1.gel-no Vit 1.tif:208: I-16	1859	6013	1.016	0.964	0.023	-0.052	-0.585	-0.0757954
5232	129-UNSEP1-noVit-top.tif:192: H-24	3127	9464	0.917	0.964	-0.125	-0.052	0.222	0.0721114
7309	144-UNSEP1.gel-no Vit 3.tif:253: K-13	3546	4928	0.923	0.964	-0.115	-0.053	0	0.0627025
7413	145-UNSEP1.gel-no Vit 2.tif:21: A-21	4818	5342	1.103	0.964	0.141	-0.054	0.087	-0.194328
12142	163-UNSEP1.gel-no Vit 1.tif:46: B-22	3262	5469	1.14	0.964	0.19	-0.053	0.126	-0.241929
15003	76-UNSEP1.gel-no Vit 2.tif:219: J-3	1487	5177	1.053	0.964	0.074	-0.052	0	-0.1274
2572	121-UNSEP1.gel-no Vit 2-1.tif:220: J-4	2176	9359	1.111	0.965	0.151	-0.051	0.459	-0.203258
4477	127-UNSEP1-noVit-top.tif:109: E-13	3769	8630	1.349	0.965	0.432	-0.051	-0.193	-0.48329
7570	145-UNSEP1.gel-no Vit 2.tif:178: H-10	3384	5349	0.775	0.965	-0.368	-0.052	0	0.316333
11935	162-UNSEP1.gel-no Vit 2.tif:175: H-7	2363	4572	0.825	0.965	-0.278	-0.052	0.241	0.226135
13554	168-UNSEP1.gel-no Vit 2.tif:114: E-18	2513	6039	1.008	0.965	0.012	-0.052	1.478	-0.0628948
13971	68-UNSEP1.gel-no Vit 4.tif:195: I-3	2047	6235	1.057	0.965	0.08	-0.051	0.907	-0.131375
121	110-UNSEP1.gel-no Vit 6.tif:121: F-1	1769	6062	0.937	0.966	-0.094	-0.05	0	0.0439741
9231	153-UNSEP1.gel-no Vit 4.tif:159: G-15	1598	1763	1.118	0.966	0.161	-0.05	-1.263	-0.210825
12309	163-UNSEP1.gel-no Vit 1.tif:213: I-21	2539	5481	0.888	0.966	-0.172	-0.05	0.415	0.121464
12404	163-UNSEP1.gel-no Vit 1.tif:308: M-20	2980	5480	1.042	0.966	0.059	-0.05	0.737	-0.10926
12727	163REP2-UNSEP1.gel-no Vit 1.tif:295: M-7	7846	3017	1.4	0.966	0.486	-0.05	0.556	-0.535332
1346	116-UNSEP1.gel-no Vit 2-1.tif:2: A-2	2323	6948	1.215	0.967	0.282	-0.048	0.907	-0.329369
6130	141-UNSEP1.gel-no Vit 6.tif:82: D-10	2527	5575	0.95	0.967	-0.073	-0.048	0	0.0255884
8994	152-UNSEP1.gel-no Vit 3.tif:258: K-18	1524	1779	1.025	0.967	0.035	-0.048	0.531	-0.0840361
13195	167-UNSEP1.gel-no Vit 3.tif:91: D-19	3310	7081	1.224	0.967	0.292	-0.048	1.791	-0.340016
5664	130-UNSEP1-noVit-bot.tif:288: L-24	3902	8172	1.083	0.968	0.114	-0.047	1.322	-0.161954
10318	158-UNSEP1.gel-no Vit 2.tif:238: J-22	1236	1836	0.807	0.968	-0.31	-0.047	-0.348	0.262438
19132	93-UNSEP1.gel-no Vit 6.tif:316: N-4	2709	2790	0.991	0.968	-0.013	-0.047	0	-0.033878
4984	128-UNSEP1-noVit-bot.tif:280: L-16	2946	7781	0.825	0.969	-0.278	-0.046	0.387	0.232103
5366	129-UNSEP1-noVit-top.tif:326: N-14	2946	9506	0.864	0.969	-0.211	-0.046	0.637	0.165465
8302	150-UNSEP1.gel-no Vit 1.tif:238: J-22	1823	1520	1.042	0.969	0.06	-0.045	3.322	-0.104787
8680	151-UNSEP1.gel-no Vit 2-1.tif:280: L-16	1440	1408	0.977	0.969	-0.034	-0.046	2.474	-0.0118619
12302	163-UNSEP1.gel-no Vit 1.tif:206: I-14	2685	5498	0.939	0.969	-0.091	-0.046	1.17	0.0453715
13852	68-UNSEP1.gel-no Vit 4.tif:76: D-4	2308	6257	1.192	0.969	0.253	-0.046	-0.152	-0.298816
14049	68-UNSEP1.gel-no Vit 4.tif:273: L-9	2443	6256	1.262	0.969	0.335	-0.046	-0.485	-0.381143
14816	76-UNSEP1.gel-no Vit 2.tif:32: B-8	2140	5202	1.515	0.969	0.599	-0.045	0.322	-0.644749
1085	114-UNSEP1.gel-no Vit 3.tif:77: D-5	2168	5690	1.206	0.97	0.27	-0.044	1.147	-0.314173
5203	129-UNSEP1-noVit-top.tif:163: G-19	3448	9518	1.011	0.97	0.016	-0.044	1.254	-0.0597263
5652	130-UNSEP1-noVit-bot.tif:276: L-12	2652	8188	0.736	0.97	-0.443	-0.045	0.9	0.398279
19987	96-UNSEP1.gel-no Vit 2.tif:163: G-19	3303	3646	1.16	0.97	0.214	-0.044	-0.737	-0.258068
7281	144-UNSEP1.gel-no Vit 3.tif:225: J-9	3919	4965	1.02	0.971	0.029	-0.043	0.222	-0.071026
7366	144-UNSEP1.gel-no Vit 3.tif:310: M-22	4286	4966	1.116	0.971	0.158	-0.042	0.152	-0.200794
12015	162-UNSEP1.gel-no Vit 2.tif:255: K-15	2403	4604	0.839	0.971	-0.253	-0.042	0.17	0.2108
12687	163REP2-UNSEP1.gel-no Vit 1.tif:255: K-15	6805	3032	1.214	0.971	0.28	-0.043	0.771	-0.322225
20154	96-UNSEP1.gel-no Vit 2.tif:330: N-18	3449	3650	1.211	0.971	0.276	-0.043	-0.322	-0.318656
410	111-UNSEP1.gel-no Vit 5.tif:74: D-2	1924	5016	1.003	0.972	0.005	-0.04	0.954	-0.0452934
653	111-UNSEP1.gel-no Vit 5.tif:317: N-5	2437	5015	1.271	0.972	0.346	-0.041	-0.322	-0.386936
2653	121-UNSEP1.gel-no Vit 2-1.tif:301: M-13	1811	9428	0.924	0.972	-0.114	-0.04	0.716	0.0730635
12967	166-UNSEP1.gel-no Vit 4.tif:199: I-7	4297	5842	0.992	0.972	-0.011	-0.041	0.637	-0.0293838
19703	95-UNSEP1.gel-no Vit 1.tif:215: I-23	1562	2746	0.731	0.972	-0.452	-0.041	0.126	0.411085
1171	114-UNSEP1.gel-no Vit 3.tif:163: G-19	1636	5706	0.91	0.973	-0.136	-0.04	-0.107	0.0965733
5384	130-UNSEP1-noVit-bot.tif:8: A-8	4506	8214	1.25	0.973	0.322	-0.04	0.459	-0.361416
10998	159-UNSEP1.gel-no Vit 5.tif:246: K-6	2883	6073	0.914	0.973	-0.13	-0.039	2.433	0.0902456
11008	159-UNSEP1.gel-no Vit 5.tif:256: K-16	2437	6071	0.772	0.973	-0.373	-0.04	1.222	0.333839
19858	96-UNSEP1.gel-no Vit 2.tif:34: B-10	3424	3657	1.202	0.973	0.266	-0.04	-0.737	-0.304925
585	111-UNSEP1.gel-no Vit 5.tif:249: K-9	2106	5023	1.098	0.974	0.135	-0.038	-0.263	-0.172884
10819	159-UNSEP1.gel-no Vit 5.tif:67: C-19	3969	6079	1.258	0.974	0.331	-0.038	1.898	-0.369138
12245	163-UNSEP1.gel-no Vit 1.tif:149: G-5	2754	5526	0.963	0.974	-0.055	-0.038	1.303	0.016386
12408	163-UNSEP1.gel-no Vit 1.tif:312: M-24	4407	5527	1.541	0.974	0.624	-0.038	0.17	-0.661873
15204	77-UNSEP.gel-with Vit 1.tif:84: D-12	5034	1930	1.461	0.974	0.547	-0.038	0.115	-0.584963
18084	89-UNSEP1.gel-no Vit 3.tif:276: L-12	3215	3863	1.002	0.974	0.003	-0.039	-0.263	-0.0408888
130	110-UNSEP1.gel-no Vit 6.tif:130: F-10	2050	6119	1.085	0.975	0.118	-0.036	-0.126	-0.154221
11101	160-UNSEP1.gel-no Vit 4.tif:13: A-13	3884	4380	1.082	0.975	0.114	-0.036	0.788	-0.150226
14072	68-UNSEP1.gel-no Vit 4.tif:296: M-8	2331	6296	1.204	0.975	0.268	-0.037	-0.222	-0.304361
16239	80-UNSEP1.gel-no Vit 4.tif:111: E-15	2104	5347	1.017	0.975	0.024	-0.037	1.692	-0.0608456
5440	130-UNSEP1-noVit-bot.tif:64: C-16	3751	8246	1.041	0.976	0.057	-0.034	1.7	-0.093017
8239	150-UNSEP1.gel-no Vit 1.tif:175: H-7	1406	1530	0.804	0.976	-0.315	-0.036	0.263	0.279686
10845	159-UNSEP1.gel-no Vit 5.tif:93: D-21	2672	6093	0.847	0.976	-0.24	-0.034	1.144	0.204519
13977	68-UNSEP1.gel-no Vit 4.tif:201: I-9	1945	6307	1.004	0.976	0.006	-0.034	0.7	-0.0408062
2623	121-UNSEP1.gel-no Vit 2-1.tif:271: L-7	2186	9473	1.116	0.977	0.158	-0.034	0.3	-0.191907
5825	138-UNSEP1.gel-no Vit 1.tif:113: E-17	1772	3355	0.617	0.977	-0.697	-0.034	0.263	0.663088
6172	141-UNSEP1.gel-no Vit 6.tif:124: F-4	2747	5630	1.033	0.977	0.047	-0.034	0.107	-0.0804098
6329	141-UNSEP1.gel-no Vit 6.tif:281: L-17	2775	5629	1.044	0.977	0.062	-0.034	0.193	-0.0956912
7136	144-UNSEP1.gel-no Vit 3.tif:80: D-8	3467	4999	0.903	0.977	-0.148	-0.033	0.341	0.113633
7775	146-UNSEP1-noVit-top.tif:47: B-23	3526	9539	1.011	0.977	0.015	-0.033	0	-0.0493525
12903	166-UNSEP1.gel-no Vit 4.tif:135: F-15	4808	5875	1.11	0.977	0.151	-0.033	1.951	-0.184129
12980	166-UNSEP1.gel-no Vit 4.tif:212: I-20	3800	5874	0.878	0.977	-0.188	-0.033	0.152	0.154138
13440	167-UNSEP1.gel-no Vit 3.tif:336: N-24	2329	7158	0.861	0.977	-0.216	-0.033	0.305	0.182345
19963	96-UNSEP1.gel-no Vit 2.tif:139: F-19	2810	3672	0.987	0.977	-0.019	-0.034	-0.585	-0.0146915
189	110-UNSEP1.gel-no Vit 6.tif:189: H-21	2060	6138	1.091	0.978	0.125	-0.032	1.322	-0.157745
6332	141-UNSEP1.gel-no Vit 6.tif:284: L-20	3084	5639	1.16	0.978	0.214	-0.032	0.16	-0.246218
7171	144-UNSEP1.gel-no Vit 3.tif:115: E-19	3365	5003	0.876	0.978	-0.191	-0.032	0.16	0.158904
7568	145-UNSEP1.gel-no Vit 2.tif:176: H-8	3542	5420	0.811	0.978	-0.303	-0.033	0.322	0.270133
11086	159-UNSEP1.gel-no Vit 5.tif:334: N-22	3389	6104	1.074	0.978	0.103	-0.032	1.429	-0.135088
12513	163REP2-UNSEP1.gel-no Vit 1.tif:81: D-9	5013	3055	0.895	0.978	-0.161	-0.032	1.322	0.127947
13490	168-UNSEP1.gel-no Vit 2.tif:50: C-2	3455	6124	1.386	0.978	0.471	-0.032	0.856	-0.503021
13777	68-UNSEP1.gel-no Vit 4.tif:1: A-1	5599	6320	2.892	0.978	1.532	-0.031	0.1	-1.56416	activator
14019	68-UNSEP1.gel-no Vit 4.tif:243: K-3	2100	6320	1.085	0.978	0.117	-0.031	0.193	-0.149789
19986	96-UNSEP1.gel-no Vit 2.tif:162: G-18	2908	3677	1.021	0.978	0.03	-0.032	1.263	-0.0620765
4026	125-UNSEP1-noVit-top.tif:330: N-18	4929	7880	1.345	0.979	0.428	-0.031	0	-0.458225
4834	128-UNSEP1-noVit-bot.tif:130: F-10	3095	7863	0.867	0.979	-0.207	-0.031	1.064	0.175277
6066	141-UNSEP1.gel-no Vit 6.tif:18: A-18	2811	5642	1.057	0.979	0.08	-0.031	0.115	-0.110595
6383	141-UNSEP1.gel-no Vit 6.tif:335: N-23	3562	5641	1.34	0.979	0.422	-0.031	0.131	-0.452852
7310	144-UNSEP1.gel-no Vit 3.tif:254: K-14	3527	5009	0.918	0.979	-0.123	-0.03	0.115	0.0928147
9299	153-UNSEP1.gel-no Vit 4.tif:227: J-11	1682	1787	1.177	0.979	0.235	-0.031	-0.585	-0.265734
15083	76-UNSEP1.gel-no Vit 2.tif:299: M-11	1581	5254	1.119	0.979	0.163	-0.031	0.138	-0.192829
16349	80-UNSEP1.gel-no Vit 4.tif:221: J-5	2199	5369	1.062	0.979	0.087	-0.031	-0.115	-0.117403
4844	128-UNSEP1-noVit-bot.tif:140: F-20	2917	7874	0.817	0.98	-0.292	-0.028	0.363	0.262446
4858	128-UNSEP1-noVit-bot.tif:154: G-10	3230	7868	0.904	0.98	-0.145	-0.03	0.415	0.116459
10823	159-UNSEP1.gel-no Vit 5.tif:71: C-23	2603	6114	0.825	0.98	-0.278	-0.029	1	0.248388
10932	159-UNSEP1.gel-no Vit 5.tif:180: H-12	3034	6116	0.961	0.98	-0.057	-0.029	2.379	0.0282453
12301	163-UNSEP1.gel-no Vit 1.tif:205: I-13	2871	5561	1.004	0.98	0.005	-0.029	0.387	-0.0349056
2500	121-UNSEP1.gel-no Vit 2-1.tif:148: G-4	2344	9508	1.196	0.981	0.259	-0.028	0.858	-0.285892
4913	128-UNSEP1-noVit-bot.tif:209: I-17	2766	7881	0.774	0.981	-0.369	-0.027	0.415	0.34192
5368	129-UNSEP1-noVit-top.tif:328: N-16	3226	9626	0.946	0.981	-0.08	-0.028	1.367	0.052413
11123	160-UNSEP1.gel-no Vit 4.tif:35: B-11	4405	4403	1.228	0.981	0.296	-0.028	0.453	-0.323986
7118	144-UNSEP1.gel-no Vit 3.tif:62: C-14	4390	5024	1.143	0.982	0.193	-0.026	0.28	-0.21903
7313	144-UNSEP1.gel-no Vit 3.tif:257: K-17	4280	5021	1.114	0.982	0.156	-0.027	0.613	-0.181954
12552	163REP2-UNSEP1.gel-no Vit 1.tif:120: E-24	4635	3065	0.827	0.982	-0.274	-0.027	1.485	0.247836
13532	168-UNSEP1.gel-no Vit 2.tif:92: D-20	2561	6148	1.027	0.982	0.039	-0.026	0.322	-0.0646413
13550	168-UNSEP1.gel-no Vit 2.tif:110: E-14	2695	6151	1.081	0.982	0.112	-0.025	0.485	-0.138572
16047	79-UNSEP1.gel-no Vit 5.tif:255: K-15	1894	4070	0.82	0.982	-0.287	-0.026	0.222	0.260099
4248	126-UNSEP1-noVit-bot.tif:216: I-24	2026	6892	0.723	0.983	-0.469	-0.025	0.126	0.443196
6379	141-UNSEP1.gel-no Vit 6.tif:331: N-19	2462	5668	0.926	0.983	-0.111	-0.024	0.3	0.0861792
11992	162-UNSEP1.gel-no Vit 2.tif:232: J-16	2778	4660	0.97	0.983	-0.044	-0.025	1.147	0.0192067
20102	96-UNSEP1.gel-no Vit 2.tif:278: L-14	3200	3695	1.124	0.983	0.168	-0.025	-0.585	-0.193379
4499	127-UNSEP1-noVit-top.tif:131: F-11	2868	8797	1.027	0.984	0.038	-0.024	0.193	-0.061706
10362	158-UNSEP1.gel-no Vit 2.tif:282: L-18	1376	1868	0.898	0.984	-0.155	-0.023	-0.778	0.131943
15391	77-UNSEP.gel-with Vit 1.tif:271: L-7	4089	1951	1.187	0.984	0.247	-0.023	0.348	-0.27059
19450	94-UNSEP1.gel-no Vit 1.tif:298: M-10	1742	5743	0.901	0.984	-0.151	-0.023	0.138	0.127131
3162	123-UNSEP1-noVit-top.tif:138: F-18	2729	7239	0.939	0.985	-0.091	-0.022	0	0.0689986
7113	144-UNSEP1.gel-no Vit 3.tif:57: C-9	3601	5036	0.937	0.985	-0.093	-0.022	0.087	0.0720747
11949	162-UNSEP1.gel-no Vit 2.tif:189: H-21	3517	4667	1.228	0.985	0.296	-0.022	0.126	-0.318115
12914	166-UNSEP1.gel-no Vit 4.tif:146: G-2	4750	5920	1.097	0.985	0.134	-0.022	1.078	-0.155368
4892	128-UNSEP1-noVit-bot.tif:188: H-20	3233	7922	0.905	0.986	-0.144	-0.02	1.781	0.12367
12135	163-UNSEP1.gel-no Vit 1.tif:39: B-15	3169	5596	1.108	0.986	0.148	-0.02	0.474	-0.168298
13204	167-UNSEP1.gel-no Vit 3.tif:100: E-4	3859	7219	1.427	0.986	0.513	-0.021	0.503	-0.533326
13942	68-UNSEP1.gel-no Vit 4.tif:166: G-22	1899	6371	0.981	0.986	-0.028	-0.02	0.322	0.00733451
13961	68-UNSEP1.gel-no Vit 4.tif:185: H-17	2689	6372	1.389	0.986	0.474	-0.02	-0.152	-0.494387
13996	68-UNSEP1.gel-no Vit 4.tif:220: J-4	1976	6367	1.02	0.986	0.029	-0.021	-0.222	-0.0489096
15205	77-UNSEP.gel-with Vit 1.tif:85: D-13	5339	1955	1.55	0.986	0.632	-0.02	0.115	-0.652609
15585	78-UNSEP1.gel-no Vit 6.tif:129: F-9	1999	5687	1.129	0.986	0.175	-0.021	0.107	-0.195386
19564	95-UNSEP1.gel-no Vit 1.tif:76: D-4	2127	2786	0.995	0.986	-0.007	-0.02	2.603	-0.0131089
625	111-UNSEP1.gel-no Vit 5.tif:289: M-1	2023	5094	1.055	0.987	0.077	-0.018	0.778	-0.096121
951	113-UNSEP1.gel-no Vit 4.tif:279: L-15	1836	6624	0.952	0.987	-0.071	-0.019	1.202	0.0520885
7051	143-UNSEP1.gel-no Vit 4.tif:331: N-19	6382	3672	1.234	0.987	0.303	-0.018	0.322	-0.32222
7174	144-UNSEP1.gel-no Vit 3.tif:118: E-22	3965	5047	1.032	0.987	0.046	-0.019	0.248	-0.064321
7367	144-UNSEP1.gel-no Vit 3.tif:311: M-23	6391	5049	1.664	0.987	0.734	-0.018	0.144	-0.753533
7406	145-UNSEP1.gel-no Vit 2.tif:14: A-14	4028	5470	0.922	0.987	-0.117	-0.019	0.107	0.0982833
7519	145-UNSEP1.gel-no Vit 2.tif:127: F-7	3554	5470	0.814	0.987	-0.298	-0.019	0.663	0.278021
12791	166-UNSEP1.gel-no Vit 4.tif:23: A-23	4892	5935	1.13	0.987	0.176	-0.018	1.234	-0.195201
14051	68-UNSEP1.gel-no Vit 4.tif:275: L-11	2100	6374	1.085	0.987	0.117	-0.019	-0.222	-0.136573
15363	77-UNSEP.gel-with Vit 1.tif:243: K-3	4539	1957	1.317	0.987	0.398	-0.018	0	-0.416133
18007	89-UNSEP1.gel-no Vit 3.tif:199: I-7	3184	3916	0.993	0.987	-0.011	-0.019	0	-0.00874363
20093	96-UNSEP1.gel-no Vit 2.tif:269: L-5	2633	3712	0.925	0.987	-0.113	-0.018	-0.193	0.0935967
5008	128-UNSEP1-noVit-bot.tif:304: M-16	2678	7938	0.75	0.988	-0.415	-0.017	0	0.39762
6092	141-UNSEP1.gel-no Vit 6.tif:44: B-20	3039	5695	1.143	0.988	0.193	-0.017	0.222	-0.210242
7718	145-UNSEP1.gel-no Vit 2.tif:326: N-14	4093	5479	0.937	0.988	-0.094	-0.017	0.107	0.076462
14028	68-UNSEP1.gel-no Vit 4.tif:252: K-12	2289	6381	1.182	0.988	0.241	-0.018	-0.263	-0.258647
14089	68-UNSEP1.gel-no Vit 4.tif:313: N-1	2235	6380	1.154	0.988	0.207	-0.018	1.585	-0.22406
20408	97-UNSEP1.gel-no Vit 3.tif:248: K-8	3355	3545	1.032	0.988	0.045	-0.018	0	-0.06286
4156	126-UNSEP1-noVit-bot.tif:124: F-4	9067	6938	3.234	0.989	1.693	-0.015	0.17	-1.70928	activator
6017	138-UNSEP1.gel-no Vit 1.tif:305: M-17	3214	3397	1.119	0.989	0.162	-0.016	1.385	-0.178168
7006	143-UNSEP1.gel-no Vit 4.tif:286: L-22	5571	3677	1.077	0.989	0.107	-0.017	0.337	-0.122976
11655	161-UNSEP1.gel-no Vit 3.tif:231: J-15	2925	3040	1.243	0.989	0.314	-0.016	1.874	-0.329784
12423	163-UNSEP1.gel-no Vit 1.tif:327: N-15	2922	5611	1.022	0.989	0.031	-0.016	1.385	-0.0473528
12538	163REP2-UNSEP1.gel-no Vit 1.tif:106: E-10	7899	3089	1.41	0.989	0.495	-0.016	0.83	-0.511653
15318	77-UNSEP.gel-with Vit 1.tif:198: I-6	3889	1960	1.129	0.989	0.175	-0.016	0	-0.191003
15679	78-UNSEP1.gel-no Vit 6.tif:223: J-7	1538	5707	0.869	0.989	-0.203	-0.016	1.64	0.186614
18755	92-UNSEP1.gel-no Vit 5.tif:275: L-11	3316	3177	0.96	0.989	-0.058	-0.015	0.415	0.0429361
19746	95-UNSEP1.gel-no Vit 1.tif:258: K-18	1741	2793	0.815	0.989	-0.296	-0.016	0	0.27917
1983	118-UNSEP1.gel-no Vit 1.tif:303: M-15	2283	6172	1.248	0.99	0.319	-0.015	-0.222	-0.334118
3056	123-UNSEP1-noVit-top.tif:32: B-8	2665	7275	0.917	0.99	-0.125	-0.015	2.379	0.110507
3231	123-UNSEP1-noVit-top.tif:207: I-15	4115	7279	1.416	0.99	0.502	-0.014	1.737	-0.516321
4485	127-UNSEP1-noVit-top.tif:117: E-21	2643	8853	0.946	0.99	-0.08	-0.015	0.485	0.0655883
11306	160-UNSEP1.gel-no Vit 4.tif:218: J-2	3969	4447	1.106	0.99	0.145	-0.014	1.295	-0.159851
12674	163REP2-UNSEP1.gel-no Vit 1.tif:242: K-2	7373	3093	1.316	0.99	0.396	-0.014	1.585	-0.410659
15329	77-UNSEP.gel-with Vit 1.tif:209: I-17	6647	1963	1.929	0.99	0.948	-0.014	0	-0.962353
3909	125-UNSEP1-noVit-top.tif:213: I-21	3394	7981	0.926	0.991	-0.111	-0.013	1.254	0.0978729
7390	144-UNSEP1.gel-no Vit 3.tif:334: N-22	5585	5068	1.454	0.991	0.54	-0.013	0.234	-0.55307
7616	145-UNSEP1.gel-no Vit 2.tif:224: J-8	3610	5493	0.826	0.991	-0.275	-0.013	0.181	0.262743
7931	146-UNSEP1-noVit-top.tif:203: I-11	3490	9670	1	0.991	0.0002756	-0.013	-0.222	-0.013043
8368	150-UNSEP1.gel-no Vit 1.tif:304: M-16	1774	1554	1.014	0.991	0.02	-0.013	2	-0.0331007
16747	81-UNSEP1.gel-no Vit 3.tif:283: L-19	1976	4166	0.991	0.991	-0.013	-0.014	0	0
18256	91-UNSEP1.gel-no Vit 4.tif:112: E-16	3883	3841	1.214	0.991	0.28	-0.013	0	-0.292811
20108	96-UNSEP1.gel-no Vit 2.tif:284: L-20	3067	3725	1.077	0.991	0.107	-0.013	0	-0.120061
267	110-UNSEP1.gel-no Vit 6.tif:267: L-3	2019	6226	1.069	0.992	0.096	-0.011	0.29	-0.10785
3534	124-UNSEP1-noVit-bot.tif:174: H-6	2703	5069	0.737	0.992	-0.44	-0.012	1.495	0.428676
10954	159-UNSEP1.gel-no Vit 5.tif:202: I-10	2586	6190	0.819	0.992	-0.287	-0.012	1.399	0.276477
11342	160-UNSEP1.gel-no Vit 4.tif:254: K-14	3635	4453	1.013	0.992	0.019	-0.012	0.515	-0.0302221
19804	95-UNSEP1.gel-no Vit 1.tif:316: N-4	2139	2802	1.001	0.992	0.001	-0.012	-1	-0.0130299
3262	123-UNSEP1-noVit-top.tif:238: J-22	2875	7296	0.989	0.993	-0.015	-0.011	1.152	0.0058232
5299	129-UNSEP1-noVit-top.tif:259: K-19	3137	9750	0.92	0.993	-0.12	-0.01	1.708	0.11016
6125	141-UNSEP1.gel-no Vit 6.tif:77: D-5	4467	5722	1.68	0.993	0.748	-0.011	0.485	-0.758596
6330	141-UNSEP1.gel-no Vit 6.tif:282: L-18	2437	5723	0.917	0.993	-0.126	-0.01	0.415	0.114872
9998	156-UNSEP1.gel-no Vit 3.tif:254: K-14	1529	1522	0.925	0.993	-0.113	-0.011	-2	0.10234
11808	162-UNSEP1.gel-no Vit 2.tif:48: B-24	4870	4705	1.7	0.993	0.766	-0.011	0.678	-0.775669
12476	163REP2-UNSEP1.gel-no Vit 1.tif:44: B-20	5975	3100	1.066	0.993	0.093	-0.011	1.445	-0.102342
12574	163REP2-UNSEP1.gel-no Vit 1.tif:142: F-22	6197	3101	1.106	0.993	0.145	-0.01	1.248	-0.155486
13976	68-UNSEP1.gel-no Vit 4.tif:200: I-8	1820	6411	0.94	0.993	-0.089	-0.011	0	0.079133
17774	88-UNSEP1.gel-no Vit 2-1.tif:302: M-14	2589	4799	0.992	0.993	-0.012	-0.01	0.17	0.0014536
4698	127-UNSEP1-noVit-top.tif:330: N-18	2880	8888	1.031	0.994	0.044	-0.009	0	-0.0527266
6305	141-UNSEP1.gel-no Vit 6.tif:257: K-17	2349	5727	0.883	0.994	-0.179	-0.009	0.29	0.170832
7879	146-UNSEP1-noVit-top.tif:151: G-7	3451	9699	0.989	0.994	-0.016	-0.009	-0.193	0.00727533
12760	163REP2-UNSEP1.gel-no Vit 1.tif:328: N-16	6161	3105	1.099	0.994	0.137	-0.008	0.951	-0.144874
14026	68-UNSEP1.gel-no Vit 4.tif:250: K-10	2283	6421	1.179	0.994	0.238	-0.009	-0.263	-0.246246
17970	89-UNSEP1.gel-no Vit 3.tif:162: G-18	3147	3944	0.981	0.994	-0.028	-0.009	0.788	0.0189927
18083	89-UNSEP1.gel-no Vit 3.tif:275: L-11	3495	3943	1.089	0.994	0.124	-0.009	-0.263	-0.131686
2098	120-UNSEP1.gel-no Vit 1.tif:82: D-10	2366	5666	1.212	0.995	0.277	-0.007	0.778	-0.284621
2408	121-UNSEP1.gel-no Vit 2-1.tif:56: C-8	2090	9652	1.067	0.995	0.093	-0.007	-0.3	-0.100792
4557	127-UNSEP1-noVit-top.tif:189: H-21	2676	8902	0.958	0.995	-0.062	-0.007	0	0.0546709
5940	138-UNSEP1.gel-no Vit 1.tif:228: J-12	2013	3418	0.701	0.995	-0.513	-0.007	1.459	0.505282
12035	162-UNSEP1.gel-no Vit 2.tif:275: L-11	3752	4717	1.31	0.995	0.389	-0.007	0.778	-0.396798
12253	163-UNSEP1.gel-no Vit 1.tif:157: G-13	2651	5643	0.927	0.995	-0.11	-0.008	0.415	0.102127
15350	77-UNSEP.gel-with Vit 1.tif:230: J-14	3574	1973	1.037	0.995	0.053	-0.007	0	-0.0596475
15777	78-UNSEP1.gel-no Vit 6.tif:321: N-9	2011	5744	1.136	0.995	0.184	-0.007	-0.115	-0.191194
2431	121-UNSEP1.gel-no Vit 2-1.tif:79: D-7	2240	9653	1.143	0.996	0.193	-0.006	-0.107	-0.198608
7157	144-UNSEP1.gel-no Vit 3.tif:101: E-5	3241	5094	0.844	0.996	-0.245	-0.006	0	0.238903
7202	144-UNSEP1.gel-no Vit 3.tif:146: G-2	4434	5096	1.154	0.996	0.207	-0.005	-0.087	-0.212426
12516	163REP2-UNSEP1.gel-no Vit 1.tif:84: D-12	6830	3111	1.219	0.996	0.285	-0.005	1.115	-0.29148
12632	163REP2-UNSEP1.gel-no Vit 1.tif:200: I-8	8645	3109	1.543	0.996	0.625	-0.006	0.84	-0.63152
12882	166-UNSEP1.gel-no Vit 4.tif:114: E-18	3052	5987	0.705	0.996	-0.505	-0.006	0.241	0.498522
15387	77-UNSEP.gel-with Vit 1.tif:267: L-3	4839	1974	1.405	0.996	0.49	-0.006	0.193	-0.496352
15524	78-UNSEP1.gel-no Vit 6.tif:68: C-20	2371	5745	1.339	0.996	0.421	-0.006	0	-0.426938
18263	91-UNSEP1.gel-no Vit 4.tif:119: E-23	4028	3859	1.26	0.996	0.333	-0.006	2.441	-0.339206
5207	129-UNSEP1-noVit-top.tif:167: G-23	3819	9782	1.12	0.997	0.164	-0.005	1.17	-0.167833
6382	141-UNSEP1.gel-no Vit 6.tif:334: N-22	3717	5749	1.398	0.997	0.483	-0.004	0.252	-0.487699
7599	145-UNSEP1.gel-no Vit 2.tif:207: I-15	4365	5528	0.999	0.997	-0.001	-0.004	0.222	-0.00289117
8023	146-UNSEP1-noVit-top.tif:295: M-7	3023	9726	0.866	0.997	-0.207	-0.005	-0.138	0.203226
8871	152-UNSEP1.gel-no Vit 3.tif:135: F-15	1580	1834	1.062	0.997	0.087	-0.004	-0.241	-0.0911184
11398	160-UNSEP1.gel-no Vit 4.tif:310: M-22	3506	4478	0.977	0.997	-0.034	-0.004	0.276	0.0292349
12761	163REP2-UNSEP1.gel-no Vit 1.tif:329: N-17	6533	3113	1.166	0.997	0.221	-0.005	0.907	-0.225902
320	110-UNSEP1.gel-no Vit 6.tif:320: N-8	1715	6261	0.908	0.998	-0.139	-0.003	0	0.136348
578	111-UNSEP1.gel-no Vit 5.tif:242: K-2	2024	5149	1.055	0.998	0.078	-0.003	-0.222	-0.0801313
4263	126-UNSEP1-noVit-bot.tif:231: J-15	2148	7001	0.766	0.998	-0.384	-0.002	0.692	0.381695
4860	128-UNSEP1-noVit-bot.tif:156: G-12	3119	8017	0.873	0.998	-0.196	-0.003	1.459	0.193058
5370	129-UNSEP1-noVit-top.tif:330: N-18	3031	9794	0.889	0.998	-0.17	-0.003	0	0.166856
8328	150-UNSEP1.gel-no Vit 1.tif:264: K-24	2057	1565	1.176	0.998	0.234	-0.003	2.17	-0.236776
9403	153-UNSEP1.gel-no Vit 4.tif:331: N-19	1756	1821	1.229	0.998	0.297	-0.004	-0.152	-0.300373
9681	155-UNSEP1.gel-no Vit 5.tif:273: L-9	1433	1744	0.988	0.998	-0.017	-0.004	-1.17	0.0145288
16111	79-UNSEP1.gel-no Vit 5.tif:319: N-7	2220	4133	0.961	0.998	-0.058	-0.004	0	0.0545034
5174	129-UNSEP1-noVit-top.tif:134: F-14	3378	9804	0.991	0.999	-0.013	-0.002	1.794	0.0115996
7712	145-UNSEP1.gel-no Vit 2.tif:320: N-8	4060	5541	0.929	0.999	-0.106	-0.0007809	0.082	0.104806
7901	146-UNSEP1-noVit-top.tif:173: H-5	2840	9749	0.814	0.999	-0.297	-0.002	0.807	0.295456
8017	146-UNSEP1-noVit-top.tif:289: M-1	2970	9747	0.851	0.999	-0.232	-0.002	0.348	0.231326
9377	153-UNSEP1.gel-no Vit 4.tif:305: M-17	1516	1823	1.061	0.999	0.085	-0.002	-0.652	-0.0868681
10266	158-UNSEP1.gel-no Vit 2.tif:186: H-18	1248	1896	0.814	0.999	-0.296	-0.001	-0.348	0.295456
12624	163REP2-UNSEP1.gel-no Vit 1.tif:192: H-24	6266	3119	1.118	0.999	0.161	-0.002	1.193	-0.162364
3359	123-UNSEP1-noVit-top.tif:335: N-23	3080	7351	1.06	1	0.084	0.0003108	1.152	-0.0840643
4400	127-UNSEP1-noVit-top.tif:32: B-8	3094	8945	1.108	1	0.148	0.0002957	1.617	-0.147958
4790	128-UNSEP1-noVit-bot.tif:86: D-14	3562	8032	0.997	1	-0.004	0.0001647	0.71	0.00433459
6010	138-UNSEP1.gel-no Vit 1.tif:298: M-10	2704	3436	0.942	1	-0.087	0.00021	1.503	0.086201
9306	153-UNSEP1.gel-no Vit 4.tif:234: J-18	1553	1826	1.087	1	0.12	0.0003951	-0.585	-0.120352
13568	168-UNSEP1.gel-no Vit 2.tif:128: F-8	2311	6259	0.927	1	-0.109	-0.0003649	0.716	0.109359
1935	118-UNSEP1.gel-no Vit 1.tif:255: K-15	1833	6244	1.002	1.001	0.002	0.002	1.663	-0.00144053
5556	130-UNSEP1-noVit-bot.tif:180: H-12	3284	8452	0.911	1.001	-0.134	0.001	0.181	0.135919
12129	163-UNSEP1.gel-no Vit 1.tif:33: B-9	2769	5678	0.968	1.001	-0.047	0.0009743	0.415	0.048363
12492	163REP2-UNSEP1.gel-no Vit 1.tif:60: C-12	7493	3127	1.337	1.001	0.419	0.002	1.138	-0.417557
19910	96-UNSEP1.gel-no Vit 2.tif:86: D-14	3097	3763	1.087	1.001	0.121	0.001	-0.415	-0.11891
728	113-UNSEP1.gel-no Vit 4.tif:56: C-8	1869	6724	0.969	1.002	-0.045	0.002	1.485	0.0483139
2150	120-UNSEP1.gel-no Vit 1.tif:134: F-14	2123	5707	1.087	1.002	0.121	0.004	0	-0.117469
3296	123-UNSEP1-noVit-top.tif:272: L-8	2521	7364	0.868	1.002	-0.205	0.003	0	0.207116
7291	144-UNSEP1.gel-no Vit 3.tif:235: J-19	3470	5126	0.903	1.002	-0.147	0.003	0.222	0.150085
11407	160-UNSEP1.gel-no Vit 4.tif:319: N-7	4566	4500	1.272	1.002	0.348	0.003	1.031	-0.344216
12982	166-UNSEP1.gel-no Vit 4.tif:214: I-22	5176	6022	1.195	1.002	0.257	0.003	1.907	-0.254128
13487	168-UNSEP1.gel-no Vit 2.tif:47: B-23	2560	6276	1.027	1.002	0.038	0.004	0.064	-0.0355537
5308	129-UNSEP1-noVit-top.tif:268: L-4	4456	9847	1.307	1.003	0.386	0.005	1.459	-0.381938
6180	141-UNSEP1.gel-no Vit 6.tif:132: F-12	2618	5781	0.985	1.003	-0.022	0.004	0.322	0.026126
9657	155-UNSEP1.gel-no Vit 5.tif:249: K-9	1443	1754	0.995	1.003	-0.007	0.005	-0.737	0.0115532
9776	156-UNSEP1.gel-no Vit 3.tif:32: B-8	1459	1538	0.882	1.003	-0.181	0.005	-4.322	0.185471
18112	89-UNSEP1.gel-no Vit 3.tif:304: M-16	3225	3978	1.005	1.003	0.008	0.004	-0.737	-0.0028739
5554	130-UNSEP1-noVit-bot.tif:178: H-10	2904	8479	0.806	1.004	-0.312	0.006	0.193	0.316908
5674	130-UNSEP1-noVit-bot.tif:298: M-10	2727	8482	0.757	1.004	-0.403	0.006	1.042	0.407394
7386	144-UNSEP1.gel-no Vit 3.tif:330: N-18	4766	5137	1.241	1.004	0.311	0.006	0.322	-0.305744
8600	151-UNSEP1.gel-no Vit 2-1.tif:200: I-8	1441	1460	0.977	1.004	-0.033	0.006	1	0.0393288
9235	153-UNSEP1.gel-no Vit 4.tif:163: G-19	1538	1832	1.076	1.004	0.106	0.005	-0.222	-0.0999188
9351	153-UNSEP1.gel-no Vit 4.tif:279: L-15	1602	1833	1.121	1.004	0.165	0.006	-3	-0.159027
11307	160-UNSEP1.gel-no Vit 4.tif:219: J-3	5463	4510	1.522	1.004	0.606	0.006	1.862	-0.600209
12133	163-UNSEP1.gel-no Vit 1.tif:37: B-13	6391	5698	2.234	1.004	1.16	0.006	0.874	-1.15387	activator
13415	167-UNSEP1.gel-no Vit 3.tif:311: M-23	2355	7349	0.871	1.004	-0.2	0.005	1.921	0.205015
14773	74-UNSEP1.gel-no Vit 3.tif:325: N-13	2185	5232	1.199	1.004	0.262	0.006	0	-0.256072
15211	77-UNSEP.gel-with Vit 1.tif:91: D-19	5093	1990	1.478	1.004	0.564	0.006	0	-0.557887
15367	77-UNSEP.gel-with Vit 1.tif:247: K-7	3855	1990	1.119	1.004	0.162	0.006	0	-0.156451
19952	96-UNSEP1.gel-no Vit 2.tif:128: F-8	3069	3774	1.078	1.004	0.108	0.005	0	-0.102598
7222	144-UNSEP1.gel-no Vit 3.tif:166: G-22	4282	5142	1.115	1.005	0.157	0.008	0.16	-0.149848
13928	68-UNSEP1.gel-no Vit 4.tif:152: G-8	2078	6494	1.073	1.005	0.102	0.008	-0.222	-0.0944546
14009	68-UNSEP1.gel-no Vit 4.tif:233: J-17	2159	6494	1.115	1.005	0.157	0.008	-0.485	-0.149848
16072	79-UNSEP1.gel-no Vit 5.tif:280: L-16	2399	4164	1.038	1.005	0.054	0.007	0	-0.0466109
17542	88-UNSEP1.gel-no Vit 2-1.tif:70: C-22	1980	4856	0.758	1.005	-0.399	0.007	0.459	0.406926
20005	96-UNSEP1.gel-no Vit 2.tif:181: H-13	3137	3778	1.101	1.005	0.139	0.007	-0.322	-0.131619
2121	120-UNSEP1.gel-no Vit 1.tif:105: E-9	2400	5728	1.229	1.006	0.298	0.009	0	-0.288855
4875	128-UNSEP1-noVit-bot.tif:171: H-3	3101	8079	0.868	1.006	-0.204	0.009	0.263	0.212863
9706	155-UNSEP1.gel-no Vit 5.tif:298: M-10	1458	1758	1.005	1.006	0.008	0.008	-0.152	0.0014348
12269	163-UNSEP1.gel-no Vit 1.tif:173: H-5	2611	5711	0.913	1.006	-0.132	0.009	0.248	0.139944
12446	163REP2-UNSEP1.gel-no Vit 1.tif:14: A-14	6839	3142	1.22	1.006	0.287	0.009	1.922	-0.278251
12813	166-UNSEP1.gel-no Vit 4.tif:45: B-21	4217	6044	0.974	1.006	-0.038	0.008	0.585	0.0466366
12852	166-UNSEP1.gel-no Vit 4.tif:84: D-12	4309	6047	0.995	1.006	-0.007	0.009	0.485	0.0158619
13924	68-UNSEP1.gel-no Vit 4.tif:148: G-4	1897	6498	0.98	1.006	-0.03	0.009	-0.415	0.0377767
14717	74-UNSEP1.gel-no Vit 3.tif:269: L-5	1637	5245	0.898	1.006	-0.155	0.009	0.1	0.163843
15215	77-UNSEP.gel-with Vit 1.tif:95: D-23	5341	1994	1.55	1.006	0.633	0.009	-0.152	-0.623638
510	111-UNSEP1.gel-no Vit 5.tif:174: H-6	1772	5194	0.924	1.007	-0.114	0.01	0.807	0.124099
5423	130-UNSEP1-noVit-bot.tif:47: B-23	5133	8505	1.424	1.007	0.51	0.01	0.893	-0.499885
7494	145-UNSEP1.gel-no Vit 2.tif:102: E-6	4268	5581	0.977	1.007	-0.034	0.01	0.755	0.0436332
7789	146-UNSEP1-noVit-top.tif:61: C-13	3198	9825	0.917	1.007	-0.126	0.01	0.459	0.13507
8200	150-UNSEP1.gel-no Vit 1.tif:136: F-16	1797	1580	1.027	1.007	0.039	0.011	3.907	-0.0283725
9233	153-UNSEP1.gel-no Vit 4.tif:161: G-17	1590	1838	1.113	1.007	0.154	0.01	-0.459	-0.14439
13285	167-UNSEP1.gel-no Vit 3.tif:181: H-13	2617	7376	0.968	1.007	-0.047	0.01	1.848	0.0569847
19755	95-UNSEP1.gel-no Vit 1.tif:267: L-3	2167	2843	1.014	1.007	0.02	0.009	-1	-0.00999397
2078	120-UNSEP1.gel-no Vit 1.tif:62: C-14	2057	5738	1.054	1.008	0.075	0.011	0	-0.0643792
2385	121-UNSEP1.gel-no Vit 2-1.tif:33: B-9	2133	9770	1.089	1.008	0.123	0.011	0.29	-0.111508
7142	144-UNSEP1.gel-no Vit 3.tif:86: D-14	3512	5157	0.914	1.008	-0.129	0.012	0.078	0.14123
12733	163REP2-UNSEP1.gel-no Vit 1.tif:301: M-13	8029	3148	1.433	1.008	0.519	0.012	0.392	-0.507543
8004	146-UNSEP1-noVit-top.tif:276: L-12	3316	9851	0.95	1.009	-0.074	0.013	0.585	0.0869268
8296	150-UNSEP1.gel-no Vit 1.tif:232: J-16	1727	1582	0.987	1.009	-0.018	0.012	2.322	0.0318042
12196	163-UNSEP1.gel-no Vit 1.tif:100: E-4	2819	5724	0.986	1.009	-0.021	0.013	0.305	0.0332666
12742	163REP2-UNSEP1.gel-no Vit 1.tif:310: M-22	5886	3151	1.05	1.009	0.071	0.013	0.617	-0.0574632
17782	88-UNSEP1.gel-no Vit 2-1.tif:310: M-22	2337	4878	0.895	1.009	-0.16	0.014	0.737	0.172967
20811	98-UNSEP1.gel-no Vit 4.tif:315: N-3	3512	2713	1.156	1.009	0.209	0.013	1	-0.196215
5190	129-UNSEP1-noVit-top.tif:150: G-6	3538	9910	1.038	1.01	0.053	0.014	0.652	-0.0394512
7049	143-UNSEP1.gel-no Vit 4.tif:329: N-17	5608	3756	1.084	1.01	0.116	0.014	0.252	-0.102009
18229	91-UNSEP1.gel-no Vit 4.tif:85: D-13	3059	3913	0.957	1.01	-0.064	0.014	-0.17	0.0777645
9062	152-UNSEP1.gel-no Vit 3.tif:326: N-14	1633	1859	1.098	1.011	0.135	0.015	0	-0.119095
9282	153-UNSEP1.gel-no Vit 4.tif:210: I-18	1605	1845	1.123	1.011	0.167	0.015	-0.737	-0.151575
11015	159-UNSEP1.gel-no Vit 5.tif:263: K-23	2931	6307	0.929	1.011	-0.107	0.015	1	0.122032
11901	162-UNSEP1.gel-no Vit 2.tif:141: F-21	2656	4791	0.927	1.011	-0.109	0.015	0.284	0.125142
12708	163REP2-UNSEP1.gel-no Vit 1.tif:276: L-12	9160	3158	1.635	1.011	0.709	0.016	0.248	-0.693508
15328	77-UNSEP.gel-with Vit 1.tif:208: I-16	4911	2003	1.425	1.011	0.511	0.015	0.652	-0.495179
17789	88-UNSEP1.gel-no Vit 2-1.tif:317: N-5	2513	4888	0.962	1.011	-0.055	0.016	0.17	0.0716742
7338	144-UNSEP1.gel-no Vit 3.tif:282: L-18	4224	5178	1.1	1.012	0.137	0.018	0.082	-0.120294
7668	145-UNSEP1.gel-no Vit 2.tif:276: L-12	3504	5610	0.802	1.012	-0.318	0.017	0.222	0.335535
9228	153-UNSEP1.gel-no Vit 4.tif:156: G-12	1668	1848	1.167	1.012	0.223	0.018	-0.515	-0.205595
10991	159-UNSEP1.gel-no Vit 5.tif:239: J-23	2825	6314	0.895	1.012	-0.16	0.017	1.054	0.17725
11635	161-UNSEP1.gel-no Vit 3.tif:211: I-19	2187	3113	0.93	1.012	-0.105	0.018	2.277	0.121907
12037	162-UNSEP1.gel-no Vit 2.tif:277: L-13	3591	4796	1.254	1.012	0.326	0.017	0.628	-0.309328
13528	168-UNSEP1.gel-no Vit 2.tif:88: D-16	2695	6337	1.081	1.012	0.112	0.018	0.248	-0.0951572
13982	68-UNSEP1.gel-no Vit 4.tif:206: I-14	1938	6535	1.001	1.012	0.001	0.017	-0.193	0.0157673
19974	96-UNSEP1.gel-no Vit 2.tif:150: G-6	3109	3806	1.092	1.012	0.127	0.018	-0.485	-0.109764
780	113-UNSEP1.gel-no Vit 4.tif:108: E-12	1805	6798	0.936	1.013	-0.095	0.018	1.206	0.114054
4157	126-UNSEP1-noVit-bot.tif:125: F-5	2553	7103	0.911	1.013	-0.135	0.019	0.485	0.153111
6918	143-UNSEP1.gel-no Vit 4.tif:198: I-6	4047	3769	0.782	1.013	-0.354	0.019	1.115	0.373394
8466	151-UNSEP1.gel-no Vit 2-1.tif:66: C-18	1609	1473	1.091	1.013	0.126	0.019	1.585	-0.107017
9993	156-UNSEP1.gel-no Vit 3.tif:249: K-9	1511	1553	0.914	1.013	-0.13	0.019	-2.322	0.148368
10644	159-2-UNSEP1.gel-no Vit 1.tif:228: J-12	1635	1569	1.178	1.013	0.236	0.019	-3	-0.217705
11993	162-UNSEP1.gel-no Vit 2.tif:233: J-17	2484	4801	0.867	1.013	-0.206	0.018	0.28	0.22453
12228	163-UNSEP1.gel-no Vit 1.tif:132: F-12	3237	5746	1.132	1.013	0.178	0.018	0.692	-0.16024
3139	123-UNSEP1-noVit-top.tif:115: E-19	2996	7453	1.031	1.014	0.044	0.02	0.678	-0.0239867
6117	141-UNSEP1.gel-no Vit 6.tif:69: C-21	3356	5844	1.262	1.014	0.336	0.02	0.222	-0.315654
7377	144-UNSEP1.gel-no Vit 3.tif:321: N-9	3832	5188	0.998	1.014	-0.003	0.021	0.415	0.0229459
7479	145-UNSEP1.gel-no Vit 2.tif:87: D-15	4283	5623	0.98	1.014	-0.029	0.02	0	0.049204
9021	152-UNSEP1.gel-no Vit 3.tif:285: L-21	1591	1865	1.07	1.014	0.097	0.02	0.107	-0.0775531
12527	163REP2-UNSEP1.gel-no Vit 1.tif:95: D-23	7228	3167	1.29	1.014	0.367	0.02	1.387	-0.347313
15208	77-UNSEP.gel-with Vit 1.tif:88: D-16	4931	2009	1.431	1.014	0.517	0.02	0	-0.496966
1761	118-UNSEP1.gel-no Vit 1.tif:81: D-9	1836	6328	1.003	1.015	0.005	0.021	0.193	0.0171581
1961	118-UNSEP1.gel-no Vit 1.tif:281: L-17	1762	6329	0.963	1.015	-0.055	0.021	1.152	0.075872
3967	125-UNSEP1-noVit-top.tif:271: L-7	3922	8176	1.07	1.015	0.098	0.022	0	-0.0761311
6238	141-UNSEP1.gel-no Vit 6.tif:190: H-22	2698	5853	1.015	1.015	0.021	0.022	0.181	0
8627	151-UNSEP1.gel-no Vit 2-1.tif:227: J-11	1483	1475	1.006	1.015	0.009	0.021	3	0.0128494
19467	94-UNSEP1.gel-no Vit 1.tif:315: N-3	2168	5924	1.121	1.015	0.165	0.021	-0.17	-0.143307
19907	96-UNSEP1.gel-no Vit 2.tif:83: D-11	3196	3818	1.122	1.015	0.166	0.022	0	-0.144593
20028	96-UNSEP1.gel-no Vit 2.tif:204: I-12	3174	3815	1.114	1.015	0.156	0.021	0	-0.13427
3344	123-UNSEP1-noVit-top.tif:320: N-8	3506	7466	1.207	1.016	0.271	0.023	1.524	-0.248525
5924	138-UNSEP1.gel-no Vit 1.tif:212: I-20	2090	3490	0.728	1.016	-0.459	0.023	1.1	0.48089
8945	152-UNSEP1.gel-no Vit 3.tif:209: I-17	1632	1868	1.097	1.016	0.134	0.022	-0.415	-0.110663
9181	153-UNSEP1.gel-no Vit 4.tif:109: E-13	1572	1855	1.1	1.016	0.138	0.023	-0.241	-0.114603
9357	153-UNSEP1.gel-no Vit 4.tif:285: L-21	1635	1854	1.144	1.016	0.194	0.022	-0.585	-0.171187
12596	163REP2-UNSEP1.gel-no Vit 1.tif:164: G-20	8086	3172	1.443	1.016	0.529	0.023	0.858	-0.506171
13207	167-UNSEP1.gel-no Vit 3.tif:103: E-7	3302	7441	1.221	1.016	0.288	0.023	2	-0.265163
20748	98-UNSEP1.gel-no Vit 4.tif:252: K-12	2717	2733	0.894	1.016	-0.162	0.023	2.684	0.184554
9334	153-UNSEP1.gel-no Vit 4.tif:262: K-22	1609	1856	1.126	1.017	0.171	0.024	0	-0.146887
15098	76-UNSEP1.gel-no Vit 2.tif:314: N-2	1920	5461	1.359	1.017	0.443	0.025	0	-0.418226
16569	81-UNSEP1.gel-no Vit 3.tif:105: E-9	2310	4276	1.158	1.017	0.212	0.024	1.193	-0.187316
20100	96-UNSEP1.gel-no Vit 2.tif:276: L-12	3043	3823	1.068	1.017	0.096	0.024	0	-0.070592
3245	123-UNSEP1-noVit-top.tif:221: J-5	2286	7483	0.787	1.018	-0.346	0.026	0.585	0.371302
4679	127-UNSEP1-noVit-top.tif:311: M-23	5103	9101	1.827	1.018	0.87	0.025	1.138	-0.843739
8731	151-UNSEP1.gel-no Vit 2-1.tif:331: N-19	1575	1480	1.068	1.018	0.095	0.026	6.229	-0.0691741
18089	89-UNSEP1.gel-no Vit 3.tif:281: L-17	3518	4037	1.097	1.018	0.133	0.025	0.222	-0.107826
9045	152-UNSEP1.gel-no Vit 3.tif:309: M-21	1633	1874	1.098	1.019	0.135	0.027	-0.126	-0.107724
9368	153-UNSEP1.gel-no Vit 4.tif:296: M-8	1445	1860	1.011	1.019	0.016	0.027	-2.459	0.0113711
12451	163REP2-UNSEP1.gel-no Vit 1.tif:19: A-19	6937	3182	1.238	1.019	0.308	0.027	1.415	-0.280857
12589	163REP2-UNSEP1.gel-no Vit 1.tif:157: G-13	8030	3182	1.433	1.019	0.519	0.027	0.29	-0.491885
12668	163REP2-UNSEP1.gel-no Vit 1.tif:236: J-20	8002	3183	1.428	1.019	0.514	0.028	0.585	-0.486842
20063	96-UNSEP1.gel-no Vit 2.tif:239: J-23	3077	3830	1.08	1.019	0.112	0.027	2	-0.0838773
4407	127-UNSEP1-noVit-top.tif:39: B-15	2856	9120	1.023	1.02	0.032	0.028	0	-0.00423699
4410	127-UNSEP1-noVit-top.tif:42: B-18	2482	9125	0.889	1.02	-0.17	0.029	0.848	0.198314
12382	163-UNSEP1.gel-no Vit 1.tif:286: L-22	3912	5788	1.368	1.02	0.452	0.029	0.837	-0.423499
13808	68-UNSEP1.gel-no Vit 4.tif:32: B-8	2015	6590	1.041	1.02	0.057	0.029	0	-0.0294009
14047	68-UNSEP1.gel-no Vit 4.tif:271: L-7	1922	6591	0.993	1.02	-0.011	0.029	0	0.0387035
15375	77-UNSEP.gel-with Vit 1.tif:255: K-15	4520	2021	1.312	1.02	0.392	0.028	0	-0.363199
15378	77-UNSEP.gel-with Vit 1.tif:258: K-18	4385	2021	1.273	1.02	0.348	0.028	0	-0.319663
4857	128-UNSEP1-noVit-bot.tif:153: G-9	3503	8200	0.981	1.021	-0.028	0.03	0.241	0.0576578
7401	145-UNSEP1.gel-no Vit 2.tif:9: A-9	6560	5658	1.502	1.021	0.587	0.029	0.322	-0.556902
7773	146-UNSEP1-noVit-top.tif:45: B-21	3592	9969	1.029	1.021	0.042	0.031	-0.1	-0.0112601
8362	150-UNSEP1.gel-no Vit 1.tif:298: M-10	1509	1602	0.863	1.021	-0.213	0.031	0.322	0.24255
9209	153-UNSEP1.gel-no Vit 4.tif:137: F-17	1683	1864	1.178	1.021	0.236	0.03	0	-0.206357
9215	153-UNSEP1.gel-no Vit 4.tif:143: F-23	1646	1864	1.152	1.021	0.204	0.03	-0.485	-0.174158
11968	162-UNSEP1.gel-no Vit 2.tif:208: I-16	2712	4838	0.947	1.021	-0.079	0.029	0.28	0.108547
12094	162-UNSEP1.gel-no Vit 2.tif:334: N-22	3024	4840	1.056	1.021	0.078	0.03	0.308	-0.048627
12330	163-UNSEP1.gel-no Vit 1.tif:234: J-18	3010	5792	1.052	1.021	0.074	0.03	0.3	-0.0431518
13384	167-UNSEP1.gel-no Vit 3.tif:280: L-16	2984	7476	1.103	1.021	0.142	0.03	1.07	-0.11145
13503	168-UNSEP1.gel-no Vit 2.tif:63: C-15	3203	6395	1.285	1.021	0.362	0.031	1.087	-0.331785
18801	92-UNSEP1.gel-no Vit 5.tif:321: N-9	3875	3278	1.122	1.021	0.166	0.03	0	-0.13609
7385	144-UNSEP1.gel-no Vit 3.tif:329: N-17	3687	5226	0.96	1.022	-0.059	0.031	0.087	0.0902889
7552	145-UNSEP1.gel-no Vit 2.tif:160: G-16	3948	5667	0.904	1.022	-0.146	0.032	0.115	0.177001
7621	145-UNSEP1.gel-no Vit 2.tif:229: J-13	3412	5665	0.781	1.022	-0.357	0.031	0	0.388001
12175	163-UNSEP1.gel-no Vit 1.tif:79: D-7	3190	5797	1.115	1.022	0.157	0.031	1.404	-0.125649
12544	163REP2-UNSEP1.gel-no Vit 1.tif:112: E-16	7687	3193	1.372	1.022	0.456	0.032	0.862	-0.424885
15038	76-UNSEP1.gel-no Vit 2.tif:254: K-14	1402	5485	0.993	1.022	-0.011	0.031	0.193	0.0415296
15052	76-UNSEP1.gel-no Vit 2.tif:268: L-4	1756	5485	1.243	1.022	0.314	0.031	0	-0.282431
15403	77-UNSEP.gel-with Vit 1.tif:283: L-19	4730	2025	1.373	1.022	0.457	0.031	0	-0.425936
16075	79-UNSEP1.gel-no Vit 5.tif:283: L-19	2134	4235	0.924	1.022	-0.115	0.032	0	0.14543
18110	89-UNSEP1.gel-no Vit 3.tif:302: M-14	3434	4056	1.07	1.022	0.098	0.032	0.222	-0.0662156
4265	126-UNSEP1-noVit-bot.tif:233: J-17	2194	7175	0.783	1.023	-0.354	0.033	1	0.385722
5415	130-UNSEP1-noVit-bot.tif:39: B-15	3804	8636	1.055	1.023	0.078	0.032	0.9	-0.0444369
5578	130-UNSEP1-noVit-bot.tif:202: I-10	2741	8640	0.76	1.023	-0.395	0.033	0.794	0.428735
5596	130-UNSEP1-noVit-bot.tif:220: J-4	3307	8635	0.917	1.023	-0.124	0.032	0.087	0.157813
6635	142-UNSEP1.gel-no Vit 5.tif:251: K-11	4005	4366	0.959	1.023	-0.061	0.033	0.678	0.0932034
7337	144-UNSEP1.gel-no Vit 3.tif:281: L-17	3942	5234	1.026	1.023	0.037	0.033	0.107	-0.00422459
16459	80-UNSEP1.gel-no Vit 4.tif:331: N-19	2087	5613	1.008	1.023	0.012	0.033	-0.126	0.0213105
19871	96-UNSEP1.gel-no Vit 2.tif:47: B-23	3068	3846	1.077	1.023	0.107	0.033	1.585	-0.0742121
2268	120-UNSEP1.gel-no Vit 1.tif:252: K-12	1834	5832	0.939	1.024	-0.09	0.035	0.447	0.125019
5550	130-UNSEP1-noVit-bot.tif:174: H-6	3085	8647	0.856	1.024	-0.225	0.034	0.778	0.258533
6286	141-UNSEP1.gel-no Vit 6.tif:238: J-22	2582	5904	0.971	1.024	-0.042	0.035	0.1	0.0766725
8679	151-UNSEP1.gel-no Vit 2-1.tif:279: L-15	1549	1488	1.051	1.024	0.071	0.034	2.138	-0.037547
12755	163REP2-UNSEP1.gel-no Vit 1.tif:323: N-11	7231	3198	1.29	1.024	0.368	0.034	0.459	-0.333155
15264	77-UNSEP.gel-with Vit 1.tif:144: F-24	6095	2030	1.769	1.024	0.823	0.035	0	-0.788718
3050	123-UNSEP1-noVit-top.tif:26: B-2	10229	7531	3.52	1.025	1.816	0.035	1.385	-1.77995	activator
7662	145-UNSEP1.gel-no Vit 2.tif:270: L-6	3641	5684	0.833	1.025	-0.263	0.036	0.087	0.299236
8730	151-UNSEP1.gel-no Vit 2-1.tif:330: N-18	1446	1490	0.981	1.025	-0.028	0.036	2.1	0.0632989
10379	158-UNSEP1.gel-no Vit 2.tif:299: M-11	1622	1944	1.058	1.025	0.082	0.035	-1.17	-0.0457157
10774	159-UNSEP1.gel-no Vit 5.tif:22: A-22	2749	6395	0.871	1.025	-0.199	0.035	0.392	0.234879
13302	167-UNSEP1.gel-no Vit 3.tif:198: I-6	3175	7507	1.174	1.025	0.231	0.036	1.933	-0.195808
16128	79-UNSEP1.gel-no Vit 5.tif:336: N-24	2003	4247	0.867	1.025	-0.206	0.036	0	0.24152
16354	80-UNSEP1.gel-no Vit 4.tif:226: J-10	1922	5625	0.929	1.025	-0.107	0.036	0.441	0.141873
5084	129-UNSEP1-noVit-top.tif:44: B-20	3127	10069	0.917	1.026	-0.125	0.037	0.7	0.162037
7938	146-UNSEP1-noVit-top.tif:210: I-18	3608	10012	1.034	1.026	0.048	0.037	0	-0.0112055
11712	161-UNSEP1.gel-no Vit 3.tif:288: L-24	2534	3154	1.077	1.026	0.107	0.037	2	-0.0699875
12257	163-UNSEP1.gel-no Vit 1.tif:161: G-17	2807	5820	0.981	1.026	-0.027	0.037	0.547	0.0647057
13103	166-UNSEP1.gel-no Vit 4.tif:335: N-23	4400	6169	1.016	1.026	0.023	0.038	0.71	0.0141303
17001	84-UNSEP1.gel-no Vit 2.tif:201: I-9	2302	5927	1.187	1.026	0.247	0.037	1.527	-0.210289
1949	118-UNSEP1.gel-no Vit 1.tif:269: L-5	1903	6402	1.04	1.027	0.056	0.038	0	-0.0181473
4435	127-UNSEP1-noVit-top.tif:67: C-19	2362	9183	0.846	1.027	-0.242	0.038	0.628	0.279707
5317	129-UNSEP1-noVit-top.tif:277: L-13	2864	10082	0.84	1.027	-0.251	0.039	0.126	0.289975
5495	130-UNSEP1-noVit-bot.tif:119: E-23	3704	8673	1.028	1.027	0.039	0.039	1	-0.00140408
7985	146-UNSEP1-noVit-top.tif:257: K-17	6955	10022	1.993	1.027	0.995	0.038	0.893	-0.956506
9400	153-UNSEP1.gel-no Vit 4.tif:328: N-16	1527	1875	1.069	1.027	0.096	0.039	-0.848	-0.0578257
11564	161-UNSEP1.gel-no Vit 3.tif:140: F-20	3519	3157	1.496	1.027	0.581	0.038	1.7	-0.542674
11697	161-UNSEP1.gel-no Vit 3.tif:273: L-9	1936	3157	0.823	1.027	-0.281	0.038	1.737	0.319472
14216	70-UNSEP1.gel-no Vit 4.tif:104: E-8	1814	5049	0.912	1.027	-0.134	0.038	0	0.17133
16764	81-UNSEP1.gel-no Vit 3.tif:300: M-12	2738	4317	1.373	1.027	0.457	0.038	0.415	-0.418895
19959	96-UNSEP1.gel-no Vit 2.tif:135: F-15	3370	3861	1.183	1.027	0.243	0.038	0.415	-0.204014
2279	120-UNSEP1.gel-no Vit 1.tif:263: K-23	1758	5850	0.9	1.028	-0.151	0.039	1	0.191843
3905	125-UNSEP1-noVit-top.tif:209: I-17	6792	8276	1.853	1.028	0.89	0.04	0.918	-0.850023
7476	145-UNSEP1.gel-no Vit 2.tif:84: D-12	3659	5699	0.838	1.028	-0.256	0.04	0.241	0.294818
12014	162-UNSEP1.gel-no Vit 2.tif:254: K-14	2692	4873	0.94	1.028	-0.09	0.04	1	0.129108
13535	168-UNSEP1.gel-no Vit 2.tif:95: D-23	2351	6436	0.943	1.028	-0.085	0.04	0.144	0.124511
14441	70-UNSEP1.gel-no Vit 4.tif:329: N-17	1994	5053	1.002	1.028	0.003	0.039	0	0.0369578
7306	144-UNSEP1.gel-no Vit 3.tif:250: K-10	3487	5261	0.908	1.029	-0.14	0.041	0	0.180479
12475	163REP2-UNSEP1.gel-no Vit 1.tif:43: B-19	5603	3214	1	1.029	-0.0002146	0.042	1.074	0.041243
12691	163REP2-UNSEP1.gel-no Vit 1.tif:259: K-19	8539	3213	1.524	1.029	0.608	0.041	0.874	-0.56662
591	111-UNSEP1.gel-no Vit 5.tif:255: K-15	2109	5311	1.1	1.03	0.137	0.042	-0.322	-0.0948592
4360	126-UNSEP1-noVit-bot.tif:328: N-16	2335	7220	0.833	1.03	-0.264	0.042	1.348	0.306256
7056	143-UNSEP1.gel-no Vit 4.tif:336: N-24	6791	3830	1.313	1.03	0.393	0.042	0.356	-0.350223
8043	146-UNSEP1-noVit-top.tif:315: N-3	3148	10049	0.902	1.03	-0.149	0.042	-0.126	0.191445
8227	150-UNSEP1.gel-no Vit 1.tif:163: G-19	2003	1615	1.145	1.03	0.196	0.042	3.17	-0.152703
11898	162-UNSEP1.gel-no Vit 2.tif:138: F-18	2709	4884	0.946	1.03	-0.081	0.043	0.9	0.122732
13046	166-UNSEP1.gel-no Vit 4.tif:278: L-14	4396	6190	1.015	1.03	0.022	0.043	0.61	0.0211646
13921	68-UNSEP1.gel-no Vit 4.tif:145: G-1	2905	6655	1.5	1.03	0.585	0.043	-0.222	-0.542318
15755	78-UNSEP1.gel-no Vit 6.tif:299: M-11	2196	5945	1.24	1.03	0.311	0.043	-0.093	-0.267696
1191	114-UNSEP1.gel-no Vit 3.tif:183: H-15	1569	6045	0.873	1.031	-0.196	0.044	0.771	0.239991
7234	144-UNSEP1.gel-no Vit 3.tif:178: H-10	3683	5274	0.959	1.031	-0.061	0.044	0.107	0.104442
9230	153-UNSEP1.gel-no Vit 4.tif:158: G-14	1651	1882	1.155	1.031	0.208	0.044	-0.459	-0.163849
13947	68-UNSEP1.gel-no Vit 4.tif:171: H-3	1990	6660	1.028	1.031	0.039	0.044	0	0.00420407
8388	150-UNSEP1.gel-no Vit 1.tif:324: N-12	1818	1619	1.039	1.032	0.056	0.046	0.737	-0.00975268
12606	163REP2-UNSEP1.gel-no Vit 1.tif:174: H-6	9364	3224	1.671	1.032	0.741	0.046	0.737	-0.695269
13465	168-UNSEP1.gel-no Vit 2.tif:25: B-1	3196	6460	1.282	1.032	0.358	0.045	1.605	-0.312953
2200	120-UNSEP1.gel-no Vit 1.tif:184: H-16	2449	5881	1.254	1.033	0.327	0.047	1.7	-0.279697
4505	127-UNSEP1-noVit-top.tif:137: F-17	2761	9240	0.989	1.033	-0.017	0.047	0.152	0.0627978
7319	144-UNSEP1.gel-no Vit 3.tif:263: K-23	5006	5285	1.303	1.033	0.382	0.047	0	-0.334997
7362	144-UNSEP1.gel-no Vit 3.tif:306: M-18	4380	5285	1.14	1.033	0.189	0.047	0.093	-0.142194
10027	156-UNSEP1.gel-no Vit 3.tif:283: L-19	1939	1584	1.173	1.033	0.23	0.047	1.385	-0.183363
12598	163REP2-UNSEP1.gel-no Vit 1.tif:166: G-22	7144	3225	1.275	1.033	0.35	0.046	0.951	-0.303657
3986	125-UNSEP1-noVit-top.tif:290: M-2	4503	8321	1.229	1.034	0.297	0.048	1.138	-0.249249
6156	141-UNSEP1.gel-no Vit 6.tif:108: E-12	2449	5960	0.921	1.034	-0.119	0.048	0.107	0.166963
6255	141-UNSEP1.gel-no Vit 6.tif:207: I-15	2443	5958	0.919	1.034	-0.122	0.048	0.115	0.170099
7785	146-UNSEP1-noVit-top.tif:57: C-9	3066	10089	0.879	1.034	-0.187	0.048	0.415	0.234301
8176	150-UNSEP1.gel-no Vit 1.tif:112: E-16	1686	1622	0.964	1.034	-0.053	0.048	1.222	0.101131
12717	163REP2-UNSEP1.gel-no Vit 1.tif:285: L-21	6114	3230	1.091	1.034	0.126	0.049	0.858	-0.0774149
15278	77-UNSEP.gel-with Vit 1.tif:158: G-14	4102	2049	1.191	1.034	0.252	0.048	0.17	-0.203937
4525	127-UNSEP1-noVit-top.tif:157: G-13	2741	9260	0.981	1.035	-0.027	0.05	0.778	0.0773057
4560	127-UNSEP1-noVit-top.tif:192: H-24	2814	9252	1.008	1.035	0.011	0.049	1	0.0381351
4815	128-UNSEP1-noVit-bot.tif:111: E-15	2843	8315	0.796	1.035	-0.329	0.05	0.1	0.37879
8300	150-UNSEP1.gel-no Vit 1.tif:236: J-20	2007	1623	1.148	1.035	0.199	0.049	1	-0.149492
9369	153-UNSEP1.gel-no Vit 4.tif:297: M-9	1527	1890	1.069	1.035	0.096	0.05	-2.115	-0.0466311
13480	168-UNSEP1.gel-no Vit 2.tif:40: B-16	3486	6482	1.398	1.035	0.484	0.05	0.823	-0.433734
15219	77-UNSEP.gel-with Vit 1.tif:99: E-3	6590	2052	1.913	1.035	0.936	0.05	0.263	-0.886206
17502	88-UNSEP1.gel-no Vit 2-1.tif:30: B-6	2958	5000	1.133	1.035	0.18	0.049	2.632	-0.130517
2550	121-UNSEP1.gel-no Vit 2-1.tif:198: I-6	2184	10043	1.115	1.036	0.157	0.051	0.322	-0.10602
7610	145-UNSEP1.gel-no Vit 2.tif:218: J-2	3459	5742	0.792	1.036	-0.337	0.051	0.16	0.387452
10336	158-UNSEP1.gel-no Vit 2.tif:256: K-16	1398	1966	0.912	1.036	-0.133	0.051	-0.585	0.183918
11130	160-UNSEP1.gel-no Vit 4.tif:42: B-18	3950	4652	1.101	1.036	0.138	0.051	0.263	-0.0877905
11143	160-UNSEP1.gel-no Vit 4.tif:55: C-7	9647	4653	2.688	1.036	1.427	0.051	1	-1.37551	activator
13471	168-UNSEP1.gel-no Vit 2.tif:31: B-7	2573	6485	1.032	1.036	0.046	0.051	0.959	0.00558103
15201	77-UNSEP.gel-with Vit 1.tif:81: D-9	4671	2054	1.356	1.036	0.439	0.051	0.759	-0.388333
15249	77-UNSEP.gel-with Vit 1.tif:129: F-9	5365	2054	1.557	1.036	0.639	0.051	0.138	-0.587745
15430	77-UNSEP.gel-with Vit 1.tif:310: M-22	5215	2053	1.514	1.036	0.598	0.051	0.107	-0.547341
20434	97-UNSEP1.gel-no Vit 3.tif:274: L-10	3565	3718	1.097	1.036	0.133	0.051	0	-0.0825395
3	110-UNSEP1.gel-no Vit 6.tif:3: A-3	2063	6509	1.092	1.037	0.127	0.053	0.678	-0.074557
656	111-UNSEP1.gel-no Vit 5.tif:320: N-8	2433	5347	1.269	1.037	0.343	0.052	-0.485	-0.291276
1792	118-UNSEP1.gel-no Vit 1.tif:112: E-16	1910	6468	1.044	1.037	0.062	0.053	1.348	-0.00970582
10690	159-2-UNSEP1.gel-no Vit 1.tif:274: L-10	1376	1605	0.991	1.037	-0.012	0.052	-3.907	0.0654589
12355	163-UNSEP1.gel-no Vit 1.tif:259: K-19	3064	5882	1.071	1.037	0.099	0.052	0.515	-0.0465426
13030	166-UNSEP1.gel-no Vit 4.tif:262: K-22	4182	6230	0.966	1.037	-0.05	0.052	0.933	0.102321
13077	166-UNSEP1.gel-no Vit 4.tif:309: M-21	4900	6230	1.132	1.037	0.178	0.052	1.372	-0.126458
16496	81-UNSEP1.gel-no Vit 3.tif:32: B-8	1913	4362	0.959	1.037	-0.06	0.053	0	0.112813
5514	130-UNSEP1-noVit-bot.tif:138: F-18	3240	8768	0.899	1.038	-0.154	0.054	0.093	0.207413
6215	141-UNSEP1.gel-no Vit 6.tif:167: G-23	2567	5986	0.965	1.038	-0.051	0.054	0	0.105206
6617	142-UNSEP1.gel-no Vit 5.tif:233: J-17	2889	4432	0.692	1.038	-0.532	0.054	0.206	0.584963
11726	161-UNSEP1.gel-no Vit 3.tif:302: M-14	2022	3193	0.86	1.038	-0.218	0.054	2	0.271398
20062	96-UNSEP1.gel-no Vit 2.tif:238: J-22	3507	3903	1.231	1.038	0.3	0.054	-0.322	-0.246024
1908	118-UNSEP1.gel-no Vit 1.tif:228: J-12	2093	6479	1.144	1.039	0.194	0.055	-0.263	-0.138891
4230	126-UNSEP1-noVit-bot.tif:198: I-6	3375	7287	1.204	1.039	0.268	0.055	1.147	-0.21264
4415	127-UNSEP1-noVit-top.tif:47: B-23	3027	9294	1.084	1.039	0.116	0.056	0.585	-0.0611691
9735	155-UNSEP1.gel-no Vit 5.tif:327: N-15	1877	1817	1.294	1.039	0.372	0.056	-0.585	-0.316642
9806	156-UNSEP1.gel-no Vit 3.tif:62: C-14	1377	1593	0.833	1.039	-0.264	0.055	-1	0.318807
12590	163REP2-UNSEP1.gel-no Vit 1.tif:158: G-14	6648	3244	1.186	1.039	0.247	0.055	1.722	-0.190908
7866	146-UNSEP1-noVit-top.tif:138: F-18	3735	10146	1.07	1.04	0.098	0.056	0.126	-0.0410273
8987	152-UNSEP1.gel-no Vit 3.tif:251: K-11	1568	1913	1.054	1.04	0.076	0.057	0	-0.0192913
9352	153-UNSEP1.gel-no Vit 4.tif:280: L-16	1611	1899	1.127	1.04	0.173	0.057	-1.322	-0.115904
11223	160-UNSEP1.gel-no Vit 4.tif:135: F-15	3790	4670	1.056	1.04	0.079	0.057	0.28	-0.0220263
12557	163REP2-UNSEP1.gel-no Vit 1.tif:125: F-5	7710	3248	1.376	1.04	0.46	0.057	1.044	-0.403897
13308	167-UNSEP1.gel-no Vit 3.tif:204: I-12	2928	7614	1.083	1.04	0.115	0.056	1	-0.0584497
15176	77-UNSEP.gel-with Vit 1.tif:56: C-8	4065	2061	1.18	1.04	0.239	0.056	0	-0.182203
4127	126-UNSEP1-noVit-bot.tif:95: D-23	2256	7302	0.805	1.041	-0.314	0.058	0.807	0.370909
6086	141-UNSEP1.gel-no Vit 6.tif:38: B-14	2813	5999	1.058	1.041	0.081	0.058	0.107	-0.0233696
8649	151-UNSEP1.gel-no Vit 2-1.tif:249: K-9	1495	1513	1.014	1.041	0.02	0.058	-1.585	0.0379124
6615	142-UNSEP1.gel-no Vit 5.tif:231: J-15	3028	4448	0.725	1.042	-0.464	0.059	0.263	0.523302
7563	145-UNSEP1.gel-no Vit 2.tif:171: H-3	5440	5777	1.245	1.042	0.316	0.059	0.17	-0.25679
9037	152-UNSEP1.gel-no Vit 3.tif:301: M-13	1618	1917	1.088	1.042	0.122	0.06	-0.585	-0.0623233
9686	155-UNSEP1.gel-no Vit 5.tif:278: L-14	1472	1822	1.015	1.042	0.021	0.06	-0.322	0.0378756
11836	162-UNSEP1.gel-no Vit 2.tif:76: D-4	3695	4937	1.29	1.042	0.367	0.059	0.547	-0.308016
12311	163-UNSEP1.gel-no Vit 1.tif:215: I-23	3726	5912	1.303	1.042	0.381	0.059	0.337	-0.322482
12484	163REP2-UNSEP1.gel-no Vit 1.tif:52: C-4	7596	3253	1.356	1.042	0.439	0.059	1.202	-0.380002
19965	96-UNSEP1.gel-no Vit 2.tif:141: F-21	3265	3917	1.146	1.042	0.197	0.059	0	-0.137252
3030	123-UNSEP1-noVit-top.tif:6: A-6	2400	7664	0.826	1.043	-0.276	0.06	1.126	0.336525
4508	127-UNSEP1-noVit-top.tif:140: F-20	2753	9330	0.986	1.043	-0.021	0.061	0.126	0.0810796
7952	146-UNSEP1-noVit-top.tif:224: J-8	3669	10181	1.051	1.043	0.072	0.061	0	-0.0110235
14041	68-UNSEP1.gel-no Vit 4.tif:265: L-1	2224	6734	1.149	1.043	0.2	0.06	-0.363	-0.13964
20221	97-UNSEP1.gel-no Vit 3.tif:61: C-13	3827	3743	1.177	1.043	0.235	0.06	2.248	-0.174375
5331	129-UNSEP1-noVit-top.tif:291: M-3	3533	10242	1.036	1.044	0.051	0.061	0.082	0.0110977
7094	144-UNSEP1.gel-no Vit 3.tif:38: B-14	4172	5340	1.086	1.044	0.119	0.062	0	-0.0569024
7176	144-UNSEP1.gel-no Vit 3.tif:120: E-24	4051	5338	1.055	1.044	0.077	0.062	0.263	-0.0151213
7532	145-UNSEP1.gel-no Vit 2.tif:140: F-20	4459	5786	1.021	1.044	0.03	0.062	0.126	0.0321388
7550	145-UNSEP1.gel-no Vit 2.tif:158: G-14	4181	5788	0.957	1.044	-0.063	0.062	0.115	0.125531
8635	151-UNSEP1.gel-no Vit 2-1.tif:235: J-19	1540	1518	1.045	1.044	0.063	0.062	-3	-0.00138123
11873	162-UNSEP1.gel-no Vit 2.tif:113: E-17	2588	4947	0.903	1.044	-0.146	0.062	0.193	0.209324
12613	163REP2-UNSEP1.gel-no Vit 1.tif:181: H-13	9769	3259	1.743	1.044	0.802	0.062	0.181	-0.739451
12841	166-UNSEP1.gel-no Vit 4.tif:73: D-1	5478	6273	1.265	1.044	0.339	0.062	1.144	-0.277016
13476	168-UNSEP1.gel-no Vit 2.tif:36: B-12	3476	6534	1.394	1.044	0.48	0.062	1.322	-0.417109
14101	68-UNSEP1.gel-no Vit 4.tif:325: N-13	2126	6744	1.098	1.044	0.135	0.062	-0.415	-0.0727563
15404	77-UNSEP.gel-with Vit 1.tif:284: L-20	3995	2069	1.16	1.044	0.214	0.062	0.107	-0.152003
20220	97-UNSEP1.gel-no Vit 3.tif:60: C-12	4255	3746	1.309	1.044	0.388	0.061	1.17	-0.326343
748	113-UNSEP1.gel-no Vit 4.tif:76: D-4	2066	7016	1.071	1.045	0.099	0.064	1.379	-0.0354555
6179	141-UNSEP1.gel-no Vit 6.tif:131: F-11	2513	6021	0.945	1.045	-0.081	0.063	0.222	0.145117
7374	144-UNSEP1.gel-no Vit 3.tif:318: N-6	4020	5346	1.047	1.045	0.066	0.064	0	-0.0027585
13339	167-UNSEP1.gel-no Vit 3.tif:235: J-19	2867	7650	1.06	1.045	0.084	0.063	1.541	-0.0205613
15262	77-UNSEP.gel-with Vit 1.tif:142: F-22	5670	2072	1.646	1.045	0.719	0.064	0	-0.655461
2683	121-UNSEP1.gel-no Vit 2-1.tif:331: N-19	1753	10140	0.895	1.046	-0.16	0.065	-0.115	0.224923
4290	126-UNSEP1-noVit-bot.tif:258: K-18	2313	7336	0.825	1.046	-0.278	0.065	0	0.342417
7348	144-UNSEP1.gel-no Vit 3.tif:292: M-4	4057	5348	1.056	1.046	0.079	0.065	0.067	-0.013727
7829	146-UNSEP1-noVit-top.tif:101: E-5	3254	10207	0.933	1.046	-0.101	0.065	0.126	0.164934
8025	146-UNSEP1-noVit-top.tif:297: M-9	3376	10209	0.968	1.046	-0.048	0.065	0	0.111804
12197	163-UNSEP1.gel-no Vit 1.tif:101: E-5	2788	5938	0.975	1.046	-0.037	0.066	1.078	0.101409
12514	163REP2-UNSEP1.gel-no Vit 1.tif:82: D-10	9304	3267	1.66	1.046	0.731	0.065	0.107	-0.6663
13363	167-UNSEP1.gel-no Vit 3.tif:259: K-19	2431	7661	0.899	1.046	-0.154	0.065	0.951	0.21849
13469	168-UNSEP1.gel-no Vit 2.tif:29: B-5	2687	6547	1.078	1.046	0.108	0.065	0.959	-0.0434743
1075	114-UNSEP1.gel-no Vit 3.tif:67: C-19	1573	6141	0.875	1.047	-0.193	0.066	0.348	0.258907
3762	125-UNSEP1-noVit-top.tif:66: C-18	3376	8428	0.921	1.047	-0.118	0.066	0.585	0.184988
7470	145-UNSEP1.gel-no Vit 2.tif:78: D-6	4044	5803	0.926	1.047	-0.111	0.066	0.28	0.177177
7954	146-UNSEP1-noVit-top.tif:226: J-10	3603	10217	1.033	1.047	0.046	0.066	0	0.0194212
10257	158-UNSEP1.gel-no Vit 2.tif:177: H-9	1437	1986	0.938	1.047	-0.093	0.066	-0.459	0.158602
10821	159-UNSEP1.gel-no Vit 5.tif:69: C-21	2964	6532	0.939	1.047	-0.09	0.066	0.248	0.157064
11263	160-UNSEP1.gel-no Vit 4.tif:175: H-7	7274	4703	2.027	1.047	1.019	0.067	0.83	-0.953085
14076	68-UNSEP1.gel-no Vit 4.tif:300: M-12	1904	6764	0.983	1.047	-0.024	0.067	0	0.0909981
18081	89-UNSEP1.gel-no Vit 3.tif:273: L-9	3548	4154	1.106	1.047	0.145	0.066	0.193	-0.0790899
20078	96-UNSEP1.gel-no Vit 2.tif:254: K-14	3383	3935	1.188	1.047	0.248	0.066	-0.263	-0.182273
20248	97-UNSEP1.gel-no Vit 3.tif:88: D-16	2817	3757	0.866	1.047	-0.207	0.066	2.273	0.273823
20786	98-UNSEP1.gel-no Vit 4.tif:290: M-2	3790	2815	1.247	1.047	0.318	0.066	-0.17	-0.2522
4038	126-UNSEP1-noVit-bot.tif:6: A-6	2850	7348	1.017	1.048	0.024	0.067	2	0.043319
5619	130-UNSEP1-noVit-bot.tif:243: K-3	3607	8850	1.001	1.048	0.0009669	0.068	0.212	0.0661967
9395	153-UNSEP1.gel-no Vit 4.tif:323: N-11	1499	1913	1.049	1.048	0.069	0.068	-2	-0.00137596
15158	77-UNSEP.gel-with Vit 1.tif:38: B-14	7356	2078	2.135	1.048	1.094	0.068	0	-1.0266	activator
15452	77-UNSEP.gel-with Vit 1.tif:332: N-20	5799	2077	1.683	1.048	0.751	0.068	0.222	-0.683396
16642	81-UNSEP1.gel-no Vit 3.tif:178: H-10	2462	4405	1.234	1.048	0.304	0.067	0	-0.235704
20045	96-UNSEP1.gel-no Vit 2.tif:221: J-5	2958	3941	1.039	1.048	0.055	0.068	0	0.0124431
78	110-UNSEP1.gel-no Vit 6.tif:78: D-6	1823	6584	0.965	1.049	-0.051	0.069	0	0.120414
2029	120-UNSEP1.gel-no Vit 1.tif:13: A-13	2296	5973	1.176	1.049	0.234	0.069	1.115	-0.164873
3858	125-UNSEP1-noVit-top.tif:162: G-18	3253	8447	0.888	1.049	-0.172	0.069	0.322	0.240383
4164	126-UNSEP1-noVit-bot.tif:132: F-12	2750	7356	0.981	1.049	-0.028	0.069	0.848	0.0966896
4906	128-UNSEP1-noVit-bot.tif:202: I-10	3106	8421	0.87	1.049	-0.202	0.068	0	0.269927
12712	163REP2-UNSEP1.gel-no Vit 1.tif:280: L-16	8165	3276	1.457	1.049	0.543	0.069	0.663	-0.473986
13188	167-UNSEP1.gel-no Vit 3.tif:84: D-12	3390	7685	1.254	1.049	0.326	0.07	1.222	-0.257523
13978	68-UNSEP1.gel-no Vit 4.tif:202: I-10	2053	6775	1.06	1.049	0.084	0.069	-0.222	-0.0150496
20000	96-UNSEP1.gel-no Vit 2.tif:176: H-8	3516	3945	1.235	1.049	0.304	0.069	-0.322	-0.235496
2646	121-UNSEP1.gel-no Vit 2-1.tif:294: M-6	2284	10183	1.166	1.05	0.221	0.071	1.093	-0.151178
3201	123-UNSEP1-noVit-top.tif:177: H-9	2795	7719	0.962	1.05	-0.056	0.071	0.193	0.126281
4391	127-UNSEP1-noVit-top.tif:23: A-23	3078	9386	1.102	1.05	0.14	0.07	1.708	-0.0697349
8389	150-UNSEP1.gel-no Vit 1.tif:325: N-13	1938	1647	1.108	1.05	0.148	0.071	1.907	-0.0775686
9402	153-UNSEP1.gel-no Vit 4.tif:330: N-18	1559	1917	1.091	1.05	0.126	0.071	-0.322	-0.0552618
10736	159-2-UNSEP1.gel-no Vit 1.tif:320: N-8	1455	1625	1.048	1.05	0.068	0.07	-1	0.00275061
14006	68-UNSEP1.gel-no Vit 4.tif:230: J-14	2256	6784	1.165	1.05	0.22	0.071	-0.222	-0.149941
20094	96-UNSEP1.gel-no Vit 2.tif:270: L-6	3078	3949	1.081	1.05	0.112	0.071	0	-0.0419772
9812	156-UNSEP1.gel-no Vit 3.tif:68: C-20	1681	1612	1.017	1.051	0.024	0.072	-1.585	0.047443
11421	160-UNSEP1.gel-no Vit 4.tif:333: N-21	3861	4718	1.076	1.051	0.106	0.071	0.796	-0.0339154
11759	161-UNSEP1.gel-no Vit 3.tif:335: N-23	3028	3230	1.287	1.051	0.364	0.071	1.441	-0.292249
12043	162-UNSEP1.gel-no Vit 2.tif:283: L-19	2616	4984	0.913	1.051	-0.131	0.072	0.415	0.203076
4258	126-UNSEP1-noVit-bot.tif:226: J-10	2395	7379	0.854	1.052	-0.227	0.074	0	0.300827
4690	127-UNSEP1-noVit-top.tif:322: N-10	2904	9406	1.04	1.052	0.056	0.073	0.737	0.0165512
6018	138-UNSEP1.gel-no Vit 1.tif:306: M-18	3038	3615	1.058	1.052	0.081	0.073	1.585	-0.00820492
6669	142-UNSEP1.gel-no Vit 5.tif:285: L-21	3431	4491	0.821	1.052	-0.284	0.073	0.107	0.357681
7137	144-UNSEP1.gel-no Vit 3.tif:81: D-9	3904	5378	1.016	1.052	0.023	0.073	0.16	0.0502343
7939	146-UNSEP1-noVit-top.tif:211: I-19	3607	10271	1.034	1.052	0.048	0.074	-0.126	0.0248985
8226	150-UNSEP1.gel-no Vit 1.tif:162: G-18	1705	1650	0.975	1.052	-0.037	0.073	1.807	0.109661
9071	152-UNSEP1.gel-no Vit 3.tif:335: N-23	1609	1934	1.082	1.052	0.114	0.072	-0.17	-0.0405658
13294	167-UNSEP1.gel-no Vit 3.tif:190: H-22	2466	7706	0.912	1.052	-0.133	0.074	0.862	0.206029
14027	68-UNSEP1.gel-no Vit 4.tif:251: K-11	2317	6796	1.197	1.052	0.259	0.073	0.415	-0.186288
18779	92-UNSEP1.gel-no Vit 5.tif:299: M-11	3292	3377	0.953	1.052	-0.069	0.073	1.193	0.142587
20417	97-UNSEP1.gel-no Vit 3.tif:257: K-17	3551	3776	1.092	1.052	0.127	0.073	0	-0.0538382
1205	114-UNSEP1.gel-no Vit 3.tif:197: I-5	1865	6179	1.037	1.053	0.053	0.075	0.922	0.0220895
9158	153-UNSEP1.gel-no Vit 4.tif:86: D-14	1597	1923	1.117	1.053	0.16	0.075	-0.138	-0.0851237
12518	163REP2-UNSEP1.gel-no Vit 1.tif:86: D-14	8794	3288	1.569	1.053	0.65	0.074	0.459	-0.57534
15230	77-UNSEP.gel-with Vit 1.tif:110: E-14	5880	2087	1.707	1.053	0.771	0.074	0	-0.696958
16719	81-UNSEP1.gel-no Vit 3.tif:255: K-15	1990	4427	0.998	1.053	-0.003	0.074	0	0.0773937
2196	120-UNSEP1.gel-no Vit 1.tif:180: H-12	2083	6002	1.067	1.054	0.093	0.076	-0.322	-0.0176853
3318	123-UNSEP1-noVit-top.tif:294: M-6	2855	7745	0.983	1.054	-0.025	0.076	0.152	0.100612
6977	143-UNSEP1.gel-no Vit 4.tif:257: K-17	4450	3920	0.86	1.054	-0.217	0.076	0.074	0.293466
7096	144-UNSEP1.gel-no Vit 3.tif:40: B-16	3771	5391	0.982	1.054	-0.027	0.076	0	0.10208
11831	162-UNSEP1.gel-no Vit 2.tif:71: C-23	2719	4998	0.949	1.054	-0.075	0.076	0.138	0.151395
12737	163REP2-UNSEP1.gel-no Vit 1.tif:305: M-17	5692	3290	1.016	1.054	0.023	0.075	1.273	0.0529745
12839	166-UNSEP1.gel-no Vit 4.tif:71: C-23	4617	6332	1.066	1.054	0.093	0.075	0.893	-0.0163326
20008	96-UNSEP1.gel-no Vit 2.tif:184: H-16	3027	3963	1.063	1.054	0.088	0.076	0	-0.0122667
20135	96-UNSEP1.gel-no Vit 2.tif:311: M-23	3108	3964	1.091	1.054	0.126	0.076	0.415	-0.0497762
3244	123-UNSEP1-noVit-top.tif:220: J-4	2936	7753	1.01	1.055	0.015	0.077	1.7	0.0628877
6209	141-UNSEP1.gel-no Vit 6.tif:161: G-17	2793	6079	1.05	1.055	0.071	0.077	0.28	0.00685367
7631	145-UNSEP1.gel-no Vit 2.tif:239: J-23	5540	5848	1.268	1.055	0.343	0.077	0.17	-0.265312
8110	150-UNSEP1.gel-no Vit 1.tif:46: B-22	1875	1655	1.072	1.055	0.1	0.078	5.322	-0.0230619
9284	153-UNSEP1.gel-no Vit 4.tif:212: I-20	1625	1926	1.137	1.055	0.185	0.077	-0.29	-0.107989
11252	160-UNSEP1.gel-no Vit 4.tif:164: G-20	4292	4739	1.196	1.055	0.258	0.078	0.415	-0.180974
11903	162-UNSEP1.gel-no Vit 2.tif:143: F-23	2802	5003	0.978	1.055	-0.032	0.078	0.354	0.109337
18283	91-UNSEP1.gel-no Vit 4.tif:139: F-19	3637	4089	1.137	1.055	0.186	0.077	-0.152	-0.107989
8590	151-UNSEP1.gel-no Vit 2-1.tif:190: H-22	1619	1535	1.098	1.056	0.135	0.078	0.222	-0.0562682
9660	155-UNSEP1.gel-no Vit 5.tif:252: K-12	1443	1846	0.995	1.056	-0.007	0.078	0.115	0.0858414
12981	166-UNSEP1.gel-no Vit 4.tif:213: I-21	5247	6349	1.212	1.056	0.277	0.079	1.619	-0.19878
16099	79-UNSEP1.gel-no Vit 5.tif:307: M-19	2082	4374	0.901	1.056	-0.15	0.078	0.17	0.229011
18090	89-UNSEP1.gel-no Vit 3.tif:282: L-18	3777	4191	1.177	1.056	0.236	0.079	-0.263	-0.156504
19725	95-UNSEP1.gel-no Vit 1.tif:237: J-21	1614	2983	0.755	1.056	-0.405	0.079	-0.322	0.484061
20145	96-UNSEP1.gel-no Vit 2.tif:321: N-9	3212	3972	1.128	1.056	0.174	0.079	0	-0.0951572
718	113-UNSEP1.gel-no Vit 4.tif:46: B-22	2474	7093	1.283	1.057	0.359	0.079	0.737	-0.279546
6546	142-UNSEP1.gel-no Vit 5.tif:162: G-18	3075	4512	0.736	1.057	-0.442	0.08	1	0.522198
7505	145-UNSEP1.gel-no Vit 2.tif:113: E-17	4215	5859	0.965	1.057	-0.052	0.08	0.415	0.131375
8231	150-UNSEP1.gel-no Vit 1.tif:167: G-23	2099	1658	1.2	1.057	0.263	0.08	4.781	-0.183059
8993	152-UNSEP1.gel-no Vit 3.tif:257: K-17	1690	1945	1.136	1.057	0.185	0.081	-0.415	-0.103987
15449	77-UNSEP.gel-with Vit 1.tif:329: N-17	5009	2095	1.454	1.057	0.54	0.08	0.126	-0.460052
1984	118-UNSEP1.gel-no Vit 1.tif:304: M-16	2599	6598	1.42	1.058	0.506	0.081	1.28	-0.424551
4224	126-UNSEP1-noVit-bot.tif:192: H-24	2264	7416	0.808	1.058	-0.308	0.081	0.759	0.388912
7027	143-UNSEP1.gel-no Vit 4.tif:307: M-19	5372	3935	1.038	1.058	0.054	0.081	0.305	0.0275332
8390	150-UNSEP1.gel-no Vit 1.tif:326: N-14	2046	1659	1.17	1.058	0.226	0.081	1.585	-0.145169
10340	158-UNSEP1.gel-no Vit 2.tif:260: K-20	1313	2008	0.857	1.058	-0.223	0.082	-0.585	0.303973
10910	159-UNSEP1.gel-no Vit 5.tif:158: G-14	2399	6605	0.76	1.058	-0.396	0.082	0.485	0.477268
15224	77-UNSEP.gel-with Vit 1.tif:104: E-8	4235	2096	1.229	1.058	0.298	0.081	0	-0.216145
7473	145-UNSEP1.gel-no Vit 2.tif:81: D-9	4537	5871	1.039	1.059	0.055	0.083	1.237	0.0275069
9038	152-UNSEP1.gel-no Vit 3.tif:302: M-14	1664	1947	1.119	1.059	0.162	0.082	-0.778	-0.0795074
9371	153-UNSEP1.gel-no Vit 4.tif:299: M-11	1561	1933	1.092	1.059	0.127	0.083	-2	-0.0442703
14286	70-UNSEP1.gel-no Vit 4.tif:174: H-6	1910	5207	0.96	1.059	-0.059	0.083	0.737	0.141596
18062	89-UNSEP1.gel-no Vit 3.tif:254: K-14	3394	4201	1.058	1.059	0.081	0.083	0	0.00136296
18208	91-UNSEP1.gel-no Vit 4.tif:64: C-16	2734	4103	0.855	1.059	-0.226	0.082	1	0.308706
1069	114-UNSEP1.gel-no Vit 3.tif:61: C-13	1703	6220	0.947	1.06	-0.078	0.085	1.078	0.162628
1849	118-UNSEP1.gel-no Vit 1.tif:169: H-1	1915	6609	1.046	1.06	0.066	0.084	1.692	0.0191814
6327	141-UNSEP1.gel-no Vit 6.tif:279: L-15	3089	6113	1.162	1.06	0.216	0.085	0.29	-0.132546
7902	146-UNSEP1-noVit-top.tif:174: H-6	3139	10349	0.9	1.06	-0.153	0.085	0.652	0.236067
8342	150-UNSEP1.gel-no Vit 1.tif:278: L-14	1713	1662	0.979	1.06	-0.03	0.084	0.737	0.114683
10382	158-UNSEP1.gel-no Vit 2.tif:302: M-14	1492	2011	0.974	1.06	-0.039	0.084	-0.415	0.122071
12217	163-UNSEP1.gel-no Vit 1.tif:121: F-1	3483	6013	1.218	1.06	0.284	0.084	1.369	-0.20045
2502	121-UNSEP1.gel-no Vit 2-1.tif:150: G-6	2012	10283	1.027	1.061	0.038	0.085	0.341	0.0469885
5563	130-UNSEP1-noVit-bot.tif:187: H-19	3089	8956	0.857	1.061	-0.223	0.085	0.3	0.308058
8087	150-UNSEP1.gel-no Vit 1.tif:23: A-23	2142	1664	1.225	1.061	0.292	0.085	3.459	-0.207357
9302	153-UNSEP1.gel-no Vit 4.tif:230: J-14	1779	1937	1.245	1.061	0.316	0.086	0	-0.230721
11900	162-UNSEP1.gel-no Vit 2.tif:140: F-20	2614	5028	0.913	1.061	-0.132	0.085	0.453	0.216738
13277	167-UNSEP1.gel-no Vit 3.tif:173: H-5	3735	7773	1.381	1.061	0.466	0.086	2.143	-0.380289
16759	81-UNSEP1.gel-no Vit 3.tif:295: M-7	2184	4461	1.095	1.061	0.131	0.085	0.193	-0.0455062
20487	97-UNSEP1.gel-no Vit 3.tif:327: N-15	3530	3807	1.086	1.061	0.119	0.085	0	-0.0335994
628	111-UNSEP1.gel-no Vit 5.tif:292: M-4	2011	5478	1.049	1.062	0.069	0.087	0.83	0.0177691
7100	144-UNSEP1.gel-no Vit 3.tif:44: B-20	3981	5433	1.036	1.062	0.052	0.087	0.474	0.0357598
7380	144-UNSEP1.gel-no Vit 3.tif:324: N-12	2791	5431	0.727	1.062	-0.461	0.087	0.082	0.546756
7905	146-UNSEP1-noVit-top.tif:177: H-9	3300	10364	0.946	1.062	-0.08	0.087	0	0.166872
14030	68-UNSEP1.gel-no Vit 4.tif:254: K-14	2024	6857	1.045	1.062	0.064	0.086	1	0.0232808
1918	118-UNSEP1.gel-no Vit 1.tif:238: J-22	1977	6627	1.08	1.063	0.111	0.088	1.054	-0.0228897
6212	141-UNSEP1.gel-no Vit 6.tif:164: G-20	2392	6126	0.9	1.063	-0.153	0.088	0.107	0.240145
6291	141-UNSEP1.gel-no Vit 6.tif:243: K-3	2705	6125	1.017	1.063	0.025	0.088	0	0.0638219
6358	141-UNSEP1.gel-no Vit 6.tif:310: M-22	2749	6125	1.034	1.063	0.048	0.088	0.082	0.0399054
8271	150-UNSEP1.gel-no Vit 1.tif:207: I-15	1480	1667	0.846	1.063	-0.241	0.088	1	0.329412
9348	153-UNSEP1.gel-no Vit 4.tif:276: L-12	1508	1940	1.055	1.063	0.078	0.088	-0.115	0.0108986
18805	92-UNSEP1.gel-no Vit 5.tif:325: N-13	3544	3413	1.026	1.063	0.038	0.088	-0.222	0.0511109
19769	95-UNSEP1.gel-no Vit 1.tif:281: L-17	1832	3002	0.857	1.063	-0.222	0.088	2.392	0.310774
6038	138-UNSEP1.gel-no Vit 1.tif:326: N-14	3559	3655	1.239	1.064	0.309	0.089	0.181	-0.219678
15277	77-UNSEP.gel-with Vit 1.tif:157: G-13	5001	2108	1.452	1.064	0.538	0.089	0.692	-0.448543
15397	77-UNSEP.gel-with Vit 1.tif:277: L-13	2579	2108	0.749	1.064	-0.418	0.089	0	0.506461
17729	88-UNSEP1.gel-no Vit 2-1.tif:257: K-17	2892	5142	1.108	1.064	0.147	0.09	1.415	-0.0584597
20075	96-UNSEP1.gel-no Vit 2.tif:251: K-11	3255	4001	1.143	1.064	0.193	0.09	1.138	-0.103327
3727	125-UNSEP1-noVit-top.tif:31: B-7	5886	8571	1.606	1.065	0.684	0.09	2.636	-0.592618
7012	143-UNSEP1.gel-no Vit 4.tif:292: M-4	4519	3961	0.874	1.065	-0.195	0.091	0.585	0.285148
7101	144-UNSEP1.gel-no Vit 3.tif:45: B-21	3824	5448	0.996	1.065	-0.006	0.091	0.16	0.0966358
7628	145-UNSEP1.gel-no Vit 2.tif:236: J-20	5711	5903	1.307	1.065	0.387	0.091	0.322	-0.295406
9201	153-UNSEP1.gel-no Vit 4.tif:129: F-9	1611	1944	1.127	1.065	0.173	0.091	-0.485	-0.0816341
17588	88-UNSEP1.gel-no Vit 2-1.tif:116: E-20	2064	5149	0.79	1.065	-0.339	0.092	1.392	0.430929
20035	96-UNSEP1.gel-no Vit 2.tif:211: I-19	3406	4003	1.196	1.065	0.258	0.09	-0.263	-0.167364
1183	114-UNSEP1.gel-no Vit 3.tif:175: H-7	1874	6254	1.042	1.066	0.06	0.093	1	0.0328522
3353	123-UNSEP1-noVit-top.tif:329: N-17	3100	7834	1.067	1.066	0.093	0.092	0.193	-0.00135274
3983	125-UNSEP1-noVit-top.tif:287: L-23	2986	8585	0.815	1.066	-0.295	0.093	0.152	0.387335
7121	144-UNSEP1.gel-no Vit 3.tif:65: C-17	3645	5452	0.949	1.066	-0.076	0.092	0	0.167727
8299	150-UNSEP1.gel-no Vit 1.tif:235: J-19	1891	1672	1.081	1.066	0.113	0.092	3.907	-0.0201591
8552	151-UNSEP1.gel-no Vit 2-1.tif:152: G-8	1438	1550	0.975	1.066	-0.036	0.092	-1.737	0.128733
11040	159-UNSEP1.gel-no Vit 5.tif:288: L-24	3015	6655	0.955	1.066	-0.066	0.093	1.503	0.158635
13242	167-UNSEP1.gel-no Vit 3.tif:138: F-18	2642	7809	0.977	1.066	-0.034	0.093	1.241	0.125777
13330	167-UNSEP1.gel-no Vit 3.tif:226: J-10	2572	7806	0.951	1.066	-0.072	0.092	1.536	0.16469
15341	77-UNSEP.gel-with Vit 1.tif:221: J-5	5433	2112	1.577	1.066	0.657	0.092	0	-0.564975
15772	78-UNSEP1.gel-no Vit 6.tif:316: N-4	1627	6152	0.919	1.066	-0.122	0.092	-0.107	0.214071
2254	120-UNSEP1.gel-no Vit 1.tif:238: J-22	19413	6075	9.943	1.067	3.314	0.094	0	-3.22012	activator
2445	121-UNSEP1.gel-no Vit 2-1.tif:93: D-21	1765	10349	0.901	1.067	-0.151	0.094	0.248	0.243961
5417	130-UNSEP1-noVit-bot.tif:41: B-17	3574	9010	0.992	1.067	-0.012	0.094	0.341	0.105148
6278	141-UNSEP1.gel-no Vit 6.tif:230: J-14	2432	6152	0.915	1.067	-0.129	0.094	0.152	0.221717
7179	144-UNSEP1.gel-no Vit 3.tif:123: F-3	4712	5459	1.227	1.067	0.295	0.094	0.138	-0.201575
12329	163-UNSEP1.gel-no Vit 1.tif:233: J-17	3942	6052	1.378	1.067	0.463	0.093	0.692	-0.369016
12424	163-UNSEP1.gel-no Vit 1.tif:328: N-16	2787	6053	0.974	1.067	-0.037	0.093	0.087	0.131566
12597	163REP2-UNSEP1.gel-no Vit 1.tif:165: G-21	6421	3332	1.146	1.067	0.196	0.094	0.874	-0.103047
15338	77-UNSEP.gel-with Vit 1.tif:218: J-2	6161	2115	1.788	1.067	0.839	0.094	0.387	-0.744787
18087	89-UNSEP1.gel-no Vit 3.tif:279: L-15	3860	4233	1.203	1.067	0.267	0.093	0.678	-0.173076
18774	92-UNSEP1.gel-no Vit 5.tif:294: M-6	3809	3428	1.103	1.067	0.142	0.094	0.193	-0.0478726
19846	96-UNSEP1.gel-no Vit 2.tif:22: A-22	3308	4011	1.162	1.067	0.216	0.093	0	-0.12305
20146	96-UNSEP1.gel-no Vit 2.tif:322: N-10	3099	4013	1.088	1.067	0.122	0.094	0.222	-0.0281184
2373	121-UNSEP1.gel-no Vit 2-1.tif:21: A-21	1823	10357	0.93	1.068	-0.104	0.095	0.737	0.199609
5658	130-UNSEP1-noVit-bot.tif:282: L-18	3350	9023	0.929	1.068	-0.106	0.096	0.181	0.201161
6097	141-UNSEP1.gel-no Vit 6.tif:49: C-1	3146	6156	1.183	1.068	0.243	0.095	0.1	-0.147538
6213	141-UNSEP1.gel-no Vit 6.tif:165: G-21	2512	6156	0.945	1.068	-0.082	0.095	0.126	0.176525
6294	141-UNSEP1.gel-no Vit 6.tif:246: K-6	2628	6157	0.988	1.068	-0.017	0.095	0	0.112329
7239	144-UNSEP1.gel-no Vit 3.tif:183: H-15	3825	5464	0.996	1.068	-0.006	0.095	0.093	0.100694
9325	153-UNSEP1.gel-no Vit 4.tif:253: K-13	1644	1949	1.15	1.068	0.202	0.094	-0.585	-0.106722
13899	68-UNSEP1.gel-no Vit 4.tif:123: F-3	2304	6899	1.19	1.068	0.251	0.095	0	-0.15605
14077	68-UNSEP1.gel-no Vit 4.tif:301: M-13	2380	6897	1.229	1.068	0.298	0.095	-0.222	-0.202573
14095	68-UNSEP1.gel-no Vit 4.tif:319: N-7	2059	6899	1.063	1.068	0.089	0.095	-0.222	0.00677005
17747	88-UNSEP1.gel-no Vit 2-1.tif:275: L-11	2642	5159	1.012	1.068	0.017	0.094	0.585	0.0777024
637	111-UNSEP1.gel-no Vit 5.tif:301: M-13	1986	5516	1.036	1.069	0.051	0.097	-0.222	0.0452379
727	113-UNSEP1.gel-no Vit 4.tif:55: C-7	2105	7179	1.092	1.069	0.126	0.097	0.585	-0.030711
3289	123-UNSEP1-noVit-top.tif:265: L-1	3117	7859	1.073	1.069	0.101	0.097	1.672	-0.00538822
6592	142-UNSEP1.gel-no Vit 5.tif:208: I-16	2725	4565	0.652	1.069	-0.616	0.097	0.126	0.713318
7236	144-UNSEP1.gel-no Vit 3.tif:180: H-12	3208	5466	0.835	1.069	-0.26	0.096	0.241	0.356414
7289	144-UNSEP1.gel-no Vit 3.tif:233: J-17	4145	5467	1.079	1.069	0.11	0.096	0.1	-0.013433
8207	150-UNSEP1.gel-no Vit 1.tif:143: F-23	1996	1676	1.141	1.069	0.191	0.096	4.644	-0.0940369
9679	155-UNSEP1.gel-no Vit 5.tif:271: L-7	1487	1869	1.025	1.069	0.036	0.096	-0.379	0.0606379
9787	156-UNSEP1.gel-no Vit 3.tif:43: B-19	2033	1639	1.229	1.069	0.298	0.096	1.907	-0.201223
11303	160-UNSEP1.gel-no Vit 4.tif:215: I-23	3974	4798	1.107	1.069	0.147	0.096	0.637	-0.0503934
14098	68-UNSEP1.gel-no Vit 4.tif:322: N-10	1932	6903	0.998	1.069	-0.003	0.096	0	0.0991501
15445	77-UNSEP.gel-with Vit 1.tif:325: N-13	4950	2118	1.437	1.069	0.523	0.096	0.222	-0.426798
20034	96-UNSEP1.gel-no Vit 2.tif:210: I-18	3463	4018	1.216	1.069	0.282	0.096	-0.263	-0.185881
20275	97-UNSEP1.gel-no Vit 3.tif:115: E-19	3239	3837	0.996	1.069	-0.005	0.096	0	0.102044
1977	118-UNSEP1.gel-no Vit 1.tif:297: M-9	1823	6673	0.996	1.07	-0.006	0.098	0	0.103393
2667	121-UNSEP1.gel-no Vit 2-1.tif:315: N-3	1986	10373	1.014	1.07	0.02	0.097	-0.115	0.0775531
6472	142-UNSEP1.gel-no Vit 5.tif:88: D-16	2536	4567	0.607	1.07	-0.72	0.097	0.28	0.817842
8588	151-UNSEP1.gel-no Vit 2-1.tif:188: H-20	1601	1556	1.086	1.07	0.119	0.098	-1.515	-0.0214133
11276	160-UNSEP1.gel-no Vit 4.tif:188: H-20	3643	4803	1.015	1.07	0.022	0.097	0.17	0.0761311
12020	162-UNSEP1.gel-no Vit 2.tif:260: K-20	2769	5074	0.967	1.07	-0.049	0.098	0.144	0.146023
13093	166-UNSEP1.gel-no Vit 4.tif:325: N-13	4121	6429	0.952	1.07	-0.071	0.097	0.771	0.168577
13100	166-UNSEP1.gel-no Vit 4.tif:332: N-20	4658	6430	1.076	1.07	0.105	0.097	1.263	-0.00806728
16679	81-UNSEP1.gel-no Vit 3.tif:215: I-23	2809	4499	1.408	1.07	0.494	0.097	0.415	-0.396037
16758	81-UNSEP1.gel-no Vit 3.tif:294: M-6	2029	4501	1.017	1.07	0.025	0.098	-0.152	0.0732911
17708	88-UNSEP1.gel-no Vit 2-1.tif:236: J-20	2760	5173	1.057	1.07	0.08	0.098	0	0.0176354
661	111-UNSEP1.gel-no Vit 5.tif:325: N-13	2254	5524	1.175	1.071	0.233	0.099	-0.263	-0.133702
2079	120-UNSEP1.gel-no Vit 1.tif:63: C-15	1919	6097	0.983	1.071	-0.025	0.099	0.415	0.123695
4198	126-UNSEP1-noVit-bot.tif:166: G-22	2104	7513	0.75	1.071	-0.414	0.099	0.152	0.513996
4535	127-UNSEP1-noVit-top.tif:167: G-23	2946	9574	1.055	1.071	0.077	0.098	0.585	0.0217155
7695	145-UNSEP1.gel-no Vit 2.tif:303: M-15	4178	5935	0.956	1.071	-0.064	0.098	0.115	0.163876
13495	168-UNSEP1.gel-no Vit 2.tif:55: C-7	2511	6707	1.007	1.071	0.01	0.099	0.474	0.0888948
14826	76-UNSEP1.gel-no Vit 2.tif:42: B-18	1460	5749	1.034	1.071	0.048	0.099	0.177	0.0507223
15566	78-UNSEP1.gel-no Vit 6.tif:110: E-14	2238	6181	1.264	1.071	0.338	0.099	0.585	-0.239038
3238	123-UNSEP1-noVit-top.tif:214: I-22	2812	7877	0.968	1.072	-0.047	0.1	1.222	0.147226
5610	130-UNSEP1-noVit-bot.tif:234: J-18	3015	9053	0.836	1.072	-0.258	0.1	0.716	0.35873
6710	142-UNSEP1.gel-no Vit 5.tif:326: N-14	3977	4578	0.952	1.072	-0.071	0.101	0.1	0.171271
8180	150-UNSEP1.gel-no Vit 1.tif:116: E-20	2432	1682	1.391	1.072	0.476	0.101	3.1	-0.375818
8269	150-UNSEP1.gel-no Vit 1.tif:205: I-13	1687	1681	0.965	1.072	-0.052	0.1	0.737	0.151704
11177	160-UNSEP1.gel-no Vit 4.tif:89: D-17	3984	4815	1.11	1.072	0.151	0.101	0.16	-0.0502548
11347	160-UNSEP1.gel-no Vit 4.tif:259: K-19	5979	4813	1.666	1.072	0.736	0.1	0.737	-0.636083
14055	68-UNSEP1.gel-no Vit 4.tif:279: L-15	2002	6924	1.034	1.072	0.048	0.1	0	0.0520687
16795	81-UNSEP1.gel-no Vit 3.tif:331: N-19	2565	4507	1.286	1.072	0.363	0.1	0	-0.262586
20095	96-UNSEP1.gel-no Vit 2.tif:271: L-7	3259	4029	1.144	1.072	0.194	0.1	-0.222	-0.0937821
690	113-UNSEP1.gel-no Vit 4.tif:18: A-18	1882	7200	0.976	1.073	-0.035	0.101	0.837	0.136697
4598	127-UNSEP1-noVit-top.tif:230: J-14	2916	9597	1.044	1.073	0.062	0.102	0.515	0.0395284
9311	153-UNSEP1.gel-no Vit 4.tif:239: J-23	1675	1959	1.172	1.073	0.229	0.102	-0.322	-0.127322
9729	155-UNSEP1.gel-no Vit 5.tif:321: N-9	1531	1876	1.056	1.073	0.078	0.102	-0.322	0.0230402
13137	167-UNSEP1.gel-no Vit 3.tif:33: B-9	2650	7858	0.98	1.073	-0.029	0.102	0.181	0.130796
14099	68-UNSEP1.gel-no Vit 4.tif:323: N-11	2286	6928	1.181	1.073	0.239	0.101	-0.222	-0.138359
17054	84-UNSEP1.gel-no Vit 2.tif:254: K-14	1937	6201	0.998	1.073	-0.002	0.102	1.307	0.104538
20809	98-UNSEP1.gel-no Vit 4.tif:313: N-1	3653	2885	1.202	1.073	0.265	0.101	0	-0.163787
4825	128-UNSEP1-noVit-bot.tif:121: F-1	4120	8624	1.154	1.074	0.206	0.103	0.453	-0.103649
11208	160-UNSEP1.gel-no Vit 4.tif:120: E-24	6974	4824	1.943	1.074	0.959	0.103	0.848	-0.855292
13509	168-UNSEP1.gel-no Vit 2.tif:69: C-21	2895	6721	1.161	1.074	0.216	0.102	0.138	-0.112374
19148	93-UNSEP1.gel-no Vit 6.tif:332: N-20	2286	3096	0.836	1.074	-0.258	0.103	0.918	0.361419
19247	94-UNSEP1.gel-no Vit 1.tif:95: D-23	2206	6266	1.14	1.074	0.19	0.102	0	-0.0860398
1986	118-UNSEP1.gel-no Vit 1.tif:306: M-18	1951	6703	1.066	1.075	0.092	0.104	-0.193	0.0121292
4482	127-UNSEP1-noVit-top.tif:114: E-18	2789	9611	0.999	1.075	-0.002	0.104	0.663	0.10578
4854	128-UNSEP1-noVit-bot.tif:150: G-6	3030	8635	0.848	1.075	-0.237	0.105	0.181	0.3422
5185	129-UNSEP1-noVit-top.tif:145: G-1	8816	10552	2.586	1.075	1.371	0.105	1.27	-1.26639	activator
5661	130-UNSEP1-noVit-bot.tif:285: L-21	3330	9082	0.924	1.075	-0.114	0.105	0.392	0.218372
9031	152-UNSEP1.gel-no Vit 3.tif:295: M-7	1546	1978	1.04	1.075	0.056	0.105	-1	0.0477531
12088	162-UNSEP1.gel-no Vit 2.tif:328: N-16	3024	5098	1.056	1.075	0.078	0.105	0.078	0.0257268
12694	163REP2-UNSEP1.gel-no Vit 1.tif:262: K-22	6028	3357	1.076	1.075	0.105	0.104	1	-0.00134142
14096	68-UNSEP1.gel-no Vit 4.tif:320: N-8	2095	6941	1.082	1.075	0.114	0.104	-0.193	-0.00936384
15300	77-UNSEP.gel-with Vit 1.tif:180: H-12	5201	2131	1.51	1.075	0.594	0.105	0.152	-0.490212
388	111-UNSEP1.gel-no Vit 5.tif:52: C-4	2144	5553	1.118	1.076	0.161	0.106	0.848	-0.0552421
605	111-UNSEP1.gel-no Vit 5.tif:269: L-5	2587	5553	1.349	1.076	0.432	0.106	-0.585	-0.326212
3107	123-UNSEP1-noVit-top.tif:83: D-11	2449	7908	0.843	1.076	-0.247	0.106	1	0.352074
4146	126-UNSEP1-noVit-bot.tif:114: E-18	2258	7546	0.805	1.076	-0.312	0.106	0.152	0.418617
4449	127-UNSEP1-noVit-top.tif:81: D-9	4787	9626	1.714	1.076	0.777	0.106	2.087	-0.671689
5565	130-UNSEP1-noVit-bot.tif:189: H-21	3354	9090	0.93	1.076	-0.104	0.106	0.263	0.210375
6720	142-UNSEP1.gel-no Vit 5.tif:336: N-24	4206	4591	1.007	1.076	0.01	0.105	0.248	0.0956144
11736	161-UNSEP1.gel-no Vit 3.tif:312: M-24	2952	3307	1.255	1.076	0.328	0.105	0.823	-0.222009
12457	163REP2-UNSEP1.gel-no Vit 1.tif:25: B-1	9248	3359	1.65	1.076	0.723	0.105	0.959	-0.616788
18733	92-UNSEP1.gel-no Vit 5.tif:253: K-13	3747	3455	1.085	1.076	0.118	0.106	0.322	-0.012017
2062	120-UNSEP1.gel-no Vit 1.tif:46: B-22	2626	6132	1.345	1.077	0.428	0.107	1.447	-0.320588
2636	121-UNSEP1.gel-no Vit 2-1.tif:284: L-20	1670	10445	0.852	1.077	-0.23	0.107	0	0.338093
4286	126-UNSEP1-noVit-bot.tif:254: K-14	2308	7555	0.823	1.077	-0.281	0.108	0.652	0.388054
7720	145-UNSEP1.gel-no Vit 2.tif:328: N-16	4967	5972	1.137	1.077	0.185	0.107	0.3	-0.078214
9613	155-UNSEP1.gel-no Vit 5.tif:205: I-13	1970	1883	1.358	1.077	0.442	0.107	0	-0.334465
9815	156-UNSEP1.gel-no Vit 3.tif:71: C-23	2085	1651	1.261	1.077	0.334	0.107	3.17	-0.22755
13342	167-UNSEP1.gel-no Vit 3.tif:238: J-22	2818	7889	1.042	1.077	0.059	0.107	0.663	0.047663
15184	77-UNSEP.gel-with Vit 1.tif:64: C-16	5246	2134	1.523	1.077	0.607	0.107	0	-0.499898
17700	88-UNSEP1.gel-no Vit 2-1.tif:228: J-12	2613	5205	1.001	1.077	0.001	0.107	0.193	0.105576
20621	98-UNSEP1.gel-no Vit 4.tif:125: F-5	4061	2896	1.336	1.077	0.418	0.107	1	-0.310902
6187	141-UNSEP1.gel-no Vit 6.tif:139: F-19	2553	6212	0.96	1.078	-0.059	0.108	0.087	0.167251
7640	145-UNSEP1.gel-no Vit 2.tif:248: K-8	3547	5978	0.812	1.078	-0.301	0.109	0.348	0.408806
8967	152-UNSEP1.gel-no Vit 3.tif:231: J-15	1668	1983	1.122	1.078	0.166	0.109	-0.263	-0.0577155
9261	153-UNSEP1.gel-no Vit 4.tif:189: H-21	1641	1967	1.148	1.078	0.199	0.108	-0.263	-0.0907655
7991	146-UNSEP1-noVit-top.tif:263: K-23	3754	10531	1.076	1.079	0.105	0.11	0.363	0.00401679
9320	153-UNSEP1.gel-no Vit 4.tif:248: K-8	1555	1970	1.088	1.079	0.122	0.11	-1.115	-0.0119837
9950	156-UNSEP1.gel-no Vit 3.tif:206: I-14	1607	1655	0.972	1.079	-0.041	0.11	1	0.150667
10338	158-UNSEP1.gel-no Vit 2.tif:258: K-18	1502	2048	0.98	1.079	-0.029	0.11	-1.459	0.138841
11297	160-UNSEP1.gel-no Vit 4.tif:209: I-17	3791	4845	1.056	1.079	0.079	0.11	0	0.031085
12931	166-UNSEP1.gel-no Vit 4.tif:163: G-19	3782	6485	0.873	1.079	-0.195	0.11	0.585	0.305641
1185	114-UNSEP1.gel-no Vit 3.tif:177: H-9	1707	6336	0.95	1.08	-0.075	0.111	0.115	0.185032
6360	141-UNSEP1.gel-no Vit 6.tif:312: M-24	2962	6228	1.114	1.08	0.156	0.112	0.193	-0.0447179
6681	142-UNSEP1.gel-no Vit 5.tif:297: M-9	3965	4612	0.949	1.08	-0.075	0.112	0.1	0.186551
8036	146-UNSEP1-noVit-top.tif:308: M-20	3768	10544	1.08	1.08	0.111	0.112	-0.115	0
13387	167-UNSEP1.gel-no Vit 3.tif:283: L-19	2774	7911	1.026	1.08	0.037	0.111	1.433	0.0740006
13412	167-UNSEP1.gel-no Vit 3.tif:308: M-20	2649	7906	0.98	1.08	-0.03	0.111	0.678	0.140178
13813	68-UNSEP1.gel-no Vit 4.tif:37: B-13	1870	6976	0.966	1.08	-0.05	0.111	0.485	0.160936
19908	96-UNSEP1.gel-no Vit 2.tif:84: D-12	3399	4060	1.193	1.08	0.255	0.111	0.222	-0.143563
1803	118-UNSEP1.gel-no Vit 1.tif:123: F-3	1768	6739	0.966	1.081	-0.05	0.112	-0.322	0.162271
2666	121-UNSEP1.gel-no Vit 2-1.tif:314: N-2	2234	10484	1.14	1.081	0.189	0.113	0.858	-0.0766673
4125	126-UNSEP1-noVit-bot.tif:93: D-21	2341	7577	0.835	1.081	-0.26	0.112	0.17	0.372518
7973	146-UNSEP1-noVit-top.tif:245: K-5	3550	10547	1.017	1.081	0.025	0.112	0.222	0.0880468
8584	151-UNSEP1.gel-no Vit 2-1.tif:184: H-16	1549	1571	1.051	1.081	0.071	0.112	0	0.0406039
9734	155-UNSEP1.gel-no Vit 5.tif:326: N-14	1758	1890	1.212	1.081	0.278	0.112	0.222	-0.165023
11683	161-UNSEP1.gel-no Vit 3.tif:259: K-19	2170	3323	0.923	1.081	-0.116	0.112	1.087	0.227964
12209	163-UNSEP1.gel-no Vit 1.tif:113: E-17	3151	6132	1.102	1.081	0.14	0.112	0.206	-0.0277577
12326	163-UNSEP1.gel-no Vit 1.tif:230: J-14	2719	6136	0.951	1.081	-0.073	0.113	0.3	0.184849
13070	166-UNSEP1.gel-no Vit 4.tif:302: M-14	5522	6499	1.275	1.081	0.351	0.113	1.3	-0.238131
13533	168-UNSEP1.gel-no Vit 2.tif:93: D-21	3164	6766	1.269	1.081	0.344	0.112	0.466	-0.231326
16101	79-UNSEP1.gel-no Vit 5.tif:309: M-21	3036	4478	1.314	1.081	0.394	0.112	0.585	-0.281599
19889	96-UNSEP1.gel-no Vit 2.tif:65: C-17	3336	4064	1.171	1.081	0.228	0.112	1.263	-0.115375
6219	141-UNSEP1.gel-no Vit 6.tif:171: H-3	2868	6238	1.079	1.082	0.109	0.114	-0.093	0.00400563
6983	143-UNSEP1.gel-no Vit 4.tif:263: K-23	6181	4024	1.195	1.082	0.257	0.114	0.07	-0.14331
7506	145-UNSEP1.gel-no Vit 2.tif:114: E-18	4979	6000	1.14	1.082	0.189	0.114	0.115	-0.0753333
13410	167-UNSEP1.gel-no Vit 3.tif:306: M-18	2564	7921	0.948	1.082	-0.077	0.113	0.848	0.190742
14054	68-UNSEP1.gel-no Vit 4.tif:278: L-14	1834	6987	0.947	1.082	-0.078	0.113	-0.322	0.192264
14723	74-UNSEP1.gel-no Vit 3.tif:275: L-11	2050	5641	1.125	1.082	0.17	0.114	0.322	-0.0562245
1755	118-UNSEP1.gel-no Vit 1.tif:75: D-3	2219	6751	1.213	1.083	0.278	0.115	0.9	-0.163546
3280	123-UNSEP1-noVit-top.tif:256: K-16	2954	7957	1.017	1.083	0.024	0.115	0.193	0.0907136
5407	130-UNSEP1-noVit-bot.tif:31: B-7	3162	9144	0.877	1.083	-0.189	0.115	1	0.304384
7086	144-UNSEP1.gel-no Vit 3.tif:30: B-6	4189	5541	1.091	1.083	0.125	0.116	0.138	-0.0106179
8896	152-UNSEP1.gel-no Vit 3.tif:160: G-16	1579	1992	1.062	1.083	0.087	0.115	-0.126	0.0282495
11221	160-UNSEP1.gel-no Vit 4.tif:133: F-13	3463	4865	0.965	1.083	-0.051	0.116	0	0.166432
13460	168-UNSEP1.gel-no Vit 2.tif:20: A-20	2566	6780	1.029	1.083	0.042	0.115	1.042	0.0737903
20030	96-UNSEP1.gel-no Vit 2.tif:206: I-14	3267	4072	1.147	1.083	0.198	0.115	0.222	-0.0828321
9732	155-UNSEP1.gel-no Vit 5.tif:324: N-12	1529	1895	1.054	1.084	0.076	0.116	0.222	0.0404899
10352	158-UNSEP1.gel-no Vit 2.tif:272: L-8	1605	2057	1.047	1.084	0.067	0.117	-0.778	0.0501033
11794	162-UNSEP1.gel-no Vit 2.tif:34: B-10	2833	5138	0.989	1.084	-0.016	0.116	0.547	0.132322
12352	163-UNSEP1.gel-no Vit 1.tif:256: K-16	2507	6150	0.876	1.084	-0.19	0.116	0.363	0.307362
13974	68-UNSEP1.gel-no Vit 4.tif:198: I-6	1813	6999	0.936	1.084	-0.095	0.116	-0.193	0.211784
2964	122-UNSEP1-noVit-bot.tif:276: L-12	2239	5835	0.912	1.085	-0.133	0.118	0.678	0.250589
7472	145-UNSEP1.gel-no Vit 2.tif:80: D-8	4803	6016	1.099	1.085	0.137	0.118	0.737	-0.0184963
7804	146-UNSEP1-noVit-top.tif:76: D-4	3161	10589	0.906	1.085	-0.143	0.118	0.531	0.260112
13113	167-UNSEP1.gel-no Vit 3.tif:9: A-9	2923	7942	1.081	1.085	0.112	0.117	0.585	0.00532852
13936	68-UNSEP1.gel-no Vit 4.tif:160: G-16	1954	7008	1.009	1.085	0.013	0.118	-0.222	0.104769
15209	77-UNSEP.gel-with Vit 1.tif:89: D-17	4580	2150	1.329	1.085	0.411	0.117	0	-0.292646
18021	89-UNSEP1.gel-no Vit 3.tif:213: I-21	3577	4304	1.115	1.085	0.157	0.117	-0.322	-0.0393487
6072	141-UNSEP1.gel-no Vit 6.tif:24: A-24	2737	6262	1.029	1.086	0.042	0.119	0.1	0.0777811
6677	142-UNSEP1.gel-no Vit 5.tif:293: M-5	3699	4637	0.886	1.086	-0.175	0.119	0	0.293645
8369	150-UNSEP1.gel-no Vit 1.tif:305: M-17	1769	1703	1.011	1.086	0.016	0.119	2.322	0.103241
9667	155-UNSEP1.gel-no Vit 5.tif:259: K-19	1720	1899	1.186	1.086	0.246	0.119	-0.222	-0.12708
11590	161-UNSEP1.gel-no Vit 3.tif:166: G-22	2296	3338	0.976	1.086	-0.035	0.119	0.652	0.154071
11706	161-UNSEP1.gel-no Vit 3.tif:282: L-18	2236	3340	0.951	1.086	-0.073	0.119	1.67	0.191507
11891	162-UNSEP1.gel-no Vit 2.tif:131: F-11	2613	5149	0.912	1.086	-0.133	0.119	0.585	0.251918
16520	81-UNSEP1.gel-no Vit 3.tif:56: C-8	2271	4567	1.139	1.086	0.187	0.119	0.688	-0.0687436
19300	94-UNSEP1.gel-no Vit 1.tif:148: G-4	1536	6339	0.794	1.086	-0.333	0.119	1.115	0.451813
20032	96-UNSEP1.gel-no Vit 2.tif:208: I-16	3506	4083	1.231	1.086	0.3	0.119	-0.322	-0.180807
1994	118-UNSEP1.gel-no Vit 1.tif:314: N-2	1953	6776	1.067	1.087	0.094	0.12	0.663	0.0267918
4566	127-UNSEP1-noVit-top.tif:198: I-6	4200	9717	1.504	1.087	0.589	0.12	0.322	-0.468453
5611	130-UNSEP1-noVit-bot.tif:235: J-19	3092	9178	0.858	1.087	-0.221	0.12	0.794	0.341302
8960	152-UNSEP1.gel-no Vit 3.tif:224: J-8	1563	1999	1.051	1.087	0.072	0.12	-0.585	0.0485893
9068	152-UNSEP1.gel-no Vit 3.tif:332: N-20	1725	2000	1.16	1.087	0.214	0.121	-0.379	-0.0937729
9213	153-UNSEP1.gel-no Vit 4.tif:141: F-21	1768	1984	1.237	1.087	0.307	0.12	-0.7	-0.186494
9342	153-UNSEP1.gel-no Vit 4.tif:270: L-6	1486	1984	1.04	1.087	0.056	0.12	-1.737	0.0637684
11148	160-UNSEP1.gel-no Vit 4.tif:60: C-12	6610	4883	1.842	1.087	0.881	0.121	0.678	-0.760921
11310	160-UNSEP1.gel-no Vit 4.tif:222: J-6	3579	4880	0.997	1.087	-0.004	0.12	0.284	0.124687
11842	162-UNSEP1.gel-no Vit 2.tif:82: D-10	2798	5153	0.977	1.087	-0.034	0.12	0.184	0.153921
12861	166-UNSEP1.gel-no Vit 4.tif:93: D-21	6338	6535	1.464	1.087	0.55	0.121	0.939	-0.429564
13029	166-UNSEP1.gel-no Vit 4.tif:261: K-21	4461	6532	1.03	1.087	0.043	0.12	1.212	0.0777076
13291	167-UNSEP1.gel-no Vit 3.tif:187: H-19	2380	7957	0.88	1.087	-0.184	0.12	0.485	0.304777
14429	70-UNSEP1.gel-no Vit 4.tif:317: N-5	2070	5345	1.04	1.087	0.057	0.12	0	0.0637684
16076	79-UNSEP1.gel-no Vit 5.tif:284: L-20	2182	4505	0.944	1.087	-0.083	0.121	0	0.203493
19835	96-UNSEP1.gel-no Vit 2.tif:11: A-11	3511	4085	1.233	1.087	0.302	0.12	-0.263	-0.181821
20123	96-UNSEP1.gel-no Vit 2.tif:299: M-11	3343	4086	1.174	1.087	0.231	0.12	-0.263	-0.11108
526	111-UNSEP1.gel-no Vit 5.tif:190: H-22	1840	5613	0.959	1.088	-0.06	0.122	0	0.182076
10047	156-UNSEP1.gel-no Vit 3.tif:303: M-15	1526	1668	0.923	1.088	-0.116	0.122	-2	0.237276
12399	163-UNSEP1.gel-no Vit 1.tif:303: M-15	2723	6176	0.952	1.088	-0.071	0.122	0.181	0.192645
12905	166-UNSEP1.gel-no Vit 4.tif:137: F-17	3878	6542	0.896	1.088	-0.159	0.122	0.628	0.280108
18077	89-UNSEP1.gel-no Vit 3.tif:269: L-5	3488	4315	1.087	1.088	0.121	0.121	0	0.00132662
19888	96-UNSEP1.gel-no Vit 2.tif:64: C-16	3700	4091	1.299	1.088	0.378	0.122	-0.193	-0.255723
20128	96-UNSEP1.gel-no Vit 2.tif:304: M-16	3193	4092	1.121	1.088	0.165	0.122	0	-0.0431077
3357	123-UNSEP1-noVit-top.tif:333: N-21	3278	8003	1.128	1.089	0.174	0.123	2.078	-0.0507631
[truncated: 8,711 more rows]
