# Supplementary material for: The Mars1 kinase confers photoprotection through signaling in the chloroplast unfolded protein response
Source: eLife. 2019 Oct 15;8:e49577. doi: 10.7554/eLife.49577 (PMC6794094; doi:10.7554/eLife.49577)
Supplement: Figure 4—figure supplement 1—source data 1. [file elife-49577-fig4-figsupp1-data1.xlsx]

## Sheet: Data source fig4 sup 1A
High light assay 2019_02_24
CHLOROPHYLL CALCULATIONS according Porra et al., 1989
Cell were inoculed on 2_22_2019 at 7pm from restreak dated 02_18_2019
before dilution 8.30pm 2.24.2019 t0h	Line	medium	652 nm	665 nm	a	b	a/b	total µg/ml	dilution	ug/ul	Chlorophyll	dilute factor to 8 µg/ml	culture for 8µg/ml in 31 ml	TAP in 31 ml
WT	1	TAP	0.556	0.922	10.2711	4.5262	2.26926	14.7973	1	14.7973	14.7973	1.84967	16.7598	14.2402
mars1-3	2	TAP	0.385	0.65	7.3006	2.9771	2.45225	10.2777	1	10.2777	10.2777	1.28471	24.1299	6.87009
mars1-3: MARS1-D	3	TAP	0.588	0.972	10.8124	4.82832	2.23936	15.6407	1	15.6407	15.6407	1.95508	15.8561	15.1439
mars1-3: MARS1-D KD	4	TAP	0.438	0.739	8.29779	3.39346	2.44523	11.6913	1	11.6913	11.6913	1.46141	21.2124	9.78755
after dilution 9pm 2.24.2019 t0h	Line	medium	652 nm	665 nm	a	b	a/b	total µg/ml
WT	L	TAP	0.338	0.561	6.25217	2.7447	2.27791	8.99687
mars1-3	O1	TAP	0.365	0.612	6.85238	2.87994	2.37935	9.73232
mars1-3: MARS1-D	R	TAP	0.304	0.506	5.64658	2.44916	2.30552	8.09574
mars1-3: MARS1-D KD	E	TAP	0.339	0.567	6.34137	2.69388	2.35399	9.03525
12.30pm 2.25.2019 t15h	Line	medium	652 nm	665 nm	a	b	a/b	total µg/ml
WT	R	TAP	0.899	1.448	15.9105	7.8995	2.01411	23.81
mars1-3	O	TAP	0.614	0.997	10.9976	5.28598	2.08052	16.2836
mars1-3: MARS1-D	S	TAP	0.922	1.454	15.8118	8.5232	1.85515	24.335
mars1-3: MARS1-D KD	A	TAP	0.324	0.556	6.29028	2.38336	2.63925	8.67364
5.30pm 2.25.2019 t20h	Line	medium	652 nm	665 nm	a	b	a/b	total µg/ml
WT	R	TAP	1.079	1.562	16.2303	11.8702	1.36732	28.1005
mars1-3	O	TAP	0.179	0.223	2.10401	2.4598	0.855358	4.56381
mars1-3: MARS1-D	S	TAP	0.909	1.331	13.9191	9.79496	1.42105	23.7141
mars1-3: MARS1-D KD	A	TAP	0.0035	0.03	0.45881	-0.30009	-1.52891	0.15872
9am 2.26.2019 36h	Line	medium	652 nm	665 nm	a	b	a/b	total µg/ml
WT	R	TAP	1.037	1.498	15.5464	11.4516	1.35758	26.998
mars1-3	O	TAP	0.007	0.022	0.2986	-0.08414	-3.54885	0.21446
mars1-3: MARS1-D	S	TAP	0.664	0.96	9.96784	7.32144	1.36146	17.2893
mars1-3: MARS1-D KD	A	TAP	0.006	0.021	0.29085	-0.10122	-2.87344	0.18963
3pm 2.26.2019 42h	Line	medium	652 nm	665 nm	a	b	a/b	total µg/ml
WT	R	TAP	0.74	1.114	11.8275	7.56028	1.56442	19.3877
mars1-3	O	TAP	0.002	0.001	-0.00079	0.04774	-0.016548	0.04695
mars1-3: MARS1-D	S	TAP	0.197	0.294	3.10688	2.0475	1.5174	5.15438
mars1-3: MARS1-D KD	A	TAP	0.001	0.01	0.15436	-0.10514	-1.46814	0.04922
9am 2.27.2019 72h	Line	medium	652 nm	665 nm	a	b	a/b	total µg/ml
WT	R	TAP	0.004	0.008	0.09616	0.014	6.86857	0.11016
mars1-3	O	TAP	0	0	0	0	#DIV/0!	0
mars1-3: MARS1-D	S	TAP	0.002	0.002	0.0155	0.03416	0.453747	0.04966
mars1-3: MARS1-D KD	A	TAP	0	0	0	0	#DIV/0!	0
chlorophyll (mg/ml)
strain	0	15	20	36	42	48	hours
WT	8.99687	23.81	28.1005	26.998	19.3877	0.11016
mars1-3	9.73232	16.2836	4.56381	0.21446	0.04695	0
mars1-3: MARS1-D	8.09574	24.335	23.7141	17.2893	5.15438	0.04966
mars1-3: MARS1-D KD	9.03525	8.67364	0.15872	0.18963	0.04922	0
