# Supplementary material for: The Mars1 kinase confers photoprotection through signaling in the chloroplast unfolded protein response
Source: eLife. 2019 Oct 15;8:e49577. doi: 10.7554/eLife.49577 (PMC6794094; doi:10.7554/eLife.49577)
Supplement: Figure 5—figure supplement 2—source data 1. [file elife-49577-fig5-figsupp2-data1.xlsx]

## Sheet: Sheet1
Cre16.g692228.t1.1.v5.5
	LL	HL 40min	HL 70min	ClpP OFF
WT	9.65576	17.1116	59.5453	18.8793
mars1-1	3.83181	3.54039	3.7953	3.2878
