# Supplementary material for: The Mars1 kinase confers photoprotection through signaling in the chloroplast unfolded protein response
Source: eLife. 2019 Oct 15;8:e49577. doi: 10.7554/eLife.49577 (PMC6794094; doi:10.7554/eLife.49577)
Supplement: Supplementary file 1. [file elife-49577-supp1.xlsx]

## Sheet: General Info
	mars1-3:MARS1-D (TAP + MZ)	mars1-3:MARS1-D KD (TAP + MZ)
Description	>Cre16.g692228.t1.1	>Cre16.g692228.t1.1
# of spectra	41	16
# of unique peptides	31	12
# of mod peptides	13	4
Coverage %	25.46	15.27

## Sheet: spectra MARS1-A
Peptide	Modification Type(s)
R.GVLYTSDGGGGTSANGEDGDPNDDYFGVQTPPTR.S
R.SSS[+79.966]GKGLGPPQALHR.Q	S[+80]
K.GLGPPQALHR.Q
R.LTEYLPSGYSTPDR.N
R.AVS[+79.966]VEGEPAAGAPLLYPSFITHLAAGEVVPSGPVHPTPSR.G	S[+80]
R.AVS[+79.966]VEGEPAAGAPLLYPSFITHLAAGEVVPSGPVHPTPSR.G	S[+80]
R.AVS[+79.966]VEGEPAAGAPLLYPSFITHLAAGEVVPSGPVHPTPSR.G	S[+80]
R.AVS[+79.966]VEGEPAAGAPLLYPSFITHLAAGEVVPSGPVHPTPSR.G	S[+80]
R.VGEAVVAAAGELRDR.G
R.WLRDALAEALR.Y
R.LSQGVVNGLLSIRR.Q
R.VAPVAAHAGASGR.A
R.RAPGAAAPAPASALVAGTTAGLGR.R
R.RAPGAAAPAPASALVAGTTAGLGR.R
R.SSFEAGEPSPSER.A
R.Q[-17.027]QEQLAAAAASEGRPAASTGQKPAASSAVATTSSSTSTAR.R	Q[-17]
R.Q[-17.027]QEQLAAAAASEGRPAASTGQKPAASSAVATTSSSTSTAR.R	Q[-17]
R.Q[-17.027]QEQLAAAAASEGRPAASTGQKPAASSAVATTSSSTSTAR.R	Q[-17]
R.LDRGDDDNGYAEENQPSAIGAASNSEQLEHGR.Q
R.LDRGDDDNGYAEENQPSAIGAASNSEQLEHGR.Q
R.LDRGDDDN[+0.984]GYAEENQPSAIGAASNSEQLEHGR.Q	N[+1]
G.AAGM[+15.995]AIADAAGPAEGAWTAVASGGAHQR.Q	M[+16]
R.Q[-17.027]LHQQTQPHQQTQAR.T	Q[-17]
R.TGHTARPGQGPGLVGTGPK.A
R.TASLTAQVSLGPGGLGPAAPAVADLTR.Q
R.TASLTAQVSLGPGGLGPAAPAVADLTR.Q
R.TASLTAQVS[+79.966]LGPGGLGPAAPAVADLTR.Q	S[+80]
R.LNNHPNIVR.F
R.QAGLLTDADLVHTR.W
R.Q[-17.027]AGLLTDADLVHTR.W	Q[-17]
K.VC[+71.037]DFNLSR.V	C[+71]
R.HAGGAPASGGASSLTVPNSGNM[+15.995]YSPR.W	M[+16]
R.HAGGAPASGGASSLTVPNSGNM[+15.995]YSPR.W	M[+16]
R.HAGGAPAS[+79.966]GGASSLTVPNSGNM[+15.995]YSPR.W	M[+16], S[+80]
K.VLEPVFIHEEVVTK.N
R.LAFPDPAALEQELPELPQLVALC[+71.037]GR.C	C[+71]
R.RPAAEGGPSAAQQPGTTAAAATAAAAAGASNTATPAVAMVPTLAATMPALPGAPAR.G
R.RPAAEGGPSAAQQPGTTAAAATAAAAAGASNTATPAVAM[+15.995]VPTLAATM[+15.995]PALPGAPAR.G	M[+16]*2
R.GTNTPTSPFAR.A
R.AVPSPFAASASPAPPPLPSPFKTEQ.-
R.AVPSPFAASASPAPPPLPSPFKTEQ.-

## Sheet: spectra MARS1-A KD
Peptide	Modification Type(s)
R.GVLYTSDGGGGTSAN[+0.984]GEDGDPNDDYFGVQTPPTR.S	N[+1]
R.AVSVEGEPAAGAPLLYPSFITHLAAGEVVPSGPVHPTPSR.G
R.RAPGAAAPAPASALVAGTTAGLGR.R
R.SSFEAGEPSPSER.A
R.RQQEQLAAAAASEGRPAASTGQKPAASSAVATTSSSTSTAR.R
R.RQQEQLAAAAASEGRPAASTGQKPAASSAVATTSSSTSTAR.R
R.RQQEQLAAAAASEGRPAASTGQKPAASSAVATTSSSTSTAR.R
R.QQEQLAAAAASEGRPAASTGQKPAASSAVATTSSSTSTAR.R
R.QQEQLAAAAASEGRPAASTGQKPAASSAVATTSSSTSTAR.R
R.TASLTAQVSLGPGGLGPAAPAVADLTR.Q
R.HAGGAPASGGASSLTVPNSGNM[+15.995]YSPR.W	M[+16]
R.HAGGAPASGGASSLTVPNSGNM[+15.995]YSPR.W	M[+16]
K.VLEPVFIHEEVVTK.N
R.LAFPDPAALEQELPELPQLVALC[+71.037]GR.C	C[+71]
R.RPAAEGGPSAAQQPGTTAAAATAAAAAGASNTATPAVAM[+15.995]VPTLAATM[+15.995]PALPGAPAR.G	M[+16]*2
R.AVPSPFAASASPAPPPLPSPFKTEQ.-
