# Supplementary material for: The Mars1 kinase confers photoprotection through signaling in the chloroplast unfolded protein response
Source: eLife. 2019 Oct 15;8:e49577. doi: 10.7554/eLife.49577 (PMC6794094; doi:10.7554/eLife.49577)
Supplement: Supplementary file 2. [file elife-49577-supp2.xlsx]

## Sheet: Blad1
	rpkm.WT.t0	rpkm.WT.t40 HL	rpkm.WT.t70 HL	rpkm.WT.ClpP OFF	rpkm.mars1.t0	rpkm.mars1.t40 HL	rpkm.mars1.t70 HL	rpkm.mars1.ClpP OFF
Cre01.g000017.t1.1.v5.5	1.9389	3.6436	5.567	6.23411	11.5495	8.4272	7.29457	7.24097
Cre01.g000033.t1.1.v5.5	0.568519	0.538952	3.32443	0.387788	6.67471	1.36804	3.32012	4.06449
Cre01.g000050.t1.1.v5.5	2.07875	2.82833	0.161485	2.96685	1.31629	1.93078	1.32598	2.19614
Cre01.g000100.t1.1.v5.5	0.68599	1.51352	0.216743	1.20387	1.29072	1.29084	1.42963	1.56401
Cre01.g000150.t1.2.v5.5	0.200868	1.32236	0.0823558	0.197467	0.421878	0.396513	0.297815	0.0998799
Cre01.g000200.t1.1.v5.5	2.52537	4.23033	13.4383	6.74555	3.6236	3.9225	3.94889	4.27231
Cre01.g000250.t1.2.v5.5	9.0307	25.1203	158.76	9.85302	11.2217	24.1095	48.0825	8.65148
Cre01.g000300.t1.1.v5.5	11.8547	47.5182	575.812	22.9836	12.1875	47.649	116.034	6.31936
Cre01.g000350.t1.1.v5.5	31.3057	47.6835	75.7082	37.7423	18.9626	39.4123	30.1182	13.5186
Cre01.g000400.t1.2.v5.5	3.26306	3.20658	0.895027	5.72167	1.61046	1.86402	3.26576	3.73504
Cre01.g000450.t1.2.v5.5	1.53261	4.18175	0.694515	3.75687	1.90732	3.98482	2.14167	4.28273
Cre01.g000500.t1.1.v5.5	3.22547	5.0695	0.442852	0.767074	4.28497	5.98785	4.42649	2.45937
Cre01.g000550.t1.2.v5.5	0.0243653	0.0177412	0.143476	0.145179	0.0476639	0.0242991	0.034937	0.180673
Cre01.g000600.t1.2.v5.5	10.5584	15.1364	0.476837	8.95578	5.41773	7.62106	3.02126	7.97233
Cre01.g000650.t1.1.v5.5	1.9264	28.7193	111.63	7.27395	2.62043	24.2047	46.4155	1.28502
Cre01.g000700.t1.1.v5.5	0.434503	1.52019	0.673817	0.835199	0.42783	1.09021	1.37828	0.737019
Cre01.g000750.t1.1.v5.5	2.99062	1.92113	2.40405	2.0854	5.30078	2.44682	3.49734	2.59662
Cre01.g000850.t1.2.v5.5	32.4389	74.9644	77.5637	31.0805	54.4521	78.5541	96.4006	31.8939
Cre01.g000900.t1.2.v5.5	43.4301	16.9606	9.85933	6.61402	53.6265	21.9553	23.1299	24.8911
Cre01.g000950.t1.1.v5.5	0.101692	0.200048	0.0297719	0.287395	0.107484	0.148023	0.41691	0.288515
Cre01.g001000.t1.1.v5.5	0.697106	0	0.527105	0.696082	0.539222	0.112221	0.869672	1.52419
Cre01.g001100.t1.2.v5.5	20.9813	20.0211	11.0271	21.1297	30.9129	38.9626	28.0809	27.7213
Cre01.g001150.t1.1.v5.5	1.83311	1.27852	0.835913	2.04876	2.47903	2.04331	2.12958	1.5602
Cre01.g001200.t1.1.v5.5	9.42998	0.90079	0.424548	1.56362	23.5308	2.58267	8.95679	8.71609
Cre01.g001250.t1.2.v5.5	0.865502	0.364555	0.182981	0.299924	2.46021	0.566781	0.618246	0.915336
Cre01.g001300.t1.1.v5.5	0.96881	0.660482	0.160284	0.84504	2.09106	0.732608	0.780729	0.96414
Cre01.g001350.t1.2.v5.5	0.850359	0.759047	0.434846	0.978375	0.618624	0.838438	0.657214	1.39059
Cre01.g001400.t1.1.v5.5	13.4426	4.87052	37.7697	5.14259	7.00487	18.0534	10.1812	7.65291
Cre01.g001450.t1.2.v5.5	3.43151	0.244643	1.42916	2.08949	1.69736	0.228043	1.12703	2.26041
Cre01.g001501.t1.1.v5.5	1.65273	1.24671	0.0929917	0.982418	1.30584	1.28389	1.28452	0.919718
Cre01.g001550.t1.1.v5.5	21.794	47.0838	11.1762	10.2843	17.4647	45.0737	34.8442	11.124
Cre01.g001600.t1.2.v5.5	7.56784	0.332201	0.0979821	2.16284	6.78614	0.262498	1.74046	3.77429
Cre01.g001650.t1.2.v5.5	0.849379	0.556982	0.342959	0.324448	1.28364	0.675068	0.56234	0.560632
Cre01.g001657.t1.1.v5.5	8.06249	11.354	4.18447	8.88956	17.4188	16.1082	21.4424	12.8847
Cre01.g001664.t1.1.v5.5	0.592955	7.18827	0.614413	2.22592	1.85253	9.14758	2.00419	3.32734
Cre01.g001700.t1.1.v5.5	3.89044	0.668867	0.78082	0.887667	1.80772	0.811676	1.49362	0.59557
Cre01.g001750.t1.2.v5.5	43.5448	36.5825	1.9847	23.0165	29.4395	23.2304	13.7065	19.1347
Cre01.g001800.t1.1.v5.5	8.01609	3.26693	0.960642	4.07143	6.68391	4.64375	2.74238	2.94184
Cre01.g001950.t1.2.v5.5	3.52666	3.74933	4.52618	3.8186	1.90616	9.7507	4.89599	3.54784
Cre01.g002050.t1.1.v5.5	0.569283	7.82095	28.3572	3.43775	1.28973	13.4541	10.0459	2.61925
Cre01.g002100.t1.2.v5.5	1.03042	3.54401	6.03598	2.32244	2.2898	4.45463	2.29174	2.98588
Cre01.g002150.t1.2.v5.5	1.00419	0.0255019	1.55165	1.36484	1.99819	0.505152	1.58122	4.27313
Cre01.g002200.t1.1.v5.5	32.1112	47.6236	12.4077	24.4702	21.7351	27.9332	14.9161	20.9827
Cre01.g002203.t1.1.v5.5	0.0601688	0	0.0117436	0.237623	0.028265	0.0137244	0.0236436	0.0771879
Cre01.g002227.t1.2.v5.5	3.53801	3.09358	0.5389	3.23612	2.49106	2.35306	1.52464	2.87729
Cre01.g002250.t1.2.v5.5	9.76189	39.6705	7.82159	7.88812	4.04748	34.2072	21.0586	3.80643
Cre01.g002300.t1.2.v5.5	578.061	251.398	646.323	246.252	586.026	236.944	740.197	360.619
Cre01.g002350.t1.1.v5.5	5.09012	9.01158	6.4695	6.76388	5.54246	6.34188	6.0405	5.5258
Cre01.g002400.t1.1.v5.5	5.33049	13.3502	2.33372	3.27233	3.7903	21.5577	16.0693	4.74922
Cre01.g002451.t1.1.v5.5	3.5757	7.77246	1.35577	1.73818	1.45367	11.6396	6.70886	1.59537
Cre01.g002500.t1.2.v5.5	486.88	75.8746	242.279	166.46	327.973	74.7049	223.003	144.162
Cre01.g002550.t1.1.v5.5	15.9245	2.78623	10.3393	4.51352	18.6231	4.11207	5.80387	4.82338
Cre01.g002600.t1.2.v5.5	0.394953	0.0680615	0.170198	0.173766	1.25163	0.127206	0.264662	0.221807
Cre01.g002700.t1.2.v5.5	0.979446	0.614484	1.13951	1.44117	0.824993	1.02326	2.44277	1.15642
Cre01.g002787.t1.1.v5.5	1.02331	0.943758	0.473878	2.70367	2.30438	1.80859	2.88411	1.50835
Cre01.g002824.t1.1.v5.5	1.18311	0.938074	0.284528	2.15358	1.82853	1.75052	2.22142	1.42372
Cre01.g002861.t1.1.v5.5	1.7516	1.0899	0.596643	3.34942	2.33963	1.99741	2.76077	2.53461
Cre01.g002900.t1.2.v5.5	27.157	1.15723	0.96363	1.47286	13.9541	1.25081	1.83662	3.31711
Cre01.g002950.t1.1.v5.5	6.24477	2.11197	1.14929	3.8285	8.558	2.49464	4.67381	5.85263
Cre01.g003000.t1.1.v5.5	0.575659	0.37015	0.141017	1.50056	0.710668	0.614235	0.761794	1.52068
Cre01.g003050.t1.2.v5.5	1.12679	0.862317	2.95142	1.57013	0.766593	14.7769	8.10589	1.4139
Cre01.g003150.t1.2.v5.5	0.666164	9.9067	4.70848	3.59792	1.22584	10.2771	3.36992	3.40052
Cre01.g003200.t1.2.v5.5	1.41587	1.40272	0.437138	2.03528	4.09715	1.88209	2.44942	6.15301
Cre01.g003376.t1.1.v5.5	3.47781	18.2538	0.819018	8.1261	1.92371	10.4656	1.87244	3.80586
Cre01.g003463.t1.1.v5.5	2.47276	2.95829	1.14135	5.39073	3.92139	3.37532	4.36565	6.80777
Cre01.g003475.t1.1.v5.5	0.0425082	0.311904	0.115798	0.319888	0.152924	0.0900461	0.283558	0.373075
Cre01.g003487.t1.1.v5.5	3.21206	3.66117	1.34061	3.47616	3.30973	4.91621	2.97217	3.424
Cre01.g003500.t1.2.v5.5	1.80755	0.348882	0.475248	1.33451	2.87856	0.359034	1.91251	1.36656
Cre01.g003508.t1.1.v5.5	3.11369	0.694509	0.0957435	0.481754	4.13814	1.49882	2.27413	0.946023
Cre01.g003516.t1.1.v5.5	5.31808	1.18636	0.218218	0.980847	9.94104	2.11091	4.29056	3.2902
Cre01.g003524.t1.1.v5.5	12.9605	4.30243	1.37356	3.89112	13.5335	5.39389	4.06921	4.51413
Cre01.g003532.t1.1.v5.5	1.94426	0.406131	0.213143	0.636809	2.7434	0.574421	0.967561	0.940936
Cre01.g003541.t1.1.v5.5	0.0187041	0.497119	1.04921	0.395438	0.23146	0.204038	0.315255	0.199584
Cre01.g003550.t1.1.v5.5	2.73465	6.35025	1.93237	2.43818	3.90612	20.6422	16.5875	5.42836
Cre01.g003600.t1.2.v5.5	0.0621256	0.0938033	1.11378	0	0	0.371286	0.16924	0.0959143
Cre01.g003700.t1.2.v5.5	0.474422	0.946369	0.34236	1.52084	0.667605	1.10791	1.21988	1.42245
Cre01.g003751.t1.1.v5.5	1.47904	1.10214	1.64725	0.743436	1.82004	1.5121	2.21458	0.791267
Cre01.g003800.t1.1.v5.5	3.39733	1.27861	0.370296	1.28967	4.61038	2.96368	2.90184	1.83907
Cre01.g003826.t1.1.v5.5	13.4496	3.68182	1.78794	3.83098	27.5489	8.58771	10.1218	9.37319
Cre01.g003850.t1.1.v5.5	14.683	0.12967	0.0461234	2.9057	13.6276	0.118602	0.305592	8.96627
Cre01.g004000.t1.2.v5.5	23.4112	20.0941	74.0618	13.121	10.9916	6.85792	18.1305	9.19818
Cre01.g004157.t1.2.v5.5	7.27352	0.59651	0.116184	1.24031	31.4899	1.15126	2.91813	12.3299
Cre01.g004200.t1.2.v5.5	4.35005	0.720376	0.625806	1.75549	4.62972	1.69075	2.17704	2.20918
Cre01.g004250.t1.2.v5.5	61.6551	5.54669	9.39703	11.8209	65.8727	13.9794	21.5317	27.1695
Cre01.g004300.t1.2.v5.5	168.777	181.498	572.439	185.023	81.1375	99.2418	46.2872	69.9195
Cre01.g004350.t1.2.v5.5	6.6542	13.0668	94.0068	11.5884	8.00875	18.8383	17.5119	6.53495
Cre01.g004400.t1.2.v5.5	25.8306	1.4445	12.2311	13.8779	5.87888	4.06322	4.65303	11.3229
Cre01.g004450.t1.2.v5.5	60.6235	137.89	181.598	50.531	72.0567	178.076	200.298	57.6695
Cre01.g004500.t1.2.v5.5	123.872	348.903	1922.54	457.201	102.251	151.044	162.971	53.5521
Cre01.g004550.t1.2.v5.5	9.54396	0.435909	0.590649	1.94798	11.6848	1.98867	2.26676	3.10824
Cre01.g004600.t1.1.v5.5	1.334	1.67022	4.59431	2.22224	4.08775	9.13577	5.37372	3.26626
Cre01.g004651.t1.1.v5.5	20.3826	4.93006	24.8283	8.38777	11.4522	10.6994	9.31929	9.1601
Cre01.g004700.t1.2.v5.5	23.0648	1.8834	2.2329	3.54073	11.9986	2.18803	5.85183	8.66652
Cre01.g004750.t1.1.v5.5	0.522974	0.464947	0	0.0601854	0.547534	0.00763463	0.0413025	0.0273319
Cre01.g004800.t1.2.v5.5	64.8723	73.0014	314.425	78.5046	42.0497	23.0141	28.4877	60.5055
Cre01.g004850.t1.1.v5.5	0.963195	3.41106	2.35304	1.45467	1.09837	3.9548	4.02734	1.2561
Cre01.g004900.t1.2.v5.5	20.5064	45.092	840.254	34.7894	31.5926	40.8602	112.403	7.06362
Cre01.g004926.t1.1.v5.5	0	0.511626	3.36642	0.0860918	0	0.149627	0.250366	0
Cre01.g004950.t1.1.v5.5	34.512	30.5602	133.287	32.9548	42.6019	36.3392	38.0007	32.0608
Cre01.g005001.t1.1.v5.5	13.566	29.2278	90.9689	18.5985	13.5857	21.7955	23.3733	15.529
Cre01.g005050.t1.1.v5.5	62.4437	99.9066	28.7503	59.2439	62.9955	110.603	52.2561	79.6483
Cre01.g005100.t1.1.v5.5	2.06511	4.65685	1.17137	2.11244	4.24035	4.6362	3.75056	3.26458
Cre01.g005150.t1.1.v5.5	14.6531	12.4964	65.8174	10.7109	30.7	70.6238	110.663	8.46067
Cre01.g005200.t1.1.v5.5	0.454137	1.31339	0.362377	2.29882	1.02713	2.01675	1.53633	1.93294
Cre01.g005400.t1.1.v5.5	0.405774	0.0798644	0.0337321	0.0270214	0.86349	0.0465344	0.202764	0.188477
Cre01.g005450.t1.2.v5.5	49.6104	3.98703	3.73391	7.17327	50.0793	5.45556	8.70369	15.2028
Cre01.g005500.t1.2.v5.5	4.76043	1.79448	0.442217	4.48489	3.94589	1.82173	4.01425	4.65438
Cre01.g005534.t1.2.v5.5	3.45779	1.39251	1.01515	2.89993	1.2527	0.410726	1.2535	2.02017
Cre01.g005550.t1.2.v5.5	8.78612	5.66956	2.17292	7.97549	5.15123	1.1437	4.31476	3.3691
Cre01.g005600.t1.1.v5.5	1.25198	2.24795	0.740571	2.10131	1.51475	1.76616	2.75182	1.79517
Cre01.g005813.t1.2.v5.5	5.02579	5.03256	2.44165	2.60468	3.54243	1.72851	1.5597	2.90745
Cre01.g005850.t1.2.v5.5	3.27206	295.946	13.7129	9.48101	5.38636	68.1739	21.2467	9.0851
Cre01.g005900.t1.1.v5.5	5.87052	7.12673	17.0559	4.31522	3.98958	7.19292	8.08036	7.435
Cre01.g005950.t1.2.v5.5	17.6634	3.84558	9.20287	11.4166	14.2829	0.645414	2.99773	24.3294
Cre01.g006000.t1.1.v5.5	1.32062	0.829295	5.22576	2.30097	0.929771	1.9312	6.18818	1.15964
Cre01.g006050.t1.1.v5.5	2.9537	1.90317	2.06764	3.14159	5.0479	3.20704	5.06356	5.29212
Cre01.g006100.t1.2.v5.5	2.98313	29.0604	1.7308	5.86923	1.51042	22.4613	7.32175	6.20557
Cre01.g006150.t1.1.v5.5	7.94592	19.5249	7.2588	8.8622	4.64048	19.7719	15.15	5.83737
Cre01.g006301.t1.1.v5.5	0.593714	0.708394	2.96206	0.539183	0.868901	1.22115	1.57883	0.882161
Cre01.g006766.t1.1.v5.5	0.0542665	0.0979254	0.176182	0.0793053	0.212648	0.079243	0.124679	0.0447947
Cre01.g006800.t1.1.v5.5	3.34438	3.0231	2.02258	3.66672	3.73745	1.83548	3.94157	4.24351
Cre01.g006850.t1.2.v5.5	13.8246	13.8708	12.9564	5.07332	12.8387	6.48014	7.50497	10.3315
Cre01.g006950.t2.1.v5.5	0.567656	0.735384	2.1694	0.812373	1.62445	0.886968	0.503457	0.213583
Cre01.g007000.t1.2.v5.5	2.40691	2.54777	1.30902	1.94969	3.13539	2.03029	3.7768	2.91252
Cre01.g007050.t1.2.v5.5	7.05742	26.4547	19.5163	8.40938	6.10863	19.2987	17.5561	6.95645
Cre01.g007051.t1.2.v5.5	2424.06	2652.12	5811.61	856.408	3450.95	1361.63	2408.2	1305.2
Cre01.g007100.t1.1.v5.5	0.796163	2.69375	1.74823	1.7524	1.45491	2.38985	2.18494	1.87566
Cre01.g007150.t1.1.v5.5	1.17288	4.52132	2.27785	3.50255	2.57833	4.02073	2.71651	2.89735
Cre01.g007200.t1.2.v5.5	14.9654	27.6976	73.8695	12.97	17.6257	19.1123	14.5671	11.35
Cre01.g007251.t1.1.v5.5	2.84458	0.0325704	0.142118	0.567838	5.00016	0.0112015	0.0411864	1.54109
Cre01.g007300.t1.2.v5.5	0.252178	3.40215	11.1768	9.44727	0.250488	0.739679	0.992666	1.38521
Cre01.g007350.t1.2.v5.5	9.8968	0.0808604	7.47171	7.20508	6.02259	1.43816	4.63123	16.6623
Cre01.g007400.t1.1.v5.5	1.15917	2.06539	0.154937	1.38665	0.902649	1.05948	1.46992	1.49613
Cre01.g007550.t1.1.v5.5	0.684477	1.37792	0.400329	2.23226	0.913295	1.58601	2.61106	2.47541
Cre01.g007651.t1.1.v5.5	4.49786	1.81221	0.0635445	4.90186	3.94001	0.555409	0.79355	3.83638
Cre01.g007700.t1.1.v5.5	11.928	36.3557	19.0625	6.74996	6.06044	42.9091	47.6677	4.39817
Cre01.g007737.t1.1.v5.5	3.24217	9.10676	7.83796	4.7363	7.40601	36.1722	41.5299	7.73451
Cre01.g007774.t1.1.v5.5	8.9873	9.61414	3.27359	14.6886	10.4656	7.19519	8.92028	10.6393
Cre01.g007811.t1.1.v5.5	1.06795	0.328673	1.75276	1.98058	0.523598	1.4915	1.01035	1.54263
Cre01.g007850.t1.2.v5.5	124.497	88.4233	124.006	62.1843	134.088	91.4752	96.4268	86.3156
Cre01.g007901.t3.1.v5.5	4.54001	8.43041	24.3635	4.61902	9.48641	7.67401	13.9465	5.34532
Cre01.g007950.t1.1.v5.5	118.029	31.9965	5.41543	13.4384	236.273	1.44136	7.95029	47.241
Cre01.g008000.t1.2.v5.5	2.0123	2.61797	0.887607	2.51695	1.01561	1.41079	2.08051	1.92739
Cre01.g008051.t1.1.v5.5	1.55706	2.40409	1.4699	2.75893	5.53504	4.02842	4.72228	4.82666
Cre01.g008100.t1.2.v5.5	12.1658	1.954	0.500754	3.3116	6.07051	0.524065	0.976537	2.91199
Cre01.g008150.t1.1.v5.5	2.78136	2.26226	4.6609	2.96019	3.67417	8.78569	3.44711	2.38431
Cre01.g008200.t1.1.v5.5	0.516856	0.587921	0.0800681	0.942195	0.779562	0.646332	0.701399	1.0086
Cre01.g008250.t1.2.v5.5	0.0123404	0.0429062	0	0.0533028	0.0747476	0.0150898	0.0653391	0.652288
Cre01.g008350.t1.1.v5.5	0.285207	0.467167	2.08483	0.254302	0.117363	0.0522377	0.151112	0.513872
Cre01.g008402.t1.1.v5.5	0.512291	0.166632	0.387314	1.19549	0.196137	0.0948923	0.0737067	0.315341
Cre01.g008450.t1.2.v5.5	1.38724	0.0100135	2.02599	1.81121	0.995494	0.297946	0.76352	2.35792
Cre01.g008500.t1.2.v5.5	4.63407	0.425589	0.213494	1.10097	2.40895	1.07373	2.08984	2.10248
Cre01.g008550.t1.1.v5.5	6.4337	8.4261	5.4462	6.22966	4.72102	10.1597	5.92369	8.49437
Cre01.g008600.t1.1.v5.5	0.898285	1.98267	0.178664	1.90327	1.04746	2.72248	1.50764	2.12137
Cre01.g008650.t1.1.v5.5	4.11117	6.18583	21.5744	2.93228	7.04421	6.94988	9.81395	3.84078
Cre01.g008700.t1.2.v5.5	3.81456	1.70117	5.04559	2.90726	5.0423	1.6678	1.9669	1.63584
Cre01.g008750.t1.2.v5.5	0	0.0222304	0	0.0430209	0.0246334	0	0.00733845	0.212202
Cre01.g008800.t1.1.v5.5	3.12544	2.0563	0.765625	1.5107	9.27729	1.26362	2.91499	5.91385
Cre01.g008850.t1.1.v5.5	4.36009	5.07832	2.75634	5.99966	5.69249	4.47756	5.04379	5.21473
Cre01.g008891.t1.2.v5.5	2.34411	0.85334	2.14761	1.77531	1.10825	0.996586	2.69022	1.71095
Cre01.g008950.t2.1.v5.5	0.346447	0.118698	0.654326	0.218788	0.0996819	0.0357976	0.0780657	0.215223
Cre01.g009000.t1.1.v5.5	3.27342	3.7931	0.362855	3.60226	4.51276	1.96147	2.51595	3.28347
Cre01.g009025.t1.1.v5.5	0.940953	0.792959	0.736534	0.702896	0.396467	0.52213	0.468452	0.544705
Cre01.g009101.t1.1.v5.5	15.1561	3.47305	13.2358	2.50816	3.69175	5.11051	0.880473	2.9492
Cre01.g009150.t1.1.v5.5	0.415357	5.18629	48.9237	3.61324	0.0839288	1.48263	0.841996	0.443031
Cre01.g009200.t1.2.v5.5	5.79679	0.389258	1.49012	1.15491	2.5948	0.660176	0.796979	1.44842
Cre01.g009250.t1.1.v5.5	4.14311	0.017279	2.99115	4.10141	3.36668	1.15253	3.40998	7.65528
Cre01.g009300.t1.1.v5.5	7.56088	17.8576	91.6735	16.5753	6.91619	18.3867	14.1992	6.94404
Cre01.g009325.t1.1.v5.5	0.0226711	0.0189225	0.0847938	0.0662448	0.0379312	0	0.0784495	0.298763
Cre01.g009350.t1.2.v5.5	0.347855	12.9052	133.786	19.1412	1.14027	39.2042	40.4243	3.72082
Cre01.g009400.t1.2.v5.5	0	0.232176	0.165403	0.0209998	0	0.226108	0.084044	0.00494106
Cre01.g009450.t1.1.v5.5	1.56953	2.37015	1.61092	1.91062	2.60183	3.61922	4.88629	2.0181
Cre01.g009500.t1.2.v5.5	3.12778	0.368293	0.426668	0.648885	4.99572	1.37398	3.00066	2.61026
Cre01.g009550.t1.1.v5.5	1.91654	3.76454	9.91292	3.42983	1.4005	2.2905	2.01075	1.40656
Cre01.g009575.t1.1.v5.5	0.0542735	0.161616	1.0731	0.169456	0.170449	0.288594	0.552294	0.309254
Cre01.g009650.t1.2.v5.5	0.427185	0.865446	2.65034	2.09413	0.803871	4.92129	4.65381	1.61553
Cre01.g009676.t1.1.v5.5	1.00735	1.84583	7.11568	4.3224	1.85982	8.39138	10.0781	4.18353
Cre01.g009700.t1.1.v5.5	1.87949	0.401862	0.72203	1.52781	1.73667	0.9009	1.48619	2.03829
Cre01.g009731.t1.2.v5.5	0.166707	0.227629	0.0281338	0.811561	0.445593	0.416658	0.506957	0.549142
Cre01.g009765.t1.1.v5.5	0.116597	0	0	0.0166793	0.286	0.0289595	0.0177982	0.0525645
Cre01.g009800.t1.2.v5.5	14.7262	0.671949	1.113	1.47311	15.9843	2.97999	1.56739	3.24135
Cre01.g009850.t1.2.v5.5	8.16732	0.9356	0.430688	1.2727	11.0493	2.79565	2.87578	3.82181
Cre01.g009900.t1.1.v5.5	11.319	27.8244	21.5927	14.1207	11.841	16.4841	19.4205	7.45984
Cre01.g009950.t1.2.v5.5	31.3372	33.7688	2.52817	30.7491	14.0766	11.2139	6.1157	16.1498
Cre01.g010000.t1.2.v5.5	12.9909	10.2176	13.7547	16.4604	8.75004	6.81105	7.66237	10.3566
Cre01.g010050.t1.1.v5.5	4.35397	3.27923	10.067	4.89128	4.05706	1.94745	2.99142	2.66186
Cre01.g010100.t1.2.v5.5	3.51443	3.45935	35.0953	4.14378	7.32787	9.76648	14.0428	9.62836
Cre01.g010150.t1.2.v5.5	1.68002	2.96336	3.22878	2.90853	2.19009	3.08184	2.65576	2.49357
Cre01.g010201.t1.1.v5.5	1.56454	4.86526	0.732301	6.18013	3.81153	6.51614	3.00131	4.88833
Cre01.g010250.t1.1.v5.5	0.69684	1.42822	0.317353	1.38397	2.72301	2.87798	2.25097	3.10013
Cre01.g010296.t1.1.v5.5	1.04004	0	0.599378	2.16462	1.32089	0.351623	2.25479	6.8718
Cre01.g010300.t1.2.v5.5	0.939143	0.0324216	0.70773	1.26667	1.28534	0.547938	1.9521	2.11942
Cre01.g010350.t1.2.v5.5	6.92545	6.78802	6.75093	4.51239	4.91266	4.70326	5.49193	4.18973
Cre01.g010400.t1.2.v5.5	68.9399	96.7216	10.7187	98.3513	323.55	129.756	86.1633	305.704
Cre01.g010450.t1.2.v5.5	49.0915	105.939	83.2194	24.6682	38.9707	94.9638	50.0481	36.1376
Cre01.g010500.t1.2.v5.5	4.60093	14.8277	4.92832	8.85484	8.34133	12.6787	12.5134	10.8935
Cre01.g010650.t1.2.v5.5	0.447407	0.347684	0.261362	0.706592	0.769401	0.789067	1.00892	0.829865
Cre01.g010700.t1.2.v5.5	6.82865	15.1966	51.5935	7.27962	5.92474	10.446	9.89895	2.86509
Cre01.g010750.t1.2.v5.5	6.20344	5.31759	31.3367	5.32305	10.6914	45.3263	29.2429	5.74328
Cre01.g010800.t1.1.v5.5	2.87759	4.59635	9.47189	2.70133	3.37849	5.68282	2.4407	2.23891
Cre01.g010816.t1.1.v5.5	1.11249	0.285261	2.60371	0.908235	0.773113	0.910666	1.02732	1.29996
Cre01.g010832.t1.1.v5.5	24.662	1.9963	0.0844086	0.247538	6.5153	0.889219	0.42255	2.57191
Cre01.g010848.t1.1.v5.5	5.92938	22.3419	3.35514	6.61433	2.55732	27.8936	17.4584	7.48883
Cre01.g010864.t1.1.v5.5	1.02071	2.71642	0.29072	1.33793	0.438473	3.30533	2.30502	1.05964
Cre01.g010880.t1.1.v5.5	2.94058	0.659392	0.651456	2.0775	1.9125	1.08539	1.70735	2.09021
Cre01.g010900.t1.2.v5.5	2962.41	2841.1	3658.2	657.101	3248.34	3283.32	2681.41	805.436
Cre01.g010950.t1.1.v5.5	2.89255	6.83461	42.4945	5.02887	3.90371	12.5011	9.10944	2.57421
Cre01.g011000.t1.2.v5.5	2967.54	2833.22	7341.76	1504.54	4039.41	1424.68	2566.37	1558.65
Cre01.g011050.t1.2.v5.5	13.3243	29.6651	58.6629	24.8059	11.4883	20.5405	16.6808	12.3682
Cre01.g011200.t1.2.v5.5	5.60421	6.81962	1.51291	6.88642	3.75099	4.89528	7.41131	7.56631
Cre01.g011250.t1.1.v5.5	1.11224	0	1.00665	0.51577	0.474613	0.0363222	0.209096	0.608476
Cre01.g011300.t1.1.v5.5	5.53255	5.05593	1.61194	6.96762	1.94587	14.4486	13.5486	8.3055
Cre01.g011350.t1.2.v5.5	5.37984	9.16315	7.09582	6.11541	4.50832	7.82839	4.75518	5.37367
Cre01.g011376.t1.1.v5.5	0.182426	0.0282887	0.126765	0.117412	0.567064	0.50607	0.218251	0.598587
Cre01.g011450.t1.1.v5.5	13.7335	9.28927	18.5515	6.71296	12.3189	9.7561	8.93155	7.17093
Cre01.g011500.t1.2.v5.5	16.3497	90.8888	282.362	50.5738	29.5349	77.4135	62.808	32.7018
Cre01.g011550.t1.1.v5.5	0.0490579	0.0947376	0.729279	0.149947	0.274167	0.173799	0.217656	0.0936362
Cre01.g011600.t1.2.v5.5	4.39069	3.63754	15.5634	2.71383	1.98247	4.67476	4.98195	2.96113
Cre01.g011750.t1.1.v5.5	3.73999	4.13784	19.2888	3.07936	4.66034	3.77918	7.93825	2.41214
Cre01.g011800.t1.1.v5.5	0.578883	0.0732405	0.198721	0.557435	0.289379	0.0666112	0.30767	0.389589
Cre01.g011901.t1.1.v5.5	1.29459	0.317107	6.1699	2.01875	2.68654	1.44022	0.755863	0.939447
Cre01.g011950.t1.1.v5.5	1.86492	0.485678	2.11327	2.55258	1.16513	1.45385	1.28094	1.36492
Cre01.g012000.t1.1.v5.5	1.92713	0.580156	1.47475	2.33604	2.05383	1.93415	2.74027	2.11898
Cre01.g012150.t1.2.v5.5	84.6011	56.9548	35.9851	43.2579	43.6464	32.4476	51.6431	29.6878
Cre01.g012175.t1.1.v5.5	0.632591	0.521368	1.00784	0.398592	2.35611	0.988426	1.0965	1.98554
Cre01.g012244.t1.2.v5.5	31.0138	63.1042	53.669	27.4765	31.4071	42.8039	33.0589	31.4949
Cre01.g012300.t1.1.v5.5	28.8255	20.8803	44.5476	15.8381	23.718	19.3263	17.5621	16.6322
Cre01.g012350.t1.2.v5.5	13.2913	6.11962	0.19472	8.04409	7.47944	4.27404	1.16056	6.45564
Cre01.g012400.t1.2.v5.5	3.09746	8.36148	8.12551	2.64978	6.43188	3.99504	8.0087	2.967
Cre01.g012450.t1.1.v5.5	6.02958	4.5092	14.9227	9.73507	9.68722	5.85119	9.66888	7.09304
Cre01.g012500.t1.2.v5.5	21.0757	133.442	380.843	30.9134	18.6766	178.892	85.4467	38.9703
Cre01.g012550.t1.1.v5.5	0.102506	0.394933	0.890165	0.227942	0.642689	0.745686	0.248672	0.758671
Cre01.g012600.t1.1.v5.5	1.23444	1.05629	0.41971	2.61501	1.13045	1.11941	1.49438	1.85801
Cre01.g012750.t1.1.v5.5	1.22645	0.183202	0.0307644	0.881819	2.81596	0.255925	0.36629	2.00221
Cre01.g012800.t1.1.v5.5	0.0940303	0.0289763	0.0212473	0.0228373	0.203542	0.0150607	0.0636742	0.12561
Cre01.g012850.t1.2.v5.5	0.272753	0.102066	0.0125909	0.167262	0.6799	0.0579654	0.0425919	0.173303
Cre01.g012900.t1.1.v5.5	1.83008	2.55222	3.29086	4.45222	3.56713	2.41872	3.1428	3.20993
Cre01.g013000.t1.1.v5.5	2.67637	1.35103	2.23006	1.78485	2.81871	1.53827	6.79986	1.71371
Cre01.g013050.t1.1.v5.5	4.25399	3.38146	7.56614	4.70181	3.73806	2.43494	14.3051	1.50837
Cre01.g013100.t1.1.v5.5	30.9794	13.6408	2.36889	7.16641	1.89301	3.15893	3.5206	12.1437
Cre01.g013150.t1.2.v5.5	10.0667	17.674	132.869	25.3527	19.1401	14.7302	25.0565	19.0271
Cre01.g013200.t1.2.v5.5	5.74923	29.3888	54.222	24.8707	12.2771	46.3955	30.6774	22.1548
Cre01.g013250.t1.1.v5.5	5.4025	4.09458	3.03578	6.4541	3.79227	2.17921	5.18213	5.65944
Cre01.g013300.t1.1.v5.5	13.2955	19.063	17.9567	13.9113	11.6691	11.5345	10.2155	10.6235
Cre01.g013350.t1.2.v5.5	52.0009	2.00325	8.32453	30.4474	57.9719	0.759242	6.35656	70.9981
Cre01.g013400.t1.1.v5.5	3.22647	1.7412	0.135363	2.54953	1.8466	1.44261	1.44663	3.00233
Cre01.g013450.t1.2.v5.5	0.535072	1.20886	0.052217	0.586	1.25511	0.6978	0.522927	2.74346
Cre01.g013550.t1.1.v5.5	2.98798	2.56383	3.07043	3.23516	3.16936	3.44807	3.56552	3.58773
Cre01.g013600.t1.1.v5.5	12.2082	23.0273	23.0129	16.6625	12.5137	29.8596	11.4057	14.203
Cre01.g013650.t1.1.v5.5	3.29751	3.4091	4.77813	3.42954	0.97623	3.54394	1.61631	2.29095
Cre01.g013750.t1.1.v5.5	1.4657	2.11315	0.984735	3.05938	1.74007	2.8596	2.77496	3.10522
Cre01.g013769.t1.2.v5.5	2.03948	3.17118	0.857817	4.17261	1.00398	2.90526	2.04234	2.38793
Cre01.g013800.t1.1.v5.5	3.50425	3.7169	0.283758	3.7017	2.6881	2.92949	1.72936	2.77917
Cre01.g013801.t1.2.v5.5	4.27729	8.18198	4.77227	2.60805	8.03705	8.60498	7.49094	3.10214
Cre01.g013850.t1.1.v5.5	3.24998	3.33649	1.5846	2.13561	2.49572	2.23498	3.59962	2.8512
Cre01.g014000.t1.2.v5.5	63.4933	112.704	55.7153	51.3592	47.4724	77.3105	37.7345	60.2326
Cre01.g014050.t1.2.v5.5	18.9583	53.8293	176.395	38.3397	10.2521	27.578	11.523	9.59101
Cre01.g014100.t1.2.v5.5	0.939587	12.5196	4.77039	1.8047	1.34131	7.53826	1.30245	1.64778
Cre01.g014150.t1.2.v5.5	3.51518	6.44645	21.2019	4.26667	2.93728	5.57947	8.42393	4.3912
Cre01.g014200.t1.2.v5.5	0.545347	0.0201404	0.190721	0.479971	0.292236	0.00607408	0.0729043	0.864585
Cre01.g014250.t1.1.v5.5	6.72293	0.16422	0.358363	3.56418	5.98266	0.313798	1.22856	8.14971
Cre01.g014350.t1.2.v5.5	21.4055	208.386	46.7579	54.111	41.2525	128.854	66.7494	70.6364
Cre01.g014400.t1.1.v5.5	1.46591	8.91799	3.27245	4.48701	1.1138	4.03658	2.72226	4.22708
Cre01.g014450.t1.1.v5.5	3.64307	2.02469	1.12997	2.29913	7.97322	1.96358	4.00733	2.88405
Cre01.g014500.t1.1.v5.5	3.68221	3.53316	2.85784	4.91811	5.38526	4.3776	3.88093	5.43811
Cre01.g014600.t1.2.v5.5	12.6773	14.3922	8.15551	7.20231	6.49274	15.4144	15.1131	8.03721
Cre01.g014650.t1.2.v5.5	17.9108	15.6141	10.9083	10.5564	17.5956	21.3055	14.632	14.5824
Cre01.g014700.t1.2.v5.5	11.5662	13.6664	26.9115	11.7162	9.97284	11.9055	11.3529	6.42995
Cre01.g014800.t1.1.v5.5	3.23205	8.11858	9.24754	3.82966	3.11041	9.32588	8.37608	2.52785
Cre01.g014850.t1.2.v5.5	2.89295	13.9575	47.2525	9.19657	6.50524	17.8208	12.3901	7.06879
Cre01.g014900.t1.1.v5.5	2.3007	2.46544	8.36336	2.55023	3.69923	2.61361	5.39551	2.61766
Cre01.g015000.t1.2.v5.5	18.143	18.4773	4.64411	13.3687	11.9179	10.5851	12.0729	11.2437
Cre01.g015050.t1.1.v5.5	3.879	4.40806	3.07141	5.16931	5.97788	4.72915	4.40318	4.67879
Cre01.g015100.t1.1.v5.5	1.38214	0.788713	1.21327	1.09651	0.664896	0.753615	0.683816	1.32429
Cre01.g015103.t1.2.v5.5	3.4153	10.1719	5.78205	3.87475	3.65893	4.0097	4.83542	2.9896
Cre01.g015150.t1.2.v5.5	1.57799	4.25754	1.54835	2.2932	1.54726	2.35119	2.62076	2.67293
Cre01.g015200.t1.1.v5.5	0.580522	0.79047	0.777067	1.20603	1.0168	0.634005	0.893416	1.225
Cre01.g015250.t1.1.v5.5	2.2002	1.44141	2.23216	5.92002	1.87693	1.8534	2.22202	6.42301
Cre01.g015300.t1.1.v5.5	1.23298	0.929222	0.242393	1.49963	0.881113	1.19038	0.696074	1.46142
Cre01.g015350.t1.1.v5.5	157.087	53.0118	160.737	38.6389	60.3046	55.097	52.3542	108.955
Cre01.g015400.t1.2.v5.5	15.2847	18.4753	133.844	18.7774	13.7208	11.8094	24.4101	6.9193
Cre01.g015451.t1.1.v5.5	0.351544	0.269661	0.316497	0.357738	0.0848711	0.164438	0.159214	0.46161
Cre01.g015500.t1.2.v5.5	16.0567	60.2542	230.847	19.1365	21.8698	83.4975	52.4402	12.9696
Cre01.g015550.t1.1.v5.5	2.60464	3.3986	5.25885	4.79797	0.683268	2.70564	4.08943	1.9912
Cre01.g015600.t1.1.v5.5	8.6683	7.96481	1.31046	9.78978	6.858	9.21688	6.3686	8.35449
Cre01.g015650.t1.2.v5.5	15.2677	6.57647	1.01193	13.9331	8.68246	3.50566	1.83837	10.5693
Cre01.g015700.t1.2.v5.5	7.2997	4.33247	2.72238	7.3889	2.35465	3.25854	6.20934	3.78403
Cre01.g015750.t1.2.v5.5	14.6217	5.53262	19.6232	13.0682	9.56332	4.71118	15.2464	8.17913
Cre01.g015850.t1.1.v5.5	24.3228	0.984876	0.784497	1.84183	27.727	4.55325	3.53455	6.59096
Cre01.g015950.t1.2.v5.5	71.5177	31.1215	499.369	59.8978	57.2312	8.53521	24.5418	16.681
Cre01.g016001.t1.1.v5.5	0.406718	0.51604	0.0887252	0.808328	0.244052	0.436009	0.440399	0.499273
Cre01.g016050.t1.2.v5.5	38.9313	66.9643	29.1523	54.3149	32.9883	42.6787	26.3668	32.2675
Cre01.g016150.t1.2.v5.5	5.79157	150.421	105.729	12.7995	5.12494	73.5355	73.5594	5.21864
Cre01.g016200.t1.1.v5.5	0.418348	1.49282	3.23988	0.795851	0.255253	1.63677	1.32973	0.235872
Cre01.g016250.t1.1.v5.5	0.183073	1.35162	2.34999	0.611374	0.216588	0.926008	0.652687	0.140549
Cre01.g016300.t1.1.v5.5	104.666	51.2504	989.414	78.573	147.777	98.9938	133.973	39.6871
Cre01.g016350.t1.1.v5.5	21.7028	10.676	89.5168	7.85631	15.9316	11.797	18.1148	10.4072
Cre01.g016400.t1.1.v5.5	16.3948	2.92043	2.89453	1.56969	5.56471	2.01659	3.75114	2.88628
Cre01.g016450.t1.1.v5.5	0.329907	1.85558	0.333533	1.526	0.908617	2.42918	1.38007	1.67631
Cre01.g016500.t1.1.v5.5	61.9294	23.5432	28.314	21.6468	81.4996	35.3537	66.1416	39.7368
Cre01.g016514.t1.1.v5.5	48.5898	19.3834	25.5905	14.42	31.5937	25.1705	39.2642	13.6587
Cre01.g016528.t1.1.v5.5	11.2096	33.7031	15.0243	12.1854	6.73756	20.5839	10.1769	7.70129
Cre01.g016556.t1.1.v5.5	33.4038	12.1049	10.424	17.3644	34.2119	10.1758	18.6785	19.8788
Cre01.g016570.t1.1.v5.5	1.88647	1.35941	2.83822	2.63446	2.7115	5.22392	5.91895	2.57739
Cre01.g016600.t1.2.v5.5	0.0429592	116.815	7.08072	0.169105	0.0244567	27.2519	12.3029	0.111683
Cre01.g016700.t1.1.v5.5	1.81221	3.365	39.4329	3.66166	11.2181	5.67045	9.77326	6.28858
Cre01.g016750.t1.2.v5.5	0.0964053	283.574	14.6375	0.359153	0.105946	67.134	34.4604	0.0722547
Cre01.g016800.t1.1.v5.5	1.52153	0.527597	0.976903	0.89251	1.78892	0.691498	0.893062	2.11295
Cre01.g016850.t1.2.v5.5	79.9767	315.855	677.581	114.927	90.6651	226.329	138.258	69.6654
Cre01.g016900.t1.2.v5.5	97.4487	57.0125	129.467	42.0644	105.895	94.6296	131.506	53.1578
Cre01.g016950.t1.2.v5.5	10.8624	14.0938	129.944	20.0023	7.79791	3.08532	7.23686	6.09918
Cre01.g017050.t1.2.v5.5	11.1828	14.2512	129.38	16.633	12.6147	2.13752	8.667	5.48292
Cre01.g017100.t1.1.v5.5	1.10257	9.8216	4.7729	3.51081	1.09398	5.92028	4.91521	1.96792
Cre01.g017150.t1.1.v5.5	0.340359	0.0191654	0.383408	0.681881	0.778493	0.240013	0.647647	0.879343
Cre01.g017200.t1.2.v5.5	4.45052	8.47441	34.4335	4.60806	3.02658	6.21786	5.95621	3.38547
Cre01.g017250.t1.2.v5.5	4.27452	5.6763	2.97246	4.01336	1.47732	4.65702	2.11143	2.73551
Cre01.g017300.t1.2.v5.5	398.434	503.426	484.053	199.609	319.24	461.011	433.554	190.235
Cre01.g017350.t1.1.v5.5	1.52578	3.31789	0.94739	1.81987	1.54447	3.09893	2.75969	3.30959
Cre01.g017450.t1.1.v5.5	1.16645	0.746265	6.13556	2.68305	1.39638	1.3514	2.17044	3.99751
Cre01.g017500.t1.2.v5.5	17.9154	63.2783	493.834	43.057	14.2479	41.1708	50.6173	10.2924
Cre01.g017550.t1.1.v5.5	0.92728	1.21368	1.2284	0.437853	2.84911	2.77522	1.36084	2.7208
Cre01.g017750.t1.1.v5.5	0.496415	1.76815	4.70562	1.05313	0.811865	2.191	2.115	1.07421
Cre01.g017850.t1.2.v5.5	0.37213	0.688963	3.6317	2.46792	0.602132	0.928625	0.741588	1.60503
Cre01.g017900.t1.1.v5.5	0.20894	0.371923	0.0919273	0.269319	0.21018	0.308236	0.210031	0.293555
Cre01.g017951.t1.1.v5.5	1.11821	4.93106	1.68075	0.797722	2.03733	3.54257	1.31006	2.43533
Cre01.g018000.t1.1.v5.5	10.8299	18.4539	0.920881	11.7292	5.13808	9.69903	3.26304	9.79684
Cre01.g018050.t1.2.v5.5	1.24728	5.83828	2.49605	4.13582	2.66829	9.88908	4.82311	5.5488
Cre01.g018075.t1.1.v5.5	8.66465	1.10818	2.29212	1.46334	3.76888	1.72982	2.0918	2.92761
Cre01.g018100.t1.2.v5.5	1.98794	6.01472	1.26255	5.27979	2.00103	4.29742	2.65001	3.47848
Cre01.g018150.t1.2.v5.5	17.8055	7.46901	8.01824	6.55233	19.7426	8.93845	9.15911	13.0535
Cre01.g018184.t1.2.v5.5	0.311938	0.334652	0.286403	0.923837	0	0.373357	0.227246	0.610018
Cre01.g018200.t1.1.v5.5	3.54721	6.4553	3.3234	6.14267	3.35691	4.77987	3.10798	4.38045
Cre01.g018350.t1.2.v5.5	4.14495	9.93855	12.9564	7.54895	3.88499	7.50799	3.88704	4.74881
Cre01.g018400.t1.1.v5.5	12.1103	10.0395	18.4345	9.67259	16.9535	9.99053	11.1448	8.39484
Cre01.g018450.t1.1.v5.5	2.79237	2.18206	0.473696	3.34686	2.11383	1.3149	2.64627	3.73529
Cre01.g018500.t1.1.v5.5	6.55324	4.11414	5.8173	3.06644	7.18297	3.28879	5.23609	1.84818
Cre01.g018550.t1.1.v5.5	2.65133	2.2816	0.764439	2.26857	4.414	3.71012	2.83959	3.91653
Cre01.g018600.t1.2.v5.5	14.7331	21.8027	43.919	39.2361	18.0977	33.0714	36.6235	32.8912
Cre01.g018650.t1.1.v5.5	29.1523	4.50546	5.00205	16.2193	21.3635	3.80518	6.99336	14.4414
Cre01.g018700.t1.1.v5.5	7.95511	0.691528	0.311565	0.789728	6.31873	1.59926	2.32787	2.15325
Cre01.g018750.t1.2.v5.5	6.19647	0.382541	0.293541	1.13324	7.55544	1.52295	2.21683	2.48087
Cre01.g018800.t1.2.v5.5	284.371	93.5098	86.606	159.353	376.363	72.9654	153.343	238.815
Cre01.g018850.t1.2.v5.5	0.623348	6.45626	47.593	6.52122	1.17932	2.2005	4.87904	1.91075
Cre01.g018900.t1.2.v5.5	2.32126	34.9111	225.307	20.7947	3.01445	7.01056	9.15654	2.84283
Cre01.g018950.t1.2.v5.5	37.1744	40.4534	0.525358	34.6069	13.6104	8.68073	2.4749	23.5037
Cre01.g019000.t1.2.v5.5	5.8935	8.90271	11.906	12.0178	5.24267	6.9383	10.3812	8.73984
Cre01.g019051.t1.1.v5.5	0.255066	0.419205	0.555513	0.417229	0.360603	0.488248	0.584309	0.54608
Cre01.g019100.t1.2.v5.5	1.07729	0.921953	0.136695	1.36608	1.03767	0.39309	0.960368	2.02929
Cre01.g019150.t1.2.v5.5	0.669411	0.163682	1.07704	1.12233	0.483205	0.45829	0.58735	1.33714
Cre01.g019200.t1.1.v5.5	13.1597	10.3659	0.826682	9.68346	5.46184	7.54675	2.305	7.03422
Cre01.g019250.t1.2.v5.5	100.666	56.1738	40.984	64.015	63.1704	28.6162	61.0972	50.6571
Cre01.g019300.t1.1.v5.5	2.69148	1.0169	0.582181	1.11947	4.1116	1.14621	2.39928	1.63592
Cre01.g019500.t1.2.v5.5	2.49855	10.8409	46.8238	5.9929	3.2617	12.404	14.3673	5.96342
Cre01.g019550.t1.2.v5.5	0.135646	0.119685	0.123199	0.0687166	0.277912	0.111564	0.0673778	0.518137
Cre01.g019600.t1.2.v5.5	34.6938	43.4317	13.8831	23.8218	36.5698	32.7692	26.6214	31.4894
Cre01.g019650.t1.1.v5.5	4.04662	4.63011	0.601759	4.9621	6.24459	3.6058	3.24052	5.98425
Cre01.g019700.t1.2.v5.5	0.553126	0.43551	0.562315	1.32172	0.590977	0.959195	1.15517	1.37187
Cre01.g019750.t1.1.v5.5	6.64736	3.7523	5.21247	13.2163	5.36525	4.276	4.78892	6.20746
Cre01.g019850.t1.1.v5.5	12.1828	27.9323	119.914	16.0708	15.6448	17.6981	26.026	7.65875
Cre01.g019900.t1.2.v5.5	5.21666	0.645972	1.74782	0.903626	5.72025	1.44751	1.43458	2.59004
Cre01.g019950.t1.2.v5.5	0.698603	1.72281	123.814	1.12887	2.60402	4.44588	2.17149	2.90833
Cre01.g020050.t1.1.v5.5	2.41535	0.0181835	1.73437	1.24883	1.21924	0.099116	0.439918	1.57081
Cre01.g020141.t1.1.v5.5	3.63789	1.76107	2.50752	4.68397	9.1437	4.14718	5.02914	7.90856
Cre01.g020182.t1.1.v5.5	1.50916	0.850964	0.96487	1.91731	1.32722	1.33123	1.24943	1.68368
Cre01.g020223.t1.1.v5.5	0.0871799	0.114262	0.303793	0.302429	0.285876	0.955711	0.174646	0.201103
Cre01.g020264.t1.1.v5.5	2.1988	5.12612	26.2874	4.80112	2.37279	4.44575	6.37326	2.48919
Cre01.g020305.t1.1.v5.5	147.203	42.2469	70.9618	104.391	213.621	40.4222	73.6242	146.469
Cre01.g020350.t1.2.v5.5	140.756	48.5495	46.539	92.6239	214.097	50.8074	62.7869	123.584
Cre01.g020400.t1.2.v5.5	6.1946	9.21547	1.1237	7.41328	4.89119	6.45131	4.14485	5.9302
Cre01.g020450.t1.2.v5.5	0	0	8.56859	0	0.151509	0.0485652	0.106011	0.138962
Cre01.g020575.t1.1.v5.5	0.665665	0.0760237	124.182	1.47844	0.322902	0.299002	0.448272	0.693105
Cre01.g020650.t1.1.v5.5	3.18825	0.247807	0.122988	0.786345	4.62537	1.33619	1.41797	1.79708
Cre01.g020701.t1.1.v5.5	0.188046	1.39373	12.3859	2.95109	0.309345	1.59183	0.812564	0.327327
Cre01.g020750.t1.2.v5.5	13.0312	19.0799	87.139	22.263	6.50933	6.53133	7.8748	8.33643
Cre01.g020800.t1.2.v5.5	9.45814	1.62662	3.95612	1.38682	14.2395	2.50575	4.54195	3.05296
Cre01.g020850.t1.1.v5.5	0.0847679	0.31399	0.0708342	0.317398	4.11361	0.853149	2.00776	2.07447
Cre01.g020887.t1.2.v5.5	1.57782	1.7796	1.29015	1.33606	0.739195	1.34662	2.7351	1.042
Cre01.g020918.t1.1.v5.5	11.3244	90.9065	541.77	56.9661	13.4574	32.3261	68.9981	14.9623
Cre01.g020950.t1.2.v5.5	32.0508	35.0546	2.40951	26.0926	15.614	15.6058	2.89764	14.4265
Cre01.g021000.t1.1.v5.5	0.612539	0.721524	0.0331489	0.472616	0.714525	0.303086	0.400835	0.868549
Cre01.g021050.t1.2.v5.5	1.82703	11.7285	1.26124	4.77348	4.04862	9.57796	2.405	9.02499
Cre01.g021100.t1.2.v5.5	0.514072	0.839907	0.26331	0.924312	0.713296	0.78146	0.930987	0.889298
Cre01.g021200.t1.2.v5.5	1.27469	2.3222	2.55087	1.78588	0.768673	2.52779	2.02834	1.50107
Cre01.g021251.t1.1.v5.5	15.1368	31.6581	4.95622	11.2835	10.9615	10.0777	11.5522	8.29449
Cre01.g021350.t1.2.v5.5	18.4139	27.009	16.1182	11.1398	7.65273	15.4525	16.64	9.21221
Cre01.g021400.t1.2.v5.5	6.69728	6.80213	24.3228	7.1825	8.75338	7.72977	6.84624	6.42633
Cre01.g021500.t1.1.v5.5	17.561	3.75114	6.60877	11.7278	7.94825	6.12197	5.7429	8.11748
Cre01.g021550.t1.1.v5.5	1.58766	1.58674	0.94302	2.37316	1.48095	1.61539	2.41967	2.42036
Cre01.g021600.t1.2.v5.5	28.2969	221.22	66.5325	49.6532	24.1458	116.366	23.0133	31.7441
Cre01.g021650.t1.2.v5.5	15.4923	16.2965	5.88776	12.2633	9.39382	13.8836	8.37457	9.06531
Cre01.g021700.t1.1.v5.5	14.2366	4.42261	3.20882	3.28221	7.46272	5.05724	4.55362	2.46317
Cre01.g021750.t1.2.v5.5	5.96528	8.19361	12.5605	5.92178	4.25621	8.42467	4.53908	3.97185
Cre01.g021800.t1.2.v5.5	0	3.40538	0.0646222	0.0145251	0	2.42337	1.10103	0.0937622
Cre01.g021850.t1.1.v5.5	0.605476	0.796544	0.371562	1.84461	0.861915	1.19076	1.62392	1.71228
Cre01.g021900.t1.1.v5.5	0.791489	0.53182	0.203771	1.40804	0.428205	0.293253	0.710128	0.807138
Cre01.g021950.t1.1.v5.5	2.37231	0.390443	0.380188	1.23465	3.26777	0.460368	1.06974	1.13718
Cre01.g022000.t1.1.v5.5	0.113505	0.0117376	0.261915	0.656638	0.369305	0.228546	0.456507	1.07731
Cre01.g022100.t1.2.v5.5	3.36012	4.2177	65.4499	9.96264	5.29674	4.28326	7.99202	3.25096
Cre01.g022150.t1.1.v5.5	0.469322	0.0211433	0.174082	0.200789	1.02954	0.116892	0.346569	0.439634
Cre01.g022200.t1.2.v5.5	30.4731	6.54046	93.4452	8.71073	12.1159	11.2866	6.45121	10.5235
Cre01.g022250.t1.1.v5.5	8.14017	12.1352	4.83929	5.95046	7.48353	11.2927	6.68698	6.82449
Cre01.g022350.t1.2.v5.5	4.0953	4.41829	0.649954	5.69809	2.55706	2.50967	0.877153	2.57997
Cre01.g022400.t1.1.v5.5	0.299051	2.97206	1.07021	1.44952	0.580195	2.44251	1.13633	1.2985
Cre01.g022450.t1.1.v5.5	1.1444	0.695874	0.322488	1.01706	0.710286	0.914427	0.717372	0.582576
Cre01.g022462.t1.2.v5.5	1.46611	1.30462	0.419735	1.85892	2.12037	1.26308	1.76556	2.08911
Cre01.g022500.t1.2.v5.5	2.2946	1.45792	4.73274	3.45234	2.204	4.51097	6.94416	3.33313
Cre01.g022550.t1.1.v5.5	1.00703	0.215639	1.44099	2.09737	1.23664	2.20289	2.40513	2.64497
Cre01.g022600.t1.1.v5.5	0.0775735	0.14873	0.143615	0.088275	0.0370957	0.180662	0.25841	0.0694453
Cre01.g022650.t1.2.v5.5	8.71553	18.5352	115.262	15.2521	15.8339	12.5448	42.6404	11.151
Cre01.g022666.t1.1.v5.5	0.463222	0.656597	0.726133	2.25098	0.421687	0.75438	0.850445	1.64914
Cre01.g022700.t1.1.v5.5	0.0531674	0.117198	0.257	0.110183	1.18361	3.57115	2.67885	1.65435
Cre01.g022750.t1.1.v5.5	3.5547	0.462513	0.382435	1.38839	5.89976	3.02471	2.88902	2.0623
Cre01.g022800.t1.1.v5.5	2.95788	2.54602	3.35348	3.23209	1.23153	2.96019	2.87414	2.16639
Cre01.g022850.t1.2.v5.5	2.21088	0.0136027	2.40799	2.51218	1.15349	0.378117	1.06097	2.86363
Cre01.g022900.t1.1.v5.5	0.206189	0.164602	0.114689	0.353419	0.175876	0.102601	0.203576	0.478708
Cre01.g022950.t1.2.v5.5	1.46175	0.499216	3.20449	2.65724	2.01445	1.64225	2.68798	2.7618
Cre01.g023000.t1.1.v5.5	1.45546	3.04025	1.38642	2.76211	2.37104	3.54129	3.36118	2.91439
Cre01.g023050.t1.2.v5.5	4.39942	14.8851	23.7936	8.56007	8.73762	23.5277	12.738	9.67562
Cre01.g023100.t1.1.v5.5	3.65851	4.84234	3.15992	4.97768	1.95031	5.73475	2.96339	2.29528
Cre01.g023150.t1.2.v5.5	5.19369	24.6298	71.9898	23.6147	3.84835	3.50339	3.98996	7.32798
Cre01.g023200.t1.2.v5.5	16.9399	18.4405	88.3208	20.8327	7.76511	15.8916	14.1096	11.5264
Cre01.g023250.t1.1.v5.5	0.212229	1.90887	0.890426	2.00056	0.264099	2.95379	1.8038	1.61264
Cre01.g023300.t1.2.v5.5	1.02695	0.452836	0.785874	1.88427	2.59788	2.88238	5.17957	5.35773
Cre01.g023350.t1.1.v5.5	9.06899	13.3142	11.3051	12.3707	5.56795	12.0262	15.7145	4.66823
Cre01.g023400.t1.1.v5.5	22.2353	33.2374	135.592	26.6152	15.5364	32.3549	22.2066	13.9828
Cre01.g023450.t1.2.v5.5	0.515434	0.0989443	0.5002	1.27081	0.779006	0.250809	0.500303	1.91308
Cre01.g023500.t1.2.v5.5	2.3666	1.65002	1.30556	1.96577	3.11499	1.8571	1.59842	2.06277
Cre01.g023550.t1.1.v5.5	3.6247	0.0899932	0.274566	1.1905	2.75104	0.346296	1.21649	1.45768
Cre01.g023650.t1.1.v5.5	0.00887922	0.114527	0	0.0202702	0.128863	0.0855656	0.0961612	0.123008
Cre01.g023750.t1.1.v5.5	0.359744	1.18746	1.13021	1.65656	0.557841	1.62981	1.92356	1.18663
Cre01.g023773.t1.2.v5.5	6.05984	10.803	2.06598	7.18357	4.17401	5.78491	6.0367	6.00636
Cre01.g023787.t1.1.v5.5	22.14	37.2112	7.9091	17.4955	13.1589	19.3192	13.0124	12.3843
Cre01.g023800.t1.1.v5.5	2.41069	1.92464	0.30624	2.99376	2.34497	1.98244	2.01831	2.84736
Cre01.g023850.t1.1.v5.5	3.40806	3.22598	1.55786	2.23619	4.55527	3.20339	3.32782	3.68435
Cre01.g023900.t1.1.v5.5	6.569	5.00566	38.0802	4.64947	8.69401	8.74088	8.47401	3.87573
Cre01.g023913.t1.2.v5.5	4.56954	4.61012	22.1445	4.03495	4.34257	7.01038	4.27009	2.79221
Cre01.g023950.t1.1.v5.5	3.23929	4.70629	18.1777	3.48603	2.07501	4.44297	2.73216	1.46122
Cre01.g024000.t1.1.v5.5	2.98554	2.57274	5.18436	2.61702	1.17282	3.48037	1.50757	1.25813
Cre01.g024050.t1.2.v5.5	24.8804	23.7583	103.878	4.20377	32.0088	21.0009	31.0587	3.8898
Cre01.g024100.t1.1.v5.5	7.73711	7.38428	0.715318	8.89923	2.87107	5.47405	2.726	3.88776
Cre01.g024150.t1.2.v5.5	37.0256	43.0581	9.87606	30.8298	22.8996	29.2914	19.2637	19.114
Cre01.g024200.t1.1.v5.5	5.39435	9.08869	0.629934	7.1195	3.6067	7.3465	2.99418	7.62827
Cre01.g024250.t1.1.v5.5	2.62813	0.886681	0.712155	2.67702	3.56268	1.82892	2.44299	3.57714
Cre01.g024251.t1.2.v5.5	2.20018	2.64542	0.268731	2.70997	0.791662	2.35099	1.75339	1.79833
Cre01.g024300.t1.2.v5.5	10.3601	17.3769	110.596	15.2613	8.94643	18.9471	17.4261	7.66616
Cre01.g024350.t1.2.v5.5	27.0347	52.0392	46.3214	35.7222	27.8691	70.075	39.984	42.1981
Cre01.g024400.t1.1.v5.5	2.49517	2.27113	3.10936	3.60319	1.45073	5.80995	4.55784	3.36899
Cre01.g024500.t1.1.v5.5	1.18337	0.0347567	0.880432	1.08412	0.549616	0.224983	0.545348	1.31185
Cre01.g024550.t1.1.v5.5	6.64643	8.02294	1.44636	3.80226	4.99804	3.76372	4.16794	5.39152
Cre01.g024601.t1.1.v5.5	0.636081	0.7856	2.26715	0.785739	1.2522	0.294747	0.633518	0.739958
Cre01.g024650.t1.1.v5.5	10.0285	6.36212	2.23711	4.61545	8.28832	5.35184	4.55098	5.04495
Cre01.g024750.t1.1.v5.5	0.155312	0.281313	0.00904749	0.439977	1.19105	1.40823	0.70319	1.97678
Cre01.g024800.t1.1.v5.5	0.251049	0.519686	0.129881	0.836099	0.19773	0.145842	0.169686	0.473623
Cre01.g024850.t1.1.v5.5	3.57783	10.8943	32.0407	10.7873	3.61279	5.48425	5.77843	4.67499
Cre01.g024900.t1.1.v5.5	4.47698	2.01147	0.876873	3.69733	3.77226	0.852079	3.42275	3.79285
Cre01.g024950.t1.2.v5.5	6.41064	5.77549	17.9502	7.708	3.84828	10.1811	8.88904	7.86045
Cre01.g025000.t1.2.v5.5	3.03898	4.2012	8.12559	4.83097	0.951582	3.71747	2.07903	2.99019
Cre01.g025025.t1.1.v5.5	5.13064	5.04109	15.7072	6.51013	4.75293	5.34232	6.02908	5.47554
Cre01.g025050.t1.2.v5.5	81.4417	23.3496	37.0873	21.3809	56.9334	21.4731	30.896	39.7811
Cre01.g025100.t1.1.v5.5	13.7077	6.11708	2.48345	6.56704	6.49485	6.83537	9.80159	7.68872
Cre01.g025150.t1.2.v5.5	0.744065	13.4625	9.15171	3.06411	1.40478	15.2685	11.8169	2.07465
Cre01.g025200.t1.2.v5.5	0.0495968	0.0891319	0.0603519	0.264022	0.18822	0.026022	0.247844	0.0970569
Cre01.g025250.t1.1.v5.5	13.8338	46.0603	7.07416	11.072	4.61724	17.4241	11.3963	6.01769
Cre01.g025300.t1.1.v5.5	2.75077	1.73709	2.25294	6.58838	1.92326	1.32001	2.95439	2.83854
Cre01.g025350.t1.2.v5.5	20.1812	14.0352	3.21652	15.727	20.2324	9.88815	11.9877	16.959
Cre01.g025400.t1.2.v5.5	14.5044	2.19482	1.58435	4.63533	16.4812	4.21816	4.87825	7.20872
Cre01.g025450.t1.2.v5.5	31.9548	3.4346	3.25413	5.84681	29.7807	8.44132	13.6629	10.611
Cre01.g025500.t1.1.v5.5	0.912154	5.26005	0.332417	1.68325	0.683307	2.39034	0.997204	2.43543
Cre01.g025551.t1.1.v5.5	2.13587	3.13225	0.415606	2.2755	1.65954	3.7336	2.94281	1.9431
Cre01.g025600.t1.2.v5.5	8.5309	1.27832	0.806915	1.98542	7.35301	2.866	1.949	2.77169
Cre01.g025700.t1.1.v5.5	2.968	0.870896	0.587035	2.38696	3.64721	1.49905	1.47058	2.42187
Cre01.g025767.t1.2.v5.5	0.962048	0.112562	1.05718	1.12315	0.495572	0.732998	0.809508	1.00565
Cre01.g025808.t1.1.v5.5	1.10984	1.58931	0.264556	1.56807	0.563193	1.68091	1.30225	1.26984
Cre01.g025850.t1.2.v5.5	16.2642	5.40379	23.5446	5.31551	21.1567	8.2768	15.2723	5.17819
Cre01.g025900.t1.2.v5.5	1.53809	3.74301	0.817009	1.89241	0.768908	2.9422	2.73327	2.27672
Cre01.g025950.t1.2.v5.5	0.00842785	0.0324847	0.112156	0.026911	0.0423022	0.0889045	0.0542706	0.0741099
Cre01.g025983.t1.1.v5.5	1.44964	3.08702	8.45715	1.8731	1.8868	3.44716	2.52833	1.67184
Cre01.g026016.t1.1.v5.5	38.4707	14.7101	57.7479	25.7151	34.4249	17.0054	21.1157	22.8943
Cre01.g026050.t1.1.v5.5	9.66997	4.933	12.0225	6.9247	4.77202	3.64001	3.45862	3.04855
Cre01.g026150.t1.1.v5.5	0.919872	1.14752	0.141412	1.27714	0.463288	1.07922	0.54405	0.904974
Cre01.g026200.t1.2.v5.5	4.27197	25.0951	4.59372	5.73574	1.13799	14.9828	7.03045	2.89228
Cre01.g026250.t1.2.v5.5	0.915414	2.96798	0.861158	3.48937	1.53611	4.52521	3.12904	4.42791
Cre01.g026300.t1.2.v5.5	3.27169	3.11592	0.630952	3.81475	3.13466	4.77452	2.42971	3.21355
Cre01.g026350.t1.1.v5.5	0.118723	0.0506838	0	0.108239	0.132723	0.106514	0.0871647	0.169255
Cre01.g026400.t1.1.v5.5	0.652278	0.870583	0.328865	1.44297	0.369065	0.316933	0.860782	1.02713
Cre01.g026450.t1.2.v5.5	48.366	61.6668	78.2438	55.2387	45.3891	41.8943	37.5733	40.8976
Cre01.g026500.t1.1.v5.5	2.58184	1.25747	5.09449	2.14301	1.92423	16.6657	8.2783	4.24183
Cre01.g026550.t1.1.v5.5	20.6372	62.9183	50.4526	25.9475	20.7466	33.6458	19.8147	23.0766
Cre01.g026600.t1.2.v5.5	113.78	146.215	158.774	110.361	99.6161	100.271	88.4342	85.7745
Cre01.g026650.t1.2.v5.5	5.7631	5.13333	3.04576	6.05892	3.11281	3.12052	5.55109	3.67011
Cre01.g026700.t1.1.v5.5	0.510504	1.70039	0.142347	1.4246	0.362945	0.583054	0.510714	0.861153
Cre01.g026750.t1.1.v5.5	0.0475565	0.026044	0.0607689	0.087168	0.13708	0.0511487	0.160406	0.479993
Cre01.g026800.t1.1.v5.5	0.458995	0.112239	0.177831	0.580885	0.309354	0.100257	0.374347	1.04908
Cre01.g026850.t1.1.v5.5	0.2809	0.152155	0.0979575	0.365265	0.216162	0.0765407	0.277178	0.683372
Cre01.g026950.t1.2.v5.5	3.02642	0.8653	0.716682	1.46241	4.1119	1.93464	1.71635	1.95629
Cre01.g027000.t1.2.v5.5	6260.22	7352.65	12481.2	2781.97	5699.82	1956.67	3773.44	2775.54
Cre01.g027050.t1.1.v5.5	40.0948	25.3619	46.0021	43.2468	29.9279	17.2998	23.8058	31.9159
Cre01.g027100.t1.2.v5.5	24.5533	33.0544	52.3697	27.2924	43.5808	18.9234	22.8795	28.625
Cre01.g027150.t1.1.v5.5	6.80166	4.87399	0.672542	4.64331	5.5386	3.55306	5.31071	3.50351
Cre01.g027200.t1.2.v5.5	67.812	73.5291	335.951	87.0946	90.0951	88.7501	95.3878	46.7579
Cre01.g027250.t1.2.v5.5	2.94011	1.37789	6.37749	3.68351	1.81748	1.87061	3.68168	2.80357
Cre01.g027300.t1.1.v5.5	0.290205	14.949	25.1493	3.4477	0.651861	1.77617	1.99632	2.97822
Cre01.g027400.t1.1.v5.5	0.433515	0.103237	0.433436	0.610604	0.17356	0.185252	0.170646	0.450464
Cre01.g027450.t1.2.v5.5	4.9916	6.91898	2.786	9.37336	7.54585	9.94756	10.9696	12.3309
Cre01.g027500.t1.1.v5.5	0.534327	3.73777	1.66689	2.94289	2.45165	5.484	8.22982	4.24957
Cre01.g027550.t1.1.v5.5	35.7474	9.52679	5.24713	14.5173	20.1613	10.3067	21.883	17.6869
Cre01.g027575.t1.1.v5.5	12.2928	3.39941	1.88249	3.36149	5.65019	3.89556	6.63038	1.9745
Cre01.g027600.t1.1.v5.5	1.25562	1.15791	0.121066	1.34752	1.25063	1.28416	1.37682	1.23636
Cre01.g027650.t1.2.v5.5	0.586901	0.406871	0.192804	0.52338	0.546791	0.388854	0.428975	0.61236
Cre01.g027700.t1.2.v5.5	1.92001	9.23451	1.74124	1.16136	1.07889	7.37255	3.46708	1.07318
Cre01.g027764.t1.2.v5.5	6.72798	15.2708	9.47166	7.44449	4.29316	11.2921	4.96267	4.84561
Cre01.g027800.t1.2.v5.5	46.0067	159.283	145.512	44.8916	31.7404	134.879	59.801	29.5989
Cre01.g027850.t1.1.v5.5	1.23192	8.1951	3.64939	3.48583	0.665194	9.87522	7.01431	3.08952
Cre01.g027900.t1.2.v5.5	1.18849	8.86366	1.81006	7.18652	0.870896	5.16007	3.6002	3.20739
Cre01.g027950.t1.2.v5.5	51.3219	3.27178	3.11855	7.0013	37.5676	6.5999	7.76165	11.274
Cre01.g028000.t1.1.v5.5	4.21227	0.293131	2.52738	0.68734	2.64143	0.683397	0.515267	1.51058
Cre01.g028101.t1.1.v5.5	12.8362	12.3602	149.844	14.2029	20.0708	6.42572	24.2218	7.47346
Cre01.g028150.t1.2.v5.5	13.9125	31.2502	96.5272	18.1847	11.5829	17.0864	15.7194	9.86372
Cre01.g028200.t1.1.v5.5	2.7948	1.33758	4.28162	3.70021	2.68801	1.10845	1.36474	3.38617
Cre01.g028250.t1.2.v5.5	10.2709	8.80579	33.897	17.3421	8.05759	4.14386	9.54689	8.54178
Cre01.g028300.t1.2.v5.5	32.2319	32.4705	188.163	24.0284	39.5342	37.5879	62.6133	15.6243
Cre01.g028350.t1.1.v5.5	1.19916	2.52404	3.40066	3.09882	1.21628	7.58381	7.94188	2.66086
Cre01.g028400.t1.1.v5.5	1.86375	1.28637	0.935501	2.27761	1.94316	2.79452	2.02901	3.12046
Cre01.g028423.t1.2.v5.5	1.14335	6.0583	1.0122	2.48022	0.431843	2.03289	1.54248	1.32429
Cre01.g028450.t1.2.v5.5	6.58509	14.2827	0.551616	8.52273	4.69056	7.36221	1.60201	5.52677
Cre01.g028500.t1.2.v5.5	6.85584	10.164	18.5014	10.8362	2.98507	12.2343	6.73807	5.10403
Cre01.g028550.t1.2.v5.5	6.43109	8.44123	2.55416	11.3751	3.08868	2.97345	4.38488	5.79421
Cre01.g028600.t1.2.v5.5	4.46323	82.9198	49.3584	6.18793	2.6064	45.8709	44.4783	4.00785
Cre01.g028650.t1.2.v5.5	11.2188	13.0074	43.5586	20.2819	21.0104	11.5129	13.8388	20.6882
Cre01.g028713.t1.1.v5.5	17.2368	25.7422	171.253	15.142	36.3363	34.1565	50.2399	25.2551
Cre01.g028777.t1.2.v5.5	11.5674	13.0129	74.0933	6.25814	3.75653	2.1878	5.87892	1.84144
Cre01.g028850.t1.2.v5.5	33.6534	7.33122	11.1624	3.29404	32.6016	21.9356	10.469	14.784
Cre01.g028900.t1.1.v5.5	3.37361	0.640021	1.09684	1.19761	4.16582	2.50518	6.05786	4.20201
Cre01.g028950.t1.2.v5.5	8.25132	3.96456	3.64785	5.26037	5.561	3.41232	4.2958	5.99206
Cre01.g029000.t1.2.v5.5	2.9192	22.3291	623.774	110.847	6.06214	2.98689	4.99842	5.82785
Cre01.g029050.t1.2.v5.5	19.4326	24.9748	66.7513	24.7846	29.9134	15.9068	27.1125	14.0259
Cre01.g029100.t1.2.v5.5	3.05131	1.05622	3.58934	5.50741	2.67487	3.18881	3.69941	6.75472
Cre01.g029150.t1.2.v5.5	8.41459	11.9849	31.7768	6.51197	10.0192	21.275	11.1497	5.71761
Cre01.g029200.t1.1.v5.5	0.572592	0.0160957	1.22821	0.780296	0.562502	0.575387	1.29899	1.47882
Cre01.g029250.t1.2.v5.5	12.2978	8.33645	54.3207	13.8048	24.4588	4.17652	22.315	2.57109
Cre01.g029300.t1.2.v5.5	123.183	221.534	22.3445	51.6551	134.096	123.071	67.354	79.7404
Cre01.g029350.t1.2.v5.5	9.16852	0.408431	1.27209	2.57751	11.2348	2.04139	2.60183	4.05327
Cre01.g029400.t1.2.v5.5	1.59244	0.707972	0.200032	0.895776	3.20191	1.52844	1.58935	1.35204
Cre01.g029450.t1.1.v5.5	10.4348	18.3384	7.26675	15.2795	9.44735	20.2257	11.627	12.1551
Cre01.g029500.t1.2.v5.5	4.94632	5.95739	8.17355	4.94313	4.86112	8.49118	6.55435	4.30609
Cre01.g029550.t1.1.v5.5	3.35265	1.24291	0.584284	3.18901	4.05277	1.03602	1.19839	2.95575
Cre01.g029600.t1.2.v5.5	2.12691	1.65736	4.89378	3.09273	3.24436	3.20379	2.40874	3.42076
Cre01.g029650.t1.1.v5.5	14.081	8.20526	20.4422	11.6637	11.3309	9.04708	10.0035	8.91547
Cre01.g029700.t1.2.v5.5	273.912	23.6509	124.099	42.6079	241.112	15.301	54.0354	24.3636
Cre01.g029750.t1.1.v5.5	12.7581	10.9567	5.4225	3.65118	18.8539	25.0785	12.8682	12.9384
Cre01.g029800.t1.2.v5.5	6.10169	1.37115	1.53009	2.07137	4.6012	2.87231	1.9373	2.05424
Cre01.g029850.t1.2.v5.5	13.8256	30.0607	153.111	14.5562	11.7499	31.6407	20.5569	10.1453
Cre01.g029900.t1.2.v5.5	3.70809	5.41175	9.45103	3.2423	3.51463	5.60438	3.75036	2.82531
Cre01.g029950.t1.2.v5.5	17.8311	398.101	170.824	32.7062	15.5915	104.769	29.5729	29.9879
Cre01.g030000.t1.1.v5.5	0.142391	0.524497	0.42549	0.0819547	0.302529	0.353899	0.254257	0.0520937
Cre01.g030050.t1.2.v5.5	444.692	581.013	421.73	243.578	269.081	344.002	358.407	180.544
Cre01.g030150.t1.2.v5.5	0.851827	1.63843	0.845408	3.31289	2.64507	3.4121	1.25379	3.92711
Cre01.g030200.t1.2.v5.5	101.034	28.9107	7.79379	16.2452	87.733	28.0796	18.8945	30.335
Cre01.g030250.t1.2.v5.5	5.94707	15.7003	3.79328	5.92759	4.39044	14.454	7.0893	4.66712
Cre01.g030350.t1.1.v5.5	0.205183	3.14376	8.98534	20.9569	2.17379	0.587166	0.691492	1.3258
Cre01.g030400.t1.1.v5.5	0.283719	0.426319	0.283297	0.982018	0.184622	0.525688	0.772088	1.07142
Cre01.g030450.t1.1.v5.5	3.02404	2.67475	2.11622	4.5765	4.19217	3.78076	5.67601	4.53312
Cre01.g030500.t1.2.v5.5	34.9826	19.8356	104.186	12.0565	47.3108	40.8709	39.8569	17.3014
Cre01.g030550.t1.2.v5.5	7.66819	20.924	112.275	14.7334	6.87198	15.2624	13.7206	8.61413
Cre01.g030600.t1.1.v5.5	5.77988	0.326902	0.184896	2.27367	9.60442	0.457133	0.484667	3.73056
Cre01.g030650.t1.2.v5.5	2.17493	4.8163	4.57882	1.7419	1.02457	7.01696	8.05436	2.43058
Cre01.g030700.t1.1.v5.5	5.93592	4.29225	4.88386	1.43908	5.32956	7.30952	8.67338	3.59934
Cre01.g030750.t1.1.v5.5	19.7408	1.18826	0.910517	2.68459	11.2825	0.865615	1.20659	3.08426
Cre01.g030800.t1.2.v5.5	10.9929	22.4061	47.4672	16.0183	11.4048	13.8804	18.3048	12.447
Cre01.g030850.t1.2.v5.5	13.0081	71.2911	344.993	40.5853	20.1887	42.8578	50.6157	21.4649
Cre01.g030900.t1.1.v5.5	0.222761	1.85698	1.0547	1.09873	0.899385	2.65974	1.93254	2.5615
Cre01.g030950.t1.1.v5.5	13.0322	8.86447	5.75803	14.6641	8.29705	5.67108	9.30686	12.0839
Cre01.g031004.t1.2.v5.5	33.6639	17.6096	13.0183	19.6804	39.2752	18.8655	16.88	27.6646
Cre01.g031100.t1.2.v5.5	149.428	262.42	144.348	59.9101	138.846	242.536	199.439	54.2786
Cre01.g031200.t1.2.v5.5	15.5445	20.2742	12.9264	14.6734	16.2157	17.7398	15.4261	14.6699
Cre01.g031250.t1.2.v5.5	9.76311	49.5667	43.6611	16.6074	16.6122	30.5033	16.0384	23.0552
Cre01.g031300.t1.1.v5.5	5.02462	4.64506	5.18503	2.49936	4.6302	10.1731	11.8531	2.35081
Cre01.g031350.t1.2.v5.5	0.0360525	0	0.0206399	0.104529	0.562641	0.0896801	0.145284	0.293934
Cre01.g031450.t1.2.v5.5	0.291707	0.0718193	0.077738	0.424249	0.949883	0.175218	0.228311	0.604228
Cre01.g031500.t1.2.v5.5	0.133091	0.654748	17.719	6.1985	0.487169	0.556414	6.06355	1.39578
Cre01.g031550.t1.1.v5.5	0.378247	1.59506	1.32624	1.32807	0.455349	1.23034	1.46499	0.771495
Cre01.g031600.t1.2.v5.5	18.7569	28.8544	133.099	23.1495	17.912	45.8763	40.3776	13.3333
Cre01.g031650.t1.1.v5.5	3.74168	81.3626	69.5362	2.25197	4.91317	12.2164	31.4868	2.94206
Cre01.g031750.t1.2.v5.5	14.4514	14.8201	0.687069	15.4201	6.76385	8.20142	1.51921	8.23692
Cre01.g031800.t1.1.v5.5	0.26895	1.23481	0.515435	1.0354	0.264803	1.751	1.01978	1.09601
Cre01.g031850.t1.1.v5.5	1.84819	3.77061	1.32995	2.62243	1.67837	2.14082	2.20386	2.18427
Cre01.g031900.t1.1.v5.5	1.32161	6.34499	8.71327	2.62473	2.17067	4.70668	1.64915	3.36627
Cre01.g031951.t1.1.v5.5	0.608517	0.180706	0.0594916	0.546261	0.592552	0.42638	0.400668	0.540427
Cre01.g032000.t1.1.v5.5	10.7802	13.4409	2.48326	13.36	4.22387	14.2011	8.64468	10.9647
Cre01.g032050.t1.2.v5.5	5.87765	19.9693	27.746	7.87346	4.90255	26.3582	8.32569	7.99109
Cre01.g032100.t1.1.v5.5	1.67156	2.18882	9.45719	3.53011	2.79962	1.71961	2.91582	2.27911
Cre01.g032139.t1.2.v5.5	0.956496	1.10789	3.62832	1.80098	0.500919	0.756339	0.829395	0.568551
Cre01.g032150.t1.1.v5.5	11.7953	1.6328	0.809063	2.95826	9.96952	3.44431	3.22042	3.68477
Cre01.g032200.t1.2.v5.5	0.260632	0.0190934	0	0.0833138	0.701282	0.13272	0.0926223	0.147079
Cre01.g032250.t1.1.v5.5	12.9135	12.2061	22.0654	12.7613	13.6243	9.20513	15.1933	9.51075
Cre01.g032300.t1.2.v5.5	1415.03	353.957	261.386	382.758	965.282	308.385	312.566	441.023
Cre01.g032350.t1.2.v5.5	2.05326	14.052	134.837	8.69366	2.18402	7.02335	10.3868	2.15125
Cre01.g032400.t1.2.v5.5	7.69283	13.7174	16.3412	7.22306	11.1532	8.88287	8.51175	7.6475
Cre01.g032450.t1.2.v5.5	1.54842	3.18778	0.701031	4.2087	1.94412	7.31015	3.74996	4.65675
Cre01.g032500.t1.2.v5.5	6.51287	17.704	18.2483	5.18632	6.33194	29.7328	13.7193	6.17907
Cre01.g032550.t1.1.v5.5	0.875759	0.0119336	0.686526	1.12979	0.434535	0.107282	0.655335	1.53568
Cre01.g032600.t1.1.v5.5	13.8403	67.1259	33.6674	32.4026	13.4041	94.9258	25.6881	30.5564
Cre01.g032700.t1.2.v5.5	12.4928	14.4756	4.31064	20.7937	17.2384	9.85488	12.6233	19.5183
Cre01.g032750.t1.2.v5.5	8.32914	86.6141	38.6863	17.4661	4.54718	55.4115	13.4315	10.3651
Cre01.g032800.t1.2.v5.5	2.28317	14.2662	7.96437	5.51565	3.92552	6.49438	5.62401	4.06786
Cre01.g032850.t1.1.v5.5	0.111202	0.0270752	0.00636724	0.113406	2.22587	0.0831958	0.149521	0.812313
Cre01.g032900.t1.1.v5.5	0.137868	0.0467441	0.1768	0.0308713	0.338959	0.0722505	0.173268	0.0435809
Cre01.g032900.t3.1.v5.5	0.0635398	0.0351676	0.193477	0.018476	0.077938	0.094342	0.0574444	0.0293423
Cre01.g032950.t1.2.v5.5	42.297	33.2483	160.256	25.2933	74.304	24.5161	73.0746	26.7779
Cre01.g033000.t1.2.v5.5	7.86889	2.13528	11.7789	3.54842	7.78438	5.12842	3.82279	2.88806
Cre01.g033050.t1.1.v5.5	3.0403	1.21803	0.851251	2.85454	1.84203	1.81854	4.15469	3.41139
Cre01.g033150.t1.2.v5.5	2.90127	24.7125	8.66965	6.24785	3.77068	15.6867	10.1293	6.31636
Cre01.g033200.t1.2.v5.5	0.430507	0.414041	0.218764	0.805312	1.07802	0.507497	1.58123	1.92038
Cre01.g033250.t1.2.v5.5	5.18731	6.26379	12.3777	4.40832	6.09229	10.8123	12.4845	6.21704
Cre01.g033350.t1.2.v5.5	4.10329	29.4483	14.1603	7.94162	5.6249	33.0606	12.2262	9.94291
Cre01.g033400.t1.2.v5.5	15.883	41.2807	18.0284	19.6889	20.0897	38.9687	22.4484	29.1053
Cre01.g033450.t1.2.v5.5	0.253262	0.0577208	0.0741465	0.535387	0.314372	0.0823951	0.533718	1.12027
Cre01.g033500.t1.2.v5.5	0.363478	0.101055	0.234192	1.19369	0.976187	0.245172	0.830595	2.06981
Cre01.g033516.t1.1.v5.5	0.455789	1.63556	0.48338	2.29698	0.780247	1.35216	2.23051	2.60786
Cre01.g033550.t1.2.v5.5	27.9568	23.2144	70.5777	35.2606	61.0953	91.6232	121.579	54.834
Cre01.g033700.t1.2.v5.5	1.3071	9.61271	57.7648	6.16308	1.9429	3.1653	2.53285	1.6289
Cre01.g033750.t1.1.v5.5	0.53863	0.523275	3.16022	1.10658	0.232469	0.446334	0.464888	0.705523
Cre01.g033763.t1.2.v5.5	2.45745	1.15005	1.23141	3.64012	1.59815	0.92986	0.975248	2.67039
Cre01.g033832.t1.1.v5.5	10.4218	18.607	1.0651	8.5682	3.82863	9.15264	3.74666	3.88609
Cre01.g033950.t1.1.v5.5	1.52653	3.09437	0.574016	1.89875	1.77019	1.82532	1.86842	2.42329
Cre01.g034000.t1.2.v5.5	18.6231	40.5429	44.5203	28.8148	22.6132	32.0628	18.1162	18.8871
Cre01.g034050.t1.2.v5.5	2.36719	50.5957	51.5121	15.5341	2.29455	29.4627	9.62426	6.11207
Cre01.g034150.t1.1.v5.5	5.20341	4.0441	2.69096	3.11069	9.64092	5.91557	9.14337	4.94737
Cre01.g034200.t1.1.v5.5	9.82996	2.09452	5.40992	3.50454	14.8039	2.41599	4.69212	5.65125
Cre01.g034250.t1.1.v5.5	6.72982	18.8306	0.340178	9.57346	0.993764	5.99905	0.748792	3.89284
Cre01.g034300.t1.2.v5.5	2.8864	3.29424	0.112554	2.40523	0.8417	1.51242	0.305676	1.46012
Cre01.g034325.t1.1.v5.5	0.55113	3.78577	21.0807	8.55051	1.57831	4.14668	5.6315	2.88317
Cre01.g034350.t1.1.v5.5	0.150252	0.782838	3.19645	1.8837	0.145024	0.935803	0.916836	0.313873
Cre01.g034380.t1.2.v5.5	6.28559	3.51009	1.29198	4.56847	3.63228	2.18966	3.70496	2.32281
Cre01.g034400.t1.1.v5.5	119.702	187.055	403.93	198.73	98.7568	61.8692	47.3631	64.3842
Cre01.g034451.t1.1.v5.5	12.7742	35.1378	130.888	23.6228	17.986	25.1034	24.1591	13.6957
Cre01.g034500.t1.2.v5.5	3.70895	0.330612	0.208757	0.813476	4.97147	0.741716	1.1856	1.58337
Cre01.g034550.t1.2.v5.5	29.2931	5.25085	5.25629	8.81894	31.7744	11.3252	11.443	13.9695
Cre01.g034600.t1.2.v5.5	1.46137	4.60588	27.2271	3.92202	1.6969	9.98229	9.41074	2.94669
Cre01.g034650.t1.2.v5.5	0.412211	0.684387	0.24275	0.877791	0.32823	0.616529	0.695732	0.707069
Cre01.g034700.t1.1.v5.5	4.89016	2.78992	15.6782	1.84943	5.21484	3.87031	1.7522	2.23884
Cre01.g034750.t1.1.v5.5	1.08022	1.05545	0.892659	1.76619	1.39675	2.31815	2.58168	2.94992
Cre01.g034800.t1.1.v5.5	18.5834	30.1989	17.2567	12.0486	29.4275	21.4982	16.4858	24.8018
Cre01.g034850.t1.1.v5.5	10.6025	0.226779	2.09201	1.8443	22.2449	2.40568	2.46995	7.08651
Cre01.g034900.t1.2.v5.5	1.22647	1.15507	0.113675	1.34949	1.45016	1.09262	0.51734	1.61688
Cre01.g034950.t1.2.v5.5	28.3361	108.702	346.259	71.8462	22.8147	41.9889	16.0381	27.3511
Cre01.g035000.t1.2.v5.5	19.9051	25.4286	0.868938	17.6397	9.07226	12.0067	4.67908	10.8233
Cre01.g035100.t1.2.v5.5	40.799	30.5884	54.2888	8.45245	54.0658	25.9148	57.5742	8.56073
Cre01.g035150.t1.1.v5.5	3.29813	4.09921	15.244	2.56775	2.21131	2.15388	2.06562	2.00412
Cre01.g035200.t1.2.v5.5	1.17879	3.61848	12.5608	2.22339	0.871315	1.22175	1.24317	0.885749
Cre01.g035250.t1.2.v5.5	1.24762	0.0163857	1.59358	1.05348	0.990496	0.17265	0.528286	1.3283
Cre01.g035350.t1.2.v5.5	19.8946	9.78511	73.9509	26.1384	14.5394	4.52205	13.6879	11.4189
Cre01.g035400.t1.1.v5.5	17.6744	25.3714	61.3977	8.59217	11.3154	36.3251	26.105	15.2187
Cre01.g035450.t1.2.v5.5	8.97292	29.2331	342.109	20.8222	19.4173	24.003	26.4772	12.4151
Cre01.g035500.t1.2.v5.5	1.45746	4.1554	30.4414	4.41871	1.9235	3.25306	4.23034	1.86583
Cre01.g035550.t1.1.v5.5	0.197605	0	0.534236	0.491871	0.36601	0.131227	0.524356	1.69386
Cre01.g035600.t1.1.v5.5	0	0	0.805926	0.0167017	0.0202716	0.127023	1.5535	0.0085808
Cre01.g035650.t1.2.v5.5	0.213169	1.25449	63.9528	3.50122	0.22237	3.68215	16.644	0.656717
Cre01.g035700.t1.2.v5.5	1.49328	0.765502	2.6073	2.12254	1.17963	0.685492	2.5532	1.37751
Cre01.g035750.t1.2.v5.5	8.56834	2.03416	2.25229	4.22882	11.6588	1.13234	5.83879	4.91854
Cre01.g035800.t1.2.v5.5	0.542745	2.55954	12.8647	2.45489	1.1916	4.20821	2.83795	1.84349
Cre01.g035850.t1.2.v5.5	5.01845	10.774	10.0124	4.85119	5.2634	13.3296	6.7423	4.63356
Cre01.g035900.t1.1.v5.5	0.065272	0.123618	0.376913	0.123299	0.22704	0.386082	0.23147	0.352473
Cre01.g035950.t1.1.v5.5	2.13592	6.55154	3.83295	4.01514	3.00937	3.58531	3.19645	3.68385
Cre01.g036000.t1.1.v5.5	4.41356	5.5522	45.208	4.00449	5.55377	37.2292	27.0655	3.13084
Cre01.g036050.t1.1.v5.5	1.1417	0.994221	2.03718	2.21124	0.485758	0.685417	1.45925	1.71836
Cre01.g036100.t1.1.v5.5	1.42365	0.00540717	2.37649	1.53896	1.67483	0.152163	0.817933	3.2075
Cre01.g036150.t1.2.v5.5	15.7014	5.28038	5.18618	3.19157	15.3022	8.2273	5.96733	6.21347
Cre01.g036200.t1.2.v5.5	12.7163	14.0325	18.8256	7.12814	14.1016	14.4211	14.6748	8.06219
Cre01.g036250.t1.2.v5.5	1.38372	5.2207	5.95765	1.39021	2.24514	16.8749	20.4332	1.81725
Cre01.g036300.t1.1.v5.5	1.72395	2.17377	2.96974	1.66213	1.67473	3.14559	1.85851	2.07707
Cre01.g036350.t1.1.v5.5	0.676176	1.39623	6.30247	1.39768	0.772534	5.99961	4.34263	1.16079
Cre01.g036400.t1.2.v5.5	18.0551	34.7797	27.7418	22.1456	20.6243	25.5725	21.449	26.0108
Cre01.g036451.t1.1.v5.5	2.07589	1.21881	3.27594	2.51619	0.983253	1.37218	1.51092	2.31534
Cre01.g036550.t1.2.v5.5	11.2222	19.0922	54.4976	14.493	15.6123	25.2194	17.3783	14.0623
Cre01.g036600.t1.2.v5.5	11.9914	10.1912	0.227132	13.0383	5.77125	6.52467	1.27187	10.4354
Cre01.g036650.t1.1.v5.5	1.79995	1.14706	3.93319	1.85841	3.38561	0.470476	4.52574	3.136
Cre01.g036700.t1.2.v5.5	12.5901	6.31888	2.61544	6.80471	10.7274	69.45	37.8082	6.59343
Cre01.g036750.t1.2.v5.5	8.39235	6.91305	2.33961	7.99441	8.20594	2.28624	5.04802	7.05244
Cre01.g036800.t1.1.v5.5	4.72348	2.50846	1.72103	3.6556	5.77368	2.41846	4.62596	3.14296
Cre01.g036850.t1.2.v5.5	38.6868	13.9818	7.74821	16.4761	27.8159	4.17459	5.42749	13.9339
Cre01.g036900.t1.1.v5.5	1.36388	0.963418	0.176154	1.49433	1.81747	1.57574	1.93474	2.45726
Cre01.g036950.t1.2.v5.5	1.01337	97.1256	2.11851	2.3781	4.20362	34.5091	25.3349	3.18377
Cre01.g037000.t1.1.v5.5	0	0.484355	0.0203596	0	0.0197952	0.127554	0.173384	0.0167583
Cre01.g037050.t1.2.v5.5	7.53467	12.132	2.53809	6.43638	9.55575	5.99878	9.19196	6.19436
Cre01.g037100.t1.1.v5.5	0.32302	0.2297	0.0602285	0.53707	0.948831	1.16706	0.822827	1.01669
Cre01.g037150.t1.1.v5.5	6.21397	14.1758	18.3478	4.88284	5.28464	13.0717	7.83527	5.25471
Cre01.g037200.t1.2.v5.5	11.2912	16.9763	11.0108	14.8532	9.89166	12.915	17.4375	16.6757
Cre01.g037250.t1.2.v5.5	94.7417	83.8023	310.023	51.273	112.077	95.2162	94.8036	58.7858
Cre01.g037350.t1.1.v5.5	3.21453	1.69641	0.662985	2.32851	1.64799	1.79114	2.91269	2.83266
Cre01.g037400.t1.1.v5.5	8.04163	9.11635	7.32136	6.61624	6.92721	7.77321	4.46641	5.49148
Cre01.g037450.t1.1.v5.5	0.0727873	0.0953199	0.0375092	0.221105	0.0448413	0.0637205	0.175268	0.11711
Cre01.g037550.t1.1.v5.5	1.36004	0	0.953813	1.26229	0.65692	0.0845305	0.375257	1.56276
Cre01.g037600.t1.1.v5.5	1.16398	0.101842	0.559931	0.0612277	1.64764	0.523197	0.21891	0.838626
Cre01.g037650.t1.2.v5.5	3.49213	7.17107	9.36732	4.81644	4.7293	7.71676	4.31315	5.07437
Cre01.g037700.t1.2.v5.5	43.2686	91.4877	34.4836	12.3395	13.8483	77.3866	47.8182	20.2108
Cre01.g037751.t1.1.v5.5	0.572692	0.549098	1.20966	0.878392	0.424283	0.90893	1.15726	1.61695
Cre01.g037800.t1.2.v5.5	10.8218	15.306	10.0542	12.4914	17.5329	12.7619	8.44804	10.7247
Cre01.g037850.t1.1.v5.5	186.059	112.563	84.5729	57.2448	166.568	91.0037	106.755	71.6073
Cre01.g037900.t1.1.v5.5	1.1364	5.20778	0.474513	2.77622	0.878269	3.46183	3.16834	2.26784
Cre01.g037950.t1.1.v5.5	2.06064	1.99203	1.44254	1.94268	0.856777	2.20184	2.14942	1.34679
Cre01.g038000.t1.1.v5.5	1.63416	1.20278	2.84817	2.93795	1.82571	1.47744	2.13665	2.02607
Cre01.g038050.t1.1.v5.5	10.1406	0.852093	0.201566	2.07029	6.59235	1.65078	2.88374	3.74696
Cre01.g038100.t1.2.v5.5	11.4817	49.8478	83.8381	13.6555	10.7247	141.261	116.849	14.8945
Cre01.g038151.t1.1.v5.5	0.79754	1.0227	0.487469	2.01554	1.71075	1.43446	1.68421	2.08001
Cre01.g038200.t1.2.v5.5	15.6134	14.1394	18.6147	9.93013	12.1348	14.666	15.8639	14.7259
Cre01.g038250.t1.2.v5.5	62.8546	266.553	697.012	74.2226	52.5578	163.149	98.5199	56.3204
Cre01.g038300.t1.2.v5.5	8.14464	8.69924	1.68216	10.7779	6.66892	5.88171	4.76439	9.44971
Cre01.g038350.t1.1.v5.5	1.35938	0.479933	0.818055	1.08868	2.5108	0.240741	0.521377	0.94002
Cre01.g038400.t1.2.v5.5	140.934	693.272	1213.94	197.405	239.734	1134.87	650.946	310.749
Cre01.g038450.t1.2.v5.5	0.0910023	0.0689878	0.826461	0.0629275	0.135296	0.269541	0.125346	0.147589
Cre01.g038500.t1.2.v5.5	0.977291	1.14377	3.54129	4.55574	0.455135	1.52314	1.5793	2.00903
Cre01.g038550.t1.1.v5.5	3.2578	5.51315	12.6142	5.87764	2.77972	2.99212	2.12716	3.96947
Cre01.g038600.t1.2.v5.5	214.97	480.961	245.771	82.2453	93.7252	285.296	125.386	71.8436
Cre01.g038650.t1.2.v5.5	53.6066	27.3676	8.42976	39.0597	39.2661	10.4553	13.4304	25.5965
Cre01.g038700.t1.2.v5.5	2.1121	4.70842	4.35704	3.52316	3.4951	6.91584	7.7492	4.8918
Cre01.g038750.t1.2.v5.5	14.5573	0.44095	0.759567	2.41518	11.7599	0.731278	2.34636	3.88557
Cre01.g038800.t1.2.v5.5	10.0206	6.82587	2.69933	7.3871	5.1011	6.34404	4.20034	9.00137
Cre01.g038850.t1.1.v5.5	18.6917	41.0299	23.8066	23.097	18.1263	45.5843	11.7409	19.4163
Cre01.g038900.t1.1.v5.5	0.886224	4.06138	3.38645	0.849617	0.873784	3.60302	2.4887	1.20632
Cre01.g038950.t1.2.v5.5	6.27801	23.1913	11.9775	8.63663	4.7379	12.1382	12.0057	7.9025
Cre01.g039050.t1.1.v5.5	0.275676	0.309036	0.125569	0.496161	0.632251	0.671581	0.668146	0.760065
Cre01.g039150.t1.2.v5.5	23.0044	48.7801	8.74216	31.4042	14.6704	29.4514	21.9693	20.0294
Cre01.g039200.t1.2.v5.5	77.1848	6.36722	11.8755	15.9008	36.2493	9.09943	11.7213	18.3039
Cre01.g039250.t2.1.v5.5	0.0636661	0.363143	0.167533	0.0390425	0.121899	0.34678	0.0529719	0.126079
Cre01.g039300.t1.2.v5.5	1004.44	749.72	1340.71	464.575	1173.42	522.05	799.656	371.02
Cre01.g039350.t1.2.v5.5	4.76156	26.6504	35.1247	11.3544	8.82828	35.8434	15.2766	11.907
Cre01.g039400.t1.1.v5.5	6.23567	14.0512	21.1717	6.88029	6.42788	21.3267	11.7777	8.88518
Cre01.g039450.t1.1.v5.5	10.1812	0.0729368	0.336382	0.162915	6.08043	0.149205	0.0433886	0.43351
Cre01.g039500.t1.2.v5.5	3.42731	0.0125627	0.0624276	0.272981	5.22138	0.385264	0.810966	1.28127
Cre01.g039550.t1.1.v5.5	0.588105	8.83726	7.46853	1.99065	0.841969	7.89785	3.63054	1.77511
Cre01.g039600.t1.1.v5.5	0.380685	1.03344	0.53213	1.08798	0.571948	1.72552	0.892424	1.04882
Cre01.g039626.t1.1.v5.5	0.256368	0.345708	0	0.506488	1.06312	1.7323	1.36625	2.24806
Cre01.g039702.t1.1.v5.5	3.71772	1.60907	4.13364	3.8157	5.47124	2.83269	4.2019	4.29991
Cre01.g039750.t1.2.v5.5	6.05078	10.0954	5.4071	6.12891	4.89794	8.6585	7.66958	5.05165
Cre01.g039800.t1.1.v5.5	5.94546	2.83749	4.88017	2.34562	5.16334	3.70315	4.36415	2.16275
Cre01.g039850.t1.1.v5.5	10.4505	0.866996	6.40122	2.93813	10.3903	0.62525	6.79637	2.46614
Cre01.g039900.t1.2.v5.5	3.70342	6.42968	50.0258	14.3643	2.0522	1.96633	1.85383	1.83578
Cre01.g039950.t1.2.v5.5	2.45452	4.1486	17.111	5.24856	1.74526	4.70452	3.52707	3.34456
Cre01.g040000.t1.2.v5.5	3887.83	4243.67	9793.42	1514.98	6209.03	2052.24	3920.41	2362.93
Cre01.g040050.t1.1.v5.5	1.2745	6.70797	23.8461	5.8338	1.44049	4.5371	3.2822	2.01243
Cre01.g040100.t1.2.v5.5	3.34446	19.1721	279.556	20.5325	2.78648	6.53089	7.83812	1.78846
Cre01.g040150.t1.2.v5.5	0.156272	0.335174	0.997865	0.700754	0.733267	0.72082	1.16304	0.712679
Cre01.g040200.t1.2.v5.5	30.1836	14.3283	18.6455	19.5354	25.6315	16.2646	17.0592	17.814
Cre01.g040250.t1.2.v5.5	9.76129	10.8756	13.1283	12.7822	10.223	13.0068	11.9507	12.2843
Cre01.g040300.t1.2.v5.5	4.04843	10.1343	1.35386	3.22501	1.59716	9.10705	8.13932	2.7692
Cre01.g040350.t1.1.v5.5	1.86465	7.92848	2.95299	2.05405	1.45042	8.12755	7.86872	1.79687
Cre01.g040379.t1.2.v5.5	1.18729	1.54633	0.108355	1.44358	0.530106	1.31441	1.19911	1.36654
Cre01.g040400.t1.2.v5.5	12.2896	14.971	8.74503	9.51061	9.36398	6.80726	11.4267	7.36182
Cre01.g040450.t1.2.v5.5	12.9198	17.9604	3.83749	11.5888	10.0122	11.2337	4.84683	19.9684
Cre01.g040476.t1.1.v5.5	1.92312	2.6679	21.6931	2.20975	1.68563	3.29936	3.25503	1.24044
Cre01.g040500.t1.2.v5.5	17.0666	39.4682	128.805	14.3036	18.1776	45.7835	27.363	14.5288
Cre01.g040550.t1.1.v5.5	2.66046	2.64215	9.62603	5.61211	1.83068	2.64999	3.06675	2.31181
Cre01.g040600.t1.1.v5.5	6.055	2.02597	5.60053	3.37072	6.74453	4.41251	4.50035	2.94778
Cre01.g040701.t1.1.v5.5	78.3619	52.5857	25.6593	40.5577	25.9673	31.5702	17.6289	29.3616
Cre01.g040750.t1.1.v5.5	70.8154	11.0054	21.5755	17.8181	11.4799	6.4379	3.66947	6.69165
Cre01.g040801.t1.1.v5.5	0.0653552	0.0143577	0.021056	0.0621306	0.509799	0.13272	0.0947736	0.383685
Cre01.g040900.t1.1.v5.5	13.6712	5.62816	23.6339	8.39445	23.8043	12.3452	20.5712	9.85612
Cre01.g040950.t1.2.v5.5	0.535838	0.253278	0.174763	0.183861	0.0345191	0.0657645	0.0205669	0.146009
Cre01.g041000.t1.1.v5.5	11.4549	14.6749	2.95079	12.5475	8.99366	21.1663	16.8286	13.5058
Cre01.g041050.t1.1.v5.5	0.0220139	1.07301	1.33661	0.393825	0.281006	7.41269	4.98577	1.11571
Cre01.g041050.t2.1.v5.5	0.233252	1.8525	2.07849	1.27905	0.873061	5.08516	3.91942	1.6762
Cre01.g041100.t1.1.v5.5	6.09433	10.9162	2.95139	6.71667	6.09443	11.6132	5.08032	6.1398
Cre01.g041150.t1.1.v5.5	7.57159	0.716817	0.773351	1.75164	3.19093	0.35173	1.06909	2.32501
Cre01.g041200.t1.1.v5.5	12.6585	4.401	31.7165	3.90121	21.5143	2.66691	8.50494	2.87926
Cre01.g041256.t1.2.v5.5	0.249454	0.46349	1.82499	0.543391	0.270939	0.369496	0.480142	0.196134
Cre01.g041256.t2.1.v5.5	0.0539417	0.174602	0.472764	0.249605	0.0577033	0.103577	0.102016	0.0630901
Cre01.g041300.t1.2.v5.5	3.12542	2.75869	1.20586	2.22053	1.84992	2.45883	2.41849	2.17368
Cre01.g041351.t1.1.v5.5	1.55348	6.23249	0.699345	3.41943	1.47395	6.0059	2.64472	3.58655
Cre01.g041400.t1.1.v5.5	6.4611	5.08834	1.29084	5.27919	5.83124	4.27959	5.1356	4.36375
Cre01.g041450.t1.1.v5.5	14.4851	5.62912	2.46644	7.72817	13.9067	7.88854	7.16502	9.4002
Cre01.g041500.t1.1.v5.5	1.81375	0.668055	1.58099	1.80778	2.40815	0.72473	1.75522	1.52949
Cre01.g041550.t1.1.v5.5	8.59811	2.87224	2.38763	3.18978	10.5126	2.09883	3.11017	3.08118
Cre01.g041752.t1.1.v5.5	0.196857	0.0975909	0.180526	0.126814	0.397216	0.115058	0.0230733	0.960482
Cre01.g041850.t1.1.v5.5	1.22123	4.07015	5.24134	4.12324	1.11899	3.05268	2.07	2.23914
Cre01.g041855.t1.2.v5.5	3.98608	2.48514	0.549039	4.59071	2.05968	1.14471	1.68031	1.88698
Cre01.g041900.t1.1.v5.5	0.327259	1.36274	6.11974	1.82771	0.810318	2.26452	1.93731	1.31171
Cre01.g041950.t1.2.v5.5	2.4683	14.3304	109.35	11.8036	3.05972	13.0855	9.13804	3.4642
Cre01.g042000.t1.2.v5.5	0.792214	0.0115548	0.392833	0.871819	1.02034	0.108002	1.63887	1.23496
Cre01.g042050.t1.2.v5.5	3.71373	19.4542	24.267	6.48803	3.51677	9.24644	25.177	3.07133
Cre01.g042100.t1.2.v5.5	0.0516558	0.0144906	0.0226993	0.00701067	0.193443	0.0109254	0.0119312	0.0113197
Cre01.g042150.t1.1.v5.5	3.02208	6.3785	1.22478	3.71313	2.5969	3.70662	2.38818	3.77704
Cre01.g042200.t1.1.v5.5	285.386	85.2707	1141.02	59.5827	513.713	395.368	876.143	127.754
Cre01.g042250.t1.1.v5.5	0.682831	0.261707	0.222636	0.385684	0.757874	1.29283	2.10314	1.01602
Cre01.g042300.t1.1.v5.5	5.54161	2.51727	8.29057	2.91236	5.69038	11.5206	5.88801	5.76798
Cre01.g042352.t1.1.v5.5	0.630295	0.0972859	0.163179	0.570005	2.28815	0.682783	0.751436	1.26753
Cre01.g042450.t1.1.v5.5	1.52942	1.77973	0.154502	2.80499	7.97601	4.9237	3.05126	7.60397
Cre01.g042502.t1.1.v5.5	0.0201925	0.0278939	0.0102745	0.0183361	0.0675274	0.0424525	0.0205866	0.02392
Cre01.g042550.t1.1.v5.5	10.1112	22.6027	6.53389	13.7352	8.6632	24.7279	13.4972	16.7928
Cre01.g042700.t1.2.v5.5	0.10569	0.198856	0.487818	0.0910959	3.41201	0.242087	2.99865	1.03582
Cre01.g042750.t1.2.v5.5	333.58	221.04	77.3154	314.059	586.006	243.001	174.958	535.875
Cre01.g042800.t1.2.v5.5	36.7163	62.659	43.9911	20.9108	28.3882	66.3885	62.6681	29.6661
Cre01.g042850.t1.2.v5.5	5.72047	14.4128	1.05606	8.5764	7.07917	11.1311	6.44043	7.60325
Cre01.g042900.t1.2.v5.5	13.332	15.8705	0.903131	9.30742	8.07657	11.0827	3.01618	6.89541
Cre01.g042950.t1.2.v5.5	9.55802	30.1929	16.8989	10.7088	11.5597	16.7794	14.0119	11.9578
Cre01.g043000.t1.1.v5.5	12.9607	3.24099	1.19782	6.67884	7.249	3.12084	5.50997	5.14484
Cre01.g043050.t1.2.v5.5	27.7437	23.6753	173.774	12.61	17.699	22.2542	27.9411	7.55141
Cre01.g043100.t1.2.v5.5	10.0963	12.8045	17.416	15.9343	7.9037	7.6675	6.51642	9.87253
Cre01.g043150.t1.2.v5.5	34.4767	14.2201	35.3762	21.0759	38.9608	6.19175	14.177	24.3483
Cre01.g043200.t1.2.v5.5	92.3698	35.0068	83.7965	41.3459	75.6551	24.264	61.9615	53.2469
Cre01.g043250.t1.1.v5.5	7.5582	1.94423	5.4252	4.09717	0.326207	0.622149	1.20556	1.20459
Cre01.g043300.t1.2.v5.5	2.09484	4.98897	5.23638	6.07116	3.67147	1.81891	5.8385	5.32671
Cre01.g043350.t1.2.v5.5	133.72	22.9433	40.3399	30.1894	70.0902	32.6589	30.291	55.5345
Cre01.g043400.t1.2.v5.5	2.1556	8.6948	16.8725	4.28497	2.27979	13.5398	7.84889	3.19365
Cre01.g043450.t1.2.v5.5	22.445	38.9494	23.2674	15.4468	14.3137	36.3251	34.4498	15.0413
Cre01.g043500.t1.1.v5.5	6.34664	8.06719	10.2841	8.24954	2.49075	3.67379	2.63515	3.90687
Cre01.g043550.t1.1.v5.5	1.08868	0.206184	0.0450472	0.938428	1.96553	0.297598	0.320483	1.21443
Cre01.g043600.t1.1.v5.5	3.8365	3.52082	1.8473	3.96507	2.87805	2.31122	2.62876	2.97111
Cre01.g043650.t1.1.v5.5	5.7694	0.895721	0.394685	1.3687	4.28432	1.44882	2.27445	1.7146
Cre01.g043700.t1.2.v5.5	0.670351	1.90241	0.382922	1.24836	0.611993	1.48066	0.918549	1.44677
Cre01.g043750.t1.1.v5.5	8.79331	3.19099	0.939968	5.3328	4.91488	4.19112	3.14013	4.45364
Cre01.g043800.t1.1.v5.5	0.947575	0.500232	0.0968497	0.329331	2.03127	1.05206	1.35409	1.22186
Cre01.g043850.t1.1.v5.5	3.93712	3.8531	16.3865	5.4618	4.71215	4.75861	4.47586	3.32046
Cre01.g044000.t1.1.v5.5	37.1861	34.5936	68.9516	40.643	17.0541	26.2161	22.5	21.8384
Cre01.g044050.t1.2.v5.5	91.6089	209.361	242.772	78.2143	42.3659	114.015	90.2891	42.9808
Cre01.g044100.t1.2.v5.5	46.9139	20.4549	31.7062	19.3023	39.8662	21.0836	22.1901	17.5194
Cre01.g044150.t1.1.v5.5	1.91815	0.932054	0.255357	2.05641	1.01498	0.270415	1.22737	1.61552
Cre01.g044200.t1.2.v5.5	2.62707	2.1741	0.684544	2.60582	1.49988	1.61833	1.71901	1.97536
Cre01.g044250.t1.1.v5.5	2.15587	1.09537	0.639389	0.830941	1.72581	1.54199	1.15275	0.756868
Cre01.g044300.t1.2.v5.5	0.00991741	0.106401	0.0349024	0.00786706	0.342974	0.109883	0.0493175	0.352517
Cre01.g044350.t1.1.v5.5	6.13249	1.35181	2.61022	1.57642	2.80031	1.96148	1.66533	2.01676
Cre01.g044400.t1.2.v5.5	20.0534	13.5894	1.25527	10.9135	14.4553	5.62401	5.54184	8.99428
Cre01.g044450.t1.1.v5.5	1.42483	1.38061	0.0213442	1.42291	0.832841	0.756134	0.373539	1.3518
Cre01.g044550.t1.2.v5.5	3.84121	8.3443	3.22445	12.317	5.42918	6.99448	8.21817	8.83968
Cre01.g044600.t1.2.v5.5	11.28	7.75118	4.8131	13.0526	12.9864	5.50928	8.40397	12.1315
Cre01.g044650.t1.2.v5.5	14.8037	4.64552	1.48846	9.54884	7.22581	2.9796	4.55602	6.61532
Cre01.g044700.t1.2.v5.5	1.0495	28.1584	7.3502	4.94138	0.450434	23.2485	9.61415	2.7938
Cre01.g044750.t1.1.v5.5	1.78426	6.49403	0.812125	2.76011	1.38228	6.05766	3.75427	3.87119
Cre01.g044800.t1.2.v5.5	1905.82	141.413	112.578	76.6919	1292.96	84.934	202.014	141.052
Cre01.g044850.t1.2.v5.5	1.00658	1.03918	11.3909	3.22983	2.44031	1.57342	5.80198	1.71609
Cre01.g045000.t1.2.v5.5	0.448165	0.232795	0.0255524	0.35704	0.694837	0.631523	0.30734	0.675944
Cre01.g045100.t1.2.v5.5	15.3762	15.613	5.79185	13.14	19.0233	23.7305	18.5641	15.8843
Cre01.g045150.t1.2.v5.5	2.17283	0.271316	0.460104	3.17259	0.976769	0.627719	1.00962	2.42271
Cre01.g045200.t1.1.v5.5	0.154882	0.0283329	0	0.0166424	10.408	0.078012	0.45794	1.88588
Cre01.g045350.t1.2.v5.5	19.6054	1.40404	0.751863	3.87611	20.2543	5.95701	5.19224	8.18528
Cre01.g045400.t3.1.v5.5	0.0807357	0.245919	0.860823	0.480277	0.0562292	0.268143	0.345622	0.318095
Cre01.g045450.t1.2.v5.5	7.11137	6.82723	4.4424	7.35514	12.4929	4.43997	6.4484	5.96838
Cre01.g045500.t1.2.v5.5	4.17347	1.56478	3.35003	2.48064	4.63135	2.20239	2.55059	2.39288
Cre01.g045550.t1.2.v5.5	238.011	85.0499	55.7927	141.473	207.869	47.1006	82.3082	127.465
Cre01.g045600.t1.1.v5.5	1.41784	9.49059	217.91	9.03414	2.74735	3.39037	6.14576	2.71076
Cre01.g045601.t1.2.v5.5	1.18381	1.30837	0.438301	1.64576	1.66597	3.316	1.41759	2.62212
Cre01.g045640.t1.2.v5.5	3.5507	3.36831	3.81797	3.14959	3.18787	4.06549	4.88837	2.68576
Cre01.g045650.t1.2.v5.5	32.8857	29.1009	218.088	14.6476	46.3751	30.4601	52.3057	11.7888
Cre01.g045700.t1.1.v5.5	6.49924	0.247024	0.712549	4.50469	3.91262	0.298785	1.79467	5.10162
Cre01.g045800.t1.1.v5.5	5.182	4.68713	0.685953	4.61289	4.9003	3.48095	3.69565	5.41422
Cre01.g045825.t1.1.v5.5	1.40852	4.08062	1.05652	1.78558	0.410768	2.60359	1.54427	1.83887
Cre01.g045850.t1.1.v5.5	0.228493	0.468273	0.0957074	0.325694	0.169185	0.504595	0.31852	0.423213
Cre01.g045902.t1.1.v5.5	6.61172	15.2217	1.39596	5.90124	5.85406	10.5286	6.4454	8.63937
Cre01.g045903.t1.1.v5.5	1.50255	4.56784	3.56769	2.71724	3.15134	3.33579	3.58164	1.9896
Cre01.g045950.t1.1.v5.5	8.26622	1.49313	4.83905	3.47524	18.7643	1.03836	4.61678	4.25794
Cre01.g046052.t1.1.v5.5	3.34755	1.12546	0.700789	1.26685	4.79898	1.98725	2.28524	2.09892
Cre01.g046150.t1.1.v5.5	4.3093	5.86498	4.11374	4.12827	3.5201	3.71563	5.13568	2.85989
Cre01.g046250.t1.2.v5.5	1.71016	0.323813	0.6428	0.891372	3.70477	0.626284	1.30878	1.22722
Cre01.g046324.t1.1.v5.5	1.17779	0.304233	0.611889	0.840469	1.77404	0.4368	0.548538	0.679403
Cre01.g046600.t1.1.v5.5	0.434473	0.533648	0.221253	0.889668	1.24532	0.475458	0.484937	1.31826
Cre01.g046650.t1.2.v5.5	1.06407	0	0.587842	0.676908	1.55528	0.444913	0.260857	0.921414
Cre01.g046652.t1.1.v5.5	6.26148	4.24552	5.71967	8.22556	12.6254	18.9625	16.4042	18.3872
Cre01.g046800.t1.1.v5.5	101.404	44.933	529.604	83.5335	108.676	27.7752	74.4913	37.1298
Cre01.g046850.t1.2.v5.5	11.5522	16.9099	38.4764	6.5546	12.4198	9.16818	7.33337	4.75141
Cre01.g047001.t1.1.v5.5	18.517	5.28002	19.9578	9.18714	5.34441	3.47005	3.69051	5.53165
Cre01.g047229.t1.2.v5.5	2.96441	5.23858	8.79605	4.11129	3.27342	7.96829	5.79089	3.3997
Cre01.g047265.t1.1.v5.5	36.9683	12.7223	8.41295	31.2775	41.8054	23.4509	11.2027	15.5552
Cre01.g047300.t1.2.v5.5	1.94697	0.044776	1.86365	3.25381	1.23558	0.807032	1.75703	3.5757
Cre01.g047350.t1.1.v5.5	0.353118	0.117878	0.175454	0.977229	0.691869	0.544322	1.11725	1.31743
Cre01.g047400.t1.1.v5.5	0.424599	0.0875597	0.341976	1.21318	0.560907	0.277316	0.601003	0.834664
Cre01.g047450.t1.1.v5.5	3.01413	2.22987	0.82281	4.29586	2.09767	1.99363	2.23349	2.85376
Cre01.g047500.t1.2.v5.5	1.50849	0.048369	0.165658	2.04495	1.04661	0.213325	0.696284	1.98833
Cre01.g047550.t1.2.v5.5	13.883	48.3934	26.25	18.256	15.9189	41.8271	16.0979	19.4573
Cre01.g047600.t1.2.v5.5	4.48764	6.86032	2.10274	5.44662	2.59205	1.77552	2.06883	2.3067
Cre01.g047650.t1.2.v5.5	0.74862	0.539394	0.598768	0.938758	0.499483	0.280531	0.349583	0.447725
Cre01.g047700.t1.2.v5.5	10.4902	31.2189	69.7982	26.0515	14.179	30.8504	34.8254	29.2667
Cre01.g047750.t1.2.v5.5	4497.29	4794.14	10523.3	2424.81	6430.26	2370.23	4040.89	2623.39
Cre01.g047800.t1.1.v5.5	40.3827	20.724	12.7522	20.2872	21.9666	21.4797	16.4739	22.247
Cre01.g047850.t1.2.v5.5	2.00562	1.2729	0	1.26352	1.27351	1.30449	1.867	2.44728
Cre01.g047900.t1.1.v5.5	22.2244	7.07783	6.99259	12.6404	7.60593	9.60369	6.64056	12.0817
Cre01.g047950.t1.1.v5.5	78.7047	5.26948	12.4214	16.637	39.538	5.14445	7.38134	15.9195
Cre01.g048000.t1.1.v5.5	2.49589	0.0178957	0.972143	1.92208	0.66521	0.0585774	0.467035	1.35206
Cre01.g048050.t1.2.v5.5	4.54269	7.36559	6.23912	5.79018	3.37659	4.29009	2.86757	3.53165
Cre01.g048100.t1.1.v5.5	2.0642	1.26157	0.836723	2.54587	1.48551	1.51607	1.70786	2.40421
Cre01.g048102.t1.2.v5.5	0.369662	1.09675	0.12781	0.674994	0.159355	0.735417	0.294825	0.16707
Cre01.g048150.t1.2.v5.5	24.0293	158.861	311.178	15.4849	51.5436	586.576	921.393	55.3775
Cre01.g048200.t1.1.v5.5	0.32751	0	0.208978	0.445982	0.36633	0.0645722	0.370316	0.826235
Cre01.g048250.t1.2.v5.5	6.07385	0.426266	2.8406	3.41132	2.63981	0.852322	1.76213	4.04517
Cre01.g048300.t1.1.v5.5	0.895461	1.29503	0.484239	1.30766	0.931108	1.53805	1.17803	1.55878
Cre01.g048350.t1.2.v5.5	0	0.0539952	3.98287	0.756116	0.0153169	0.189012	0.299339	0.0455438
Cre01.g048400.t1.1.v5.5	4.74667	1.41665	18.2379	12.8402	1.66469	1.20175	1.56309	4.62425
Cre01.g048450.t1.1.v5.5	1.88346	11.6307	15.3098	6.32357	1.18612	9.60803	9.66115	3.91119
Cre01.g048501.t1.1.v5.5	1.50519	1.18047	0.942278	2.90445	1.65779	1.2367	2.51643	3.11486
Cre01.g048550.t1.1.v5.5	1.33612	15.6855	11.5728	2.47544	1.5673	12.145	6.29584	3.02088
Cre01.g048600.t1.1.v5.5	2.91963	3.11643	11.9907	2.08004	3.02732	3.01108	3.63626	2.64828
Cre01.g048650.t1.1.v5.5	48.9382	24.6913	119.532	20.199	41.8757	37.1477	54.6486	34.3573
Cre01.g048750.t1.2.v5.5	20.7105	26.3307	26.2979	27.7837	10.7363	14.9466	6.663	14.5017
Cre01.g048800.t1.1.v5.5	6.79252	11.8243	12.6453	8.03754	6.11716	8.04821	8.67757	7.48978
Cre01.g048850.t1.2.v5.5	12.445	6.27016	20.7492	8.99626	15.5723	13.5748	9.8017	12.4868
Cre01.g048900.t1.1.v5.5	1.48046	2.48905	0.131767	1.93856	1.28513	2.34157	1.61661	1.8558
Cre01.g048950.t1.2.v5.5	53.4408	78.2027	12.283	32.4257	17.1993	30.5692	18.3687	22.3795
Cre01.g049000.t1.2.v5.5	88.2569	66.8936	38.5593	43.1682	42.4933	46.2464	47.5508	46.5246
Cre01.g049050.t1.2.v5.5	12.1462	11.9643	3.90559	11.271	8.41015	10.3161	9.25287	10.3322
Cre01.g049100.t1.1.v5.5	1.7617	1.54662	1.88985	1.72751	1.70555	1.77275	2.29441	2.07138
Cre01.g049200.t1.1.v5.5	0.246953	1.1739	0.235054	0.887337	1.70862	2.50776	2.02466	1.26785
Cre01.g049300.t1.1.v5.5	4.14234	0.469105	0.149229	1.03019	4.83057	0.680507	0.739077	1.31483
Cre01.g049350.t1.1.v5.5	4.71309	8.49472	3.91572	6.66599	4.23753	6.12079	9.15208	6.58218
Cre01.g049400.t1.2.v5.5	9.87807	5.24214	1.13947	7.87417	7.25354	2.46902	2.79695	5.95668
Cre01.g049450.t1.2.v5.5	7.45945	20.0838	36.7239	15.1632	10.6113	21.7421	13.5105	14.0581
Cre01.g049500.t1.2.v5.5	531.751	120.182	189.312	139.746	549.283	95.6967	199.765	262.21
Cre01.g049550.t1.2.v5.5	10.4273	11.9554	5.3763	9.6926	5.83839	14.0263	7.32846	7.55265
Cre01.g049600.t1.2.v5.5	36.1795	23.6924	16.1189	23.2247	21.6091	19.4391	18.6703	18.7397
Cre01.g049650.t1.1.v5.5	3.77031	6.78228	12.2872	4.50524	3.78268	8.65419	5.24694	3.50508
Cre01.g049750.t1.2.v5.5	7.66312	16.0832	12.4114	11.7636	6.20666	20.4367	9.60521	7.91296
Cre01.g049826.t1.1.v5.5	5.64315	9.51127	2.93213	1.10166	107.989	46.6568	34.9179	13.4262
Cre01.g049900.t1.1.v5.5	27.7323	30.3561	23.2535	19.8866	18.1614	28.9906	15.7406	17.0775
Cre01.g049950.t1.1.v5.5	233.5	27.4228	35.3856	35.1993	50.4123	1.98182	11.014	40.1379
Cre01.g050000.t1.2.v5.5	22.529	15.2629	7.57286	14.0932	18.7676	16.1573	21.7781	23.9527
Cre01.g050050.t1.2.v5.5	9.14391	13.3904	0.925105	9.36951	3.95318	7.84302	3.22856	5.77788
Cre01.g050100.t1.2.v5.5	129.568	210.567	282.127	105.729	110.147	126.984	129.083	63.5464
Cre01.g050150.t1.1.v5.5	1.85167	4.62031	10.3732	3.83745	1.93601	2.25037	6.45906	4.27342
Cre01.g050300.t1.1.v5.5	5.62919	3.63366	1.5328	8.65465	6.29956	7.40203	4.87588	8.13393
Cre01.g050350.t1.1.v5.5	2.61427	2.10113	0.329438	2.05163	1.43893	1.96854	2.9605	2.2423
Cre01.g050451.t1.1.v5.5	1.15441	1.30113	0.224583	1.73991	1.37942	1.5467	2.15841	2.12971
Cre01.g050500.t1.1.v5.5	9.86599	10.6475	5.39981	4.5761	6.08112	15.503	6.27924	5.90448
Cre01.g050550.t1.2.v5.5	242.075	183.251	151.408	101.553	202.747	46.7103	160.277	116.868
Cre01.g050600.t1.1.v5.5	5.45162	9.06055	1.30056	5.28803	3.3478	8.01272	3.94605	4.8372
Cre01.g050650.t1.2.v5.5	6.95875	0.556192	0.620546	1.32954	5.96681	1.27777	1.80343	2.44465
Cre01.g050750.t1.1.v5.5	0.656131	0.12508	2.2015	0.847929	0.607465	0.229667	0.533898	1.68922
Cre01.g050800.t1.1.v5.5	0.507375	0.00855534	0.289926	0.442671	0.420169	0.0879774	0.489818	1.02137
Cre01.g050900.t1.1.v5.5	2.88485	2.67314	0.65963	2.76992	1.89872	3.6194	5.31644	2.71934
Cre01.g050950.t1.2.v5.5	81.5763	65.0812	75.7737	48.7072	71.585	129.287	124.442	161.47
Cre01.g051000.t1.1.v5.5	9.37783	21.6846	1.4205	10.5647	2.73762	11.1188	5.53849	6.65307
Cre01.g051050.t1.2.v5.5	13.226	0.961238	0.491962	1.11151	12.8081	2.5525	1.62795	3.68777
Cre01.g051100.t1.2.v5.5	15.3242	13.3755	7.35703	13.2122	10.7716	14.4447	7.92413	8.88311
Cre01.g051174.t1.1.v5.5	0.323326	0.170261	0.0518231	0.215271	0.905007	0.751767	0.300303	0.703016
Cre01.g051211.t1.1.v5.5	0.0429389	0.0305264	0	0.0204101	0.159426	0.0871982	0.0346551	0.0626281
Cre01.g051250.t1.2.v5.5	32.5364	2.52794	1.19655	5.67054	49.7912	10.1106	11.0036	19.5379
Cre01.g051300.t1.1.v5.5	1.81186	1.0152	0.213413	1.78608	4.90309	2.47855	2.19596	4.32094
Cre01.g051350.t1.1.v5.5	3.78395	1.94211	2.19442	3.94962	2.78941	1.45268	3.96547	2.76738
Cre01.g051500.t1.2.v5.5	913.605	55.8648	218.069	131.585	1707.71	113.652	123.715	308.171
Cre01.g051550.t1.1.v5.5	2.17771	2.44038	0.746852	3.19297	2.93425	1.18136	1.84672	2.75321
Cre01.g051625.t1.1.v5.5	2.88303	1.50935	6.65827	5.60329	0.91249	1.56031	3.45907	2.7404
Cre01.g051700.t1.1.v5.5	0.197366	0.0752853	0.103597	0.15795	0.0829981	0.124224	0.0833743	0.0702064
Cre01.g051750.t2.1.v5.5	0.080505	0.0110505	0.00810296	0.0119548	0.124507	0.00745216	0.0284554	0.0772105
Cre01.g051800.t1.1.v5.5	2.98627	0.710621	0.458642	2.9587	2.38356	0.407137	4.98001	3.61346
Cre01.g051850.t1.1.v5.5	0.168324	0	0.0520608	0.504858	0.244412	0.0432211	0.207311	0.852249
Cre01.g051875.t1.1.v5.5	2.18092	1.56901	0.13254	2.84379	0.207036	0.534552	0.33087	1.29598
Cre01.g051900.t1.2.v5.5	173.969	120.275	80.923	103.421	221.98	109.557	106.474	126.286
Cre01.g051950.t1.2.v5.5	4.53984	20.3204	20.9327	10.5723	8.19503	64.7378	28.6344	12.0004
Cre01.g052000.t1.2.v5.5	15.0336	23.5327	96.6706	12.7177	18.0884	33.2638	35.0572	12.2734
Cre01.g052050.t1.2.v5.5	3.13599	43.4939	22.3069	8.2757	3.15238	25.942	9.21883	6.13275
Cre01.g052100.t1.2.v5.5	411.059	468.748	311.282	166.171	240.685	431.356	395.827	171.283
Cre01.g052150.t1.1.v5.5	4.5066	0.84743	1.35261	0.755308	4.04926	1.40934	0.83156	1.20672
Cre01.g052200.t1.2.v5.5	14.8535	13.5031	1.38004	17.1529	5.35531	8.62551	2.06628	10.5795
Cre01.g052250.t1.2.v5.5	47.1697	77.6118	14.4135	21.8539	58.8166	81.6394	46.592	32.4616
Cre01.g052300.t1.1.v5.5	2.18315	7.92081	2.88425	6.20705	4.1582	7.61673	4.12665	7.1162
Cre01.g052350.t1.1.v5.5	11.6585	21.852	10.5122	10.5817	10.2314	18.0294	12.1226	11.0127
Cre01.g052400.t1.2.v5.5	7.34601	30.0758	17.3686	8.16161	4.41964	24.0466	15.1056	6.04093
Cre01.g052450.t1.1.v5.5	5.72373	5.15448	5.62437	5.32463	4.20908	6.54015	6.17912	5.24446
Cre01.g052500.t1.1.v5.5	1.04528	1.86077	1.91772	2.66149	1.31446	2.32702	2.83828	1.9531
Cre01.g052550.t1.1.v5.5	5.79217	6.46254	30.3555	4.9637	5.83757	9.05596	10.2407	3.52908
Cre01.g052601.t1.1.v5.5	3.24547	3.90842	0.271851	3.17757	1.60421	3.1318	2.09218	1.53739
Cre01.g052650.t1.1.v5.5	0.638353	0.0691427	0.00574419	0.212598	1.54167	0.120616	0.336211	0.876534
Cre01.g052750.t1.1.v5.5	1.46199	0.142149	0.436581	1.29482	2.35284	1.10212	0.995113	2.08693
Cre01.g052850.t1.1.v5.5	0.0303626	0.0330561	0.0539737	0.108163	0.0798174	0.325279	0.142316	0.234077
Cre01.g052950.t1.1.v5.5	0.285666	0.0755019	0.139052	0.787194	0.480368	0.329275	0.584582	1.14244
Cre01.g053000.t1.2.v5.5	0.4198	107.717	384.054	38.0534	3.16702	97.0924	28.3482	19.7309
Cre01.g053100.t1.1.v5.5	1.44099	0.673002	0.308681	1.32852	0.875956	0.627018	0.717955	1.10637
Cre01.g053150.t1.2.v5.5	0.0245934	0	0.0511772	0.0154779	0.0833196	0.00662185	0.0143294	0.191635
Cre01.g053200.t1.1.v5.5	0.424576	0.593418	0.112322	0.905707	0.472797	0.171929	0.385726	0.765509
Cre01.g053250.t1.1.v5.5	4.32225	6.77016	4.35012	5.82927	6.36211	7.64401	6.52034	5.62996
Cre01.g053300.t1.1.v5.5	0.938907	18.595	56.6169	5.63546	1.49321	2.23456	3.42341	1.37967
Cre01.g053350.t1.1.v5.5	2.56923	1.40691	2.06685	3.37551	3.83254	3.33916	6.60052	4.78421
Cre01.g053360.t1.2.v5.5	1.43642	0.941756	0.869282	1.55893	1.14498	1.50941	2.46802	1.27672
Cre01.g053450.t1.1.v5.5	11.8126	9.68785	32.4668	10.3617	14.7472	15.2887	12.8604	7.40016
Cre01.g053500.t1.1.v5.5	9.50395	14.8056	15.4349	10.7094	10.7756	16.7697	18.407	10.6063
Cre01.g053550.t1.1.v5.5	1.95671	0.00726882	1.55235	1.33639	1.1729	0.189117	0.527725	2.34183
Cre01.g053600.t1.2.v5.5	4.78866	7.74396	8.07515	5.95592	4.65912	7.08267	4.78247	8.70105
Cre01.g053700.t1.1.v5.5	0.0120345	0.0117564	0.011494	0.0708618	0.026199	0.0405173	0.0200821	0.0976271
Cre01.g053750.t1.2.v5.5	2.91679	3.72009	1.42044	3.73008	1.74613	3.104	4.28072	4.17074
Cre01.g053800.t1.1.v5.5	3.27156	0.0133429	3.0258	2.86255	1.38357	0.400392	1.38961	3.64297
Cre01.g053850.t1.2.v5.5	0.745222	12.7114	5.94832	0.70186	0.803916	11.0002	4.18755	1.2481
Cre01.g053900.t1.1.v5.5	2.34297	2.79517	1.30808	2.55688	2.22732	2.33178	2.57195	2.77387
Cre01.g053950.t1.1.v5.5	0.0166121	1.12348	38.292	5.95393	0.0164342	2.04767	2.06384	0.0135872
Cre01.g054000.t1.2.v5.5	13.8415	14.8089	6.56583	13.4472	12.3526	11.6816	4.54933	8.64485
Cre01.g054050.t1.2.v5.5	106.351	47.1858	306.366	39.8728	56.5741	45.2149	44.3044	20.7891
Cre01.g054100.t1.1.v5.5	5.68705	5.56767	88.1528	8.30908	6.30276	3.51316	12.7146	5.48782
Cre01.g054150.t1.2.v5.5	31.389	90.0241	436.396	20.4075	31.3344	66.0627	109.445	16.5852
Cre01.g054200.t1.2.v5.5	17.9679	18.7124	62.2777	11.3257	11.7484	22.6848	18.9802	8.97832
Cre01.g054300.t1.1.v5.5	3.34321	2.27641	12.1161	1.65885	2.67602	7.68547	7.54559	1.81734
Cre01.g054350.t1.1.v5.5	1.61668	8.39347	4.69604	3.55289	3.38856	10.6542	8.93354	8.15474
Cre01.g054400.t1.1.v5.5	23.6193	27.5094	15.9651	14.5234	7.97221	16.663	16.7103	10.383
Cre01.g054500.t1.2.v5.5	455.802	2.97526	16.7356	51.0896	469.679	2.08161	101.968	86.7761
Cre01.g054550.t1.2.v5.5	0.203597	0.0283783	0.0485735	0.752436	0.615786	0.395214	1.07505	2.27459
Cre01.g054600.t1.1.v5.5	0.061767	0.0102384	0.0150149	0.207594	0.445149	0.164832	0.263294	0.781663
Cre01.g054650.t1.1.v5.5	1.6015	1.72355	0.292509	1.90493	1.23308	1.39837	1.70974	1.9679
Cre01.g054700.t1.2.v5.5	6.86783	3.59418	0.590792	5.70635	3.24627	3.57402	6.06212	4.16158
Cre01.g054750.t1.2.v5.5	1.58609	0.366079	0.620064	0.227669	2.01541	0.59525	0.293146	2.94617
Cre01.g054800.t1.2.v5.5	2.43851	4.38483	8.83158	4.70374	5.21034	10.029	11.9418	3.8008
Cre01.g054850.t1.2.v5.5	120.477	126.772	21.8958	76.2237	122.315	70.1854	65.7825	81.1099
Cre01.g054900.t1.2.v5.5	2.02233	3.00422	0.69069	2.32732	2.34874	3.25309	1.04932	2.52024
Cre01.g054950.t1.2.v5.5	1.84007	2.31862	0.815464	1.7316	2.42432	1.61842	1.76901	2.46504
Cre01.g055000.t1.1.v5.5	8.68301	12.0838	2.55653	6.72111	7.98659	10.7962	9.17692	5.91481
Cre01.g055050.t1.2.v5.5	3.9539	4.59438	0.690012	4.23332	1.64193	3.95871	1.69593	3.4836
Cre01.g055100.t1.1.v5.5	10.5791	0.825997	2.35904	3.61856	9.08447	2.35257	1.90212	12.9956
Cre01.g055151.t1.1.v5.5	0.0528117	6.16021	1.6042	0.377994	0.356364	8.17929	4.07179	0.485178
Cre01.g055200.t1.2.v5.5	2.36527	5.7548	4.66744	4.59213	3.39761	6.63778	3.97945	4.37793
Cre01.g055250.t1.2.v5.5	1.59259	1.36111	0.995104	1.44369	0.701833	0.556025	0.630075	1.19194
Cre01.g055300.t1.1.v5.5	0.591956	1.18924	2.40429	1.23179	0.849251	0.983151	1.21776	1.04785
Cre01.g055350.t1.2.v5.5	0.036834	0.0508824	0.0457985	0.0445019	0.117105	0.200367	0.112586	0.158563
Cre01.g055400.t1.2.v5.5	22.544	85.92	11.1723	32.3258	14.9579	40.6334	7.95277	19.7063
Cre01.g055404.t1.1.v5.5	1.72367	1.42192	2.48044	3.16865	1.12277	0.672855	1.2453	1.41858
Cre01.g055408.t1.1.v5.5	181.279	108.599	46.7889	40.7974	94.9905	62.7436	56.2763	63.3297
Cre01.g055412.t1.1.v5.5	1.29176	8.32389	18.9565	3.10011	0.307582	12.3357	5.35562	1.4922
Cre01.g055416.t1.1.v5.5	5.05577	28.3588	17.0892	10.892	4.42027	22.768	11.7256	8.21691
Cre01.g055420.t1.1.v5.5	91.9164	44.7304	33.7156	62.431	95.1902	63.3187	46.7937	65.6767
Cre01.g055424.t1.1.v5.5	1.68362	1.93903	0.664829	2.33404	2.38696	1.05067	1.15005	2.9655
Cre01.g055428.t1.1.v5.5	8.60884	2.76935	2.24835	3.37403	13.8484	7.25167	6.6889	6.8313
Cre01.g055432.t1.1.v5.5	11.802	5.67305	6.70935	6.25538	11.3212	10.4098	11.1494	6.85974
Cre01.g055436.t1.1.v5.5	0.958472	0.33656	1.98247	1.89733	1.19048	0.56407	1.41428	2.80517
Cre01.g055444.t1.1.v5.5	0.422164	0.358815	0.434401	1.17885	0.281892	0.31429	1.22663	1.33884
Cre01.g055448.t1.1.v5.5	0.127328	0.102129	0.152513	0.90349	0.0565846	0.0616017	0.619438	0.896394
Cre01.g055453.t1.1.v5.5	55.2573	66.7466	18.399	44.3192	43.7501	43.6177	29.3663	43.9299
Cre01.g055465.t1.1.v5.5	4.6147	3.49904	15.834	9.3324	8.49338	10.1347	7.337	8.91697
Cre01.g055469.t1.1.v5.5	2.32221	2.81421	0.336334	2.88721	1.07425	6.71957	1.83736	2.51176
Cre01.g055473.t1.1.v5.5	0.0215404	0.0129005	0.0063063	0.048247	0.0303566	0.0397499	0.0346966	0.0632359
Cre01.g055477.t1.1.v5.5	8.92779	7.00594	7.94084	2.30399	44.7057	12.6701	19.1533	9.88429
Cre01.g055500.t1.1.v5.5	1.54558	1.18831	0.995263	0.487743	4.67597	1.19743	2.0356	0.835302
Cre01.g055550.t1.2.v5.5	8.49258	11.0325	5.49796	5.56704	11.0382	4.78523	5.85671	9.06732
Cre01.g055600.t1.1.v5.5	0.336168	0.0869095	0.501682	0.63799	0.534588	0.277272	0.705043	1.19142
Cre01.g055966.t1.1.v5.5	1.35448	1.71369	1.43764	1.94278	1.78617	2.03069	1.68869	1.61159
Cre01.g056331.t1.1.v5.5	82.7374	6.77557	2.76388	7.62218	79.6987	6.65596	11.9386	9.75276
Cre01.g057061.t1.1.v5.5	4.15003	1.62072	0.0480322	3.21773	2.25792	1.17828	0.457775	2.12665
Cre01.g057791.t1.1.v5.5	0.90674	1.33909	1.26307	0.935344	0.854048	1.55828	1.0795	0.890107
Cre01.g058521.t1.1.v5.5	1.60785	8.07698	2.12576	3.23982	2.30039	6.32273	4.1481	3.55742
Cre01.g058886.t1.1.v5.5	10.9476	20.6215	6.32491	11.7869	5.45332	12.807	6.9707	6.05522
Cre01.g059252.t1.1.v5.5	8.01814	5.95551	20.9644	4.5103	11.5368	5.20789	11.7235	4.56944
Cre01.g059617.t1.1.v5.5	2.56047	3.13001	14.6031	2.30907	4.03763	2.3818	5.06224	1.87178
Cre01.g059982.t1.1.v5.5	1.70702	1.4744	3.24127	1.64158	2.84109	1.57935	3.99027	1.4489
Cre01.g060347.t1.1.v5.5	9.29716	6.70102	22.5744	8.89575	16.7374	5.4844	13.6199	10.4385
Cre01.g061077.t1.1.v5.5	123.948	151.546	1109.06	120.893	199.352	54.7596	215.555	41.2678
Cre01.g061442.t1.1.v5.5	17.2371	38.127	19.5268	15.6299	14.255	28.3234	17.2906	12.2269
Cre01.g061807.t1.1.v5.5	13.9303	70.7158	501.359	31.2575	8.69688	45.5385	16.4026	12.3881
Cre01.g062172.t1.1.v5.5	15.7347	16.9915	13.5158	7.01127	5.81703	3.55776	3.10557	3.15761
Cre01.g062537.t1.1.v5.5	15.9706	8.09314	4.62798	23.0381	10.5921	3.15912	9.69496	16.2099
Cre01.g062902.t1.1.v5.5	4.04756	8.70487	6.17164	7.55677	2.71469	5.74313	3.41578	3.26874
Cre01.g063267.t1.1.v5.5	12.9651	21.3445	0.416862	11.0183	7.91686	9.6208	1.83885	7.46558
Cre01.g063632.t1.1.v5.5	0.915861	0.828302	2.16018	4.26112	0.926124	1.89835	1.40524	2.36329
Cre01.g064362.t1.1.v5.5	2.89651	1.03175	0.147942	1.29609	9.61746	2.01245	2.29605	4.08689
Cre01.g064727.t1.1.v5.5	1.43888	0.218662	0.045538	0.192491	1.25396	0.213669	0.174836	0.628559
Cre01.g065457.t1.1.v5.5	0.236228	1.94421	62.4634	2.98573	0.143452	5.27399	6.67276	0.19839
Cre01.g065822.t1.1.v5.5	36.0473	3.46276	3.30966	6.99052	22.0408	4.64662	5.92906	11.8807
Cre01.g066187.t1.1.v5.5	0.783467	30.1006	1.18609	4.08767	0.619359	49.1727	8.53527	2.65806
Cre01.g066552.t1.1.v5.5	209.826	24.0212	24.7497	17.1529	147.472	26.6832	58.4998	31.2037
Cre01.g066917.t1.1.v5.5	5042.48	1080.5	1935	1085.71	12768.8	4509.62	2164.57	3371.89
Cre01.g068012.t1.1.v5.5	8.83049	0.499965	0.113131	1.87586	9.84579	2.05156	2.03173	3.06745
Cre01.g068377.t1.1.v5.5	10.6644	7.36515	0.734007	6.35205	4.53759	4.53665	1.63134	5.78397
Cre01.g068742.t1.1.v5.5	12.5099	8.23255	13.5007	8.31683	17.2917	18.3412	19.1375	14.469
Cre01.g069107.t1.1.v5.5	5.57175	20.3835	16.7265	15.6121	6.7236	15.6118	18.3089	11.0952
Cre01.g069472.t1.1.v5.5	6.05362	3.87313	9.36509	5.83721	3.87077	4.85203	5.78085	3.67786
Cre01.g069837.t1.1.v5.5	6.38297	0.563667	1.01541	1.18172	7.67287	1.89125	1.9845	2.37807
Cre01.g070202.t1.1.v5.5	6.24644	21.4867	38.7907	9.61774	8.9545	47.137	24.812	15.1521
Cre01.g070567.t1.1.v5.5	19.9865	16.3564	0.800839	14.1319	12.5918	10.6796	6.8577	13.7951
Cre01.g070932.t1.1.v5.5	6.48004	10.9372	5.1054	5.67004	10.662	11.2345	6.97354	8.66279
Cre01.g071662.t1.1.v5.5	1.1012	1.22505	1.2061	2.33323	4.78644	6.4014	3.34922	3.99047
Cre10.g417500.t1.2.v5.5	14.0867	23.5538	70.3376	15.2834	10.8458	22.1016	19.3732	15.2611
Cre10.g417550.t1.1.v5.5	7.7852	12.9956	38.559	9.9726	7.66238	11.7757	11.3694	8.61025
Cre10.g417600.t1.1.v5.5	2.41239	3.48102	1.40063	2.90007	1.00564	2.06999	0.483298	2.34478
Cre10.g417650.t1.1.v5.5	10.5669	9.5822	1.74119	8.79924	4.8107	6.63478	3.71279	7.32017
Cre10.g417700.t1.2.v5.5	5052.45	5630.77	8341.18	2713.6	5309.77	2915	3416.74	2518.43
Cre10.g417750.t1.1.v5.5	5.14572	30.9568	61.4053	8.10882	6.05778	41.7927	22.6053	8.42123
Cre10.g417850.t1.1.v5.5	2.70477	3.2413	3.01544	2.9234	4.49331	3.28299	5.05509	2.99355
Cre10.g417950.t1.2.v5.5	15.3471	15.607	1.12396	11.0345	6.10144	9.14488	4.13581	8.4372
Cre10.g418000.t1.2.v5.5	8.36344	7.59591	1.46926	8.12917	6.24688	6.02058	3.78193	6.51617
Cre10.g418100.t1.1.v5.5	14.2836	51.0102	159.312	38.4938	17.9681	36.6423	35.7969	22.3379
Cre10.g418200.t1.2.v5.5	14.26	28.388	60.275	19.505	8.80594	20.4098	18.7987	9.60605
Cre10.g418250.t1.2.v5.5	2.58092	0.0967332	1.59787	2.0898	1.32751	0.335198	0.749499	2.37118
Cre10.g418300.t1.2.v5.5	2.32335	12.5593	13.1173	3.94715	2.14986	6.31182	2.98906	3.33494
Cre10.g418350.t1.1.v5.5	15.4232	39.8431	28.5231	18.7159	26.7665	32.812	28.6565	26.1684
Cre10.g418400.t2.1.v5.5	0.203134	0.123851	0.033348	0.183993	0.362924	0.0637339	0.102199	0.182574
Cre10.g418450.t1.2.v5.5	2859.44	1536.64	1766.31	660.201	2204.34	1044.16	516.527	726.03
Cre10.g418600.t1.1.v5.5	1.99485	1.1269	1.1865	1.94127	4.80475	3.40841	4.84789	3.92088
Cre10.g418650.t1.1.v5.5	85.195	91.9671	109.838	69.7302	72.5241	39.6627	24.3352	43.2022
Cre10.g418700.t1.2.v5.5	8.8008	4.63535	5.90505	9.60174	4.29204	2.73181	5.71679	6.5228
Cre10.g418750.t1.1.v5.5	0.779073	1.16076	1.14563	1.74554	0.586037	1.03781	1.42496	1.2979
Cre10.g418800.t1.1.v5.5	1.55485	0.0517033	1.26423	1.40177	0.694682	0.0779074	0.500062	1.48341
Cre10.g418851.t1.1.v5.5	2.64412	4.21263	9.0378	3.23534	2.91892	3.5197	5.39446	2.80046
Cre10.g418900.t1.2.v5.5	3.78692	1.45968	1.22305	0.820621	2.3196	1.03129	1.12735	1.12614
Cre10.g419000.t1.2.v5.5	12.9241	34.3555	510.059	13.9398	13.4396	27.6545	18.4115	10.6741
Cre10.g419100.t1.1.v5.5	0.124893	0.153763	0.0201189	0.168559	0.570171	0.822932	0.669389	0.963305
Cre10.g419150.t1.1.v5.5	0.0145688	0	0	0.00972816	0.215698	0.0837514	0.288372	1.00961
Cre10.g419250.t1.2.v5.5	212.682	315.519	54.1957	155.361	137.518	136.125	57.4557	157.164
Cre10.g419300.t1.2.v5.5	0.139114	0.677726	0.517406	0.157532	0.443044	1.29555	0.127638	0.328149
Cre10.g419350.t1.1.v5.5	1.85362	1.19765	0.469115	1.72124	0.890039	1.27125	2.04407	1.85111
Cre10.g419400.t1.1.v5.5	1.07672	0.401285	0.599832	1.16735	0.398041	0.414608	0.538464	0.968042
Cre10.g419443.t1.2.v5.5	2.37562	2.56773	4.08929	0.50523	0.878787	1.58363	1.7786	0.88944
Cre10.g419450.t1.1.v5.5	26.3394	51.2816	51.9555	33.9748	27.0853	30.0012	25.9638	28.2591
Cre10.g419500.t1.2.v5.5	3.42202	12.6994	6.65945	6.9892	3.73741	11.092	7.66289	5.098
Cre10.g419550.t1.2.v5.5	0.322711	0.569362	3.78163	1.14156	0.285638	1.03257	1.20889	0.361685
Cre10.g419600.t1.2.v5.5	7.67635	11.9888	3.95075	7.91362	5.24269	4.53432	4.97548	5.6751
Cre10.g419650.t1.2.v5.5	35.9407	129.162	255.635	26.9497	47.9246	67.3008	59.8792	16.5238
Cre10.g419700.t1.1.v5.5	12.4782	7.75458	1.54736	5.49506	8.95959	6.17269	5.19206	8.45285
Cre10.g419750.t1.2.v5.5	11.0202	19.6961	14.3652	12.5394	8.99917	22.9953	6.98922	11.9738
Cre10.g419800.t1.2.v5.5	5.46523	12.6326	12.1026	8.64632	7.73656	16.5606	5.7271	7.95712
Cre10.g419850.t1.2.v5.5	3.05773	0.508127	0.228531	1.54154	2.91825	0.901924	0.659493	1.35439
Cre10.g419900.t1.1.v5.5	0.035888	0.0605827	0.228953	0.147567	0.0764738	0.20324	0.257724	0.299188
Cre10.g419950.t1.1.v5.5	4.57209	1.37539	0.674643	4.51192	3.80289	1.21737	1.21193	3.8058
Cre10.g420000.t1.1.v5.5	9.06173	3.79315	0.453103	3.46139	5.762	2.77574	1.82001	4.66228
Cre10.g420100.t1.2.v5.5	14.1742	25.3958	75.748	13.056	14.6043	23.7681	10.5892	10.1765
Cre10.g420150.t1.1.v5.5	2.4476	1.3287	0.322969	2.74398	1.63623	0.853531	1.21529	1.9144
Cre10.g420250.t1.1.v5.5	1.44483	2.08097	0.600793	2.37659	1.02081	1.43151	0.799245	1.17762
Cre10.g420350.t1.2.v5.5	1038.88	334.906	209.854	237.046	2322.7	417.271	167.852	515.39
Cre10.g420400.t1.1.v5.5	2.63456	2.12449	1.01454	3.30148	4.32665	2.50168	2.95568	3.24338
Cre10.g420450.t1.2.v5.5	0.660581	1.15679	0.106818	1.41141	0.795406	0.956054	0.993978	1.33992
Cre10.g420500.t1.1.v5.5	5.74106	2.82539	0.576609	2.3153	7.34039	3.52731	3.52295	3.84978
Cre10.g420537.t1.2.v5.5	4.04286	7.04076	6.96513	3.91495	3.33166	9.26549	6.10796	3.83213
Cre10.g420550.t1.1.v5.5	2.67021	5.91978	3.13488	2.54431	3.14306	9.5033	9.61722	4.78549
Cre10.g420551.t1.2.v5.5	1.19735	1.4408	1.34234	1.49078	0.895058	2.58019	2.73456	1.83123
Cre10.g420561.t1.2.v5.5	0.0796833	0.935255	0.0678808	0.508742	0.123901	1.57077	0.391591	0.246799
Cre10.g420600.t1.1.v5.5	0.11266	0.234351	0.0307063	0.124933	0.200379	1.37113	0.463026	0.244624
Cre10.g420650.t1.2.v5.5	0.730457	0.0319404	0.180446	0.310294	0	0	0	0.0150274
Cre10.g420700.t1.2.v5.5	273.448	182.462	153.041	163.685	261.555	62.8282	123.191	146.225
Cre10.g420750.t1.2.v5.5	8408.79	11481.1	17843.5	3853.08	6924.77	2592.15	4433.83	3099.96
Cre10.g420800.t1.1.v5.5	5.30802	0.19639	0.211095	1.19955	7.72836	1.14329	1.655	2.39776
Cre10.g420850.t1.1.v5.5	3.25727	0.398695	0.333847	0.430178	0.970248	0.710739	0.336984	0.567033
Cre10.g420900.t1.2.v5.5	15.8021	15.4627	3.86369	12.5129	7.38321	10.0536	2.12787	6.53948
Cre10.g420950.t1.2.v5.5	3.52186	7.61792	114.417	8.50039	4.17217	9.72979	20.766	2.41779
Cre10.g421000.t1.1.v5.5	1.21218	3.77783	4.40609	1.83554	1.39637	2.67158	2.86412	0.980784
Cre10.g421021.t1.2.v5.5	0.118235	0.291241	0.0664872	0.315217	0.650683	0.756913	0.149732	0.336426
Cre10.g421050.t1.1.v5.5	2.24432	1.79438	0.410312	2.09678	1.68776	2.00704	1.72863	1.78232
Cre10.g421079.t1.2.v5.5	15.1882	18.081	4.28777	15.0896	16.242	12.522	9.89522	12.9443
Cre10.g421100.t1.1.v5.5	3.23443	0.0611945	0.318862	1.48365	4.27865	0.206711	3.48838	2.06788
Cre10.g421150.t1.1.v5.5	0.247537	0.572869	0.359089	0.771327	0.396384	0.849281	0.46437	0.571838
Cre10.g421200.t1.1.v5.5	28.5783	26.2933	3.0874	24.4836	9.55128	13.2872	7.37753	12.7565
Cre10.g421250.t1.2.v5.5	6.17853	18.6986	114.877	15.8914	5.11644	10.4956	11.9685	5.81171
Cre10.g421300.t1.2.v5.5	14.8335	3.38113	0.561826	8.48526	2.61203	0.8498	0.88765	7.96383
Cre10.g421350.t1.2.v5.5	57.3915	1.25456	11.655	9.54666	24.2107	7.56825	2.61731	15.4732
Cre10.g421400.t1.2.v5.5	0.567765	1.22101	0.18071	1.41855	0.964053	0.997975	0.867352	1.42866
Cre10.g421450.t1.1.v5.5	2.63279	1.79367	0.281616	1.68801	4.337	2.45864	2.0923	5.30581
Cre10.g421500.t1.1.v5.5	0.645809	1.3944	0.983934	1.73212	0.850464	2.56765	1.93532	3.10945
Cre10.g421600.t1.2.v5.5	43.3753	53.8528	87.8488	23.4535	29.9069	43.2138	66.2549	17.7159
Cre10.g421650.t1.2.v5.5	7.18205	6.61105	7.43491	6.40807	10.1906	4.25791	10.5293	4.675
Cre10.g421700.t1.2.v5.5	11.9223	11.08	4.24235	13.2446	33.0488	5.40748	10.8064	18.9443
Cre10.g421850.t1.2.v5.5	16.5811	23.9959	11.7456	12.7584	19.3783	21.7042	18.0929	16.1426
Cre10.g421900.t1.1.v5.5	1.07837	0.861396	0.211443	0.657845	6.3648	1.60995	3.27798	2.77634
Cre10.g422000.t1.2.v5.5	16.0793	7.57842	0.412314	11.7628	4.77284	3.92666	1.40091	7.10529
Cre10.g422050.t1.2.v5.5	3.26612	8.47554	46.3893	3.4321	5.39835	12.4982	4.80202	3.13124
Cre10.g422100.t1.2.v5.5	0.882753	0.252217	3.8736	1.17898	0.848986	0.565362	1.39157	1.48018
Cre10.g422150.t1.1.v5.5	2.668	2.61978	16.2017	7.41234	1.38634	3.3171	5.85643	2.71832
Cre10.g422201.t1.1.v5.5	1.60731	1.59667	0.832455	1.40419	1.16739	1.71337	2.94178	1.46157
Cre10.g422250.t1.1.v5.5	1.99669	2.1723	3.00499	1.8457	2.12964	2.24334	3.64007	1.82971
Cre10.g422300.t1.2.v5.5	6.64962	98.5748	340.66	14.2734	2.2651	181.826	58.8256	22.249
Cre10.g422350.t1.1.v5.5	0.20992	0.407218	0.690558	0.742132	0.415055	0.680697	1.07714	1.14515
Cre10.g422400.t1.1.v5.5	0.974286	0.825289	0.248279	1.10113	1.18999	1.01613	1.27169	1.34641
Cre10.g422419.t1.2.v5.5	0.86383	1.68294	0.242103	2.33064	1.43167	1.22571	1.817	1.46747
Cre10.g422450.t1.2.v5.5	2.51118	7.47671	9.76142	7.13266	2.59661	19.6918	11.4347	7.80129
Cre10.g422500.t1.1.v5.5	1.67759	0.769086	0.0341635	1.14062	1.78131	0.192097	0.577938	1.9097
Cre10.g422550.t1.2.v5.5	0.394638	0.581742	0.043716	1.47616	2.41965	0.1493	0.535526	1.13269
Cre10.g422600.t1.1.v5.5	71.9401	49.2584	66.6864	38.7793	60.4334	41.7783	55.244	34.9304
Cre10.g422650.t1.1.v5.5	0.956763	0.226468	0.261927	1.29758	0.411639	0.3365	0.909131	1.27774
Cre10.g422700.t1.2.v5.5	19.4955	0.873963	0.465659	5.38515	17.2601	0.48693	2.58246	5.43895
Cre10.g422718.t1.2.v5.5	2.63308	0.387735	0.150074	0.403554	2.56063	0.829679	1.08001	1.48069
Cre10.g422750.t1.1.v5.5	1.87511	0.776461	0.409816	0.510441	4.06257	0.948623	0.876982	1.4793
Cre10.g422800.t1.1.v5.5	11.8954	4.71145	1.38544	7.31505	6.58738	11.7291	6.1055	7.10247
Cre10.g422850.t1.1.v5.5	1.41793	0.205996	0.411114	1.75306	8.83095	2.72735	2.16741	7.44624
Cre10.g422900.t1.1.v5.5	8.75162	2.41121	18.8563	5.72971	9.30631	3.27624	5.37715	5.37613
Cre10.g423200.t1.1.v5.5	3.29826	0.0406041	0.0996641	1.30995	2.5367	0.0143909	0.297413	1.57728
Cre10.g423250.t1.2.v5.5	34.8101	14.3555	57.1113	28.1735	126.954	13.3136	43.2561	39.9937
Cre10.g423300.t1.1.v5.5	11.399	4.12271	21.465	14.5332	21.5432	1.831	15.0919	9.89354
Cre10.g423350.t1.2.v5.5	6.05758	15.1725	22.5053	6.56798	7.59929	11.5367	7.7823	4.03369
Cre10.g423450.t1.2.v5.5	27.5664	10.8218	83.3471	8.02188	32.8948	9.36352	22.6991	9.45455
Cre10.g423500.t1.2.v5.5	112.534	96.3181	339.791	69.3498	95.4383	64.0524	133.48	46.2084
Cre10.g423550.t1.1.v5.5	12.914	36.3165	853.355	113.738	15.5453	6.67212	26.9694	6.97669
Cre10.g423600.t1.1.v5.5	1.12053	0.0348124	0.741654	0.443217	0.414784	0.0727089	0.414676	0.715607
Cre10.g423650.t1.2.v5.5	278.392	289.863	198.191	108.055	194.469	292.335	263.47	113.572
Cre10.g423700.t1.1.v5.5	1.86432	2.70987	0.331926	2.22798	0.546757	2.93985	0.730695	1.30861
Cre10.g423750.t1.2.v5.5	0.890313	5.29296	2.66842	1.93364	1.65567	5.14661	3.56298	2.41743
Cre10.g423800.t1.1.v5.5	1.11118	0.942145	2.26786	1.58274	1.21461	0.882711	1.95789	1.31889
Cre10.g423850.t2.1.v5.5	0.117079	0	0.160159	0.0641134	0.10563	0.00608266	0.0331364	0.269249
Cre10.g423950.t1.2.v5.5	5.60387	10.7868	10.5231	7.03001	4.53522	9.4447	6.61469	6.67905
Cre10.g424000.t1.1.v5.5	8.8464	0.915435	0.521462	1.29453	8.76847	1.70809	1.62436	1.90362
Cre10.g424050.t1.1.v5.5	5.74177	3.67204	8.3959	3.80553	5.70543	7.49576	5.61264	3.17093
Cre10.g424100.t1.2.v5.5	1210.15	1096.47	2123.84	729.939	775.73	448.754	588.877	284.569
Cre10.g424150.t1.2.v5.5	18.9327	39.413	67.0139	35.1655	43.9045	27.6861	36.8187	32.896
Cre10.g424200.t1.1.v5.5	0.978118	0.0545564	0.594834	1.43184	0.905038	0.32654	0.680748	1.25254
Cre10.g424250.t1.2.v5.5	97.3584	6.73955	6.34929	8.06773	128.083	18.304	12.7895	24.8407
Cre10.g424300.t1.2.v5.5	5.13156	1.02661	3.78513	1.63998	6.06833	1.34864	2.10263	2.64289
Cre10.g424350.t1.1.v5.5	2.24434	32.1447	764.743	19.3306	2.74154	33.7345	65.6406	3.04288
Cre10.g424400.t1.2.v5.5	28.3221	129.826	447.341	71.2099	45.3418	84.7447	93.1602	51.0075
Cre10.g424450.t1.2.v5.5	17.9757	57.3663	17.153	19.9116	16.4162	43.5976	20.3631	22.0519
Cre10.g424500.t1.2.v5.5	2.61314	2.87309	0.888963	5.27901	1.288	1.77274	5.29443	4.75055
Cre10.g424550.t1.1.v5.5	174.912	15.7881	27.4339	36.1659	163.88	33.4856	137.042	64.7333
Cre10.g424600.t1.1.v5.5	7.90068	0.924708	0.688901	1.88549	10.2812	2.31069	2.54556	2.86395
Cre10.g424650.t1.2.v5.5	18.4128	54.9743	82.9456	19.0011	29.5765	58.432	31.7759	23.1765
Cre10.g424700.t1.1.v5.5	0.470201	0.042627	0.413549	0.51109	3.35722	0.710696	1.98173	1.30806
Cre10.g424750.t1.2.v5.5	0.407304	0.704136	0	0.0124014	0.742618	0.164242	0.0521331	0.0965617
Cre10.g424775.t3.1.v5.5	0.972849	1.23489	0.313396	0.389152	0.553622	1.41791	0.991779	1.04733
Cre10.g424850.t1.2.v5.5	13.8776	18.1532	37.1674	13.2076	12.4706	29.3362	17.7754	11.9704
Cre10.g424900.t1.2.v5.5	4.41898	25.385	26.8309	8.35348	3.70968	47.9668	22.2018	8.44992
Cre10.g425000.t1.1.v5.5	4.2004	4.04022	4.65366	3.26646	9.95819	5.94115	4.53735	4.65688
Cre10.g425050.t1.1.v5.5	57.532	14.244	2.40691	26.3707	18.3943	8.12644	2.29281	11.5002
Cre10.g425100.t1.2.v5.5	0.292835	0.672886	0.7911	1.55729	0.63068	1.47196	1.32436	0.698562
Cre10.g425150.t1.1.v5.5	0.710725	0.754834	0.387558	0.93103	0.727663	0.756961	0.867629	0.629698
Cre10.g425200.t1.1.v5.5	1.788	1.09424	0.231137	0.699265	2.41412	0.236301	0.797066	1.08428
Cre10.g425251.t1.1.v5.5	0.337175	0.458802	0.0282352	1.06791	2.06376	0.156868	0.187264	1.98746
Cre10.g425300.t1.1.v5.5	3.18478	4.10733	3.02451	7.96027	2.73867	1.81225	3.5126	4.76416
Cre10.g425350.t1.2.v5.5	2.21215	1.1766	3.62259	1.63316	4.21059	1.13509	2.15057	1.72734
Cre10.g425400.t1.2.v5.5	1.64099	4.00828	6.77108	2.97106	2.13304	5.18325	4.59878	2.538
Cre10.g425450.t1.2.v5.5	0.736603	0.862012	0.944966	1.04404	0.400856	0.760568	3.05518	1.11481
Cre10.g425501.t1.1.v5.5	2.20148	3.28334	0.885499	2.8046	2.13144	4.12048	3.57238	2.48691
Cre10.g425550.t1.1.v5.5	0.656336	1.74717	3.77107	1.93837	1.23983	5.05223	4.16728	1.59257
Cre10.g425650.t1.2.v5.5	1.88161	6.16187	1.58198	3.95079	1.44632	5.33374	3.94655	3.38532
Cre10.g425675.t1.1.v5.5	0.814426	2.49708	0.472533	2.53061	0.806871	1.88359	0.97702	1.2688
Cre10.g425700.t1.2.v5.5	0.70907	1.39676	0.373775	1.05378	0.904809	1.43639	0.939338	1.22161
Cre10.g425750.t1.1.v5.5	4.79164	6.53099	34.2902	11.6167	3.84012	4.65982	6.54902	3.54936
Cre10.g425800.t1.2.v5.5	3.47999	11.3342	7.11673	8.18589	3.48937	10.381	6.4202	6.31564
Cre10.g425850.t1.2.v5.5	20.9319	22.3293	40.3958	8.53012	2.08795	10.5954	11.13	2.98325
Cre10.g425900.t1.2.v5.5	910.565	174.652	46.5617	139.176	1497.16	218.565	15.9721	323.008
Cre10.g425950.t1.2.v5.5	9.60645	17.6821	15.9663	12.9187	10.7598	18.1945	13.376	11.304
Cre10.g426000.t1.2.v5.5	13.351	48.8393	16.6816	21.2829	3.73472	21.9574	7.83873	10.2502
Cre10.g426050.t1.2.v5.5	0.0739481	0.0140838	0	0.544812	0.285781	0.1018	0.826822	0.133168
Cre10.g426152.t1.1.v5.5	2.85799	1.40519	77.9788	13.214	6.9719	1.05132	19.9671	0.804339
Cre10.g426200.t1.1.v5.5	0.4728	1.97544	0.417194	1.25174	0.315645	1.53933	0.540116	1.0341
Cre10.g426250.t1.1.v5.5	6.62587	25.4308	1.79773	7.54686	2.81794	15.8578	2.87916	6.19248
Cre10.g426292.t1.1.v5.5	0.129688	0.027418	0	0.390917	0.137529	0.120938	0.104559	0.250981
Cre10.g426400.t1.1.v5.5	14.1464	19.2594	58.4222	13.3822	8.57558	15.3349	14.7041	8.71307
Cre10.g426450.t1.2.v5.5	5.09841	0.972319	0.337405	5.66896	14.5335	0.138977	2.93315	8.38498
Cre10.g426500.t1.2.v5.5	74.4471	32.8067	186.942	11.221	110.45	38.8087	70.9322	19.4937
Cre10.g426550.t1.2.v5.5	0.301343	1.01835	1.9685	1.29463	0.246491	0.456864	0.458944	0.995289
Cre10.g426600.t1.2.v5.5	1.93272	3.27148	0.277859	2.33511	1.51399	2.47692	1.8504	2.64827
Cre10.g426616.t1.1.v5.5	4.91423	1.04938	23.0172	2.3352	4.64153	4.45103	4.60588	2.42007
Cre10.g426632.t1.1.v5.5	11.2429	11.7002	47.7208	9.11613	7.93106	9.57954	10.4467	7.24781
Cre10.g426700.t1.1.v5.5	0.626273	5.75276	0.358136	1.7205	0.418019	3.41849	1.62351	2.32007
Cre10.g426750.t1.2.v5.5	7.67018	7.03638	1.01964	4.64653	8.0132	6.04323	3.93913	7.19239
Cre10.g426800.t1.1.v5.5	60.8158	0.266856	0.0998516	0.345226	52.6674	0.326088	0.511501	3.65476
Cre10.g426850.t1.1.v5.5	1.95027	0.0234753	0	0.143301	1.32934	0	0.0344571	0.250117
Cre10.g426900.t1.1.v5.5	0.461719	0.0114594	0.0634735	0.225619	0.300279	0.0511923	0.0840032	0.365753
Cre10.g426950.t1.2.v5.5	2.05313	2.06446	18.6128	6.93799	0.195354	0.891079	0.543821	0.430667
Cre10.g427000.t1.2.v5.5	2.32892	4.4309	15.5587	3.98692	2.53107	3.06815	3.04898	1.95309
Cre10.g427050.t1.2.v5.5	2.66841	7.08642	2.30473	5.02314	2.04307	3.21685	3.60384	2.45717
Cre10.g427150.t1.2.v5.5	11.6502	26.4915	12.6138	15.3926	8.42347	16.5655	7.59746	10.9711
Cre10.g427250.t1.2.v5.5	66.3684	198.564	453.269	140.744	95.2217	191.864	147.559	92.4322
Cre10.g427300.t1.2.v5.5	26.985	1.05754	3.65375	3.44632	36.4441	3.87835	6.1704	9.20792
Cre10.g427350.t1.1.v5.5	1.45993	5.3052	0.611965	2.11086	2.52183	4.56682	2.43705	4.52651
Cre10.g427400.t1.2.v5.5	11.2383	13.8507	118.812	13.9469	17.2923	19.9876	23.1997	11.8841
Cre10.g427453.t1.1.v5.5	0.582803	0.340923	0.0433575	0.612067	0.38798	0.20188	0.527227	0.902751
Cre10.g427500.t1.2.v5.5	0.433268	0.217452	0	0.670999	0.141106	0.0975604	0.385272	0.345225
Cre10.g427550.t1.1.v5.5	2.49599	2.07953	1.31423	3.29462	2.71879	4.58601	3.80384	4.20178
Cre10.g427600.t1.2.v5.5	3.8184	5.75827	13.7634	5.06496	3.2581	6.26655	7.55967	4.7253
Cre10.g427650.t1.2.v5.5	2.63576	4.06211	23.7092	4.85942	1.96743	4.94528	5.35497	3.86014
Cre10.g427700.t1.2.v5.5	61.4063	120.62	61.6497	98.2582	50.8035	82.3071	38.4329	71.2892
Cre10.g427750.t1.2.v5.5	3.33194	1.54151	0.608442	2.68794	1.44001	1.46339	1.23653	2.01549
Cre10.g427800.t1.1.v5.5	6.78124	4.43209	2.50025	4.79822	16.2874	6.20461	4.88206	8.95183
Cre10.g427850.t1.1.v5.5	2.14282	3.31849	0.976676	1.56659	3.95459	2.61558	2.08202	1.94802
Cre10.g427900.t1.1.v5.5	1.57245	0.544548	0.206557	0.779443	2.81886	0.49464	1.19065	1.30344
Cre10.g427950.t1.1.v5.5	5.41506	10.3145	15.2116	2.89043	12.0094	8.2555	8.40389	6.17371
Cre10.g428000.t1.1.v5.5	2.37766	3.8054	3.65749	2.11771	0.466676	2.81584	1.69314	0.791195
Cre10.g428050.t1.1.v5.5	5.36579	7.42361	7.16866	11.9801	4.33926	13.5089	7.71377	8.88202
Cre10.g428100.t1.1.v5.5	0.990688	0.988851	0.0800111	1.87615	0.432339	0.64997	0.620278	1.08573
Cre10.g428150.t1.1.v5.5	0.347558	11.518	1.01464	1.85427	0.547175	5.12358	0.627935	1.99157
Cre10.g428200.t1.2.v5.5	34.7147	66.3497	56.5321	35.576	30.223	62.9528	26.1747	32.4416
Cre10.g428250.t1.1.v5.5	3.17347	2.96692	4.46696	3.82007	4.72027	2.10882	5.47006	4.91995
Cre10.g428300.t1.1.v5.5	2.45212	3.79977	6.08769	3.66469	2.90649	4.47601	3.04841	4.28398
Cre10.g428350.t1.2.v5.5	1.98559	7.51547	1.919	3.53225	2.97629	8.67127	3.48376	5.4915
Cre10.g428400.t1.1.v5.5	0.827744	1.36924	0.255392	1.38999	0.894414	1.87689	1.29256	1.23096
Cre10.g428500.t1.1.v5.5	4.73756	5.33131	4.12688	4.85669	2.1464	3.95822	3.11234	3.00423
Cre10.g428550.t1.2.v5.5	1.67306	18.4509	1.32328	2.1994	0.594995	4.2063	2.53983	0.83383
Cre10.g428600.t1.1.v5.5	0.795765	5.26168	1.01969	1.33221	0.621859	1.21154	1.4077	0.955289
Cre10.g428650.t1.2.v5.5	24.4411	19.2326	84.2484	12.6585	25.9071	21.1413	32.5824	16.682
Cre10.g428664.t1.1.v5.5	20.1386	5.4086	1.55686	4.31564	13.441	3.23571	2.77496	5.71318
Cre10.g428678.t1.1.v5.5	4.31111	14.8175	0.820529	5.76268	2.7032	12.7236	4.52281	3.72052
Cre10.g428692.t1.1.v5.5	0.416658	0.773897	3.59612	0.586262	1.29465	3.5717	3.62501	0.777765
Cre10.g428706.t1.1.v5.5	2.8015	3.21392	0.779033	1.77712	3.42675	1.4782	2.56715	1.63625
Cre10.g428720.t1.1.v5.5	1.00118	3.06742	5.54478	1.34962	1.79982	2.03807	3.76578	2.48751
Cre10.g428734.t1.1.v5.5	1.61863	3.72294	17.6336	2.35232	2.42622	7.09448	5.57223	1.52959
Cre10.g428750.t1.1.v5.5	28.5614	22.5714	1.04386	20.3129	17.5334	12.8848	3.48944	16.1821
Cre10.g428800.t1.2.v5.5	20.9252	15.955	109.827	20.9978	14.5363	16.8203	12.286	11.437
Cre10.g428850.t1.2.v5.5	69.0001	7.24762	11.4312	12.9915	64.367	13.9893	16.6501	24.4725
Cre10.g428900.t1.1.v5.5	4.25981	4.84541	1.97065	2.73824	2.28893	5.08325	4.23278	2.27398
Cre10.g428950.t1.2.v5.5	1.11792	0.362887	5.51049	0.85275	0.23289	0.494253	26.7329	0.607331
Cre10.g428966.t1.2.v5.5	0.201461	0.412937	37.6819	16.3834	1.14622	0.574013	0.535239	0.992174
Cre10.g429000.t2.1.v5.5	0.135907	2.73556	15.839	11.6768	1.59702	0.651533	0.317609	0.675215
Cre10.g429017.t1.2.v5.5	2.77413	2.31585	3.39702	3.01465	5.6987	3.91505	4.36465	4.73526
Cre10.g429050.t1.1.v5.5	3.81322	5.97045	10.8305	6.45146	4.95726	7.53549	6.31851	4.81822
Cre10.g429100.t1.2.v5.5	60.2127	71.89	417.79	111.897	49.7122	43.955	42.6284	26.3165
Cre10.g429150.t1.2.v5.5	12.0704	23.2262	7.52362	15.1956	12.8716	23.7321	15.3999	17.7898
Cre10.g429200.t1.1.v5.5	2.09821	1.98011	0.461776	1.6326	1.22646	2.99459	3.14325	2.23857
Cre10.g429250.t1.1.v5.5	2.65592	1.91937	1.00954	1.61192	1.77049	1.61219	1.26086	1.72707
Cre10.g429300.t1.1.v5.5	2.48806	2.11163	1.16953	3.14176	2.75488	1.66533	2.50427	2.97156
Cre10.g429350.t1.2.v5.5	9.44754	2.86083	0.138264	5.67275	4.85562	1.4363	1.37973	4.02238
Cre10.g429400.t1.1.v5.5	3.23604	3.08467	0.999556	2.06484	2.82969	3.71867	2.65131	2.26551
Cre10.g429450.t1.1.v5.5	0.0449911	0.198757	0	0.0105514	0.297712	0.454421	0.259348	0.527892
Cre10.g429550.t1.2.v5.5	9.95235	17.5746	24.1199	10.3811	11.9751	15.6577	13.4884	12.1506
Cre10.g429600.t1.2.v5.5	9.58319	7.02148	26.0967	3.97629	7.6773	7.29048	11.8867	4.37703
Cre10.g429601.t1.1.v5.5	5.89673	7.42883	1.08074	4.79689	3.51093	6.95994	2.33028	3.47829
Cre10.g429650.t1.1.v5.5	0.623459	0.626349	0.121466	0.801732	0.135367	0.389734	1.14567	0.626346
Cre10.g429702.t1.1.v5.5	0.167395	0.00974133	0	0.0614202	0.202662	0.0101263	0.0214062	0.0457905
Cre10.g429750.t1.1.v5.5	9.15515	4.6634	2.82387	1.96574	6.67568	6.4397	4.01655	2.74185
Cre10.g429800.t1.2.v5.5	0.187248	13.5107	1.25235	1.50304	0.180141	11.4545	2.71807	1.53242
Cre10.g429850.t1.2.v5.5	5.99505	4.50073	1.64476	4.70137	4.46002	2.15655	6.98684	3.11904
Cre10.g430000.t1.1.v5.5	36.8166	9.34033	17.1533	13.6568	64.873	25.4253	15.8949	22.421
Cre10.g430050.t1.2.v5.5	13.1119	9.89494	33.0377	8.79525	6.41435	12.3171	10.0853	13.1702
Cre10.g430100.t1.1.v5.5	2.57581	1.54703	1.69078	3.42343	4.10046	1.45634	5.3662	3.33411
Cre10.g430150.t1.2.v5.5	10.578	43.6993	36.5186	10.4293	11.5779	37.891	28.2929	12.3815
Cre10.g430250.t1.2.v5.5	2.71838	3.69643	0.564727	4.28719	1.25794	3.78616	3.27698	5.17278
Cre10.g430300.t1.2.v5.5	3.03147	6.29308	5.57889	4.11488	1.25317	3.95705	3.26009	3.83266
Cre10.g430350.t1.2.v5.5	27.6552	16.3424	54.0909	8.32814	19.1926	17.7069	18.5301	8.04309
Cre10.g430376.t1.1.v5.5	0.932248	1.32285	1.36943	0.599656	1.21868	1.03743	1.15273	1.36815
Cre10.g430400.t1.2.v5.5	7746.06	8076.21	14989.3	2961.25	7881.86	2119.52	4253.7	3580.83
Cre10.g430450.t1.2.v5.5	86.687	13.3516	2.8473	23.5729	66.1444	5.10605	12.3763	19.6216
Cre10.g430501.t1.1.v5.5	36.9805	49.4066	4.83311	21.154	30.5718	41.582	34.2664	26.3054
Cre10.g430550.t1.2.v5.5	5.63062	19.7783	52.5215	14.249	5.72659	7.07956	12.9845	4.59959
Cre10.g430650.t1.2.v5.5	12.7757	2.7937	3.79493	4.17931	6.99869	2.78935	2.58093	3.52094
Cre10.g430700.t1.1.v5.5	1.66933	0.118667	0.208331	0.694242	2.333	0.12674	0.837754	0.902001
Cre10.g430750.t1.1.v5.5	45.1994	15.0317	15.4901	5.94487	47.0372	9.84712	15.6271	8.03031
Cre10.g430800.t1.1.v5.5	7.08981	48.1148	49.7644	9.59259	5.58798	18.2028	7.54013	10.1651
Cre10.g430850.t1.2.v5.5	3.26322	6.84566	6.37867	3.7013	2.42159	8.09133	4.07465	2.95957
Cre10.g430900.t1.1.v5.5	0.479601	0.0685168	0.277443	1.16178	0.612154	0.16741	0.531428	1.84544
Cre10.g430950.t1.1.v5.5	0.249905	0	0.24188	0.496746	0.591621	0.164796	0.62582	1.64195
Cre10.g431000.t1.1.v5.5	0	0.0123117	0.0519122	0.0705028	0.070314	0.0237878	0.248367	0.897426
Cre10.g431100.t1.1.v5.5	2.32676	6.71865	1.33241	3.0551	2.40515	4.12666	1.76518	3.11146
Cre10.g431150.t1.1.v5.5	12.8039	10.449	7.9571	9.11434	6.56235	7.88843	5.49044	7.0324
Cre10.g431200.t1.2.v5.5	0.16303	0.061676	0.0750681	0.144097	0.201483	0.155996	0.132541	0.165504
Cre10.g431250.t1.1.v5.5	0.730132	0.508017	0.127507	0.220632	10.3462	3.77702	4.32177	2.31154
Cre10.g431350.t1.1.v5.5	17.5989	28.5291	60.9882	12.2318	44.5732	36.8432	20.6042	18.0926
Cre10.g431400.t1.2.v5.5	1.54169	37.6063	373.871	35.0739	0.879642	4.51035	3.34246	2.22534
Cre10.g431450.t1.1.v5.5	6.57297	29.7073	132.496	23.36	4.25737	6.52261	5.23105	5.63803
Cre10.g431500.t1.1.v5.5	8.01082	8.11482	24.737	4.97368	12.1781	9.12985	11.0797	5.29991
Cre10.g431550.t1.1.v5.5	5.235	10.3762	23.1675	6.49176	4.56742	6.30464	14.4296	6.9522
Cre10.g431602.t1.1.v5.5	0.0876714	0.138578	2.58113	0.61419	0	0.377813	0.660162	0.335236
Cre10.g431650.t1.2.v5.5	3.33288	3.43874	1.30368	4.27678	3.12975	1.68816	3.31287	4.40522
Cre10.g431700.t1.2.v5.5	8.41798	5.78317	5.4631	6.44932	7.17303	2.40482	5.91833	5.41324
Cre10.g431750.t1.1.v5.5	0.105624	0.128125	0.0864077	0.32013	0.113721	0.16019	0.216896	0.346514
Cre10.g431800.t1.2.v5.5	17.7208	28.8125	4.0657	15.0651	13.5815	37.4506	5.56128	33.003
Cre10.g431850.t1.2.v5.5	12.5295	6.70695	2.05064	6.64552	12.6114	9.77673	9.99418	10.4595
Cre10.g431900.t1.2.v5.5	0.54834	4.29861	0.853012	0.83804	0.157872	3.45756	0.552934	0.409309
Cre10.g431950.t1.2.v5.5	36.7841	8.59661	4.91938	7.76615	55.4548	8.85605	13.1927	18.5367
Cre10.g432000.t1.2.v5.5	2.66836	7.38474	1.85813	5.67707	4.18266	15.401	5.27595	7.62046
Cre10.g432100.t1.2.v5.5	207.57	169.396	322.565	73.8954	303.641	96.8043	144.035	89.7091
Cre10.g432150.t1.2.v5.5	3.13451	0.492608	0.302193	0.293535	5.20423	1.46477	1.29541	1.04402
Cre10.g432200.t1.2.v5.5	5.32104	11.3724	8.03565	5.68941	4.30498	10.4863	4.69404	5.81639
Cre10.g432250.t1.1.v5.5	0.692025	0.529641	0.320165	1.02883	0.043798	0.0829675	0.0270015	0.132635
Cre10.g432301.t1.1.v5.5	2.05981	0.388278	0.343866	2.23016	0.966179	0.392647	1.21327	1.83209
Cre10.g432400.t1.2.v5.5	4.87216	1.44882	0.100404	4.24401	2.53466	0.522438	1.12782	3.18227
Cre10.g432450.t1.1.v5.5	0.0770551	0.0278566	0.126054	0.035087	12.7179	5.10193	7.73803	7.50385
Cre10.g432500.t1.2.v5.5	1.4946	0	2.78359	1.44089	1.11784	0.251753	0.821947	2.45831
Cre10.g432550.t1.2.v5.5	10.9969	1.45348	0.377688	2.93712	6.05012	3.40596	2.61761	4.13806
Cre10.g432600.t1.1.v5.5	6.18287	6.63981	7.19811	4.43077	23.0274	15.2569	17.5248	11.302
Cre10.g432650.t1.1.v5.5	2.99654	1.83023	2.22847	2.40211	6.64825	2.91259	5.76332	3.75637
Cre10.g432700.t1.1.v5.5	1.56347	7.10908	78.7126	8.3972	2.02266	1.94904	2.37165	2.47422
Cre10.g432750.t1.1.v5.5	5.24101	11.6099	36.3117	11.0826	2.86554	2.58115	0.982829	3.04951
Cre10.g432770.t1.2.v5.5	7.66107	0.734915	0.690652	1.01038	9.04905	1.50839	1.59221	2.54171
Cre10.g432800.t1.2.v5.5	1997.38	2282.06	4271.63	1252.47	3005.37	1530.5	2063.46	1204.98
Cre10.g432850.t1.2.v5.5	48.5705	2.75714	6.63095	4.89103	54.5659	7.71223	7.0505	12.8241
Cre10.g432900.t1.2.v5.5	24.626	95.767	837.944	74.2404	12.7866	20.3064	25.5218	9.70139
Cre10.g432950.t1.1.v5.5	0.480893	0.226136	0.841425	0.416768	0.128808	0.209486	0.273848	0.303595
Cre10.g433000.t1.1.v5.5	11.4475	17.5987	10.6836	7.71591	6.17966	26.2922	22.2544	8.22062
Cre10.g433050.t1.1.v5.5	5.68567	0.0308901	3.48117	3.0133	3.72414	0.178728	2.30362	6.36659
Cre10.g433100.t1.2.v5.5	13.4509	24.4935	1.33671	13.3041	5.93141	11.924	6.76637	7.31235
Cre10.g433150.t1.2.v5.5	0.877734	1.59808	0.583241	1.85342	1.03314	1.46942	1.64485	1.35158
Cre10.g433300.t1.1.v5.5	0.660939	3.07685	1.15784	2.3459	1.29341	3.92188	3.36182	3.58129
Cre10.g433350.t1.1.v5.5	1.13426	1.42376	0.778186	1.54306	1.38335	0.55472	1.20708	1.99229
Cre10.g433400.t1.2.v5.5	27.2664	48.183	47.2171	25.5261	33.267	31.7753	36.9646	25.8144
Cre10.g433450.t1.2.v5.5	2.57634	0.48056	0.173388	1.07902	2.96737	2.23155	2.47106	1.45769
Cre10.g433476.t1.1.v5.5	0.139009	0.160457	0.0143341	0.697884	0.998895	0.350695	0.459339	1.68049
Cre10.g433500.t1.1.v5.5	0.0586012	0.0652873	0	0.306671	0.18393	0.071235	0.102277	0.23127
Cre10.g433550.t1.1.v5.5	1.61668	0.426849	0.361971	1.51071	1.25163	0.209924	1.0448	0.989752
Cre10.g433600.t1.2.v5.5	34.2205	331.11	178.697	15.3396	40.4753	87.7462	187.087	14.0751
Cre10.g433650.t1.1.v5.5	0.572427	12.6835	0.58464	0.890423	0.322763	4.33274	1.27781	0.846497
Cre10.g433750.t1.1.v5.5	9.68495	18.6643	59.5877	14.0279	8.69617	18.4364	15.2855	12.8505
Cre10.g433800.t1.2.v5.5	168.243	0.980718	11.666	1.8811	191.951	2.92324	1.91935	7.37172
Cre10.g433850.t1.1.v5.5	0.83701	0.786459	0.987166	1.56242	1.56166	0.363838	1.149	1.30615
Cre10.g433950.t1.1.v5.5	241.112	100.851	527.671	79.6141	270.861	97.5962	166.533	112.35
Cre10.g434150.t1.1.v5.5	2.18142	2.24921	1.57422	1.92078	2.35341	2.59521	3.40261	1.96265
Cre10.g434200.t1.1.v5.5	34.3989	60.0925	8.76657	28.0949	43.4029	41.5446	17.2069	33.4488
Cre10.g434250.t1.2.v5.5	7.72976	34.3719	59.6811	22.1215	10.7294	26.3402	9.66522	19.169
Cre10.g434300.t1.1.v5.5	2.04463	3.32293	0.678534	2.72599	1.12581	2.14888	2.30122	2.23111
Cre10.g434350.t1.1.v5.5	4.51685	0.351558	0.0861837	0.0887187	8.2654	0.237795	0.0192028	0.410638
Cre10.g434400.t1.2.v5.5	20.597	0.49528	1.34817	2.73394	20.2734	2.9729	4.52262	5.90868
Cre10.g434450.t1.2.v5.5	104.928	52.6618	72.5685	52.2279	70.8031	53.0378	51.333	46.1927
Cre10.g434500.t1.1.v5.5	11.7575	5.80103	8.10176	3.35143	13.2503	7.8201	5.55017	4.5934
Cre10.g434600.t1.2.v5.5	32.4949	4.60003	1.41852	4.59681	28.3777	6.49815	5.21671	7.64528
Cre10.g434650.t1.1.v5.5	30.1572	0.198217	0.0266286	0.218035	9.56353	0.16453	0.493598	0.713051
Cre10.g434700.t1.2.v5.5	1.37924	0.955604	1.47637	1.79865	2.73507	2.30281	2.62042	2.20611
Cre10.g434750.t1.2.v5.5	480.035	454.091	718.937	232.931	370.88	344.24	343.489	231.343
Cre10.g434800.t1.1.v5.5	4.38124	14.0099	14.8826	11.3309	2.33801	8.72007	7.15853	4.16097
Cre10.g434850.t1.1.v5.5	0.177209	0.270845	0.100146	0.440449	0.21068	1.40488	0.488477	0.258608
Cre10.g434900.t1.1.v5.5	0.489196	0.538227	0.472339	1.83814	0.167621	0.355017	1.12842	0.625762
Cre10.g434950.t1.2.v5.5	24.8669	68.2008	185.604	42.5377	29.344	60.6427	38.3891	26.7017
Cre10.g435050.t1.1.v5.5	0.0413518	0.110527	0.988673	0.0455791	0.0250233	0.0865431	0.0223638	0.0121908
Cre10.g435100.t1.2.v5.5	7.0673	7.81047	25.552	9.84399	4.33408	6.73762	6.09304	2.45054
Cre10.g435200.t1.2.v5.5	11.1216	44.3383	340.467	31.038	9.25715	56.1143	28.5607	13.6344
Cre10.g435250.t1.1.v5.5	6.28238	4.56113	1.62518	5.82547	4.14295	4.20028	6.20552	5.61894
Cre10.g435400.t1.2.v5.5	7.93581	13.2567	90.1627	16.5514	14.3082	27.5495	18.2819	8.49558
Cre10.g435450.t1.2.v5.5	10.7134	38.202	323.532	26.0982	23.2437	27.3528	31.7557	12.2611
Cre10.g435500.t1.1.v5.5	3.38461	26.6087	4.20522	3.31465	3.6895	19.415	4.01015	6.59782
Cre10.g435550.t1.2.v5.5	20.2724	18.6252	5.17661	6.8638	8.16172	11.7637	6.93153	4.95494
Cre10.g435600.t1.1.v5.5	1.38873	2.31618	2.91609	2.47368	0.594826	0.88344	0.708172	1.06508
Cre10.g435650.t1.1.v5.5	5.9795	2.00006	4.09339	2.48408	7.61305	1.03272	7.79441	1.78569
Cre10.g435750.t1.1.v5.5	0.689372	0.2426	0.183481	0.0438429	20.7352	0.206511	1.45522	2.29262
Cre10.g435775.t1.1.v5.5	0.379812	0.0276814	0.410333	0.165993	0.293123	0.0517228	0.0810268	0.191889
Cre10.g435800.t1.2.v5.5	348.698	132.398	281.479	141.001	254.72	90.9437	94.8955	79.107
Cre10.g435850.t1.2.v5.5	7.84558	4.12176	4.99342	5.59525	4.23108	4.05866	7.69047	5.32427
Cre10.g435900.t1.1.v5.5	1.52313	2.42603	0.455611	1.86551	0.747621	2.04583	1.16843	1.41672
Cre10.g435950.t1.1.v5.5	0.82702	1.08444	50.5441	2.96417	0.604383	0.0923352	0.303397	0.749958
Cre10.g436000.t1.1.v5.5	6.67587	31.6831	611.598	36.1066	2.20464	0.788099	2.2303	3.84934
Cre10.g436050.t1.2.v5.5	281.911	607.45	7981.26	574.138	208.378	204.284	421.588	181.974
Cre10.g436053.t1.1.v5.5	2.15559	0.190632	2.56226	2.34136	0.893156	0.42386	0.598427	1.76009
Cre10.g436150.t1.1.v5.5	7.67688	6.93435	3.34313	9.32396	4.55423	3.46776	5.97946	6.68274
Cre10.g436200.t1.1.v5.5	2.41069	2.63261	2.67789	2.74972	2.78675	3.63454	3.77114	2.16415
Cre10.g436300.t1.2.v5.5	2.3341	34.6362	15.1832	1.69359	0.463666	30.1107	25.2422	1.54559
Cre10.g436350.t1.1.v5.5	17.3811	42.0732	40.5284	18.129	10.5062	47.7321	33.4123	10.8356
Cre10.g436400.t1.1.v5.5	4.99011	26.1175	149.102	4.93481	8.05284	45.0765	33.7038	2.53628
Cre10.g436500.t1.2.v5.5	13.1229	23.2042	13.9162	13.0243	7.09898	16.7254	15.1725	11.6909
Cre10.g436550.t1.2.v5.5	429.781	180.549	729.738	59.4105	216.235	310.234	211.977	24.1353
Cre10.g436600.t1.2.v5.5	2.02547	2.64181	0.23536	2.27763	1.38596	2.3228	1.93713	1.93864
Cre10.g436650.t1.1.v5.5	10.0375	5.71686	0.0933299	7.33399	5.04587	3.30387	1.77819	4.11128
Cre10.g436700.t1.2.v5.5	0.174406	0	0	0.142197	0.511767	0.570839	0.0310789	0.569504
Cre10.g436850.t1.2.v5.5	2.21688	20.9329	2.32004	3.19463	2.71465	16.1781	11.0904	3.07068
Cre10.g436900.t1.2.v5.5	2.29876	0.455819	0.560621	1.82784	1.53878	0.532477	1.20595	1.90808
Cre10.g436950.t1.2.v5.5	4.78442	10.4996	41.8935	8.96732	7.28568	9.36736	13.3967	7.03096
Cre10.g437000.t1.2.v5.5	0.715616	0.892437	0.231871	1.48217	1.45822	0.974814	1.68062	3.68634
Cre10.g437050.t1.2.v5.5	5.34627	16.1026	1.2803	8.42917	5.89138	8.19518	5.83385	9.15815
Cre10.g437100.t1.1.v5.5	8.74423	13.5331	0.798698	13.8129	2.66089	10.0938	4.01108	7.46175
Cre10.g437150.t1.2.v5.5	18.18	5.77579	1.93047	7.63617	31.9484	5.7807	11.4429	12.6639
Cre10.g437201.t1.1.v5.5	0.312414	0.211365	0.292212	0.810354	0.268375	0.258117	0.347462	0.642728
Cre10.g437300.t1.1.v5.5	0.112327	0.00484957	0.18289	0.323691	0.113247	0.0820951	0.257984	0.373922
Cre10.g437350.t1.2.v5.5	8.72243	7.16024	93.0657	6.19255	10.2102	13.2354	27.2944	8.16357
Cre10.g437450.t1.2.v5.5	10.7273	10.2558	6.39282	8.10556	13.2325	18.39	15.9216	10.456
Cre10.g437500.t1.2.v5.5	84.0635	189.399	97.9255	110.455	110.199	125.995	131.467	88.6945
Cre10.g437550.t1.1.v5.5	0.264772	0.00637165	0.0757612	0.366114	0.368927	0.028464	0.285274	0.995275
Cre10.g437650.t1.1.v5.5	0.221371	0.976594	3.54813	3.12423	0.0589515	0.225849	0.438849	0.242712
Cre10.g437800.t1.1.v5.5	4.86809	2.00385	0.480662	3.12709	4.53294	1.59051	1.55998	2.36267
Cre10.g437829.t1.2.v5.5	2.74338	0.826403	0.557666	2.29346	1.00933	0.568583	1.34912	1.59291
Cre10.g437850.t1.1.v5.5	7.63353	7.97189	9.08154	8.35184	5.91815	12.1209	10.169	8.01393
Cre10.g437950.t1.2.v5.5	3.73181	2.38232	13.5744	6.25417	3.81758	4.08742	14.4744	4.28912
Cre10.g438000.t1.1.v5.5	1.21626	1.81184	3.59721	1.46471	1.11933	2.83766	4.06683	1.28612
Cre10.g438050.t1.1.v5.5	0.885356	1.97182	3.69768	2.58679	0.514645	2.82237	1.51386	2.26064
Cre10.g438100.t1.2.v5.5	12.2091	28.4059	91.3198	32.7888	12.6743	40.8865	18.5532	22.8451
Cre10.g438150.t1.2.v5.5	2.17916	2.62318	2.32813	3.69815	3.48534	5.13178	3.56015	4.63124
Cre10.g438200.t1.2.v5.5	4.14096	9.1818	11.0603	7.09093	4.70953	9.20934	5.32412	6.3174
Cre10.g438250.t1.1.v5.5	2.47617	2.01518	7.02922	2.09604	2.50688	9.89716	8.09973	3.21345
Cre10.g438300.t1.2.v5.5	1.97706	2.68737	2.79714	1.81293	0.826379	0.811294	1.50064	1.33719
Cre10.g438350.t1.1.v5.5	0.109644	0.100361	0.285313	0.469095	1.1663	0.658045	0.69984	3.67477
Cre10.g438400.t1.1.v5.5	2.79607	1.11406	12.0055	2.96266	2.46143	2.01492	1.78319	1.7276
Cre10.g438450.t1.1.v5.5	4.43328	3.04757	15.2724	1.60884	5.63252	2.79974	3.47595	2.57855
Cre10.g438500.t1.2.v5.5	9.859	7.70556	57.9652	4.12687	13.3795	13.2011	7.53324	8.29567
Cre10.g438550.t1.2.v5.5	74.4567	139.751	534.417	96.1343	70.9815	81.5061	106.707	71.6429
Cre10.g438600.t1.2.v5.5	142.268	79.3281	66.6704	74.1324	133.656	58.5976	71.5017	81.9919
Cre10.g438650.t1.2.v5.5	2.93744	11.1933	2.64724	3.87766	2.12637	6.90367	3.82353	3.77414
Cre10.g438700.t1.1.v5.5	13.5625	9.93988	0.300467	10.3424	7.23459	5.28369	2.14552	6.2145
Cre10.g438750.t1.2.v5.5	5.38206	12.019	38.6535	10.1508	5.68368	14.9684	15.1639	6.4774
Cre10.g438850.t1.2.v5.5	132.504	103.849	363.604	28.2514	142.105	58.3151	105.88	21.3152
Cre10.g438950.t1.1.v5.5	3.11757	3.59691	5.42677	3.89829	4.56011	4.86751	5.28643	3.59737
Cre10.g439000.t1.1.v5.5	1.36245	16.5959	6.41385	2.14726	0.836366	15.952	8.54812	1.47002
Cre10.g439050.t1.2.v5.5	3.31323	13.4541	20.7515	6.0445	5.60489	18.0021	7.26844	8.13165
Cre10.g439100.t1.2.v5.5	20.6678	55.1823	31.5695	25.8688	18.9232	34.6595	20.209	22.2301
Cre10.g439150.t1.2.v5.5	16.7015	78.5512	170.186	41.5666	25.4627	57.7965	38.0877	29.9695
Cre10.g439200.t1.2.v5.5	3.45528	8.3606	6.11999	4.28002	2.62646	6.72512	3.54406	2.99141
Cre10.g439250.t1.2.v5.5	6.38019	0.012575	5.72576	4.21062	3.54647	0.719	2.52049	7.37012
Cre10.g439300.t1.2.v5.5	1.44062	3.31751	1.4745	3.40745	1.07951	3.36194	3.57527	2.92421
Cre10.g439350.t1.2.v5.5	12.1736	35.4628	51.4064	21.4114	9.82381	21.4391	13.2749	15.9577
Cre10.g439400.t1.1.v5.5	7.20639	9.65516	9.93977	8.29206	3.74288	11.4143	10.6647	6.16379
Cre10.g439450.t1.1.v5.5	5.67091	0.946227	0.140846	0.262585	1.85355	0.901915	1.06894	1.31718
Cre10.g439600.t1.1.v5.5	5.89991	7.39043	9.05279	6.35276	5.99443	10.4582	11.4067	7.10318
Cre10.g439650.t1.2.v5.5	3.10578	8.13509	5.71318	4.80117	3.76852	13.0122	8.71355	5.87665
Cre10.g439700.t1.2.v5.5	3.7642	3.59411	5.45876	4.17088	19.1864	7.09332	10.8084	11.4617
Cre10.g439750.t1.2.v5.5	3.77182	0.100464	0.589216	0.742371	4.2081	0.492068	1.28131	1.41879
Cre10.g439800.t1.2.v5.5	0.261955	1.01631	0.0806663	1.4627	0.47359	0.814976	0.820977	1.90351
Cre10.g439850.t1.2.v5.5	42.3622	109.962	54.5696	62.754	52.824	115.11	47.5545	73.995
Cre10.g439900.t1.2.v5.5	10.461	63.7844	93.2551	28.6396	12.8202	174.527	77.0795	20.332
Cre10.g439950.t1.1.v5.5	20.7634	23.6251	48.1929	20.3535	15.2602	34.049	16.6572	12.9294
Cre10.g440000.t1.1.v5.5	0.525512	0.660889	0.154563	0.919831	0.369442	0.417315	1.49814	0.700548
Cre10.g440050.t1.2.v5.5	197.663	53.6055	128.906	47.8189	131.898	55.4661	76.3802	37.3682
Cre10.g440100.t1.2.v5.5	64.0402	32.005	25.4015	20.1239	79.4252	18.0589	32.1082	32.7779
Cre10.g440150.t1.2.v5.5	14.4794	34.5803	42.3117	20.931	17.6409	29.1697	27.3878	19.6598
Cre10.g440200.t1.1.v5.5	1.88798	1.24544	18.0097	6.18472	1.97141	3.42402	2.19601	3.85549
Cre10.g440250.t1.1.v5.5	2.47545	25.0146	161.093	12.5647	2.01139	21.9061	7.5139	2.8952
Cre10.g440300.t1.1.v5.5	8.6768	6.94302	44.8745	9.40771	7.62277	8.09889	6.26917	4.96841
Cre10.g440350.t1.1.v5.5	14.6998	11.2842	55.0905	9.93052	11.785	16.8697	13.0752	9.74573
Cre10.g440400.t1.2.v5.5	362.849	200.263	180.756	162.091	492.03	104.075	225.582	228.879
Cre10.g440450.t1.2.v5.5	145.929	675.762	519.116	50.5515	184.019	547.067	410.449	109.606
Cre10.g440550.t1.1.v5.5	4.88403	0.442912	0.708244	1.88806	5.47689	0.943278	1.93265	2.04169
Cre10.g440600.t1.2.v5.5	1.47344	0.0947978	0.738228	1.53913	0.477563	0.185918	0.628761	1.43752
Cre10.g440650.t1.1.v5.5	0.825639	0.25806	1.70642	0.948826	0.293441	0.248184	0.549467	0.388129
Cre10.g440700.t1.1.v5.5	27.774	22.7213	187.968	15.2663	54.2554	29.0388	43.6214	15.7096
Cre10.g440750.t1.2.v5.5	3.5247	3.29724	9.32552	6.09431	2.25805	2.55828	3.99286	3.26079
Cre10.g440800.t1.1.v5.5	3.18502	0.107086	0.146328	2.95099	2.20969	0.0714492	0.847066	3.20693
Cre10.g440900.t1.2.v5.5	5.29706	8.50613	1.03827	7.39443	2.7677	3.80005	2.49528	3.38314
Cre10.g440950.t1.2.v5.5	8.23345	0.459961	0.128396	1.22614	8.60953	1.73038	1.56676	2.35963
Cre10.g441000.t1.2.v5.5	19.0423	33.1128	32.2065	19.4691	18.1016	28.048	14.545	15.0225
Cre10.g441050.t1.2.v5.5	10.8707	9.66461	9.88368	7.61621	9.009	10.6171	5.7468	9.0539
Cre10.g441100.t1.2.v5.5	2.60938	3.26992	7.49238	3.77859	2.34429	4.81286	3.60999	3.88265
Cre10.g441200.t1.2.v5.5	88.8154	100.415	10.216	64.623	44.4073	59.6035	27.5287	46.0123
Cre10.g441250.t1.2.v5.5	2.39196	0.216697	2.172	5.11655	1.9998	1.14892	2.71477	7.05085
Cre10.g441300.t1.1.v5.5	11.9378	4.69125	19.9519	6.57207	8.6753	6.47878	9.36963	6.07199
Cre10.g441350.t1.1.v5.5	0.189708	0.0734301	0.0815928	0.123059	0.116486	0.0818843	0.0542609	0.0633661
Cre10.g441400.t1.2.v5.5	168.661	102.329	4.0954	103.864	74.8606	48.8464	11.0634	80.6769
Cre10.g441450.t1.2.v5.5	10.1749	19.871	2.18886	11.9764	6.20941	12.0452	1.58656	7.31198
Cre10.g441500.t1.2.v5.5	11.1829	11.9634	15.6274	6.99587	10.3788	13.7397	12.2486	12.9492
Cre10.g441550.t1.1.v5.5	0.133555	1.70278	3.48691	3.04879	0.163962	18.7692	10.8651	1.63342
Cre10.g441600.t1.1.v5.5	3.30921	2.83549	7.86644	2.83668	3.1025	3.82423	5.35565	3.44698
Cre10.g441650.t1.1.v5.5	5.37058	7.39477	3.04497	8.87517	5.61277	9.28915	6.8592	5.37629
Cre10.g441700.t1.1.v5.5	0.301485	0.0298641	0.0932275	0.696146	0.289279	0.246979	0.487289	1.04772
Cre10.g441750.t1.2.v5.5	19.1753	48.2209	196.114	28.04	17.4852	65.7226	59.6506	20.5862
Cre10.g441800.t1.1.v5.5	5.75942	5.09958	11.8014	5.70867	5.06926	8.77423	6.86587	4.74713
Cre10.g441900.t1.1.v5.5	10.8167	1.84694	1.90775	2.80379	6.07543	2.26865	1.80363	1.98412
Cre10.g441950.t1.2.v5.5	30.7573	42.0554	20.1234	34.6376	24.7564	25.4038	25.8896	26.3739
Cre10.g442000.t1.2.v5.5	6.58617	5.10533	0.07917	6.08914	3.14148	2.41005	0.862562	3.50177
Cre10.g442041.t1.2.v5.5	2.53792	0	0.181614	0.264511	3.39762	0.337171	1.39567	0.770043
Cre10.g442050.t1.1.v5.5	17.7741	13.8884	13.2772	13.0791	19.9777	16.0879	11.3779	14.608
Cre10.g442150.t1.1.v5.5	1.21558	2.84579	4.39068	2.2774	0.372718	1.88153	0.995686	1.25111
Cre10.g442200.t1.2.v5.5	3.69917	34.4829	136.307	13.716	2.18381	12.6167	7.1978	4.53683
Cre10.g442250.t1.2.v5.5	6.10147	3.97114	19.0438	5.10015	3.02299	2.37394	0.820772	3.47624
Cre10.g442350.t1.1.v5.5	2.83203	6.61093	37.026	4.22707	2.64036	7.40432	7.37892	2.63149
Cre10.g442400.t1.2.v5.5	18.4442	37.7338	66.855	24.3766	21.7387	40.0969	20.0778	19.2904
Cre10.g442450.t1.2.v5.5	3.06492	11.4789	44.1821	4.36182	2.5944	11.0385	4.47979	2.86476
Cre10.g442500.t1.2.v5.5	1.2925	0.437607	3.98538	0.930024	2.9942	3.32254	2.23114	3.28512
Cre10.g442550.t1.2.v5.5	1.28286	0.275467	2.54058	0.916824	2.42005	2.52828	2.05982	3.11748
Cre10.g442650.t1.2.v5.5	38.1954	17.7353	2.7232	24.2108	25.8676	10.342	5.28067	29.0209
Cre10.g442700.t1.2.v5.5	13.9574	13.4836	7.20925	12.6575	15.2491	17.3274	11.1196	14.5137
Cre10.g442750.t1.2.v5.5	8.2227	0.445947	4.49841	4.08231	3.9155	1.23725	2.95277	8.18234
Cre10.g442850.t1.1.v5.5	3.6466	8.54282	1.91225	4.82943	1.802	4.18069	3.75296	2.33181
Cre10.g442900.t1.1.v5.5	0.733299	13.9444	3.21664	3.67038	0.489474	5.86992	3.17031	1.6353
Cre10.g442950.t1.2.v5.5	3.77168	11.9559	2.06576	4.20288	3.48833	5.94972	6.98334	4.08979
Cre10.g443000.t1.2.v5.5	2.02425	2.18335	1.77181	2.9609	3.55617	2.45567	4.04595	3.14531
Cre10.g443050.t1.2.v5.5	130.614	1.10083	15.2764	20.3018	707.431	4.27625	47.1465	130.818
Cre10.g443100.t1.2.v5.5	2.95201	12.1624	9.61082	5.43803	5.30763	11.4049	6.77449	4.67424
Cre10.g443150.t1.2.v5.5	2.97273	0.286201	1.30329	0.59247	4.49218	0.91717	0.974209	1.15641
Cre10.g443250.t1.2.v5.5	17.3697	45.8546	27.2539	23.6612	26.4889	30.2545	17.591	18.1274
Cre10.g443300.t1.2.v5.5	11.5407	5.52249	4.72549	7.26251	13.7989	7.12902	9.02995	6.14388
Cre10.g443350.t1.2.v5.5	6.23114	11.937	19.9951	8.67137	4.69569	10.3585	6.18751	5.41914
Cre10.g443400.t1.1.v5.5	3.81182	4.39508	8.66481	3.6576	3.45418	6.26347	4.53945	4.40884
Cre10.g443450.t1.2.v5.5	0.617488	0	0.273049	0.32402	0.69527	0.0782204	0.313582	0.208881
Cre10.g443500.t1.2.v5.5	0.721703	3.59082	2.61371	1.2934	3.44687	7.8545	7.81595	4.271
Cre10.g443550.t1.2.v5.5	22.3796	16.9564	13.6287	13.2579	18.4796	17.5131	15.5868	15.0942
Cre10.g443600.t1.1.v5.5	9.25348	0.8715	0.377289	2.10117	3.88546	1.23154	1.62549	1.82939
Cre10.g443650.t1.1.v5.5	3.24773	13.9915	73.7683	6.52021	5.89167	12.2401	9.67975	5.59724
Cre10.g443700.t1.1.v5.5	3.86444	2.87656	3.52748	2.73819	4.4367	3.19279	2.41099	3.24412
Cre10.g443750.t1.2.v5.5	10.3435	1.80941	1.17509	4.96385	8.40141	5.26957	8.60049	8.65867
Cre10.g443801.t1.1.v5.5	1.61745	0.579407	0.522955	1.6014	1.21789	0.938672	1.51068	1.72952
Cre10.g443850.t1.1.v5.5	2.03824	2.08729	4.04222	4.27411	2.20709	2.70307	7.10702	2.10879
Cre10.g443900.t1.1.v5.5	2.67101	3.11038	0.477962	2.88782	1.88122	2.64608	2.29759	2.64118
Cre10.g443950.t1.1.v5.5	2.99252	8.685	25.3775	6.33189	4.25105	7.4003	8.20741	6.46846
Cre10.g444000.t1.2.v5.5	19.1188	4.1802	52.7375	17.0483	14.7922	21.0399	19.8826	20.1745
Cre10.g444044.t1.1.v5.5	0.0417337	0.0617566	0.443633	0.048671	0.047224	0.0524496	0.0399105	0.0763484
Cre10.g444094.t1.1.v5.5	0.0360062	0.149	3.20893	1.01107	0.546771	0.852891	1.34205	0.792611
Cre10.g444100.t1.1.v5.5	0.324477	0.680136	19.2259	3.42849	0.985566	2.62813	4.38148	2.05351
Cre10.g444150.t1.1.v5.5	2.03452	2.65217	24.8051	6.84798	5.41854	10.0895	12.4382	7.73294
Cre10.g444183.t1.1.v5.5	1.33154	0.164236	0.394639	0	3.19987	0.027689	0.0606154	0.504667
Cre10.g444216.t1.1.v5.5	0.739915	0	0.0991785	0.0240828	1.25068	0.0670546	0	0.302012
Cre10.g444250.t1.1.v5.5	2.20512	0.0159156	0.0881568	0.256791	2.16189	0.00536652	0.117143	0.524288
Cre10.g444300.t1.2.v5.5	8.3892	7.09066	41.6661	2.5783	16.6288	5.8662	10.9417	3.32604
Cre10.g444317.t1.2.v5.5	1.53543	1.29795	1.1609	2.50215	1.28062	0.789618	0.966329	1.90351
Cre10.g444400.t1.1.v5.5	12.2516	3.50581	5.35082	3.75837	14.6489	8.21176	8.92541	5.19962
Cre10.g444450.t1.1.v5.5	8.03015	0.48099	1.43502	2.42427	5.70987	1.09478	1.21363	2.65753
Cre10.g444500.t1.2.v5.5	24.9253	27.9847	29.8015	22.3159	21.0242	30.0014	44.3794	20.5081
Cre10.g444550.t1.2.v5.5	1.82939	140.179	98.3122	8.4631	2.98398	101.199	55.9789	5.41969
Cre10.g444600.t1.1.v5.5	4.76218	1.19057	0.678244	1.61964	4.5115	2.33033	2.29175	2.5153
Cre10.g444650.t1.1.v5.5	1.02271	1.09554	0.0709528	1.70995	1.01823	1.38156	0.518185	1.39261
Cre10.g444700.t1.1.v5.5	63.623	160.02	46.7416	29.5303	50.8804	69.9591	64.0199	24.2567
Cre10.g444750.t1.1.v5.5	5.35825	5.43566	1.12643	11.1427	5.53282	3.82963	3.83266	10.4186
Cre10.g444800.t1.2.v5.5	18.4376	27.0575	6.84844	20.5605	20.7147	12.9509	10.5075	24.1135
Cre10.g444850.t1.1.v5.5	4.5167	2.22461	0.882245	2.85843	5.53766	3.02603	3.11076	2.56194
Cre10.g444900.t1.1.v5.5	4.42331	9.45327	6.2934	8.82807	5.95594	11.0443	6.09259	8.23117
Cre10.g444950.t1.2.v5.5	5.24748	1.27168	64.2022	11.2254	2.27878	1.09488	2.56008	4.74165
Cre10.g445050.t1.2.v5.5	1.45326	28.9173	23.1011	16.6704	1.37007	1.92505	1.34378	0.924508
Cre10.g445100.t1.1.v5.5	2.47318	17.6595	4.59528	3.2689	0.650528	9.98773	7.88061	2.17219
Cre10.g445150.t1.1.v5.5	0.803529	4.98623	1.28966	1.41849	0.195927	2.91387	2.52653	1.04456
Cre10.g445151.t1.2.v5.5	0.521129	1.59796	1.98651	1.77856	0.455302	0.799145	0.314859	0.750502
Cre10.g445226.t1.1.v5.5	0.00467204	0	0	0.0483915	0.0113088	0.0156446	0.0133983	0.0297182
Cre10.g445600.t1.1.v5.5	15.2017	18.4593	17.618	19.3081	8.69298	8.00172	3.96053	10.4893
Cre10.g445650.t1.2.v5.5	3.2148	9.47578	13.1644	9.54158	3.85142	9.58631	5.94097	5.43841
Cre10.g445700.t1.1.v5.5	3.51499	5.30001	6.35933	4.76929	5.82528	6.22823	4.68388	4.44808
Cre10.g445750.t1.2.v5.5	13.8413	22.0585	12.0426	15.9138	8.43617	9.76968	7.78738	14.0101
Cre10.g445800.t1.1.v5.5	3.21691	0.109306	6.39867	4.36232	1.57891	0.725876	1.72074	5.36858
Cre10.g445850.t1.1.v5.5	1.60382	1.70611	0.528041	1.89911	2.51073	0.98486	1.27917	2.94033
Cre10.g445900.t1.1.v5.5	3.05367	3.85507	2.61731	4.25997	4.94586	5.43195	4.21024	4.69819
Cre10.g445952.t1.1.v5.5	0.633458	1.94276	2.28991	2.02954	0.625615	2.05312	0.662717	1.54153
Cre10.g446000.t1.1.v5.5	6.20084	9.67612	8.14697	8.13397	8.35389	15.3256	7.07127	11.2091
Cre10.g446050.t1.1.v5.5	11.2295	3.61741	0	3.40469	1.91034	1.855	0.617859	1.75338
Cre10.g446100.t1.2.v5.5	18.9943	47.8257	61.0222	25.8599	21.6372	27.5347	38.8008	24.7774
Cre10.g446150.t1.2.v5.5	2.52906	10.061	8.35931	4.6902	1.30372	7.23747	4.83447	2.89271
Cre10.g446200.t1.2.v5.5	3.70495	22.1355	53.2501	7.0508	12.3538	5.85901	16.4893	7.54792
Cre10.g446250.t1.1.v5.5	3.50241	2.15142	3.93529	3.2491	4.17525	0.493482	5.00633	3.22589
Cre10.g446275.t1.1.v5.5	0.07025	0.0167816	0.189251	0.0775779	0.735198	0.319826	0.243795	1.04935
Cre10.g446300.t1.2.v5.5	9.35349	8.00013	9.70729	5.52894	6.1603	2.50718	4.89179	3.86425
Cre10.g446350.t1.1.v5.5	6.66189	30.3505	6.99852	8.05812	7.99228	20.6183	26.3707	12.4089
Cre10.g446400.t1.1.v5.5	3.52404	3.01744	0.381963	2.25842	4.45963	3.20043	4.25028	5.26195
Cre10.g446450.t1.2.v5.5	12.0106	15.8277	12.1938	9.4266	10.5146	15.2792	7.77016	9.9832
Cre10.g446500.t1.1.v5.5	4.04866	12.2076	10.8607	12.4369	2.04004	6.69158	7.30422	7.3867
Cre10.g446550.t1.2.v5.5	62.1906	224.931	118.731	90.5498	48.7756	144.009	59.9426	65.7804
Cre10.g446600.t1.2.v5.5	0.159683	0.120958	0.152671	0.200059	0.193784	0.120795	0.30202	0.273326
Cre10.g446650.t1.1.v5.5	0.0765884	0.047478	0.193123	0.200721	0.198158	0.222901	0.303803	0.243747
Cre10.g446700.t1.2.v5.5	4.61919	17.2567	38.5933	7.09545	4.68502	29.6639	23.4001	6.8311
Cre10.g446750.t1.1.v5.5	1.39587	1.15283	3.84947	1.56147	1.86952	1.58379	2.36006	1.38918
Cre10.g446800.t1.2.v5.5	19.2794	9.98337	16.0704	7.65799	32.1751	8.83676	21.465	11.8639
Cre10.g446850.t1.1.v5.5	7.83288	3.50666	2.63721	5.65559	8.69653	3.65516	5.23745	4.87036
Cre10.g446900.t1.2.v5.5	12.6172	19.7271	33.9817	13.7712	13.027	15.9838	13.0252	11.9188
Cre10.g446950.t1.1.v5.5	5.235	9.54712	22.2622	6.90546	4.02113	8.01684	8.29716	5.32292
Cre10.g447000.t1.2.v5.5	27.139	19.8872	38.6209	16.4739	21.6733	48.0673	37.8119	19.0524
Cre10.g447050.t1.1.v5.5	16.5909	2.56667	7.93019	2.67785	27.9521	6.79812	5.39414	6.61101
Cre10.g447100.t1.2.v5.5	39.8578	102.164	175.058	40.3841	92.7033	99.3747	132.484	54.8292
Cre10.g447200.t1.1.v5.5	2.54487	3.26448	2.45266	3.21701	4.1329	5.93117	4.6429	3.72394
Cre10.g447225.t1.1.v5.5	0.0819529	0	1.50862	1.17119	0.196571	0	0.143806	0.276486
Cre10.g447300.t1.2.v5.5	2.34011	7.52363	23.3614	8.88906	3.59499	8.87432	7.84672	5.43043
Cre10.g447350.t1.2.v5.5	2.6846	5.04483	7.67447	3.76032	3.61277	7.46161	5.06383	5.21273
Cre10.g447400.t1.2.v5.5	3.42112	3.78467	9.50598	2.59941	4.11659	6.57253	3.84869	5.39858
Cre10.g447450.t1.2.v5.5	1.56791	0.574555	3.1442	0.958346	1.49094	2.19116	0.948996	2.43041
Cre10.g447500.t1.1.v5.5	0.932736	2.4298	0.642339	1.72546	0.85219	2.00136	2.16519	1.57185
Cre10.g447550.t1.1.v5.5	2.18591	3.68507	1.075	2.39891	2.42841	3.80691	3.43224	2.01831
Cre10.g447600.t1.2.v5.5	0.1316	0	1.17255	0.281671	0.368805	0.350018	0.365299	0.961256
Cre10.g447650.t1.2.v5.5	0.455261	0.160381	1.17366	0.234966	0.633677	0.90177	0.744392	1.32767
Cre10.g447700.t1.1.v5.5	2.93089	1.30885	1.3687	0.651823	10.2895	3.59703	4.46785	4.62626
Cre10.g447735.t1.2.v5.5	1.65646	1.61125	0.867255	1.99557	1.44355	1.45229	1.91615	2.01105
Cre10.g447767.t1.1.v5.5	16.3832	19.2028	2.76973	2.96093	19.0788	1.97865	6.54006	3.27782
Cre10.g447800.t1.2.v5.5	1.59749	162.347	1686.92	158.885	0.750559	0.903698	2.07347	0.750526
Cre10.g447850.t1.2.v5.5	6.52842	0.883795	8.96307	4.02966	3.32079	0.139931	1.00717	2.51436
Cre10.g447900.t2.1.v5.5	0	0.188122	0.0252082	0.15196	0.0787539	0.116879	0.113609	0.227629
Cre10.g447950.t1.2.v5.5	116.158	209.96	136.757	74.5548	136.401	358.52	402.85	46.5929
Cre10.g448000.t1.1.v5.5	8.82025	6.38055	2.84542	6.06225	4.97449	3.59638	4.61242	5.21378
Cre10.g448051.t1.1.v5.5	10.3877	48.5515	74.8859	14.2333	8.4075	37.3683	28.9085	8.22667
Cre10.g448100.t1.2.v5.5	2.47336	8.31288	5.37141	3.97355	1.81658	12.1633	9.62152	3.98728
Cre10.g448150.t1.1.v5.5	2.57272	0.0172655	0.211622	0.186525	26.104	3.03054	1.80456	7.56598
Cre10.g448200.t1.1.v5.5	0.48772	0.610846	2.88828	1.73425	2.66208	1.07219	1.83731	2.81565
Cre10.g448250.t1.1.v5.5	7.33934	4.95022	12.5334	3.7141	10.9866	5.24507	5.74899	5.08236
Cre10.g448300.t1.1.v5.5	2.97723	6.01614	2.79129	3.52655	2.20255	5.79952	3.21119	3.8699
Cre10.g448350.t1.1.v5.5	1.29367	3.62565	1.08853	3.04122	0.988342	3.77408	2.94843	3.48736
Cre10.g448400.t1.1.v5.5	0.0580064	2.14226	2.23387	1.06574	0.272199	3.05608	1.33103	0.566428
Cre10.g448550.t1.1.v5.5	0.181885	0	0.0876105	0.111959	2.19841	0.0377751	0.244241	0.811221
Cre10.g448600.t1.2.v5.5	0.914703	2.23511	5.38588	2.62238	2.43447	3.17512	3.66557	3.56837
Cre10.g448650.t1.1.v5.5	1.72581	1.23029	0.761891	2.23594	1.58859	0.580467	1.1035	1.05194
Cre10.g448700.t1.2.v5.5	4.40307	4.61363	1.54669	4.6465	2.49696	3.69368	3.12981	3.12477
Cre10.g448750.t1.1.v5.5	0.528714	1.58965	0.296088	2.55599	0.610238	2.39141	2.507	1.9018
Cre10.g448800.t1.1.v5.5	8.1025	2.80932	0.598994	5.3011	2.75344	1.67211	2.68124	2.82515
Cre10.g448850.t1.2.v5.5	10.8441	0.213596	0.26104	1.39374	12.5974	0.64464	1.75224	3.21888
Cre10.g448900.t1.1.v5.5	15.53	3.64201	11.8828	4.64639	19.1661	12.9001	13.6488	12.7973
Cre10.g448950.t1.1.v5.5	12.8886	6.53341	17.0301	7.14704	12.0659	6.58867	10.07	9.86571
Cre10.g448977.t1.2.v5.5	3.57379	0.2076	7.20962	0.758229	1.28192	0.0931037	0.263619	2.57944
Cre10.g449000.t1.1.v5.5	4.23549	2.98635	2.54237	1.58925	3.54797	5.36114	1.66357	3.74631
Cre10.g449050.t1.2.v5.5	2.11651	5.51807	1.95638	4.90019	2.84263	7.69289	4.19339	4.39446
Cre10.g449100.t1.2.v5.5	8.26415	11.707	98.6221	13.2202	15.4579	11.8694	33.9646	16.2311
Cre10.g449127.t1.2.v5.5	0.0680366	0	0.837268	0.186965	0.0699151	0.0448216	0.145676	0.317695
Cre10.g449138.t1.1.v5.5	0.26818	0	2.3033	0.99066	1.05491	0.142353	0.628083	2.38422
Cre10.g449150.t1.1.v5.5	2.56526	4.69618	14.1777	2.48219	0.881776	4.99058	2.98924	1.96244
Cre10.g449200.t1.1.v5.5	3.73778	7.38069	37.3056	7.74435	4.2547	4.97829	4.64538	2.93853
Cre10.g449250.t1.2.v5.5	30.6637	11.9615	71.9318	9.90523	19.5	13.6139	8.79015	7.21995
Cre10.g449300.t1.1.v5.5	0.607372	0.188388	0.318693	0.314614	0.567146	0.312122	0.487034	0.479436
Cre10.g449350.t1.2.v5.5	11.7243	14.8595	3.47422	9.95297	5.80289	10.0123	7.70384	9.50917
Cre10.g449400.t1.1.v5.5	0.913172	1.55159	1.2464	1.13643	0.820666	0.977513	2.49784	0.571091
Cre10.g449450.t1.1.v5.5	22.2065	1.61475	3.70098	2.8101	25.6815	1.15195	8.18084	5.04398
Cre10.g449501.t1.1.v5.5	0.0292369	0.0571224	0.0837717	0	0.443976	0.664452	0.50234	0.726138
Cre10.g449550.t1.2.v5.5	33.8732	8.32389	60.8929	30.5677	52.3993	21.7029	52.9049	41.1437
Cre10.g449600.t1.1.v5.5	0.711432	0.615046	1.07661	1.9881	0.551228	2.70691	3.75845	2.4737
Cre10.g449650.t1.1.v5.5	0.388292	0.782438	0.517228	1.2944	0.45765	1.45805	0.973888	1.21829
Cre10.g449700.t1.1.v5.5	10.0672	2.66695	1.13487	2.49827	9.03936	3.84217	3.35248	4.18214
Cre10.g449750.t1.1.v5.5	0.408078	0.233893	0.149286	1.05559	0.891109	0.28075	0.986799	0.936172
Cre10.g449800.t1.1.v5.5	0.760364	2.41887	2.40606	3.44221	1.46588	1.43156	1.5975	1.68027
Cre10.g449850.t1.1.v5.5	0.855096	0.619814	1.15778	1.20365	0.753509	1.1607	1.09153	0.737373
Cre10.g449950.t1.2.v5.5	0.55858	0.44085	0.706642	0.725792	0.410759	0.700402	0.976206	0.727287
Cre10.g450000.t1.2.v5.5	2.52981	5.15755	24.5325	3.74199	2.73823	10.7351	9.42911	2.1903
Cre10.g450050.t1.1.v5.5	0.715115	0.851548	1.75179	2.78133	0.856599	4.13023	1.97403	2.56875
Cre10.g450100.t1.1.v5.5	2.31632	1.32768	0.942725	1.41112	3.60246	2.93092	1.62728	2.34303
Cre10.g450150.t1.2.v5.5	3.32952	4.46803	1.99529	4.78343	4.54332	4.92568	2.45216	5.06104
Cre10.g450200.t1.2.v5.5	0.265788	0.670406	0.152753	2.02661	0.435909	1.06101	0.649073	2.78992
Cre10.g450254.t1.2.v5.5	3.24733	1.67727	0.311761	2.44869	1.93883	1.65618	1.82364	2.91372
Cre10.g450300.t1.1.v5.5	1.35339	0.277794	0	0.33752	1.03005	0.952216	0.529445	0.510578
Cre10.g450350.t1.2.v5.5	62.6024	2.12432	4.68974	11.5119	39.5362	6.61008	9.30222	18.0203
Cre10.g450400.t1.2.v5.5	94.5348	57.7505	46.5628	51.3466	81.7112	50.2287	65.4523	58.4477
Cre10.g450450.t1.2.v5.5	45.8335	8.12212	4.30295	9.88872	46.4016	8.73177	10.7493	15.6698
Cre10.g450500.t1.1.v5.5	3.86836	30.264	6.13319	4.73284	6.65045	32.3779	9.68711	11.0887
Cre10.g450550.t1.1.v5.5	0.638467	12.6969	1.18714	1.33536	0.777128	12.7453	5.56532	1.66462
Cre10.g450600.t1.1.v5.5	0.709256	0.393122	0.0765253	0.948634	0.973366	0.391317	0.254787	1.26605
Cre10.g450650.t1.2.v5.5	1.22362	1.508	9.93401	4.84056	1.82254	2.57919	3.8984	3.25053
Cre10.g450750.t1.2.v5.5	1.0658	0.814819	0.768236	2.60692	0.989663	1.98655	3.30905	2.68783
Cre10.g450850.t1.1.v5.5	3.36899	17.4417	413.095	67.5166	2.99542	1.95034	2.20814	3.47748
Cre10.g450879.t1.2.v5.5	15.5236	14.5445	0.696678	11.173	6.93941	7.03665	2.39935	5.6773
Cre10.g450900.t1.2.v5.5	1.28795	8.74547	1.35395	1.83538	0.755288	5.55989	2.94878	1.24888
Cre10.g450950.t1.2.v5.5	0.896898	0.146233	0.539849	0.0684292	0.259149	0.196369	0.0886925	0.210488
Cre10.g451000.t1.2.v5.5	7.49006	4.40331	0.574619	5.45787	4.09715	2.40032	1.70198	3.39712
Cre10.g451050.t1.1.v5.5	0.56949	0.231291	0.0699491	0.869204	0.504691	0.399938	0.545418	0.932829
Cre10.g451100.t1.1.v5.5	7.74352	3.60449	1.09697	3.5019	21.038	2.98715	7.0238	6.79829
Cre10.g451150.t1.1.v5.5	4.78196	1.77924	0.706319	1.24226	6.57105	2.33592	2.44899	3.3513
Cre10.g451200.t1.2.v5.5	0.706748	0.0165988	0.227137	0.0456641	0.0236677	0.0172547	0.0121114	0.118098
Cre10.g451250.t1.1.v5.5	4.41996	2.09238	2.18457	3.27852	4.70583	2.06745	3.40341	2.63428
Cre10.g451300.t1.1.v5.5	5.64911	1.28966	1.02423	4.65929	6.56212	1.08356	3.58687	4.76982
Cre10.g451350.t1.1.v5.5	6.96153	1.6706	1.10265	5.75916	3.30531	1.00646	2.08987	2.21871
Cre10.g451400.t1.1.v5.5	11.4122	3.31027	2.64061	3.54325	9.29513	1.51229	7.2923	5.44459
Cre10.g451450.t1.1.v5.5	2.43853	1.7172	0.189974	1.66911	7.61084	2.14262	2.58884	4.47419
Cre10.g451700.t1.1.v5.5	0.377216	0.343026	0.151935	1.24821	0.575808	0.426556	0.751235	0.684999
Cre10.g451752.t1.1.v5.5	40.0093	73.1288	45.6889	42.0321	58.2922	82.646	59.9209	65.0753
Cre10.g451850.t1.1.v5.5	0.723564	0.84391	3.17423	1.03644	0.280168	0.938375	1.57139	0.934526
Cre10.g451900.t1.1.v5.5	140.328	144.894	25.7481	101.4	77.8754	98.7254	50.0464	96.2683
Cre10.g451950.t1.2.v5.5	44.4222	12.8701	88.8399	14.9529	43.9393	16.4968	31.9538	18.8668
Cre10.g452000.t1.2.v5.5	5.68858	1.22545	39.9039	3.66557	4.48091	1.69518	10.958	2.43355
Cre10.g452050.t1.2.v5.5	463.48	119.927	22.1423	76.8139	1994.96	275.283	21.9197	358.267
Cre10.g452100.t1.1.v5.5	172.324	20.0916	93.7312	35.1865	266.111	50.9538	75.2682	100.656
Cre10.g452150.t1.2.v5.5	5.67333	16.6063	210.122	14.4746	5.19449	10.1942	9.34797	4.26656
Cre10.g452200.t1.1.v5.5	1.5807	1.32232	0.4616	1.83795	1.58912	1.85282	1.58757	1.98581
Cre10.g452250.t1.1.v5.5	0.102562	0	0.215448	0.048522	25.2462	0.492085	5.41083	22.1647
Cre10.g452300.t1.2.v5.5	1.09799	0.0150341	1.19866	1.19101	0.593638	0.609323	0.882719	2.26492
Cre10.g452350.t1.1.v5.5	2582.35	79.0365	246.409	211.772	3358.34	6.1609	392.103	254.272
Cre10.g452400.t1.2.v5.5	0.46721	2.09958	0.101236	1.87993	1.301	2.43555	1.74886	2.01347
Cre10.g452450.t1.2.v5.5	81.2291	106.875	185.469	53.5783	59.1831	109.396	100.88	36.8135
Cre10.g452500.t1.2.v5.5	8.03266	11.3123	0.911983	9.49866	4.55009	9.13195	1.85125	4.95671
Cre10.g452550.t1.2.v5.5	0.163218	0.154533	0.0445555	0.204261	0.20536	0.249918	0.0641419	0.273144
Cre10.g452600.t1.2.v5.5	12.2834	8.87017	3.00384	7.20818	5.85718	4.61233	1.09059	4.28506
Cre10.g452650.t1.2.v5.5	17.9554	110.255	337.757	51.5553	17.2952	55.5867	11.8796	25.3678
Cre10.g452700.t1.2.v5.5	1.10579	1.9179	0.598428	0.987782	1.92516	1.65813	1.15042	1.86925
Cre10.g452750.t1.2.v5.5	1.15803	4.32317	0.23539	1.59511	1.5607	4.01873	2.34939	2.42011
Cre10.g452800.t1.2.v5.5	25.765	84.1058	45.6338	12.1901	18.2268	96.5278	60.2569	13.7512
Cre10.g452850.t1.1.v5.5	1.21809	0.229057	0.952142	0.942449	4.15586	1.40682	2.0246	1.65865
Cre10.g452900.t1.2.v5.5	6.24194	1.81081	8.34174	5.63892	5.98573	4.16423	8.53889	5.77245
Cre10.g452950.t1.1.v5.5	6.07447	3.29015	3.54139	3.20779	8.70297	6.73818	6.20771	4.87003
Cre10.g453000.t1.2.v5.5	17.6034	22.723	20.7368	13.8186	10.7529	26.8967	14.0848	8.60256
Cre10.g453200.t2.1.v5.5	0.0961875	0.0431079	0	0.0861812	0.255243	0.0417449	0.0674321	0.209586
Cre10.g453300.t1.1.v5.5	1.33306	5.71218	51.6192	3.64966	0.842579	1.07859	1.92798	1.53582
Cre10.g453350.t1.2.v5.5	8.18902	15.0753	58.3966	14.9387	8.80174	31.1417	17.6619	8.38731
Cre10.g453400.t1.1.v5.5	1.43349	5.0965	5.32953	3.43248	1.44479	2.69014	2.55139	2.70979
Cre10.g453450.t1.2.v5.5	50.1706	83.6137	52.202	42.2362	49.7231	80.4254	53.8915	54.1871
Cre10.g453500.t1.2.v5.5	0.0755647	0.0371576	0.00954631	0.123129	0.186246	0.200453	0.100406	0.275388
Cre10.g453550.t1.1.v5.5	0.0873912	0.0474863	0.341685	0.112042	0.0279355	0.184564	0.0810485	0.0295316
Cre10.g453650.t1.2.v5.5	0.480415	0.00526566	0.387917	0.70538	0.39662	0.177385	0.309242	0.617722
Cre10.g453700.t1.1.v5.5	2.15804	2.08242	29.2266	1.9377	5.04217	0.807708	2.60119	1.61537
Cre10.g453707.t1.1.v5.5	2.24528	1.50626	3.45848	2.0206	2.90006	1.36345	2.39968	2.90096
Cre10.g453728.t1.1.v5.5	1.00778	0.204387	0.386229	0.565594	0.969534	0.427561	0.969611	0.956429
Cre10.g453750.t1.1.v5.5	0.479199	0.344508	0.454732	0.298251	0.316037	0.199746	0.255783	0.294158
Cre10.g453766.t1.1.v5.5	0.377004	0.134068	0.124543	0.228787	0.319936	0.170599	0.176529	0.436228
Cre10.g453782.t1.1.v5.5	0.484819	0.0459253	0.359897	0.247336	0.485725	0.0364185	0.436765	0.41709
Cre10.g453800.t1.1.v5.5	2.84027	1.37311	3.31472	1.41329	3.03826	1.30664	2.20034	1.77039
Cre10.g453900.t1.2.v5.5	7.55723	7.12538	6.63303	6.09122	6.49535	7.56638	5.38323	5.15549
Cre10.g454000.t1.2.v5.5	3.8973	0.175464	0.248711	0.914498	5.7263	1.16599	1.79693	1.68895
Cre10.g454025.t2.1.v5.5	4.0401	3.48949	14.0513	2.92392	10.9368	3.03429	7.31829	4.34203
Cre10.g454100.t1.2.v5.5	16.8804	16.3405	0.542211	13.7399	5.41839	7.06341	1.21396	5.66678
Cre10.g454150.t1.2.v5.5	33.0022	29.1426	47.2759	20.963	34.4399	76.7385	69.8067	25.4837
Cre10.g454200.t1.2.v5.5	2.05418	6.05789	3.28546	5.80747	2.64796	6.34675	4.96734	4.27279
Cre10.g454250.t1.2.v5.5	2.6313	1.61522	11.2442	6.94731	1.13084	1.81407	4.0759	2.59996
Cre10.g454300.t1.1.v5.5	0.510298	0.438609	0.141067	1.22435	0.240313	0.555041	0.754195	0.962094
Cre10.g454350.t1.1.v5.5	1.38971	1.12992	0.551529	0.844353	1.42176	0.524567	1.00007	1.03292
Cre10.g454400.t1.1.v5.5	3.51959	5.51715	30.2453	4.51875	3.9093	7.85426	6.16067	3.59304
Cre10.g454450.t1.1.v5.5	0.686132	1.20473	0.152468	0.679385	0.733676	0.901997	0.505389	1.00959
Cre10.g454500.t1.1.v5.5	0.326439	0.395408	0	0.40764	0.251518	0.251145	0.107276	0.371013
Cre10.g454550.t2.1.v5.5	3.08197	1.60784	1.72086	2.55649	1.98132	0.803852	2.16288	2.48896
Cre10.g454600.t1.1.v5.5	11.9527	5.44138	3.41254	7.16501	11.1653	4.57736	6.73708	8.76575
Cre10.g454650.t1.2.v5.5	6.33631	7.402	0.94199	6.4758	4.56391	6.744	3.46308	5.46218
Cre10.g454700.t1.2.v5.5	2.59068	1.18318	2.96237	2.10512	2.31684	3.39049	3.7992	2.35762
Cre10.g454734.t1.1.v5.5	0.430492	1.67276	2.05038	0.654323	0.666056	2.77015	1.70816	0.638199
Cre10.g454800.t1.2.v5.5	18.2759	24.1605	38.5004	18.5443	16.5316	22.8983	21.3154	18.6009
Cre10.g454850.t1.2.v5.5	0.406275	0.650706	1.04913	0.60495	1.69209	0.840975	1.25412	0.99401
Cre10.g454900.t1.2.v5.5	3.30817	2.5137	1.4815	2.23457	6.58269	2.82383	2.39371	3.00839
Cre10.g454951.t1.1.v5.5	5.15618	3.03738	1.08184	1.24194	5.73199	2.004	2.03561	3.72808
Cre10.g455100.t1.1.v5.5	1.01621	1.77478	0.977533	0.698317	2.10326	1.6437	2.27678	1.06425
Cre10.g455190.t1.1.v5.5	0.480971	0.466588	0.854984	1.66215	0.59457	3.09524	1.683	1.60122
Cre10.g455250.t1.2.v5.5	1.23103	3.50861	1.6026	1.8335	0.846592	7.88927	6.23768	1.43071
Cre10.g455300.t1.2.v5.5	48.99	98.1348	43.8644	42.2879	33.1742	91.5037	59.5946	36.703
Cre10.g455350.t1.2.v5.5	0.786837	0.650653	0.357664	1.33418	0.244076	0.425464	0.954912	0.718776
Cre10.g455400.t1.2.v5.5	0.355757	0.869156	0.0848753	1.01924	0.216346	0.925227	0.821003	0.542608
Cre10.g455451.t1.1.v5.5	0.792516	0.872129	2.02719	3.16355	1.6117	1.38385	2.05383	4.57355
Cre10.g455500.t1.2.v5.5	76.9337	88.6731	340.931	62.0667	74.9	132.041	67.2807	49.0929
Cre10.g455551.t1.1.v5.5	0.4469	1.11167	2.73109	1.1471	0.406097	0.324674	1.12522	1.11435
Cre10.g455600.t1.1.v5.5	1.529	0.136596	1.09839	1.87329	1.8972	0.476939	1.70965	4.41666
Cre10.g455625.t1.1.v5.5	0.0997279	0.00789479	0.0115779	0.101023	0.429804	0.123777	0.231425	1.19303
Cre10.g455650.t1.2.v5.5	2.45777	2.14937	2.08487	3.01897	2.35917	1.55609	2.74439	2.31924
Cre10.g455700.t1.2.v5.5	3.36821	2.97264	0.597974	4.56778	3.22833	1.7583	1.12673	5.04083
Cre10.g455750.t1.1.v5.5	1.64583	1.842	0.705107	2.67873	2.14526	1.88833	2.33163	2.96182
Cre10.g455850.t1.2.v5.5	7.26383	1.89929	3.36503	11.0982	9.68029	3.41311	6.12662	11.635
Cre10.g455900.t1.2.v5.5	0.595474	0.280733	0.122745	0.80756	0.177063	0.224581	0.316835	0.436818
Cre10.g455950.t1.1.v5.5	0.490278	1.04717	0.564367	1.29425	0.404588	1.17025	1.39295	2.10042
Cre10.g456000.t1.2.v5.5	51.5406	23.0443	112.893	28.8658	20.8357	17.3084	25.8251	22.913
Cre10.g456050.t1.2.v5.5	0.0428249	0.0210373	0.170132	0.0165786	0.0332079	0.0972727	0.020594	0.0951617
Cre10.g456100.t1.2.v5.5	6.89983	28.9302	412.68	57.8072	9.89027	22.5181	18.1882	21.5743
Cre10.g456150.t1.2.v5.5	2.38354	12.6292	9.75773	3.65123	0.507528	9.40031	8.3128	1.86402
Cre10.g456200.t1.2.v5.5	6493.85	8516.88	13490	2484.02	8409.55	2701.08	4726.35	3148.05
Cre10.g456250.t1.2.v5.5	26.4253	29.9129	184.256	36.4218	21.5008	13.36	10.373	15.4104
Cre10.g456300.t1.1.v5.5	4.74201	66.6074	15.2326	3.69898	2.61422	7.50575	3.36261	3.2592
Cre10.g456350.t1.2.v5.5	3.92097	0	2.47568	2.87966	1.85885	0.489254	0.948601	5.16383
Cre10.g456460.t1.1.v5.5	0	0.0277904	2.83457	0	0.0236499	0.0701133	0.0494047	0.0596263
Cre10.g456480.t1.1.v5.5	0.00737358	0.0678286	0.849492	0.0932973	0	0.0344061	0.0212069	0.0130427
Cre10.g456500.t1.1.v5.5	4.39891	3.37343	1.43833	3.77626	12.6742	4.44691	3.77999	4.92858
Cre10.g456550.t1.1.v5.5	1.1634	1.38483	0.805125	0.548649	0.72688	1.29499	0.690526	0.506055
Cre10.g456554.t1.2.v5.5	3.15094	2.3428	1.32627	1.82307	1.95502	2.76422	2.71877	1.5879
Cre10.g456600.t1.1.v5.5	2.92946	0.144884	0.203183	2.66429	3.79121	1.20726	1.1971	3.03862
Cre10.g456650.t1.1.v5.5	0.715602	25.4884	1.26737	1.78339	0.774607	3.9473	2.98916	2.32242
Cre10.g456700.t1.2.v5.5	17.3484	8.79787	17.1611	14.0389	27.5265	7.199	15.1221	14.5396
Cre10.g456750.t1.2.v5.5	20.8216	26.7684	1299.79	16.0944	42.9491	20.5444	120.909	17.2226
Cre10.g456800.t1.1.v5.5	0.796225	1.81326	0.401216	2.87283	1.15867	0.845174	0.987745	2.14036
Cre10.g456851.t1.1.v5.5	1.97124	4.04409	1.21728	2.4407	0.559538	3.34722	1.8555	1.47582
Cre10.g456900.t1.2.v5.5	7.31709	10.3109	4.83029	5.11663	15.9194	4.66245	8.29978	9.9747
Cre10.g456950.t1.1.v5.5	0.188901	1.00403	0.333736	1.25702	0.548308	1.44634	1.01338	1.46476
Cre10.g457000.t1.1.v5.5	5.19354	5.4267	10.5353	5.03807	3.65339	6.16666	6.53599	4.34001
Cre10.g457050.t1.1.v5.5	1.24678	0.209093	0.259997	0.727227	1.61646	0.455866	1.01982	2.59269
Cre10.g457100.t1.2.v5.5	7.91811	7.79907	230.74	14.5529	15.6915	25.4616	81.8064	16.1475
Cre10.g457150.t1.2.v5.5	2.49394	1.66934	8.6593	2.18634	4.82052	2.72698	5.68108	2.47345
Cre10.g457297.t1.1.v5.5	1.04737	0.586206	0.87528	0.809682	1.01099	0.672699	1.2225	2.59274
Cre10.g457331.t1.1.v5.5	0.904505	0.287253	0.144913	1.67075	0.981017	0.73173	0.806441	1.57
Cre10.g457400.t1.1.v5.5	3.04557	2.38947	2.39516	4.4423	2.9471	1.57404	3.16738	3.45846
Cre10.g457450.t1.1.v5.5	10.7036	15.2837	75.4598	8.94583	12.4984	10.119	9.48099	5.77226
Cre10.g457500.t1.1.v5.5	65.1557	23.4778	67.5676	25.8329	56.834	8.55444	38.3204	16.3172
Cre10.g457550.t1.2.v5.5	0.962896	2.06023	6.33582	2.95567	1.85395	2.80237	5.48269	2.00598
Cre10.g457600.t1.1.v5.5	4.77779	18.9057	18.4729	8.98522	6.4964	22.124	6.60638	10.0736
Cre10.g457650.t1.2.v5.5	24.455	50.7359	42.5269	19.3928	21.3121	41.571	35.762	24.9938
Cre10.g457700.t1.2.v5.5	43.422	78.1853	54.3132	41.7638	33.439	60.2445	32.7811	41.1679
Cre10.g457750.t1.2.v5.5	8.15176	8.11508	9.76146	2.52045	10.5364	21.1793	24.0014	11.5681
Cre10.g457801.t1.1.v5.5	0.18882	0.52694	2.52639	1.4911	0.354478	0.355317	0.252228	0.496133
Cre10.g457850.t1.2.v5.5	12.11	8.96992	6.3835	9.55479	6.40784	6.39286	5.28528	6.9234
Cre10.g457900.t1.2.v5.5	4.45855	13.925	10.4922	2.9091	2.37631	7.7813	4.06912	2.57926
Cre10.g457950.t1.1.v5.5	1.54371	6.93574	12.036	1.62959	1.69348	6.11496	1.88308	2.55525
Cre10.g458000.t1.2.v5.5	2.61896	3.12019	3.64421	4.77307	2.2093	5.17171	6.78732	6.21414
Cre10.g458050.t1.2.v5.5	1.45138	6.99763	16.8252	6.05474	0.894891	3.91541	3.39066	2.31128
Cre10.g458100.t1.2.v5.5	11.9715	4.66813	679.359	5.13746	43.7009	1.83116	9.12744	1.84497
Cre10.g458150.t1.1.v5.5	5.47164	3.30168	9.75421	4.00194	6.06415	3.30022	4.46326	4.43736
Cre10.g458216.t1.1.v5.5	0.025981	0.211128	0.0971737	0.18953	0.185771	0.20753	0.154577	0.419397
Cre10.g458250.t1.1.v5.5	0.878045	2.29648	24.0585	5.53958	1.52417	1.37281	3.397	2.55833
Cre10.g458300.t1.2.v5.5	0.633461	1.1564	8.49189	3.9676	1.35191	0.469714	0.834764	1.96451
Cre10.g458400.t1.2.v5.5	28.2546	10.5971	84.541	17.9056	16.6375	7.94445	21.5683	8.17498
Cre10.g458450.t1.1.v5.5	70.9087	2040.78	6123	319.668	68.7164	1252.35	1159.86	46.2448
Cre10.g458500.t1.2.v5.5	72.6252	177.458	220.121	50.194	98.043	164.612	100.925	48.0598
Cre10.g458550.t1.2.v5.5	218.175	189.801	226.846	156.332	236.304	154.208	256.503	161.508
Cre10.g458600.t1.1.v5.5	9.44006	1.38378	3.36915	1.37137	10.8415	3.18102	3.0953	2.72752
Cre10.g458650.t1.1.v5.5	3.29847	0.551866	0.451905	1.35733	2.72592	0.700009	1.20042	1.73549
Cre10.g458800.t1.2.v5.5	17.927	9.91348	5.98641	3.37378	6.24905	3.93391	1.81388	4.03617
Cre10.g458850.t1.2.v5.5	0.42679	0.341855	0.843146	0.228566	0.391394	1.35396	0.374347	0.862742
Cre10.g458900.t1.1.v5.5	23.4092	31.9199	133.684	24.3448	21.5428	43.7615	32.5879	18.1021
Cre10.g458950.t1.2.v5.5	2.78508	10.2349	5.36813	6.41823	5.73806	19.8716	13.6968	7.41608
Cre10.g459000.t1.1.v5.5	0.407554	4.10554	11.7292	1.40323	0.806751	2.52541	6.66017	1.1356
Cre10.g459050.t1.1.v5.5	0.904791	0.854798	1.62642	1.25076	0.909162	1.028	1.85415	0.947766
Cre10.g459100.t1.1.v5.5	2.02484	1.90858	6.31557	4.0438	2.9014	4.14688	3.94997	4.42215
Cre10.g459200.t1.2.v5.5	164.745	328.987	407.383	154.993	125.331	302.275	131.642	160.626
Cre10.g459226.t1.1.v5.5	0.502779	1.48625	0.983549	1.45896	3.35521	3.92069	2.05296	3.61666
Cre10.g459250.t1.2.v5.5	4648.62	5630.21	10736.1	1971.81	5498.24	1856.07	3276.91	2264.99
Cre10.g459300.t1.2.v5.5	3.72859	3.39949	8.22398	2.63038	4.6494	3.9873	3.69775	2.47361
Cre10.g459350.t1.1.v5.5	0.713333	1.35602	0.947162	1.26996	1.10827	1.79893	1.49548	1.33168
Cre10.g459400.t1.2.v5.5	14.8174	44.7705	12.33	17.2905	22.9627	26.3769	17.4982	25.5456
Cre10.g459500.t1.1.v5.5	95.4531	49.1846	22.2611	47.4669	45.3397	23.7709	9.44448	19.6312
Cre10.g459550.t1.1.v5.5	2.137	0.181199	3.81264	3.9494	1.52916	1.8063	1.85938	3.44483
Cre10.g459600.t1.1.v5.5	27.7135	9.46406	0.249142	16.083	13.6498	4.55076	1.47107	13.2091
Cre10.g459650.t1.1.v5.5	6.92283	0.412589	0.854748	1.45459	11.6878	2.31487	6.24116	5.43942
Cre10.g459700.t1.1.v5.5	1.40654	1.70243	0.754024	1.68386	1.73638	1.99637	1.7557	1.52199
Cre10.g459750.t1.2.v5.5	133.996	184.096	174.921	131.509	150.426	143.76	140.479	116.446
Cre10.g459800.t1.2.v5.5	2.21035	8.61413	40.1359	6.36808	1.42711	26.8498	12.741	2.73909
Cre10.g460000.t1.1.v5.5	0.587758	0.172228	1.4527	1.26859	0.385716	0.480982	0.970163	1.4343
Cre10.g460050.t1.1.v5.5	0.129947	0.0832909	0.466185	0.0809173	0.0480333	0.147108	0.0781296	0.278679
Cre10.g460100.t1.2.v5.5	0.453963	0.0526402	0.0112622	0.0570362	1.63302	0.160891	0.504247	1.1227
Cre10.g460150.t1.2.v5.5	0.173156	0.0669069	0.026577	0.148303	0.0695385	0.0114592	0.0175865	0.339985
Cre10.g460201.t1.1.v5.5	0.177277	3.26807	0.449185	1.86084	0.0591874	0.512216	0.454312	1.15816
Cre10.g460250.t1.2.v5.5	0.584984	0.321179	0.582426	1.48435	0.512957	1.32999	1.86211	2.36622
Cre10.g460300.t1.2.v5.5	1.54992	1.63693	15.2444	4.10583	1.05539	1.38539	2.75173	1.51165
Cre10.g460326.t1.1.v5.5	0.0893108	35.3557	18.1173	0.6556	0.243077	27.1392	27.8122	0.529339
Cre10.g460350.t1.1.v5.5	0.28712	0.941218	1.64032	0.582392	0.106461	1.36337	5.24913	0.225818
Cre10.g460400.t2.1.v5.5	0.114924	0.0301002	0.0548202	0.127311	0.109188	0.0601348	0.108728	0.12335
Cre10.g460466.t1.1.v5.5	2.19329	0.281291	2.13262	0.854893	2.28686	0.46067	0.855376	1.03983
Cre10.g460532.t1.1.v5.5	0.712924	1.44998	27.5154	4.3186	1.10613	1.27081	0.764364	1.29551
Cre10.g460600.t1.1.v5.5	1.47429	6.93129	0.803347	5.0851	2.59399	6.99723	3.78744	4.55684
Cre10.g460650.t1.2.v5.5	2.02867	2.3718	2.23562	5.34003	2.03882	4.31066	3.15156	3.5217
Cre10.g460700.t1.1.v5.5	3.10027	0.0130429	0.365489	0.595828	1.75704	0.49801	0.200961	2.76663
Cre10.g460800.t1.2.v5.5	1.51181	2.19888	1.94593	2.17248	1.73555	2.14641	2.16111	3.09723
Cre10.g460850.t1.1.v5.5	0.498715	1.01718	0.57029	0.535205	0.481549	0.503733	0.528432	0.383149
Cre10.g461000.t1.2.v5.5	7.10238	2.9292	0.104293	5.75347	4.34169	1.97474	1.31852	3.7253
Cre10.g461050.t1.2.v5.5	125.625	279.836	344.096	159.785	79.6307	230.4	147.315	110.545
Cre10.g461150.t1.2.v5.5	1.81399	3.76901	1.98091	3.35038	1.7449	2.81417	2.69664	3.004
Cre10.g461200.t1.1.v5.5	0.326469	0.0139001	0	0.0177257	1.84689	0.116268	0.0083007	1.15861
Cre10.g461250.t1.1.v5.5	12.8091	27.5802	99.4565	18.0337	7.43488	49.2091	19.0155	11.159
Cre10.g461319.t1.2.v5.5	1.29573	2.11653	9.77806	2.00181	1.79673	10.6773	4.4431	2.09862
Cre10.g461350.t1.1.v5.5	8.68911	1.83236	24.3517	5.62769	2.13852	2.136	2.67012	3.51332
Cre10.g461400.t1.1.v5.5	15.5395	5.30202	21.2497	8.04773	20.993	6.79792	10.992	9.03369
Cre10.g461500.t1.2.v5.5	0.209293	0.0477559	0.167985	0.0933142	2.16199	0.190692	0.405367	0.524221
Cre10.g461550.t1.2.v5.5	1.05388	0.199616	0.507788	0.727789	1.17374	0.574115	0.504322	1.05107
Cre10.g461650.t1.2.v5.5	8.0767	11.3477	40.9082	7.42228	6.30562	11.4029	5.79889	5.39246
Cre10.g461700.t1.1.v5.5	3.31418	8.34139	38.9108	8.68073	3.24528	8.49371	5.14857	2.75352
Cre10.g461750.t1.1.v5.5	0.769063	0.0348296	0.188775	1.84241	1.72429	0.27471	0.995628	2.90517
Cre10.g461850.t1.1.v5.5	0.221121	0.243828	0.555609	1.85068	0.190069	0.365191	0.402191	0.416878
Cre10.g461895.t1.2.v5.5	0.49015	0.460087	0.115808	0.489385	0.3618	0.29731	0.432814	0.561141
Cre10.g461900.t1.2.v5.5	11.0418	112.499	39.7702	25.8042	10.1685	60.6668	42.5771	17.1463
Cre10.g461950.t1.2.v5.5	16.2502	49.3113	139.644	42.443	35.0117	47.0023	55.9638	31.0734
Cre10.g462050.t1.1.v5.5	3.91185	1.79154	2.30624	4.34329	3.84164	1.01916	1.63962	4.69222
Cre10.g462100.t1.1.v5.5	0.877612	1.24202	0.103813	1.71856	0.796655	1.28796	0.586198	1.59179
Cre10.g462150.t1.1.v5.5	0.520995	0.932192	0.0799892	1.24395	0.950628	1.0588	0.689589	1.36708
Cre10.g462200.t1.2.v5.5	0.660834	1.17587	0.264967	1.52557	0.281155	0.622831	0.712669	0.89016
Cre10.g462250.t1.2.v5.5	28.7379	25.7248	27.2645	25.1343	42.0857	25.0823	21.4922	28.6848
Cre10.g462300.t1.1.v5.5	1.89062	2.82992	9.01215	3.18797	3.91971	5.26954	11.9542	2.59373
Cre10.g462350.t1.1.v5.5	6.61095	3.21395	0.476917	2.44142	20.4406	4.59949	7.37675	8.30229
Cre10.g462400.t1.1.v5.5	4.45144	3.23911	5.10965	1.67652	4.90834	3.46052	6.07832	1.8483
Cre10.g462500.t1.1.v5.5	8.12827	4.48247	7.27585	4.58207	7.21556	4.22568	3.30517	5.52864
Cre10.g462600.t1.1.v5.5	2.49238	2.4122	1.46865	3.11624	1.74351	1.95818	1.0287	1.80846
Cre10.g462650.t1.2.v5.5	17.9821	19.8102	99.7084	16.0796	19.3845	21.6503	19.3857	11.6749
Cre10.g462700.t1.1.v5.5	13.1858	13.0705	1.74883	11.178	6.92064	7.2749	7.07825	8.91481
Cre10.g462750.t1.1.v5.5	2.96641	5.81897	13.0182	6.75827	1.75351	3.15992	1.32847	2.52491
Cre10.g462816.t1.1.v5.5	0.318125	0.200123	0.0923541	0.19153	0.30785	0.176677	0.579607	0.166857
Cre10.g462850.t1.1.v5.5	0.345039	0.737705	0.111194	0.592205	0.199937	1.91993	0.664471	0.782532
Cre10.g462901.t1.1.v5.5	0.759762	0.267829	0.351779	0.343265	0.129134	0.279697	0.0824802	0.101385
Cre10.g462950.t1.2.v5.5	449.817	584.639	393.513	191.432	341.834	414.616	430.573	176.92
Cre10.g463026.t1.1.v5.5	3.78546	0.681833	0.236154	1.57419	5.43848	1.30041	1.49776	1.77536
Cre10.g463100.t1.2.v5.5	0.216452	0	0.0629132	0.016799	0.0354319	0.245882	0.0526555	0.189368
Cre10.g463150.t1.1.v5.5	14.7408	7.73319	3.46013	2.75669	14.7507	2.32013	5.32652	5.34674
Cre10.g463200.t1.2.v5.5	17.6272	8.67912	2.31345	9.67318	4.131	4.66528	3.66736	8.00611
Cre10.g463250.t1.1.v5.5	0.855683	7.54646	92.3352	9.34598	1.80195	5.68044	3.61357	2.50795
Cre10.g463300.t1.2.v5.5	2.87622	8.49498	4.92108	5.30979	3.22569	14.7808	6.155	5.51779
Cre10.g463350.t1.2.v5.5	0	0.0808756	0.0279991	0.0112144	0.0200833	0.357803	0.0139306	0
Cre10.g463370.t1.2.v5.5	7.94474	18.8138	1.16572	2.37975	31.6313	16.6577	13.5323	7.76118
Cre10.g463400.t1.1.v5.5	0.108125	0.243831	4.67463	4.20349	0.0659302	0.0537759	0.0951095	0.228728
Cre10.g463450.t1.1.v5.5	2.5272	10.5072	27.0355	7.12734	4.15952	6.8329	5.78053	4.9703
Cre10.g463500.t1.1.v5.5	0.104456	0.113958	0.136437	0.295001	0.231954	0.360053	0.144935	0.326215
Cre10.g463550.t1.1.v5.5	0.335106	1.66828	10.9639	8.28458	0.134856	0.535423	0.309886	0.8035
Cre10.g463600.t1.2.v5.5	2.75401	2.87162	11.2876	3.9005	3.48545	5.36687	5.73134	2.60093
Cre10.g463650.t1.2.v5.5	1.74928	5.52095	0.661113	3.99576	0.419796	1.92862	0.873019	2.6468
Cre10.g463700.t1.1.v5.5	9.87665	5.32694	3.05075	7.45219	7.52621	4.4619	5.07515	7.55218
Cre10.g463750.t1.1.v5.5	0.104934	1.89605	10.4477	2.5573	0.837977	3.13575	2.84047	0.366178
Cre10.g463850.t1.2.v5.5	5.18464	0.00915697	3.77254	2.76416	3.60135	0.513023	2.36477	7.27667
Cre10.g463900.t2.1.v5.5	0.423369	0.606091	0.372214	1.13387	0.400754	0.30703	0.586983	0.617722
Cre10.g463968.t1.1.v5.5	0.0651198	2.15405	1.59067	0.175954	0	0.206443	0.16354	0.115186
Cre10.g464037.t1.2.v5.5	0.0853579	0.0130578	0.0154922	0.201783	0.138037	0.0614398	0.131664	0.468553
Cre10.g464050.t1.1.v5.5	19.8427	16.2664	0.953863	16.0284	12.8982	10.4204	5.22091	10.6676
Cre10.g464100.t1.2.v5.5	10.4189	0.0283238	9.21086	4.74088	5.37119	1.44158	2.15792	10.4086
Cre10.g464133.t1.1.v5.5	0.875336	1.34737	4.00526	1.17278	1.26883	2.68988	0.831335	0.623196
Cre10.g464200.t1.1.v5.5	1.1232	4.24877	38.3593	4.20565	3.79371	23.9157	28.1757	3.16054
Cre10.g464250.t1.2.v5.5	0.402599	5.68978	2.1738	1.15404	0.309377	3.61417	3.13027	0.794281
Cre10.g464264.t1.2.v5.5	3.61091	4.35537	3.10933	3.40575	3.58041	2.32721	2.97962	2.69231
Cre10.g464300.t1.1.v5.5	2.78799	1.65441	0.745061	3.53887	2.2525	1.28069	2.26948	3.43825
Cre10.g464325.t1.1.v5.5	2.83745	1.49616	1.08441	4.09829	3.25593	1.56039	2.80872	3.6852
Cre10.g464450.t1.1.v5.5	0.884707	1.88628	4.23433	2.01616	1.70919	2.24251	2.97526	1.77799
Cre10.g464500.t1.2.v5.5	39.6677	42.2064	68.5274	26.8355	54.409	30.8273	31.3549	40.1918
Cre10.g464550.t1.2.v5.5	13.1509	6.66017	12.026	6.98372	10.0596	12.8116	6.89784	6.64294
Cre10.g464600.t1.1.v5.5	48.6115	27.6562	9.66629	44.7674	46.8041	15.913	29.4015	37.9712
Cre10.g464650.t1.2.v5.5	14.1606	8.5579	20.6052	8.68033	15.8357	10.0317	29.9168	9.01298
Cre10.g464700.t1.2.v5.5	3.30864	1.41903	5.25597	2.86054	2.85401	2.70264	4.70491	4.45568
Cre10.g464750.t1.2.v5.5	0.789348	0.898303	0.451069	0.799529	0.37083	1.50965	1.17138	0.682073
Cre10.g464800.t1.2.v5.5	0.282513	0.108966	0.0405516	0.304178	0.540131	0.505942	0.371133	0.738275
Cre10.g464850.t1.2.v5.5	14.9079	116.462	1459.11	31.4874	11.7295	81.1742	129	8.60032
Cre10.g464900.t1.1.v5.5	1.45339	18.0134	16.1816	3.99999	1.3346	11.6334	7.45729	1.20044
Cre10.g464950.t1.1.v5.5	1.3118	2.39324	2.50841	1.74201	1.53894	1.96224	1.40412	1.19262
Cre10.g465000.t1.1.v5.5	1.45799	3.57638	5.11562	1.88465	1.27047	2.62105	2.61918	1.75843
Cre10.g465050.t1.1.v5.5	1.77568	2.48071	13.1335	4.60082	1.93737	2.7147	8.24427	3.00267
Cre10.g465200.t1.2.v5.5	0.509988	1.17842	0.736799	1.84269	0.255821	0.548855	0.257713	0.606943
Cre10.g465250.t1.2.v5.5	38.4905	2.23529	3.92159	5.20025	32.9333	5.73499	5.29863	9.50003
Cre10.g465300.t1.1.v5.5	2.04385	0.561964	0.920088	1.14808	3.02162	1.03911	1.37506	0.826034
Cre10.g465400.t1.2.v5.5	0.801745	1.23287	1.24319	1.22757	0.500717	1.21067	0.916878	1.17158
Cre10.g465450.t1.2.v5.5	0.890762	0.84205	0.83329	2.08868	1.16914	0.62832	1.49178	1.61823
Cre10.g465550.t1.1.v5.5	68.1576	8.95028	25.0599	31.2055	63.7726	4.6656	10.3559	24.0222
Cre10.g465575.t1.1.v5.5	0.157233	0.288882	0.838333	0.613477	0.0501258	0.669426	0.314746	1.13655
Cre10.g465650.t1.2.v5.5	4.2823	0.274267	0.195513	0.769343	6.41469	1.01554	1.90745	2.01344
Cre10.g465700.t1.2.v5.5	0.284682	0.0269768	0.0244507	0.0146898	0.885272	0.145452	0.103971	0.205843
Cre10.g465726.t1.1.v5.5	0.804907	0.0884182	1.1924	0.424862	1.5489	0.139342	0.446173	0.70825
Cre10.g465750.t1.1.v5.5	2.6866	3.54922	8.58957	5.9646	13.31	9.73213	11.9076	8.31537
Cre10.g465757.t1.1.v5.5	0.64791	0.778615	6.83407	1.10976	1.25529	0.317038	0.714988	0.685785
Cre10.g465763.t1.1.v5.5	3.59364	0.271544	0.774325	0.641818	8.68673	0.923203	1.34411	2.86561
Cre10.g465793.t1.1.v5.5	0.338392	0.352877	0.197868	0.338218	0.140072	0.156227	0.212894	0.214929
Cre10.g465822.t1.2.v5.5	0.386633	0.287651	1.4544	0.197991	0.401736	0.475652	0.471283	0.436711
Cre10.g465850.t1.2.v5.5	5.41728	1.96324	1.42192	3.10518	3.9529	2.98518	4.3568	4.84055
Cre10.g465900.t1.2.v5.5	8.95984	22.4479	104.105	30.6068	12.5907	12.8088	10.3163	17.9139
Cre10.g465950.t1.2.v5.5	14.7392	58.7452	343.694	27.7386	18.1968	64.3258	29.9827	29.0935
Cre10.g466000.t1.2.v5.5	7.05639	35.0245	137.735	14.0238	4.80154	23.5259	5.23428	4.36495
Cre10.g466100.t1.2.v5.5	48.3417	15.4811	5.26827	17.5862	63.5616	25.4673	23.6318	29.36
Cre10.g466150.t1.2.v5.5	0.406765	0.793406	1.15505	1.04001	0.774924	0.650879	0.720432	0.742824
Cre10.g466200.t1.1.v5.5	4.28041	0.521711	0.383264	4.715	3.29252	0.879264	1.48491	5.2946
Cre10.g466250.t1.2.v5.5	6.66504	5.02204	0.106466	4.79777	3.29425	2.94958	0.816641	3.34545
Cre10.g466300.t1.2.v5.5	0.945274	3.71208	0.514772	2.442	1.12935	2.78513	1.24969	2.58207
Cre10.g466350.t1.1.v5.5	8.38894	17.7174	63.6429	15.3865	13.2725	9.12892	8.4981	8.6814
Cre10.g466450.t1.1.v5.5	8.95025	9.76474	0.589139	8.64441	4.81886	8.21832	1.46317	5.11434
Cre10.g466500.t1.2.v5.5	38.8779	14.0971	30.6108	25.9031	44.8272	22.2519	29.3857	41.006
Cre10.g466550.t1.2.v5.5	2.21019	2.01702	1.29951	2.52915	2.03712	2.04875	3.07306	2.16618
Cre10.g466600.t1.1.v5.5	0.0873888	0.0219264	0	0.108414	0.357238	0	0.0159987	0.179668
Cre10.g466650.t1.2.v5.5	92.1882	2.45581	2.93097	8.30744	106.854	11.4424	9.98613	25.9952
Cre10.g466700.t1.1.v5.5	3.41078	12.1047	57.5281	9.14055	4.92871	7.71033	33.2237	4.78612
Cre10.g466750.t2.1.v5.5	0.322392	0.620175	2.11888	0.357883	0.0954323	0.167367	0.220706	0.0457023
Cre10.g466800.t1.1.v5.5	15.8986	3.32061	9.87258	9.53183	14.146	4.13794	6.92806	7.45138
Cre10.g466850.t1.1.v5.5	14.054	64.8745	6.98883	4.67101	5.38534	27.0174	62.936	8.59685
Cre10.g466900.t1.2.v5.5	11.3171	19.3477	27.6667	7.45846	12.6848	20.1165	16.9074	13.9094
Cre10.g466950.t2.1.v5.5	0.0346237	0.0340732	0.0687471	0.0503452	0.0383076	0.144752	0.108238	0.106437
Cre10.g467000.t1.2.v5.5	76.5068	5.46375	15.3251	9.58219	51.8976	15.3459	10.2508	17.0468
Cre10.g467050.t1.2.v5.5	9.05242	11.3428	25.8419	6.8992	10.1547	12.3169	7.00435	7.69917
Cre10.g467100.t1.1.v5.5	7.95875	3.02777	0.930827	9.69201	2.49426	1.1367	0.548296	4.90125
Cre10.g467150.t1.1.v5.5	7.40937	16.9471	134.82	19.3478	3.72033	7.20016	6.08712	6.24537
Cre10.g467200.t1.1.v5.5	0.697644	0.779147	0.373907	2.33091	1.00843	1.84278	1.03652	2.04429
Cre11.g467350.t1.2.v5.5	37.0424	2.81548	15.0762	11.9707	86.245	6.07052	45.5749	25.603
Cre11.g467400.t1.2.v5.5	21.6849	8.64521	1.17639	10.5281	16.7154	7.63618	4.68377	14.2515
Cre11.g467450.t1.1.v5.5	0.212227	0.0257257	0.0805975	0.108809	0.373278	0.0669125	0.202837	0.443792
Cre11.g467500.t1.2.v5.5	2.31398	7.28052	13.6298	6.53167	2.13723	10.3431	5.8879	3.83228
Cre11.g467524.t1.1.v5.5	9.22385	37.5219	55.7463	18.7323	7.86201	16.9664	11.4852	10.5238
Cre11.g467525.t1.1.v5.5	2.52155	2.48768	4.3709	1.99892	2.28826	2.06036	2.5157	1.91389
Cre11.g467526.t1.1.v5.5	7.09746	3.24023	3.08714	4.92232	1.10472	1.36126	0.511962	1.29567
Cre11.g467527.t1.1.v5.5	343.479	70.7269	14.6922	22.5349	113.549	27.6703	9.50981	37.231
Cre11.g467529.t1.1.v5.5	3.67268	3.86041	1.51822	2.10648	4.1793	3.7429	3.19663	2.50134
Cre11.g467530.t1.1.v5.5	11.1418	1.80747	1.16956	2.57274	5.56021	3.85441	2.1194	4.17645
Cre11.g467531.t1.1.v5.5	67.4853	1.50824	2.6188	4.87343	152.53	0.256608	11.7504	6.42738
Cre11.g467533.t1.1.v5.5	2.76275	1.03463	0.233991	1.78767	10.5695	1.11427	4.59194	2.91125
Cre11.g467535.t1.1.v5.5	30.144	89.7556	31.2557	36.028	66.642	86.1745	61.551	53.7617
Cre11.g467536.t1.1.v5.5	21.5716	14.5552	26.822	16.3526	23.948	16.948	13.2929	15.1557
Cre11.g467537.t1.1.v5.5	1.28322	0.138488	1.561	1.66472	1.04424	0.361221	1.14624	3.55688
Cre11.g467538.t1.1.v5.5	64.6842	0.135551	0.330743	1.6309	20.6723	0.315461	0.143288	1.63761
Cre11.g467539.t1.1.v5.5	18.0217	1.60603	1.48058	2.53646	9.85793	4.57997	1.20362	5.74214
Cre11.g467541.t1.1.v5.5	10.1409	4.435	1.29459	6.72667	11.2924	3.14398	5.86896	7.33545
Cre11.g467542.t1.1.v5.5	0.619789	0.262221	0.111019	0.818129	0.494767	0.36157	0.664478	0.919508
Cre11.g467543.t1.1.v5.5	54.551	42.8458	84.4606	58.9109	71.6717	11.2081	32.5574	51.3429
Cre11.g467544.t1.1.v5.5	3.96707	12.9474	26.338	7.48106	5.00727	9.8325	10.0278	5.44559
Cre11.g467546.t1.1.v5.5	2.12588	0.783602	1.66414	1.29834	2.94765	1.60544	1.34983	1.39861
Cre11.g467547.t1.1.v5.5	41.3222	66.2181	6.19657	70.1676	22.1427	33.4816	7.68815	34.2603
Cre11.g467549.t1.1.v5.5	0.908393	1.05965	1.82656	1.27317	0.942614	1.37649	1.87582	1.22041
Cre11.g467550.t1.2.v5.5	20.5505	26.7999	3.74708	17.6993	9.39402	12.194	6.07531	7.0138
Cre11.g467551.t1.1.v5.5	2.1554	1.98958	8.68202	1.92067	6.48992	4.46721	6.47323	1.93001
Cre11.g467552.t1.1.v5.5	0.0089694	0.00876212	0	0.0690576	0.0684087	0.0273251	0.0449021	0.183664
Cre11.g467553.t1.1.v5.5	2.08244	11.1161	0.834968	5.02605	4.32518	12.6245	6.03116	9.22791
Cre11.g467554.t1.1.v5.5	3.63407	8.43876	8.27849	4.15614	1.68881	13.4189	7.77523	1.77599
Cre11.g467555.t1.1.v5.5	11.6424	12.8636	122.252	22.6326	15.1936	20.6866	23.0623	7.29749
[truncated: 12,438 more rows]
